# Supplementary material for: Cytotoxic Drimane-Type Sesquiterpenes from Co-Culture of the Marine-Derived Fungi Aspergillus carneus KMM 4638 and Beauveria felina (=Isaria felina) KMM 4639
Source: MDPI journal article supplement (doi:10.3390/md20090584), 2022-09-19
Supplement: s1 [file s1]

## SUPPLEMENTARY MATERIAL

# Cytotoxic Drimane-type Sesquiterpenes from Co-Culture Marine-Derived Fungi *Aspergillus carneus* KMM 4638 and *Beauveria felina* (= *Isaria felina*) KMM 4639

Olesya I. Zhuravleva<sup>1,2</sup>, Elena B. Belousova<sup>1,2</sup>, Galina K. Oleinikova<sup>1</sup>, Alexandr S. Antonov<sup>1</sup>, Yuliya V. Khudyakova<sup>1</sup>, Anton B. Rasin<sup>1</sup>, Roman S. Popov<sup>1</sup>, Ekaterina S. Menchinskaya<sup>1</sup>, Phan Thi Hoai Trinh<sup>3</sup>, Anton N. Yurchenko<sup>1,\*</sup> and Ekaterina A. Yurchenko<sup>1,\*</sup>

<sup>1</sup> G.B. Elyakov Pacific Institute of Bioorganic Chemistry, Far Eastern Branch of the Russian Academy of Sciences, Prospect 100-letiya Vladivostoka, 159, Vladivostok 690022, Russia

<sup>2</sup> Institute of High Technologies and Advanced Materials, Far Eastern Federal University, 10 Ajax Bay, Russky Island, Vladivostok 690922, Russia

<sup>3</sup> Department of marine biotechnology, Nhatrang Institute of Technology Research and Application, Vietnam Academy of Science and Technology, Nha Trang 650000, Vietnam

\* Correspondence: yurchenkoan@piboc.dvo.ru (A.N.Y.); eyurch@piboc.dvo.ru (E.A.Y.); Tel.: +7-423-231-1168 (A.N.Y. & E.A.Y.)

**Abstract:** Chemical investigation of co-culture marine-derived fungi *Beauveria felina* KMM 4639 and *Aspergillus carneus* KMM 4638 led to the identification of three new drimane-type sesquiterpenes asperflavinoids B, D and E (**2**, **4**, **5**) and nine previously reported related compounds. Their structures were established using spectroscopic methods and by comparison with known analogues. Cytotoxic activity of isolated compounds against several cancer and normal cell lines were investigated. Compounds **3** and ustusolate E (**9**) shown significant effect on human breast cancer MCF-7 cell viability with IC<sub>50</sub>s of 10 µM and induced in these cells the caspase-dependent apoptosis and arrest of MCF-7 cell cycle in G2/M phase.

**Keywords:** marine-derived fungi; *Aspergillus carneus*, *Beauveria felina* (*Isaria felina*), co-culture; secondary metabolites; drimane sesquiterpenes; cytotoxicity

## Content

|                                                                                                    |    |
|----------------------------------------------------------------------------------------------------|----|
| Figure S1. CD spectrum of <b>1</b> .....                                                           | 4  |
| Figure S2. CD spectrum of <b>3</b> .....                                                           | 4  |
| Figure S3. CD spectrum of <b>4</b> .....                                                           | 5  |
| Figure S4. CD spectrum of <b>5</b> .....                                                           | 5  |
| Figure S5. CD spectrum of <b>10</b> .....                                                          | 6  |
| Figure S6. CD spectrum of <b>11</b> .....                                                          | 6  |
| Figure S7. CD spectrum of <b>12</b> .....                                                          | 7  |
| Figure S8. UV spectrum of <b>1</b> .....                                                           | 7  |
| Figure S9. UV spectrum of <b>3</b> .....                                                           | 8  |
| Figure S10. UV spectrum of <b>4</b> .....                                                          | 8  |
| Figure S11. UV spectrum of <b>5</b> .....                                                          | 9  |
| Figure S12. UV spectrum of <b>10</b> .....                                                         | 9  |
| Figure S13. UV spectrum of <b>11</b> .....                                                         | 10 |
| Figure S14. UV spectrum of <b>12</b> .....                                                         | 10 |
| Figure S15. <sup>1</sup> H NMR spectrum (700 MHz, acetone-d <sub>6</sub> ) of <b>1</b> .....       | 12 |
| Figure S16. <sup>13</sup> C NMR spectrum (175 MHz, acetone-d <sub>6</sub> ) of <b>1</b> .....      | 17 |
| Figure S17. COSY-45 spectrum (700 MHz, acetone-d <sub>6</sub> ) of <b>1</b> .....                  | 18 |
| Figure S18. HSQC spectrum (700 MHz, acetone-d <sub>6</sub> ) of <b>1</b> .....                     | 19 |
| Figure S19. HMBC spectrum (700 MHz, acetone-d <sub>6</sub> ) of <b>1</b> .....                     | 20 |
| Figure S20. ROESY spectrum (700 MHz, acetone-d <sub>6</sub> ) of <b>1</b> .....                    | 21 |
| Figure S21. Expanded <sup>1</sup> H NMR spectrum (700 MHz, DMSO-d <sub>6</sub> ) of <b>1</b> ..... | 22 |
| Figure S22. <sup>1</sup> H NMR spectrum (700 MHz, acetone-d <sub>6</sub> ) of <b>2</b> .....       | 31 |
| Figure S23. <sup>13</sup> C NMR spectrum (175 MHz, acetone-d <sub>6</sub> ) of <b>2</b> .....      | 37 |
| Figure S24. COSY-45 spectrum (700 MHz, acetone-d <sub>6</sub> ) of <b>2</b> .....                  | 38 |
| Figure S25. HSQC spectrum (700 MHz, acetone-d <sub>6</sub> ) of <b>2</b> .....                     | 39 |
| Figure S26. HMBC spectrum (700 MHz, acetone-d <sub>6</sub> ) of <b>2</b> .....                     | 40 |
| Figure S27. ROESY spectrum (700 MHz, acetone-d <sub>6</sub> ) of <b>2</b> .....                    | 41 |
| Figure S28. <sup>1</sup> H NMR spectrum (300 MHz, CDCl <sub>3</sub> ) of <b>3</b> .....            | 42 |
| Figure S29. <sup>13</sup> C NMR spectrum (75 MHz, CDCl <sub>3</sub> ) of <b>3</b> .....            | 47 |
| Figure S30. DEPT-135 NMR spectrum (75 MHz, CDCl <sub>3</sub> ) of <b>3</b> .....                   | 48 |
| Figure S31. COSY-45 spectrum (300 MHz, CDCl <sub>3</sub> ) of <b>3</b> .....                       | 49 |

|                                                                                                     |     |
|-----------------------------------------------------------------------------------------------------|-----|
| Figure S32. HSQC spectrum (300 MHz, CDCl <sub>3</sub> ) of <b>3</b> .....                           | 50  |
| Figure S33. HMBC spectrum (300 MHz, CDCl <sub>3</sub> ) of <b>3</b> .....                           | 51  |
| Figure S34. ROESY spectrum (300 MHz, CDCl <sub>3</sub> ) of <b>3</b> .....                          | 52  |
| Figure S35. <sup>1</sup> H NMR spectrum (700 MHz, CDCl <sub>3</sub> ) of <b>4</b> .....             | 53  |
| Figure S36. <sup>13</sup> C NMR spectrum (75 MHz, CDCl <sub>3</sub> ) of <b>4</b> .....             | 58  |
| Figure S37. DEPT-135 NMR spectrum (75 MHz, CDCl <sub>3</sub> ) of <b>4</b> .....                    | 59  |
| Figure S38. COSY-45 spectrum (700 MHz, CDCl <sub>3</sub> ) of <b>4</b> .....                        | 60  |
| Figure S39. HSQC spectrum (700 MHz, CDCl <sub>3</sub> ) of <b>4</b> .....                           | 61  |
| Figure S40. HMBC spectrum (700 MHz, CDCl <sub>3</sub> ) of <b>4</b> .....                           | 62  |
| Figure S41. <sup>1</sup> H NMR spectrum (700 MHz, CDCl <sub>3</sub> ) of <b>5</b> .....             | 63  |
| Figure S42. <sup>13</sup> C NMR spectrum (75 MHz, CDCl <sub>3</sub> ) of <b>5</b> .....             | 68  |
| Figure S43. DEPT-135 NMR spectrum (75 MHz, CDCl <sub>3</sub> ) of <b>5</b> .....                    | 69  |
| Figure S44. COSY-45 spectrum (700 MHz, CDCl <sub>3</sub> ) of <b>5</b> .....                        | 70  |
| Figure S45. HSQC spectrum (700 MHz, CDCl <sub>3</sub> ) of <b>5</b> .....                           | 71  |
| Figure S46. HMBC spectrum (700 MHz, CDCl <sub>3</sub> ) of <b>5</b> .....                           | 72  |
| Figure S47. ROESY spectrum (700 MHz, CDCl <sub>3</sub> ) of <b>5</b> .....                          | 73  |
| Figure S48. Expanded <sup>1</sup> H NMR spectrum (700 MHz, CDCl <sub>3</sub> ) of <b>9</b> .....    | 74  |
| Figure S49. Expanded <sup>1</sup> H NMR spectrum (700 MHz, CDCl <sub>3</sub> ) of <b>10</b> .....   | 79  |
| Figure S50. Expanded <sup>1</sup> H NMR spectrum (700 MHz, DMSO-d <sub>6</sub> ) of <b>11</b> ..... | 83  |
| Figure S51. Expanded <sup>1</sup> H NMR spectrum (700 MHz, DMSO-d <sub>6</sub> ) of <b>12</b> ..... | 88  |
| Figure S52. Expanded <sup>1</sup> H NMR spectrum (700 MHz, CDCl <sub>3</sub> ) of <b>12</b> .....   | 93  |
| Figure S53. <sup>1</sup> H NMR spectrum (700 MHz, acetone-d <sub>6</sub> ) of <b>1a</b> .....       | 99  |
| Figure S54. <sup>1</sup> H NMR spectrum (700 MHz, acetone-d <sub>6</sub> ) of <b>2a</b> .....       | 100 |

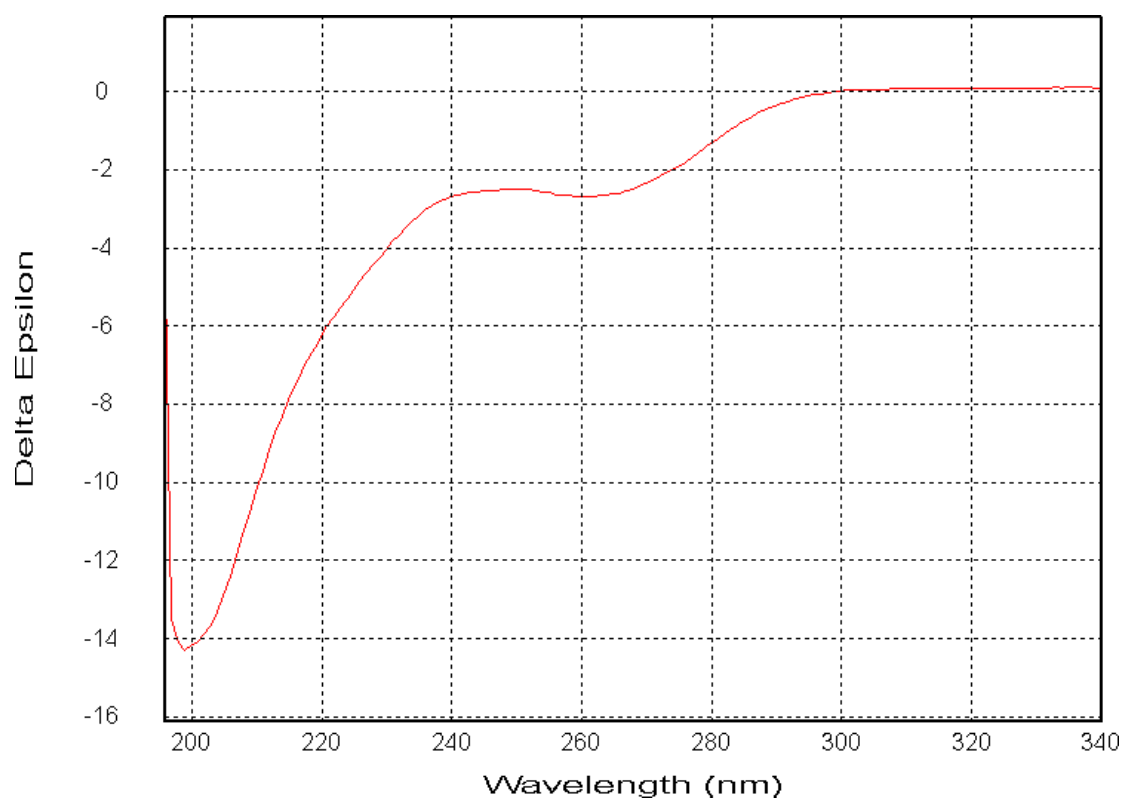

Figure S1. CD spectrum of **1**

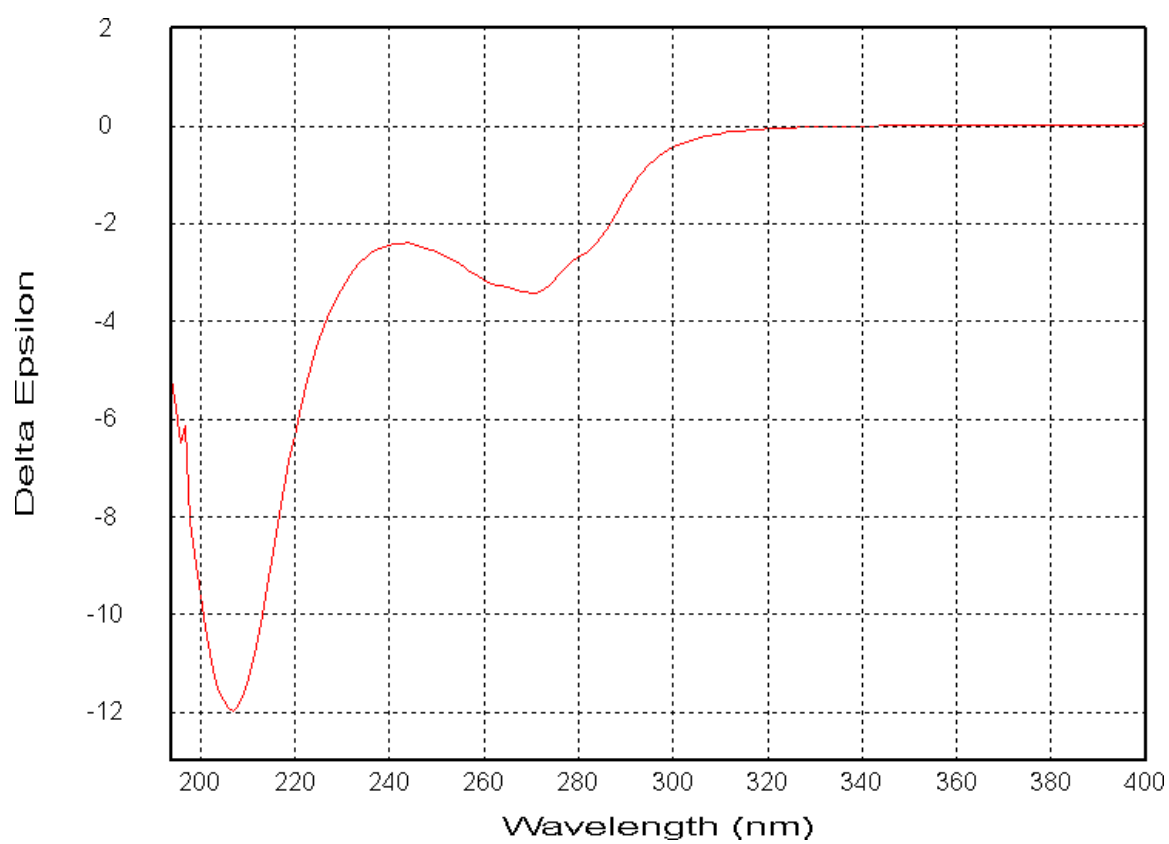

Figure S2. CD spectrum of **3**

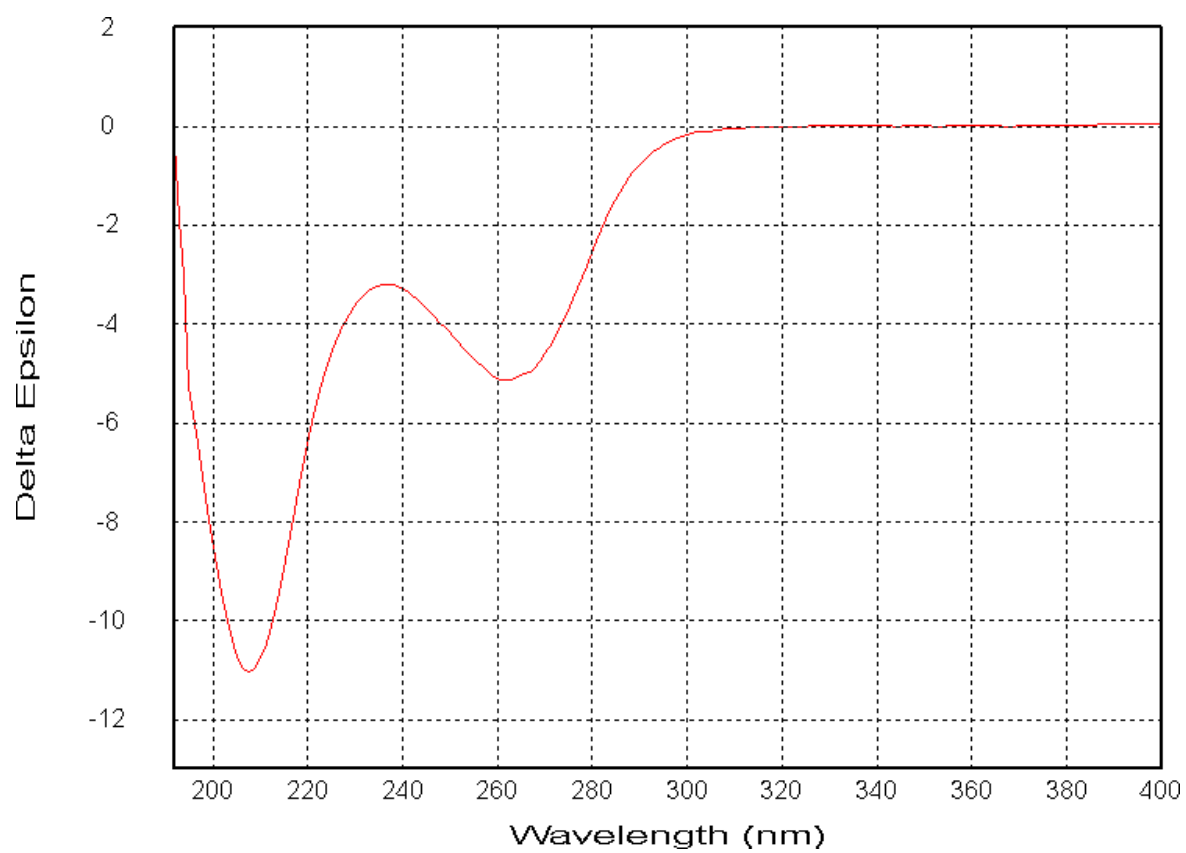

Figure S3. CD spectrum of **4**

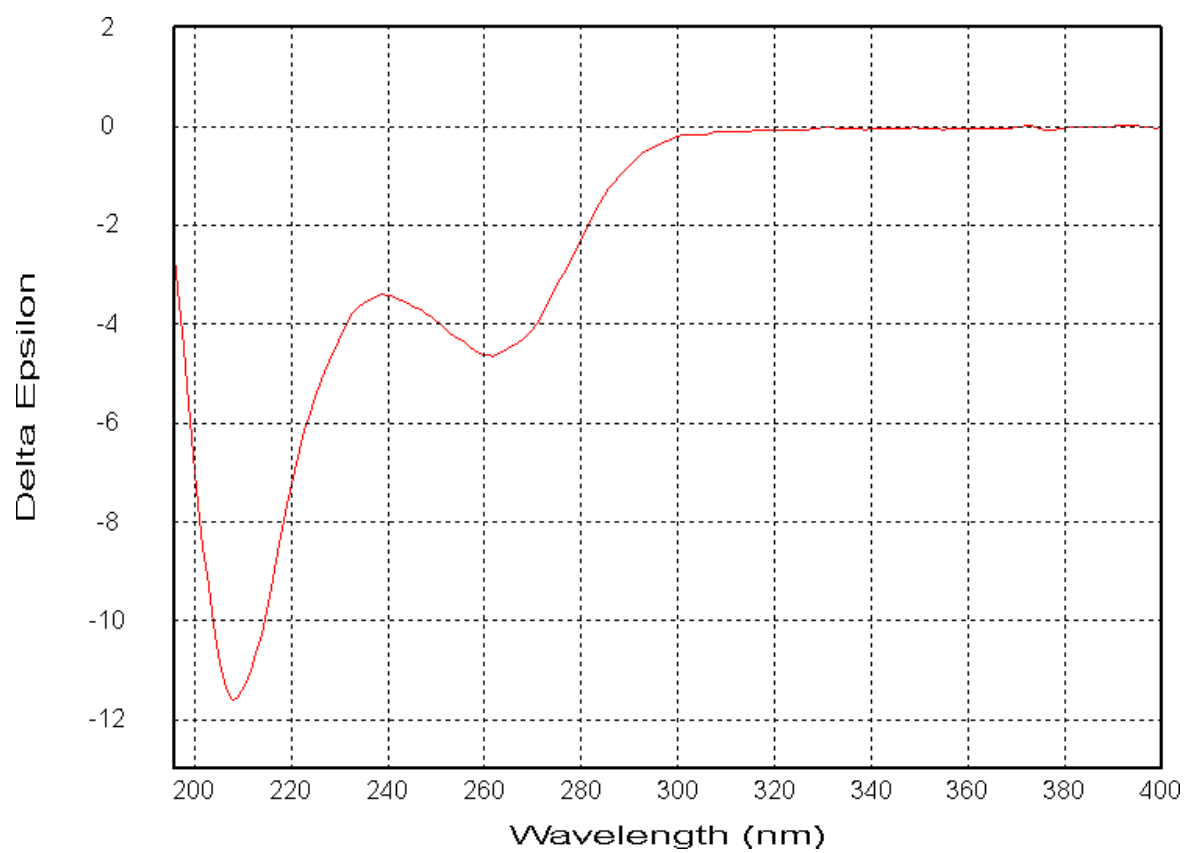

Figure S4. CD spectrum of **5**

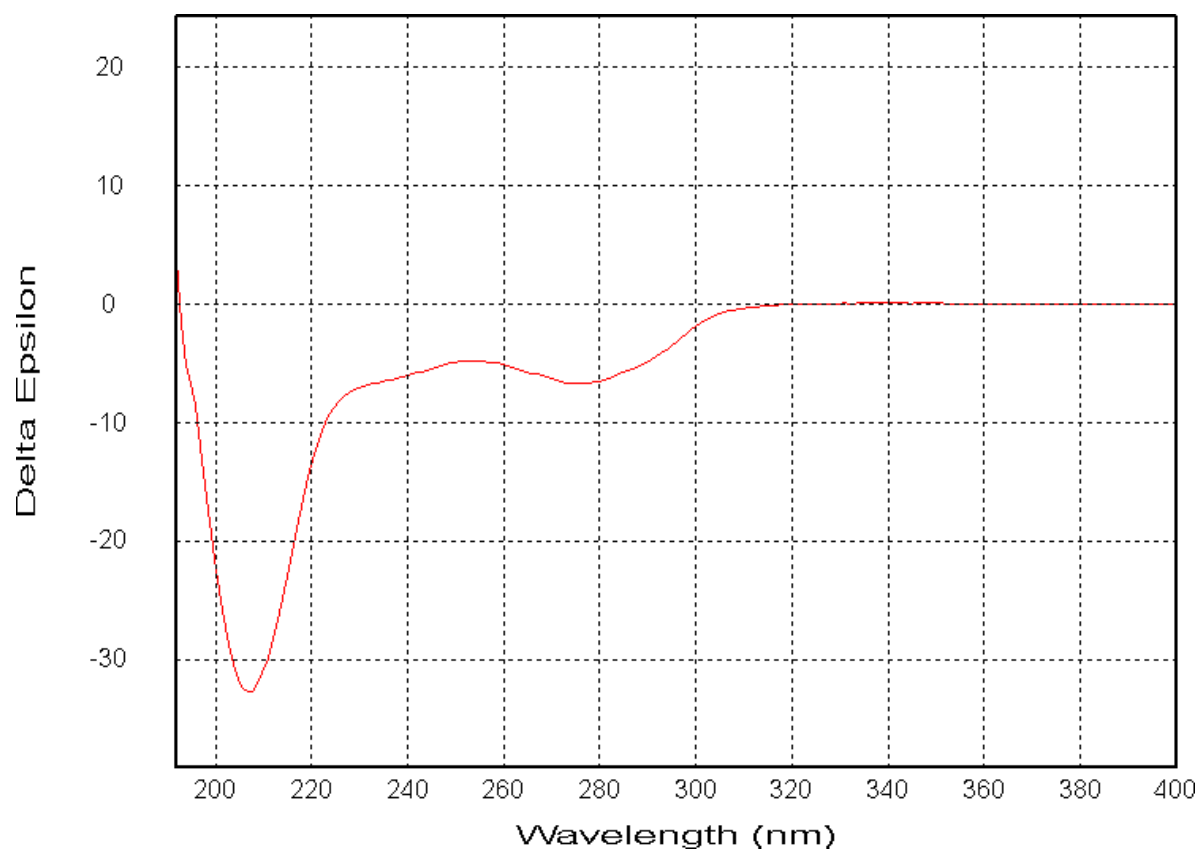

Figure S5. CD spectrum of **10**

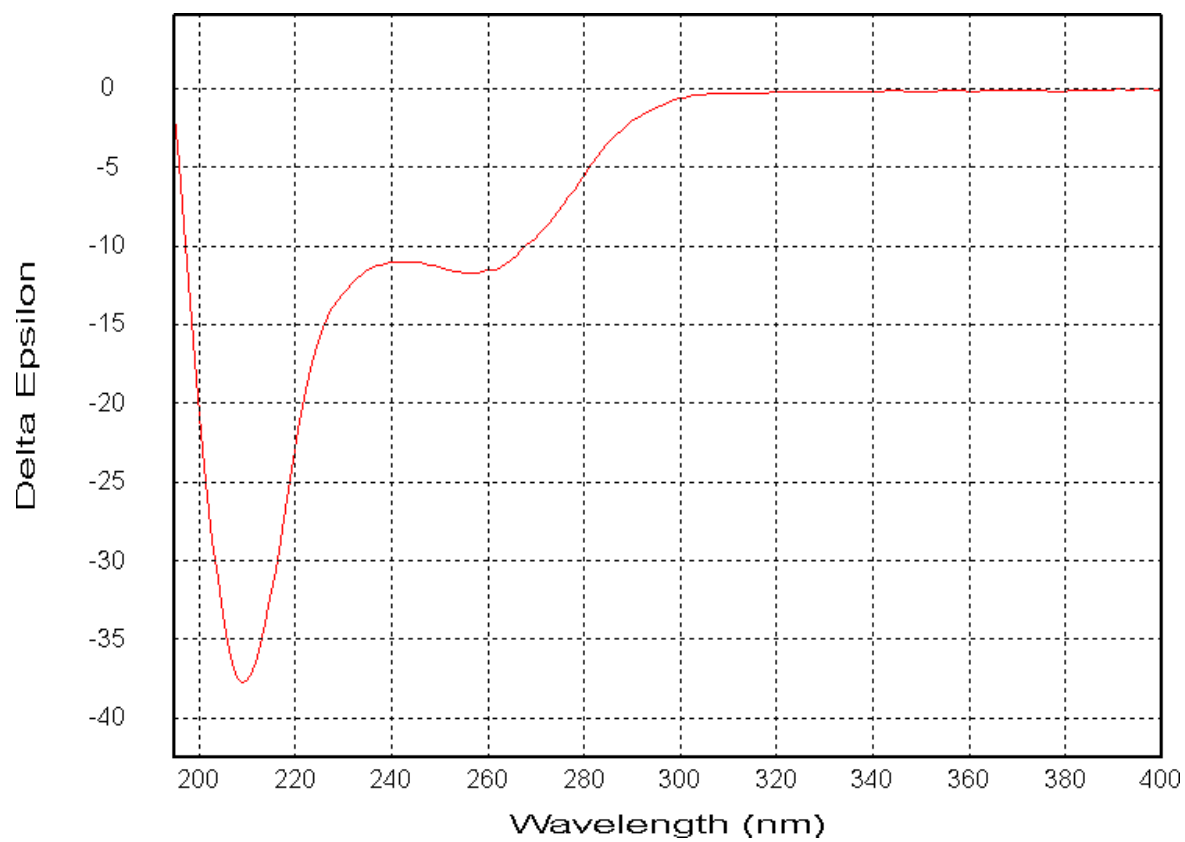

Figure S6. CD spectrum of **11**

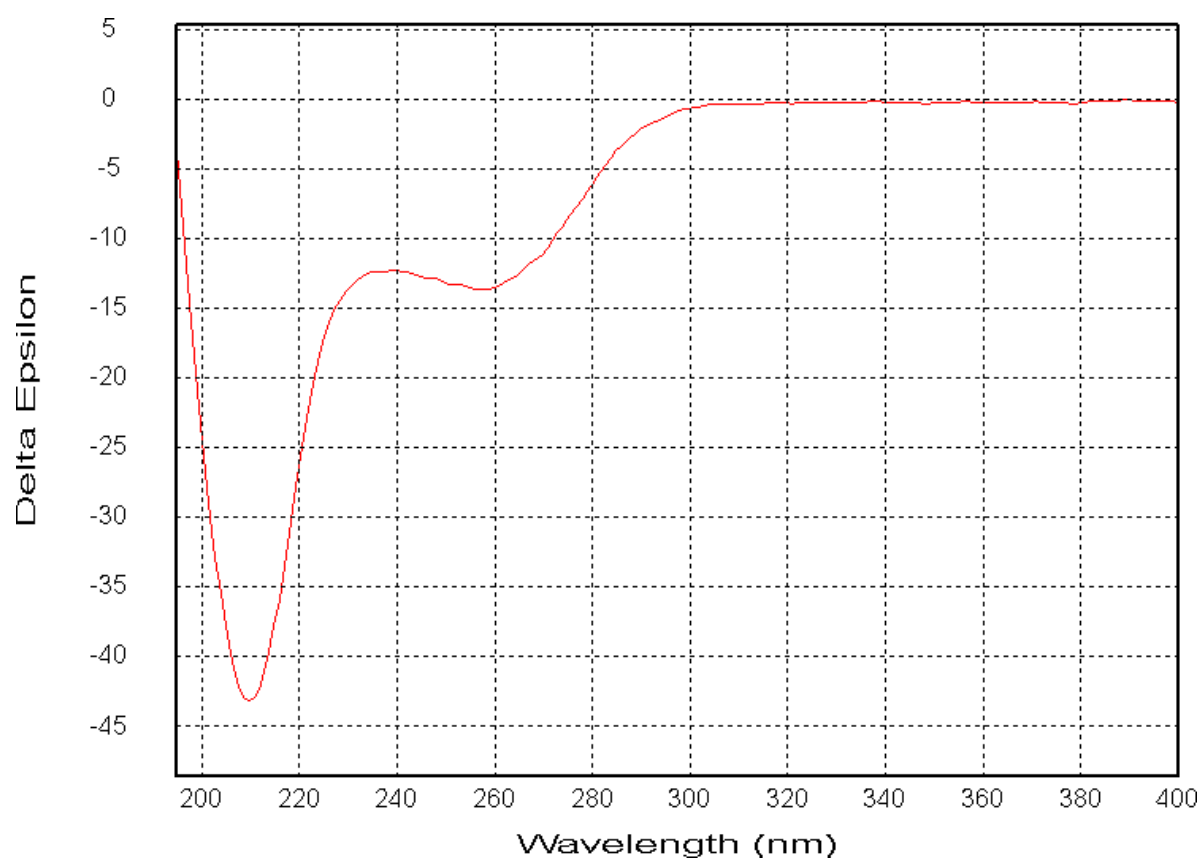

Figure S7. CD spectrum of **12**

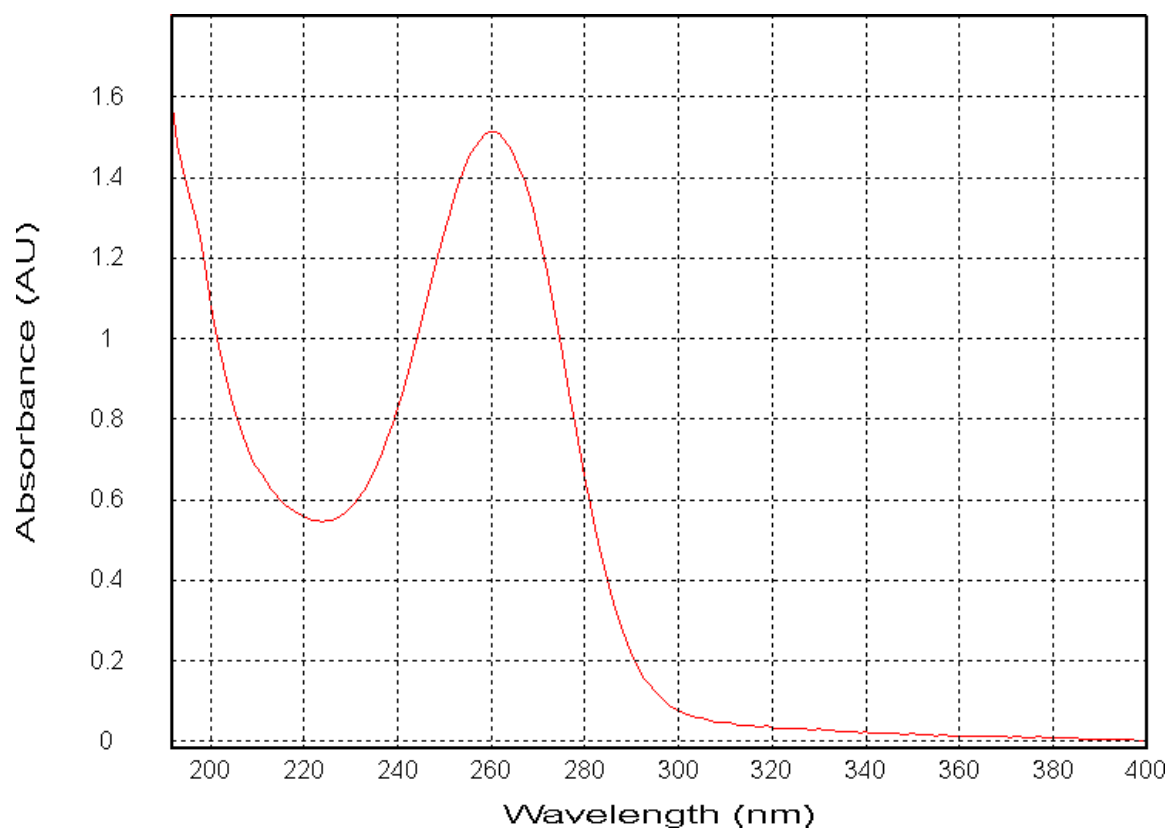

Figure S8. UV spectrum of **1**

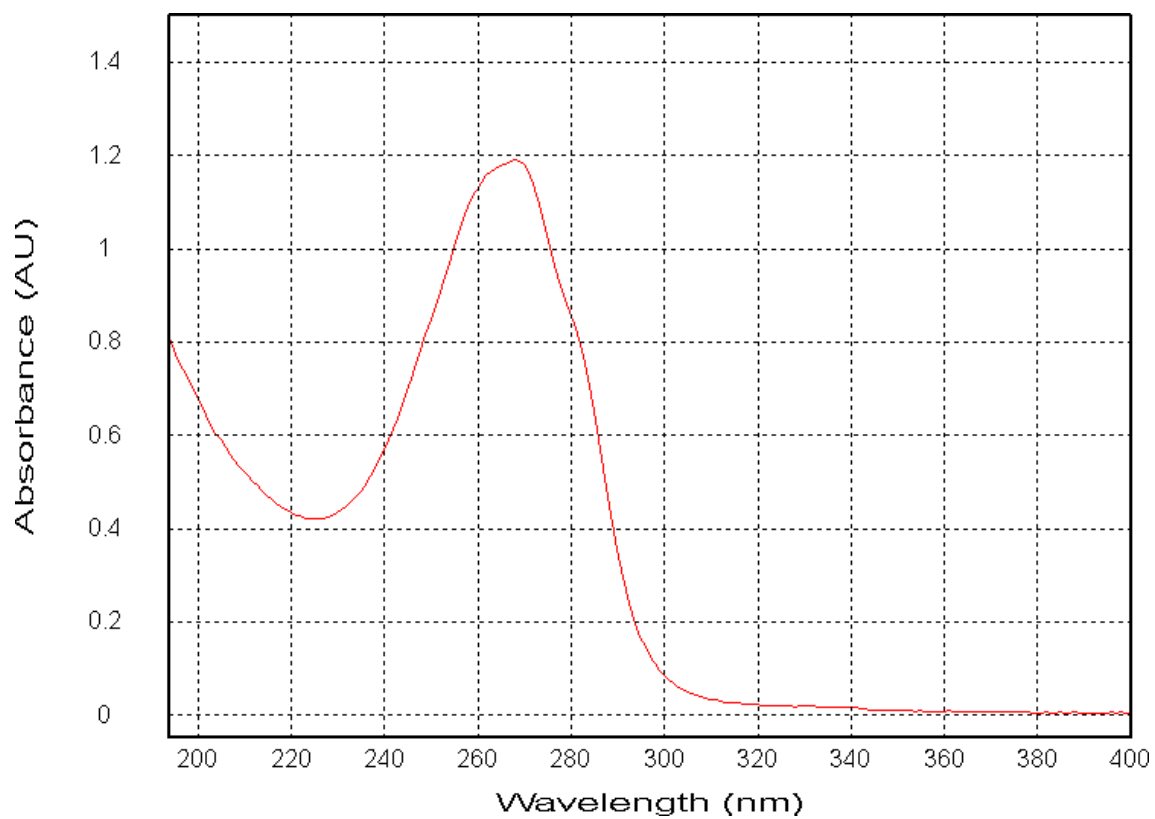

Figure S9. UV spectrum of **3**

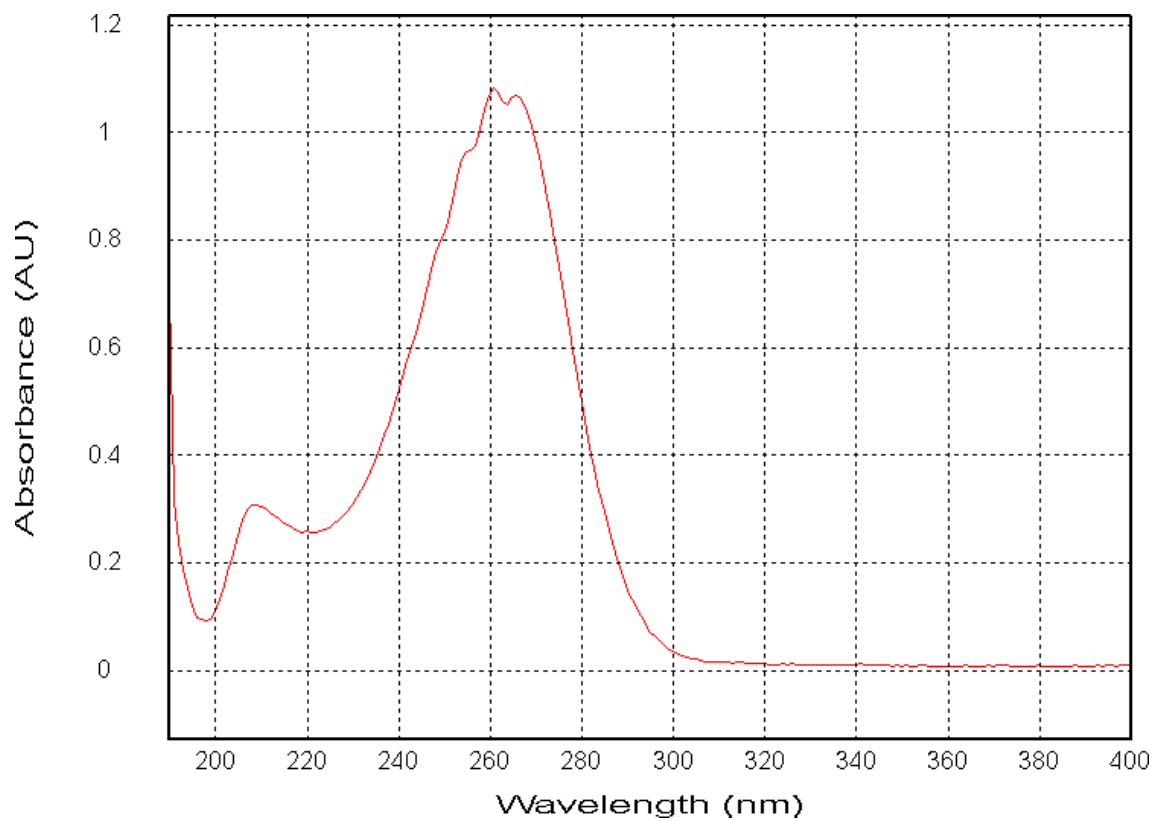

Figure S10. UV spectrum of **4**

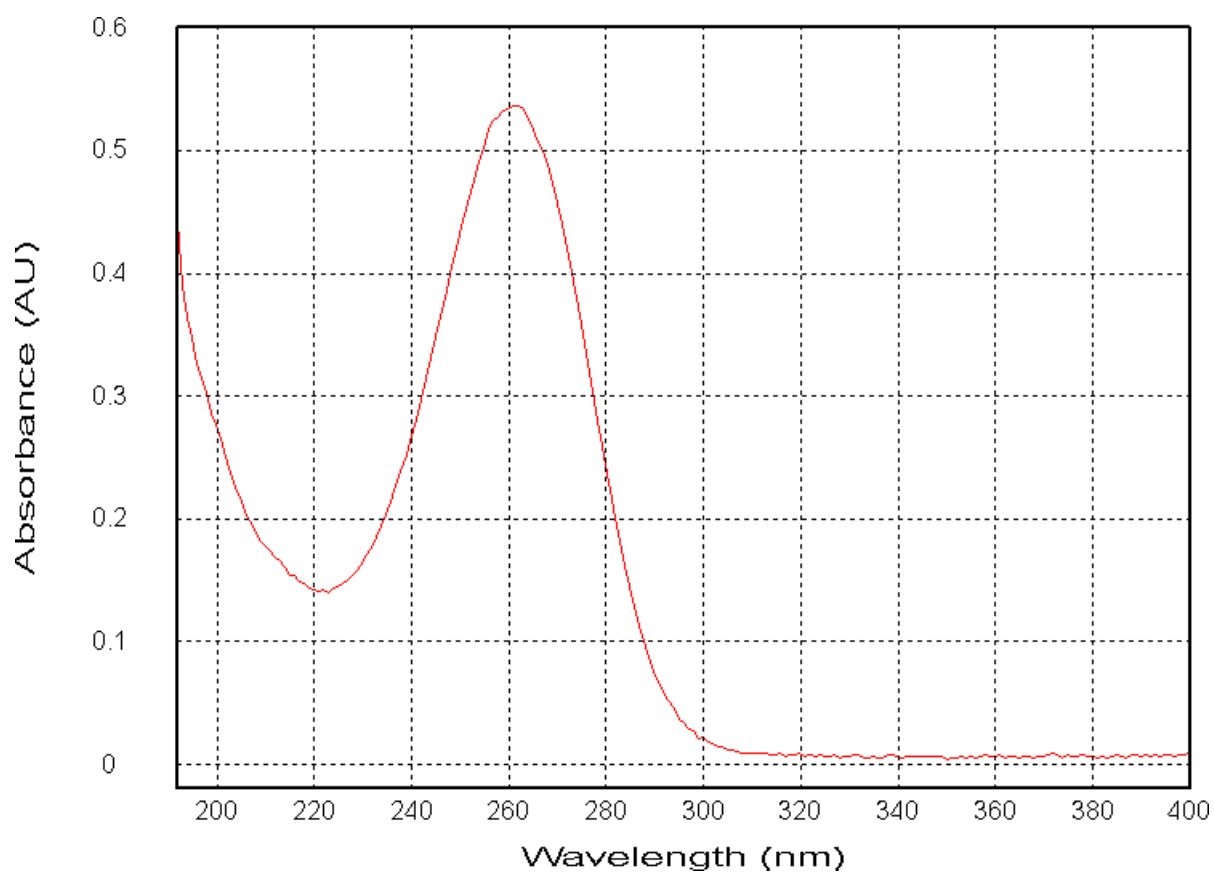

Figure S11. UV spectrum of **5**

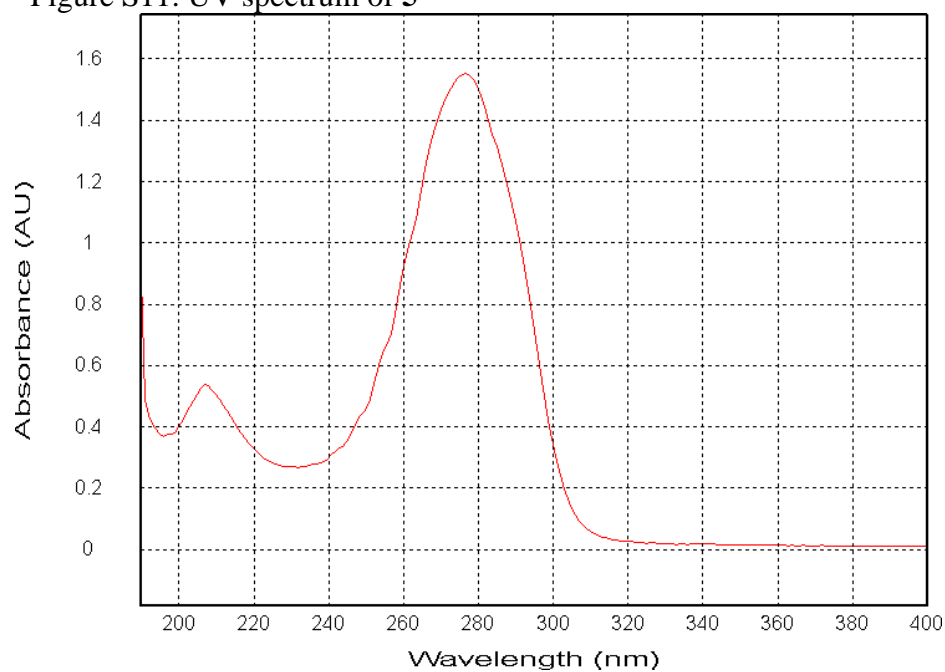

Figure S12. UV spectrum of **10**

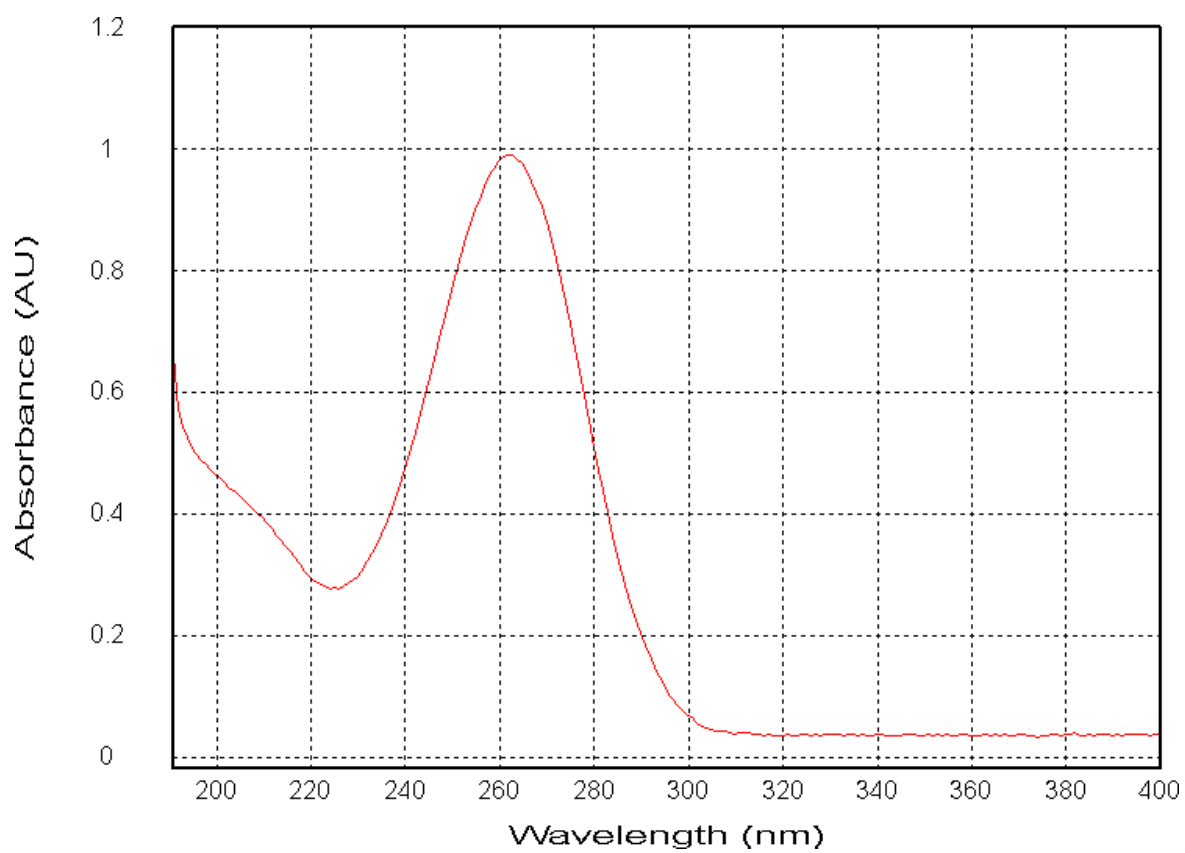

Figure S13. UV spectrum of **11**

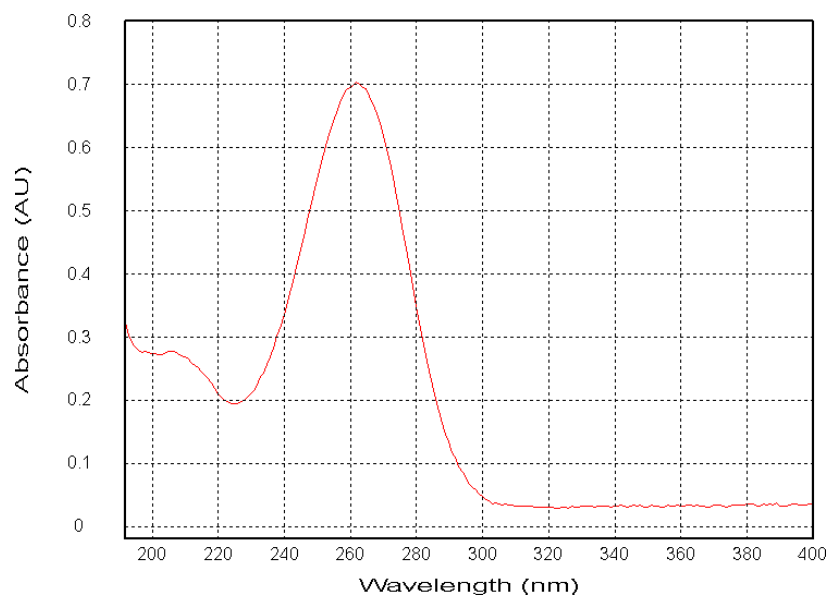

Figure S14. UV spectrum of **12**

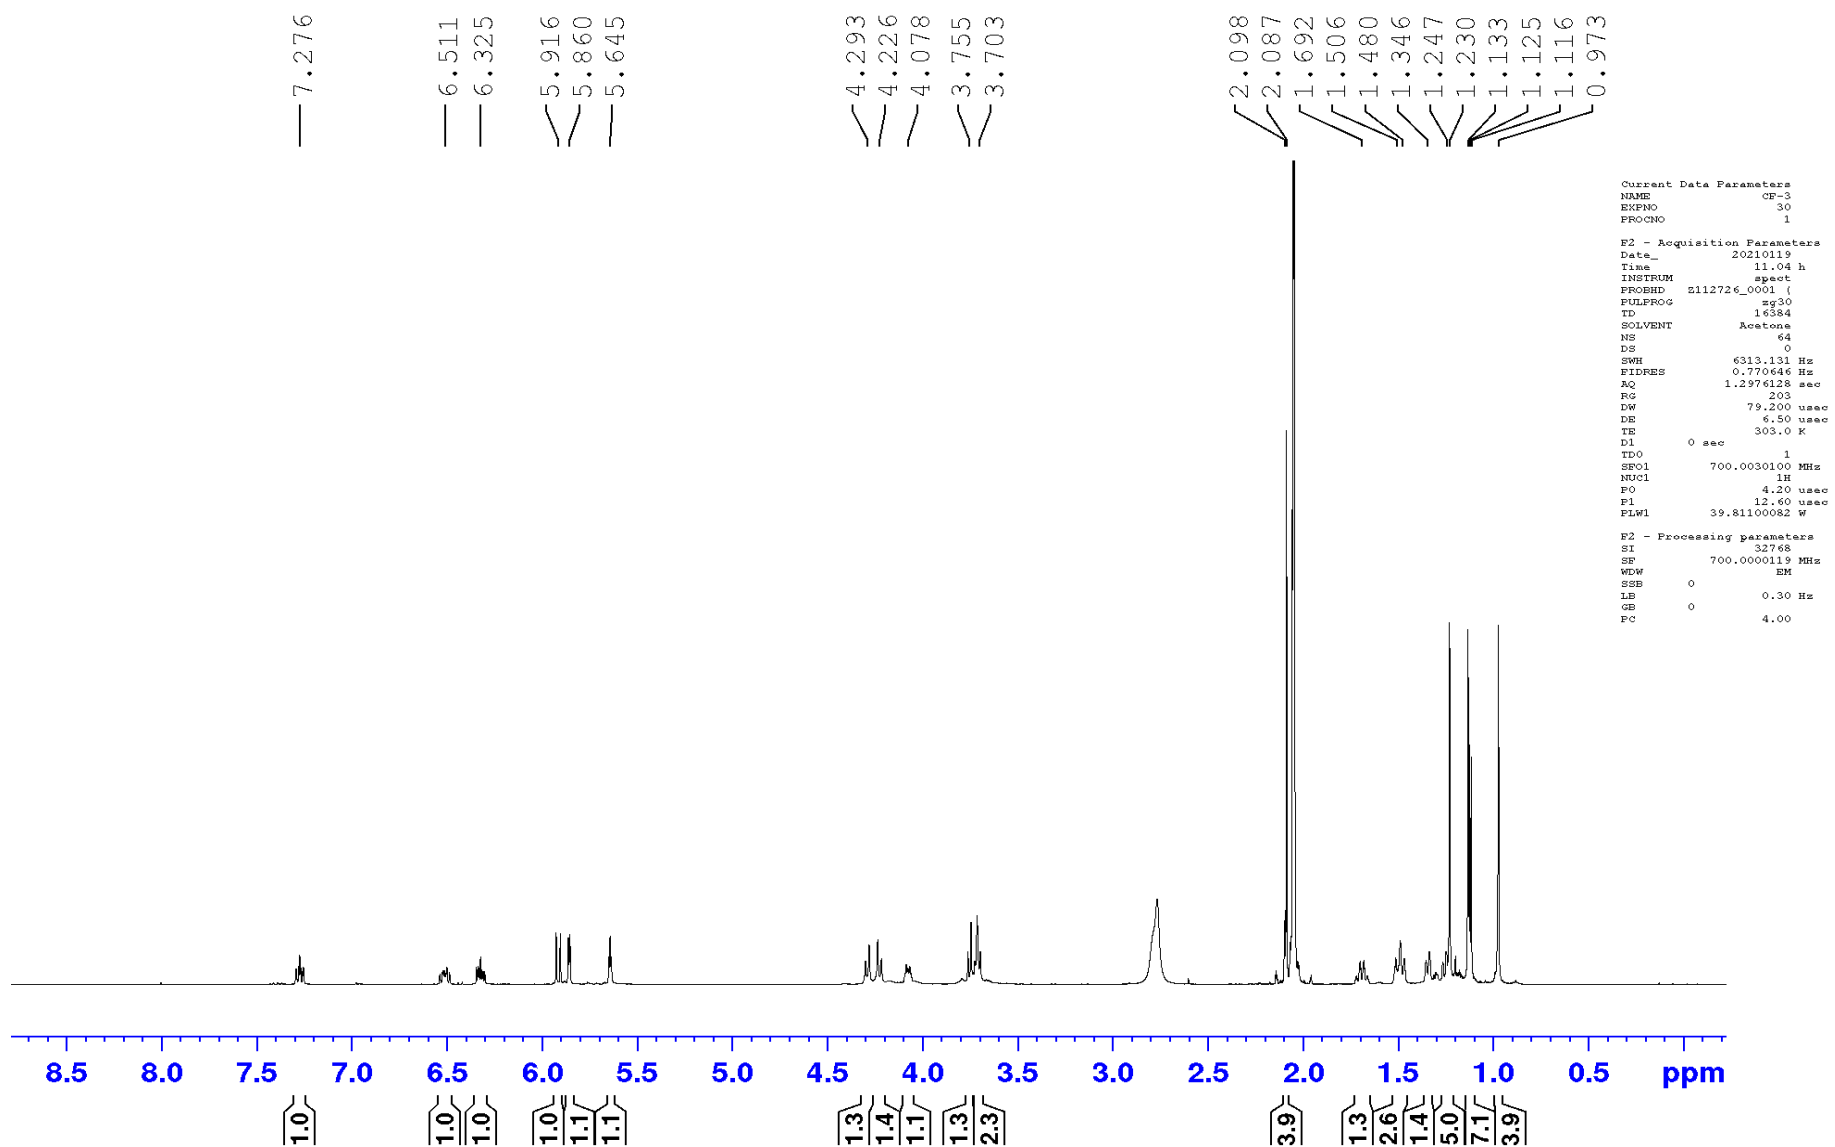

Figure S15.  $^1\text{H}$  NMR spectrum (700 MHz, acetone- $\text{d}_6$ ) of **1**

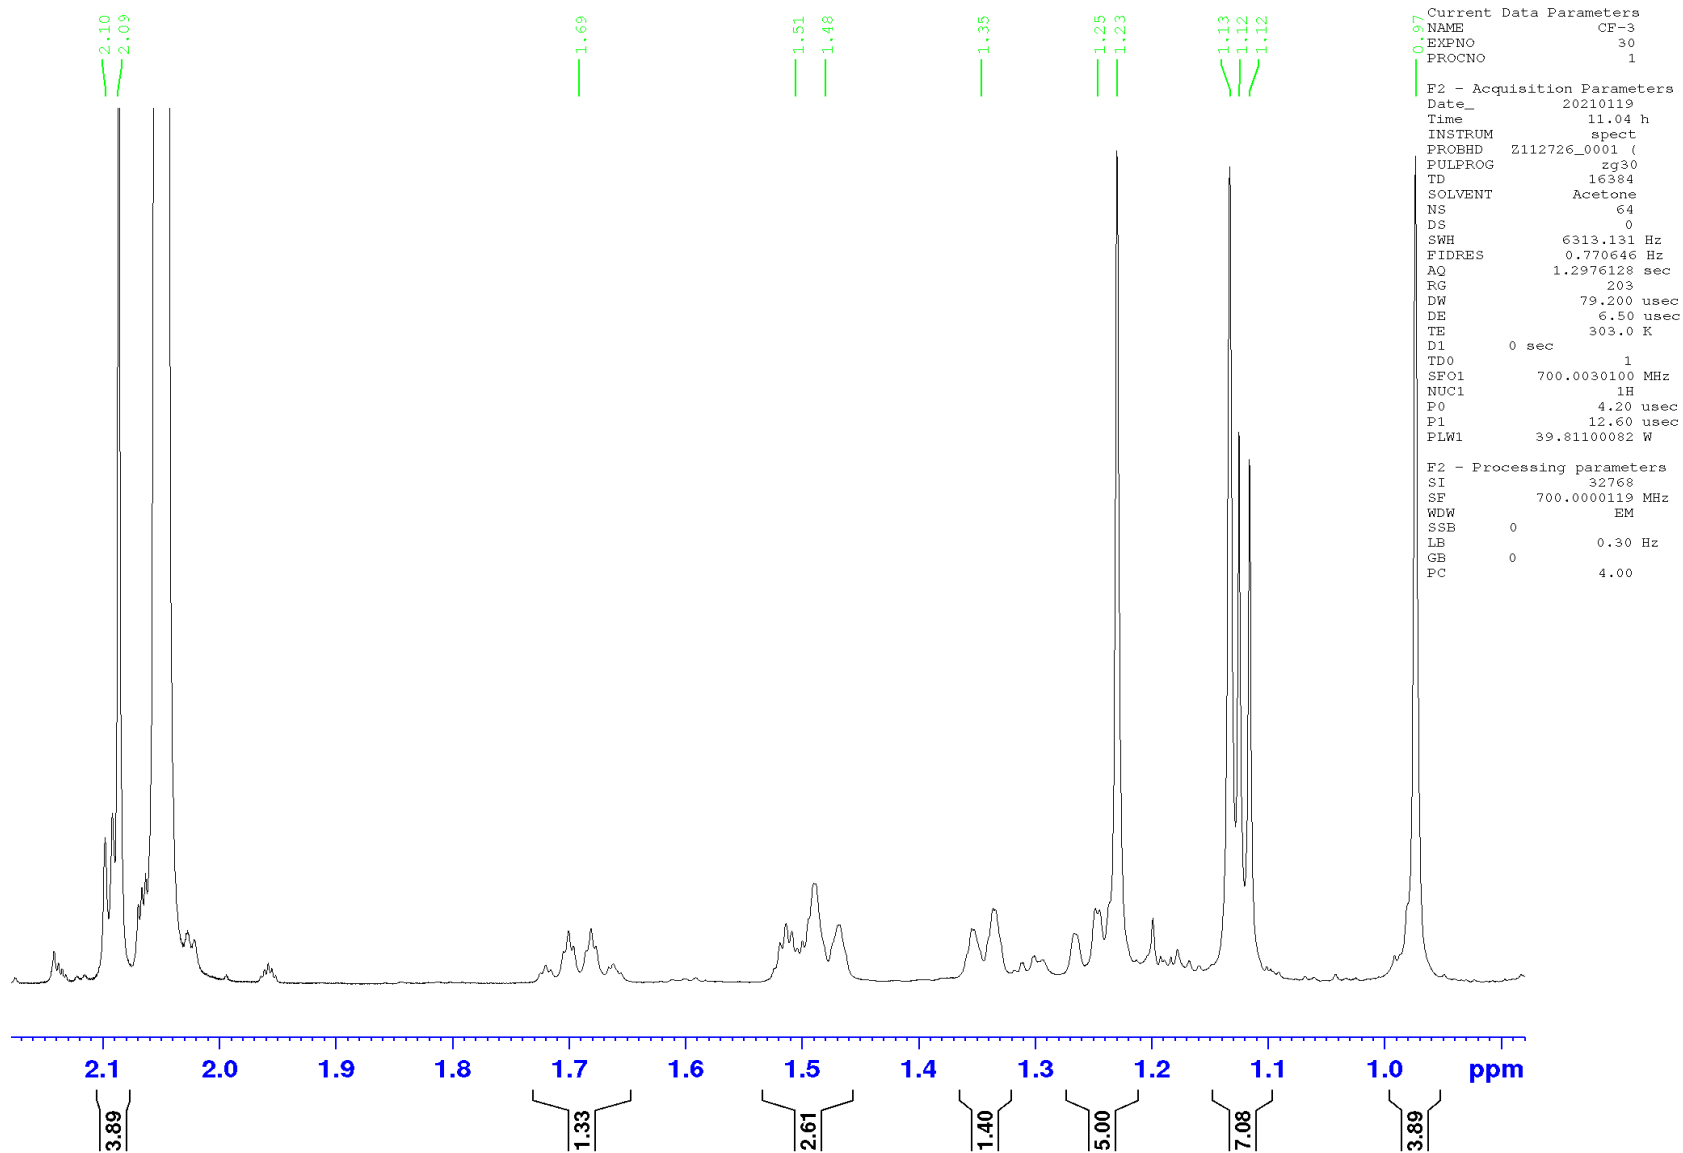

$^1\text{H}$  NMR spectrum (700 MHz, acetone- $\text{d}_6$ ) of **1**

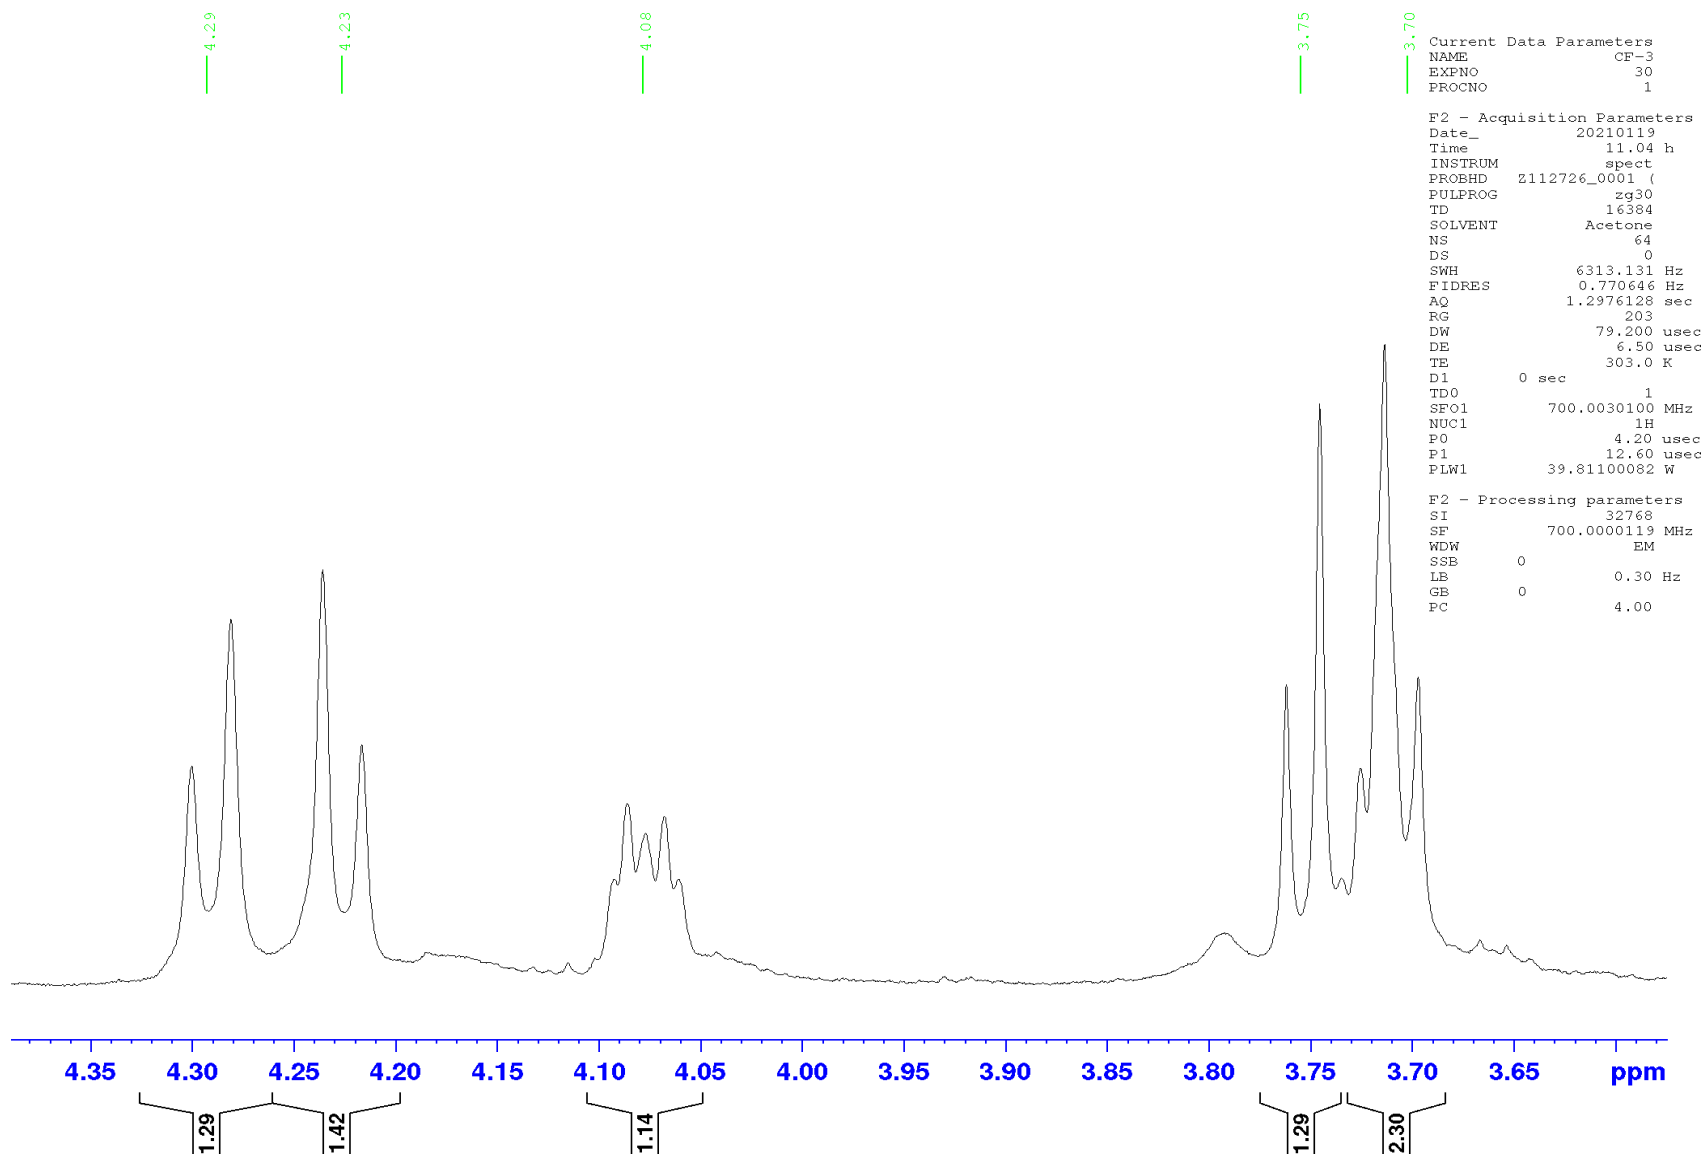

$^1\text{H}$  NMR spectrum (700 MHz, acetone- $\text{d}_6$ ) of **1**

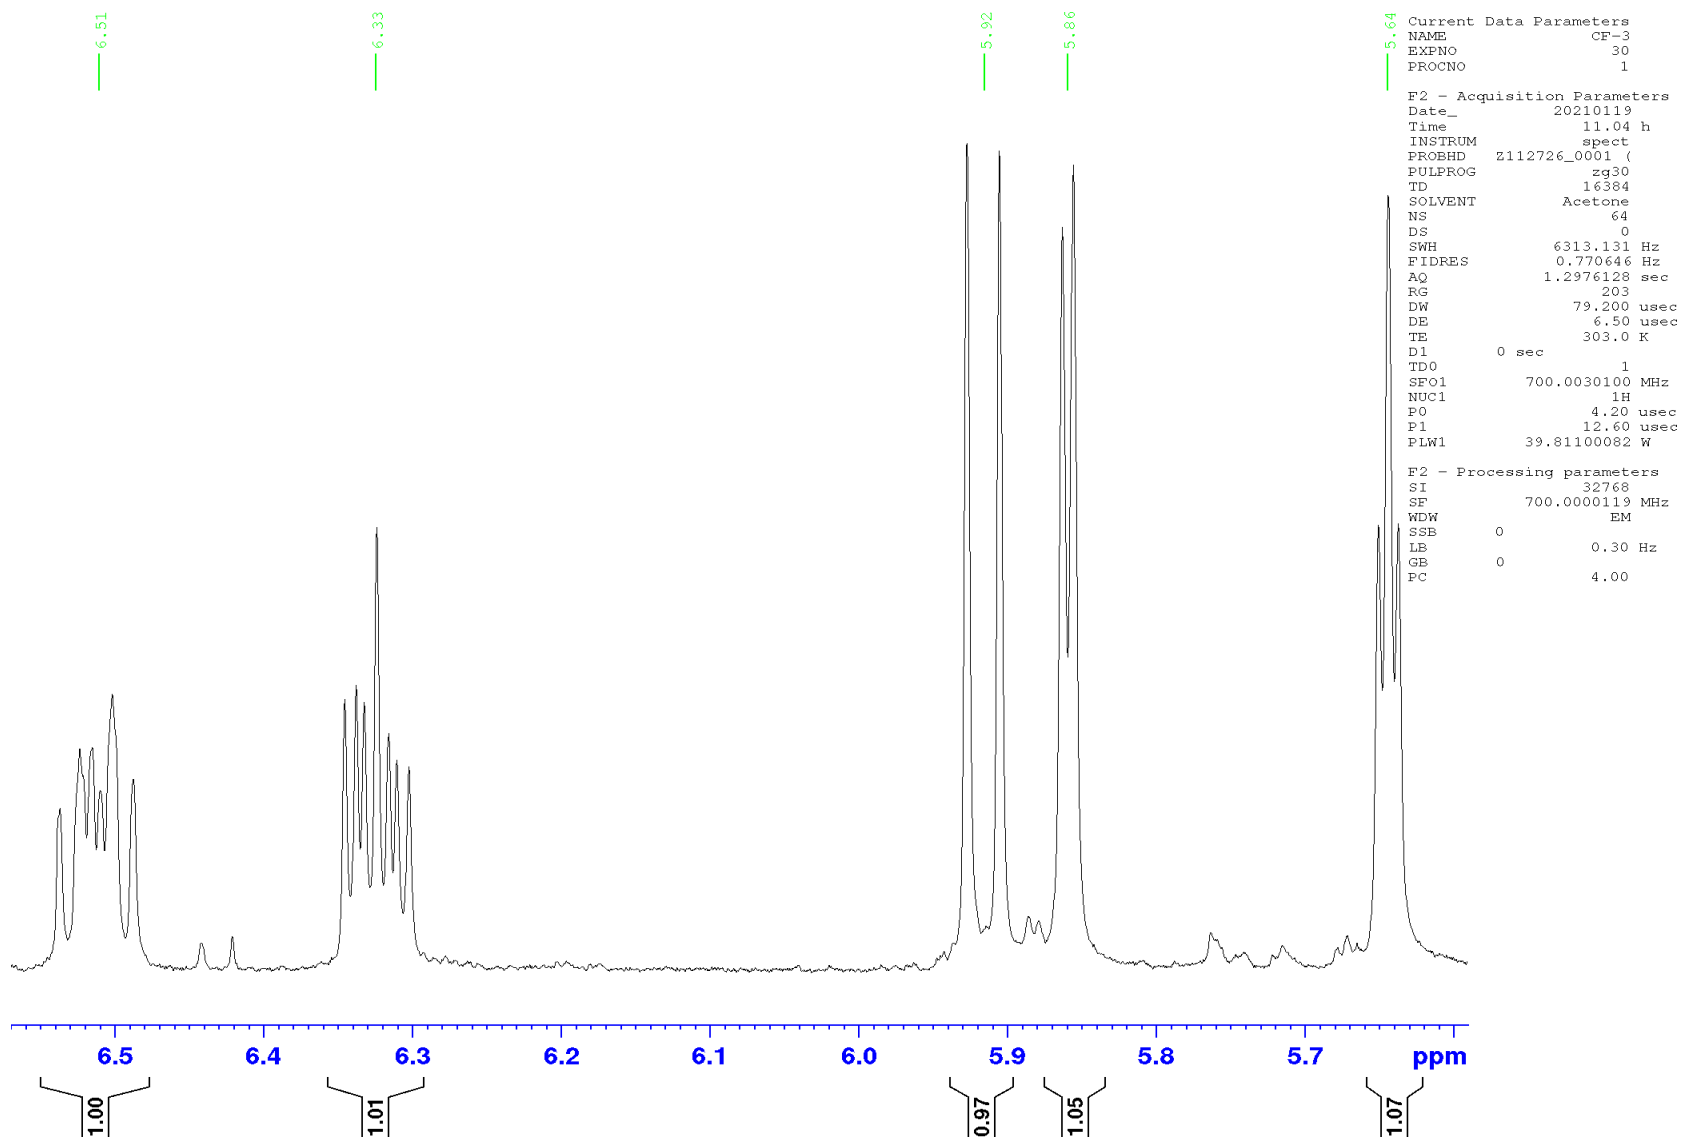

$^1\text{H}$  NMR spectrum (700 MHz, acetone- $\text{d}_6$ ) of **1**

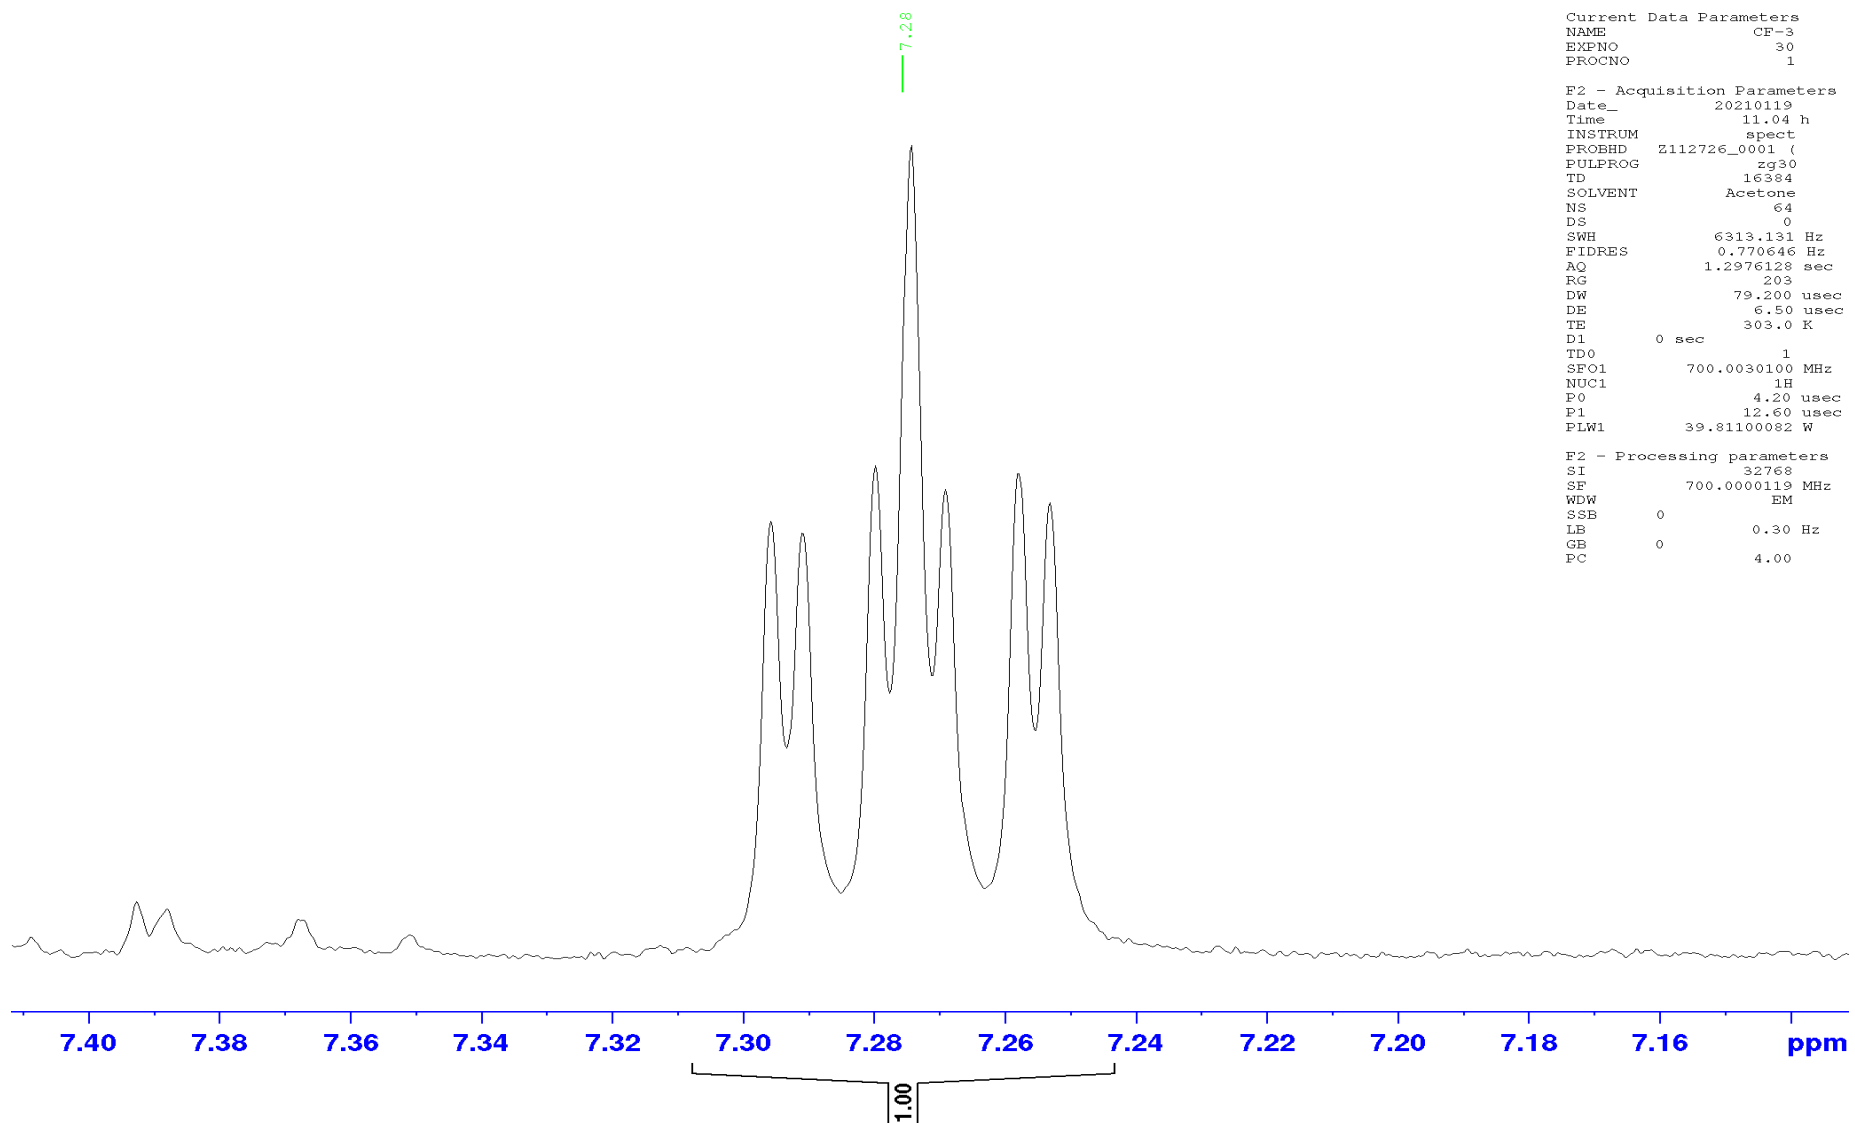

$^1\text{H}$  NMR spectrum (700 MHz, acetone- $\text{d}_6$ ) of **1**

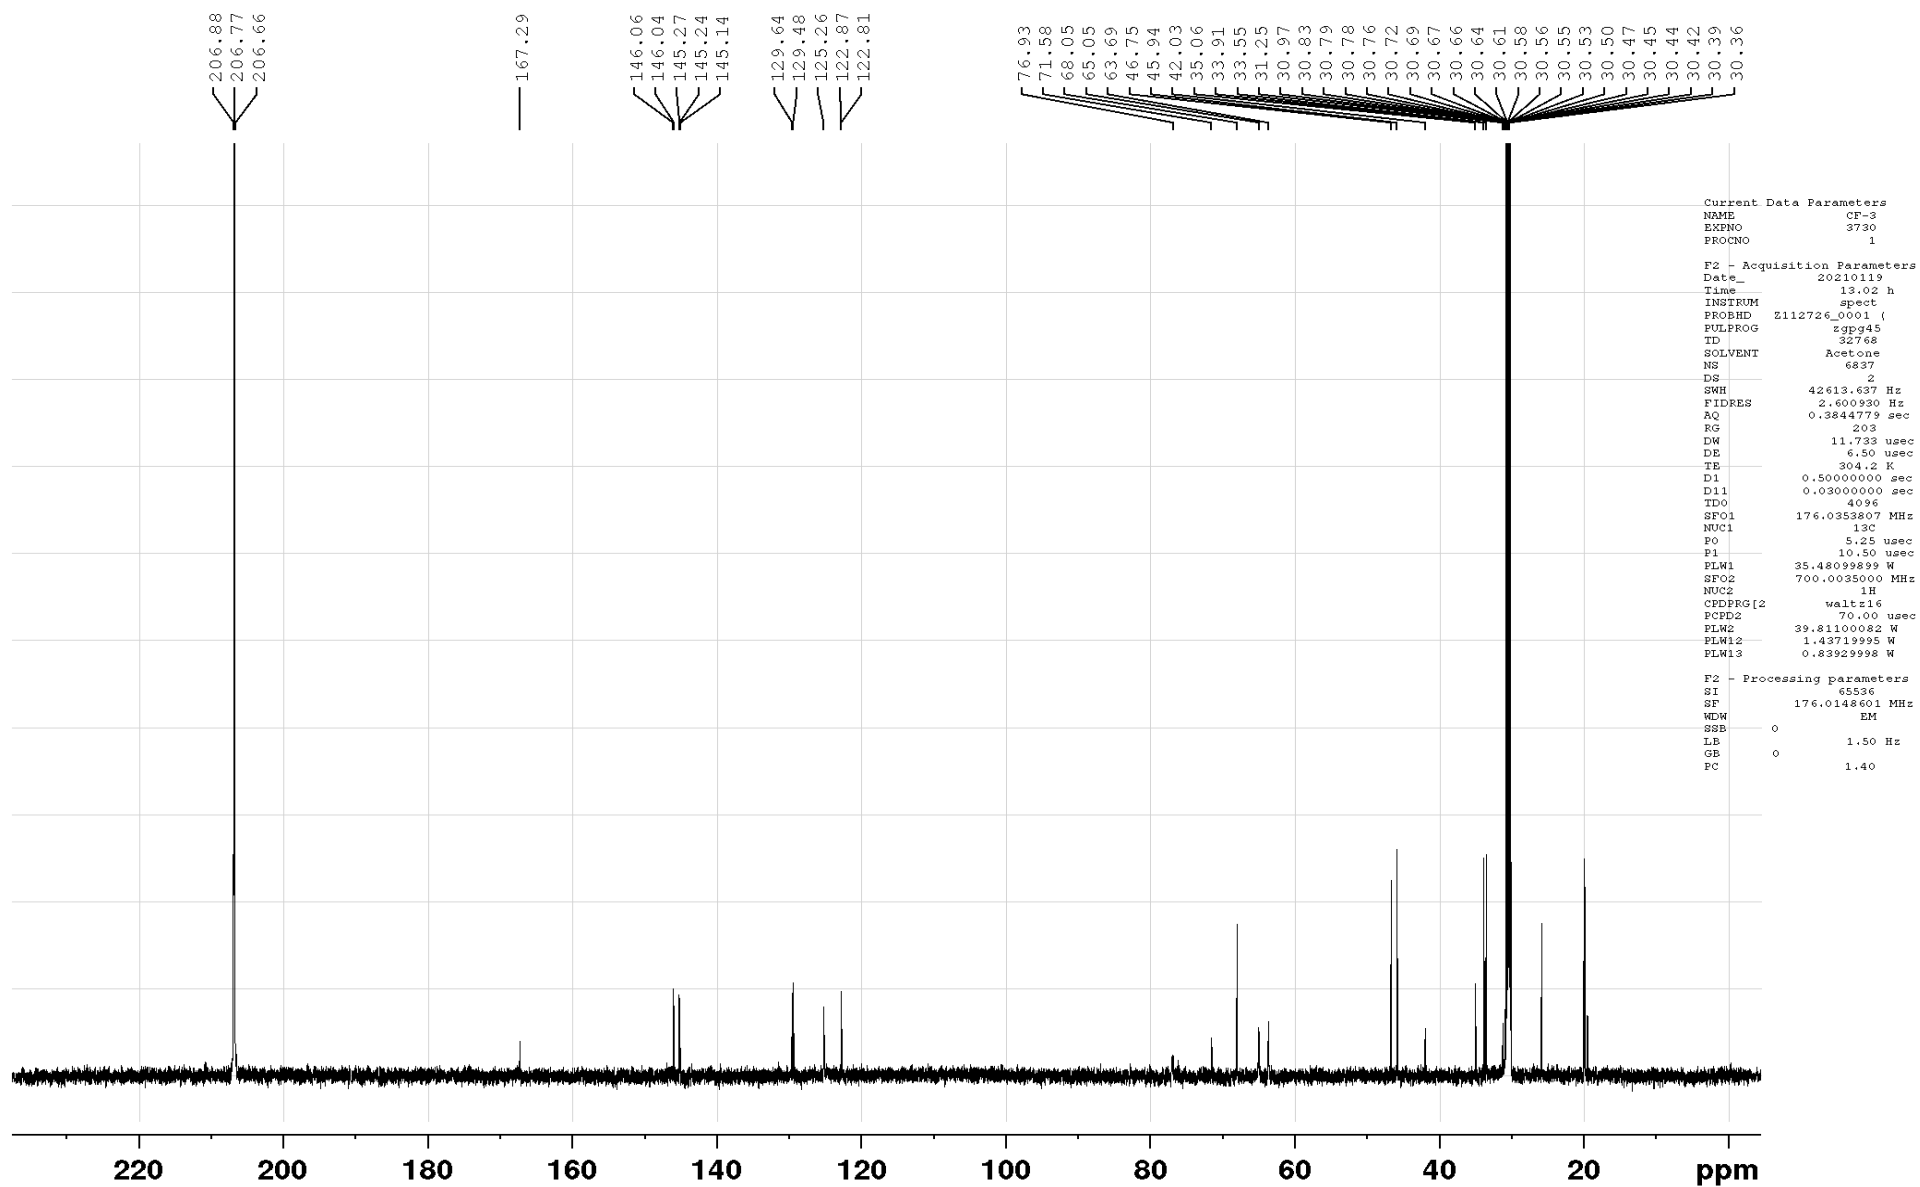

Figure S16.  $^{13}\text{C}$  NMR spectrum (175 MHz, acetone- $\text{d}_6$ ) of **1**

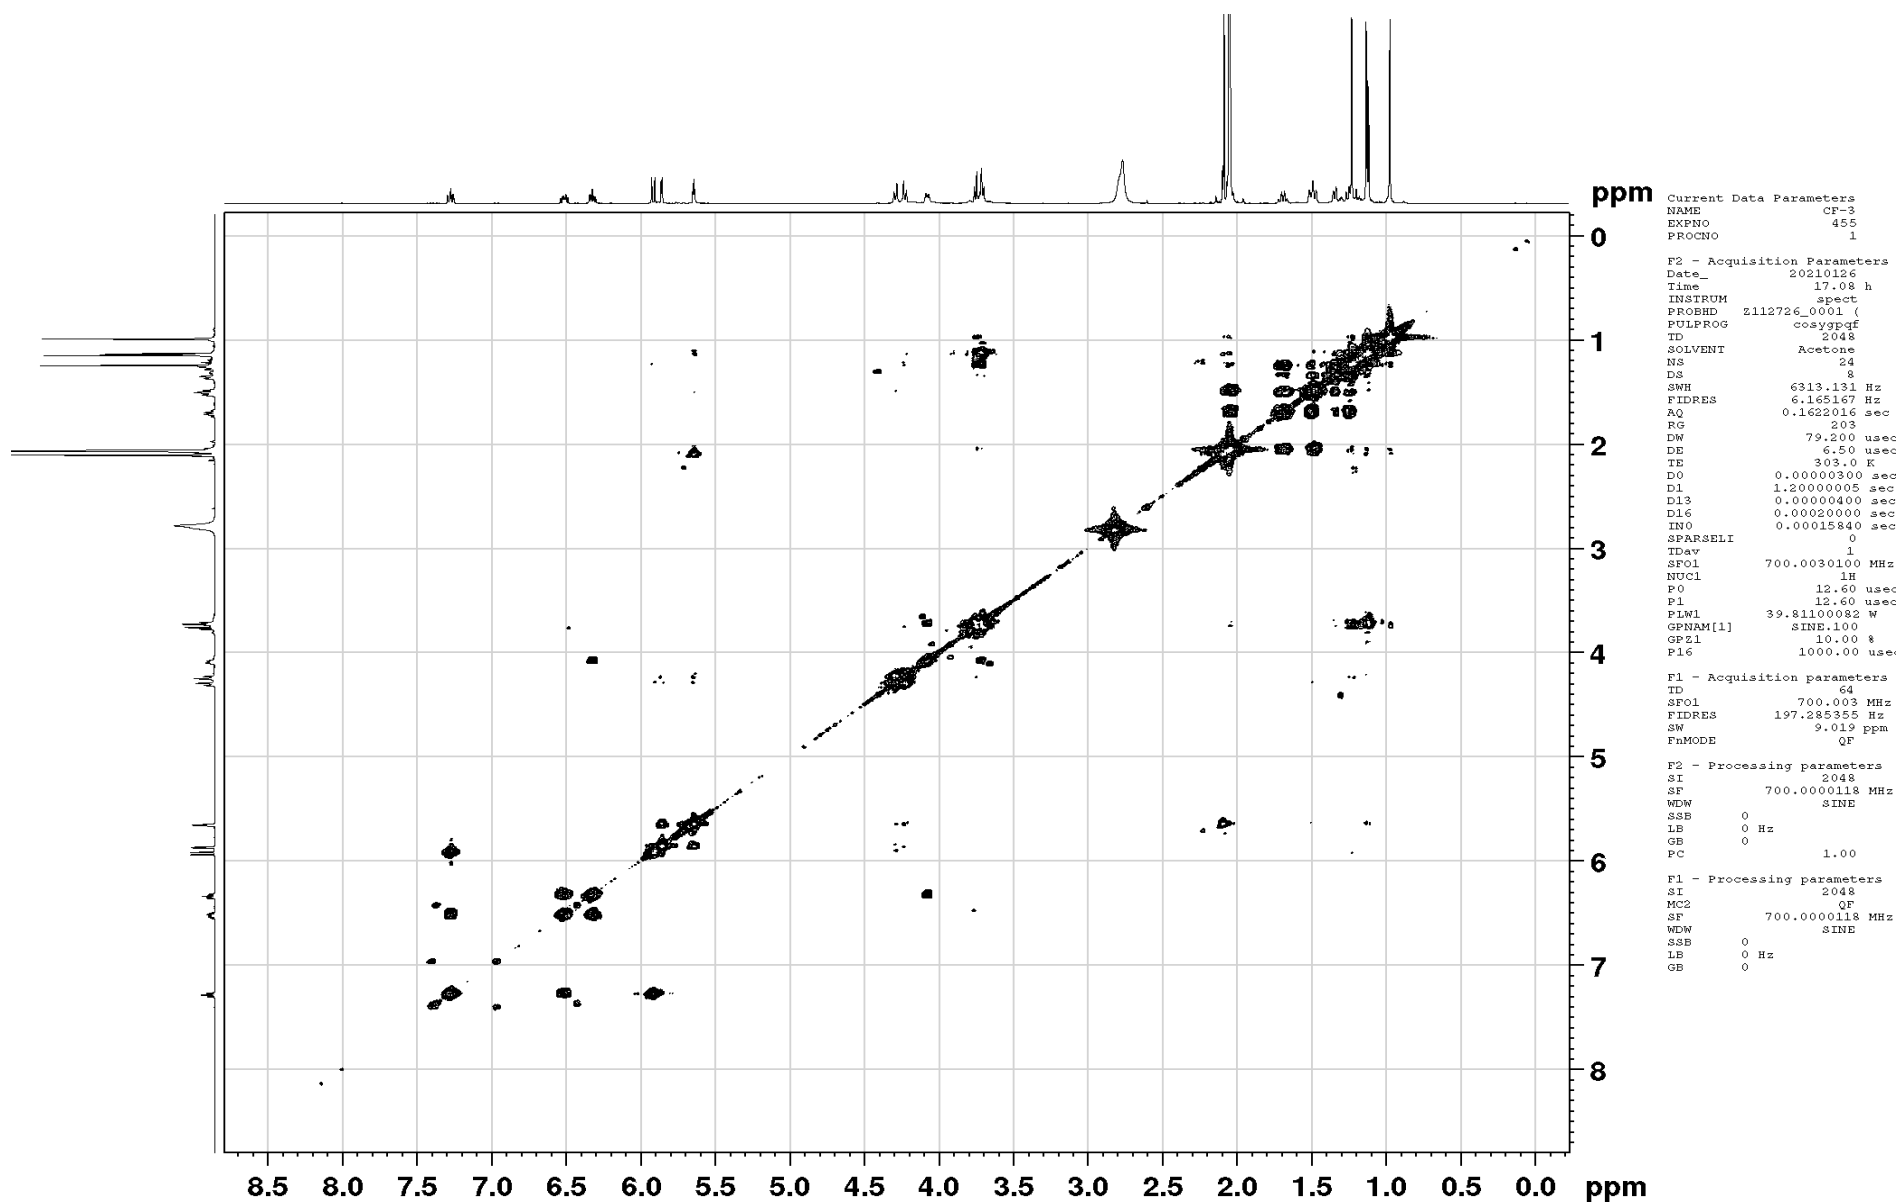

Figure S17. COSY-45 spectrum (700 MHz, acetone-d<sub>6</sub>) of **1**

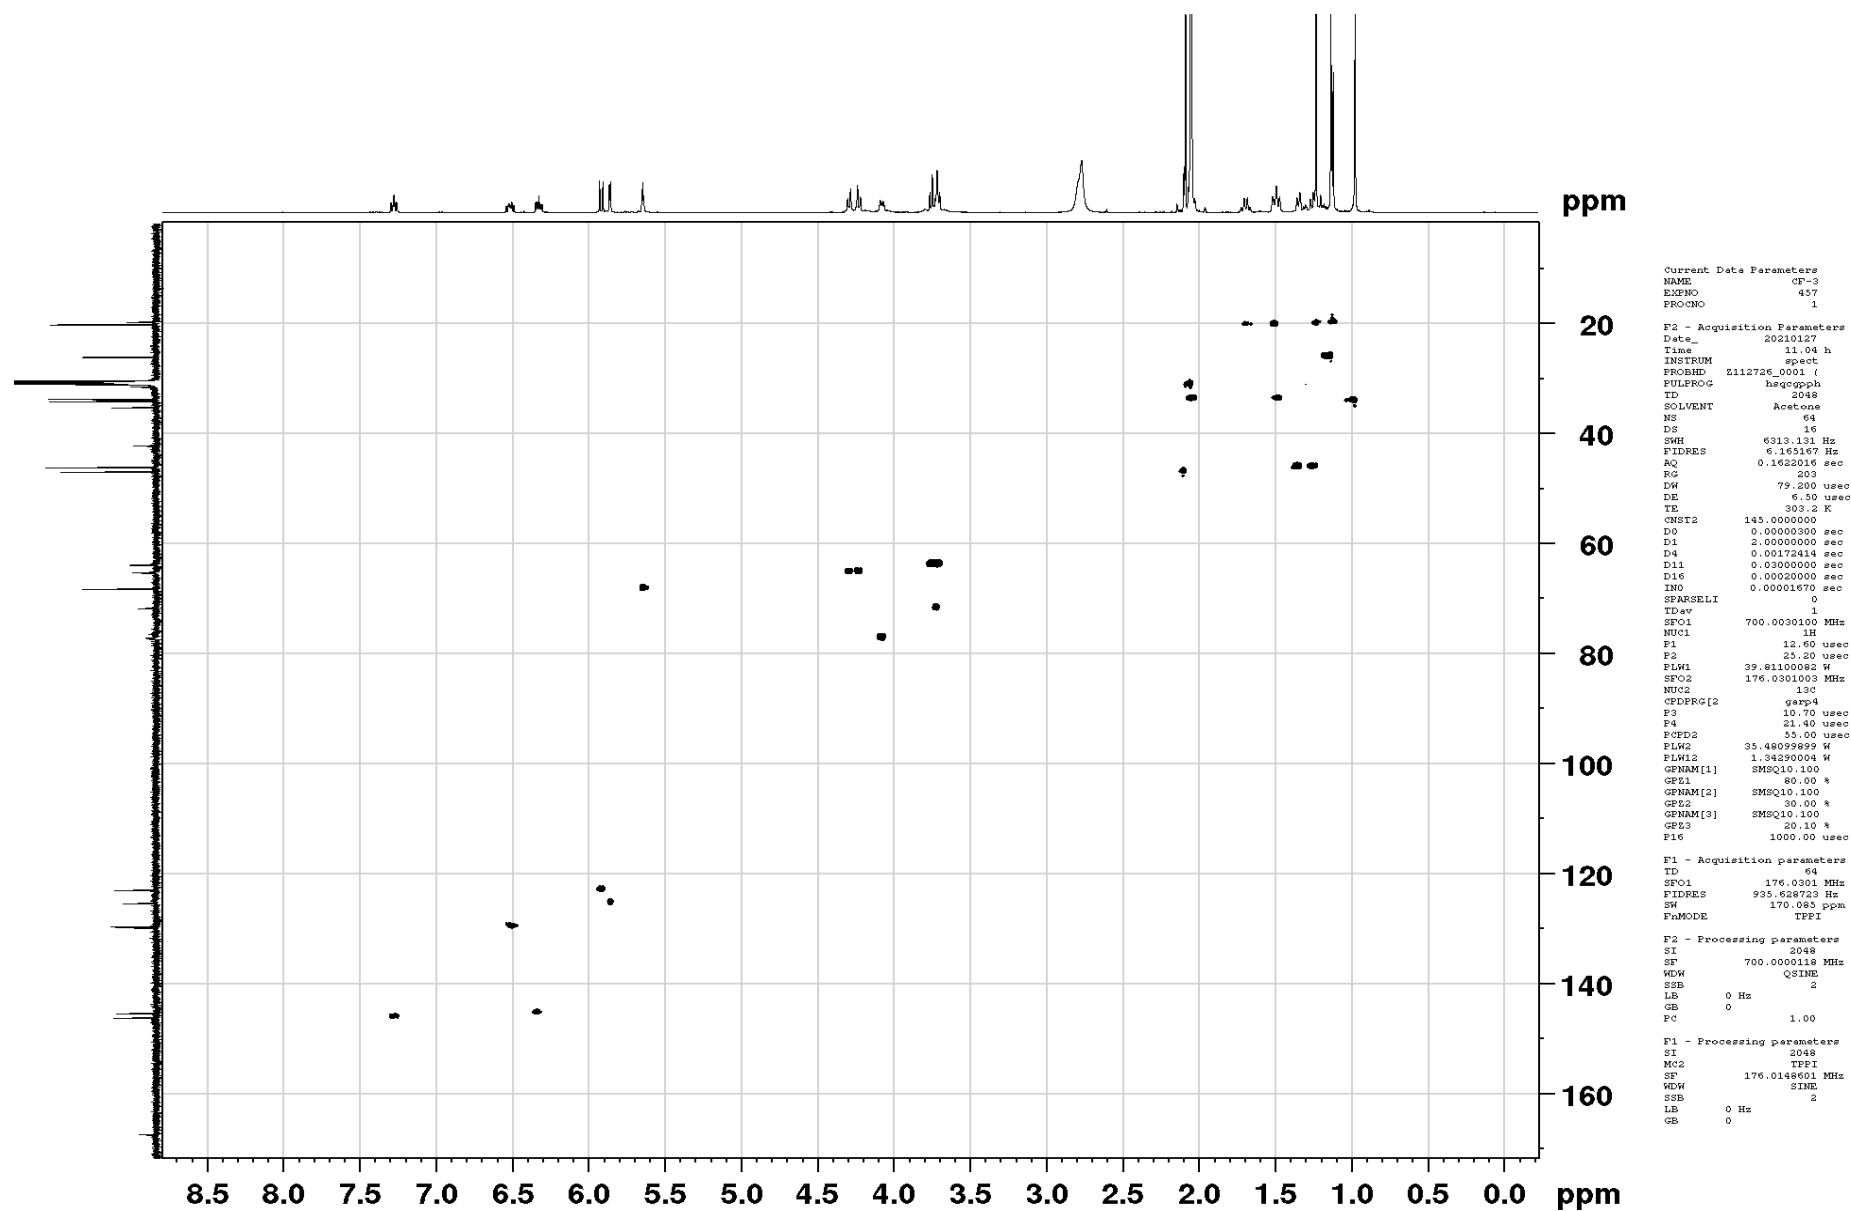

Figure S18. HSQC spectrum (700 MHz, acetone- $d_6$ ) of **1**

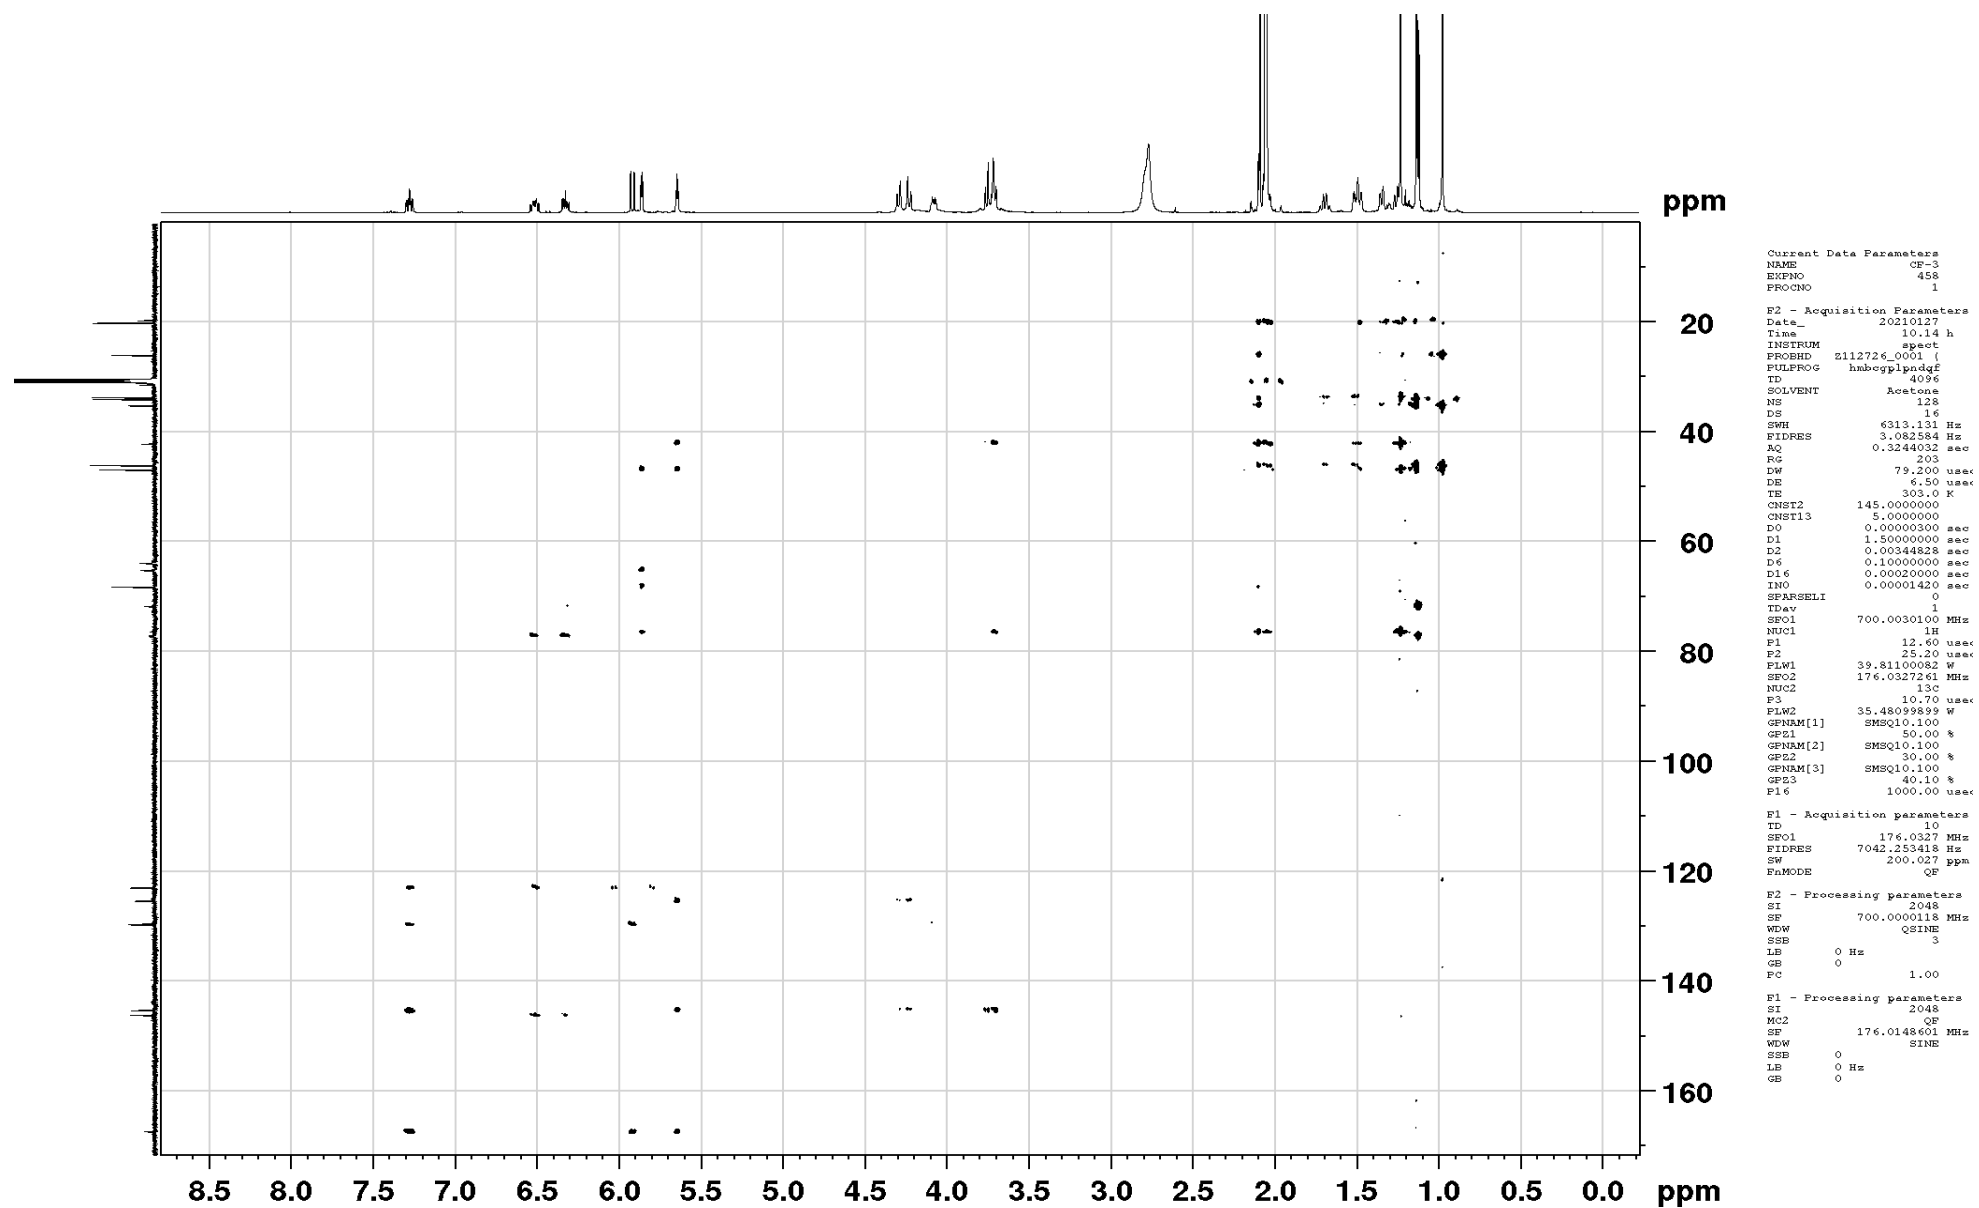

Figure S19. HMBC spectrum (700 MHz, acetone-d<sub>6</sub>) of **1**

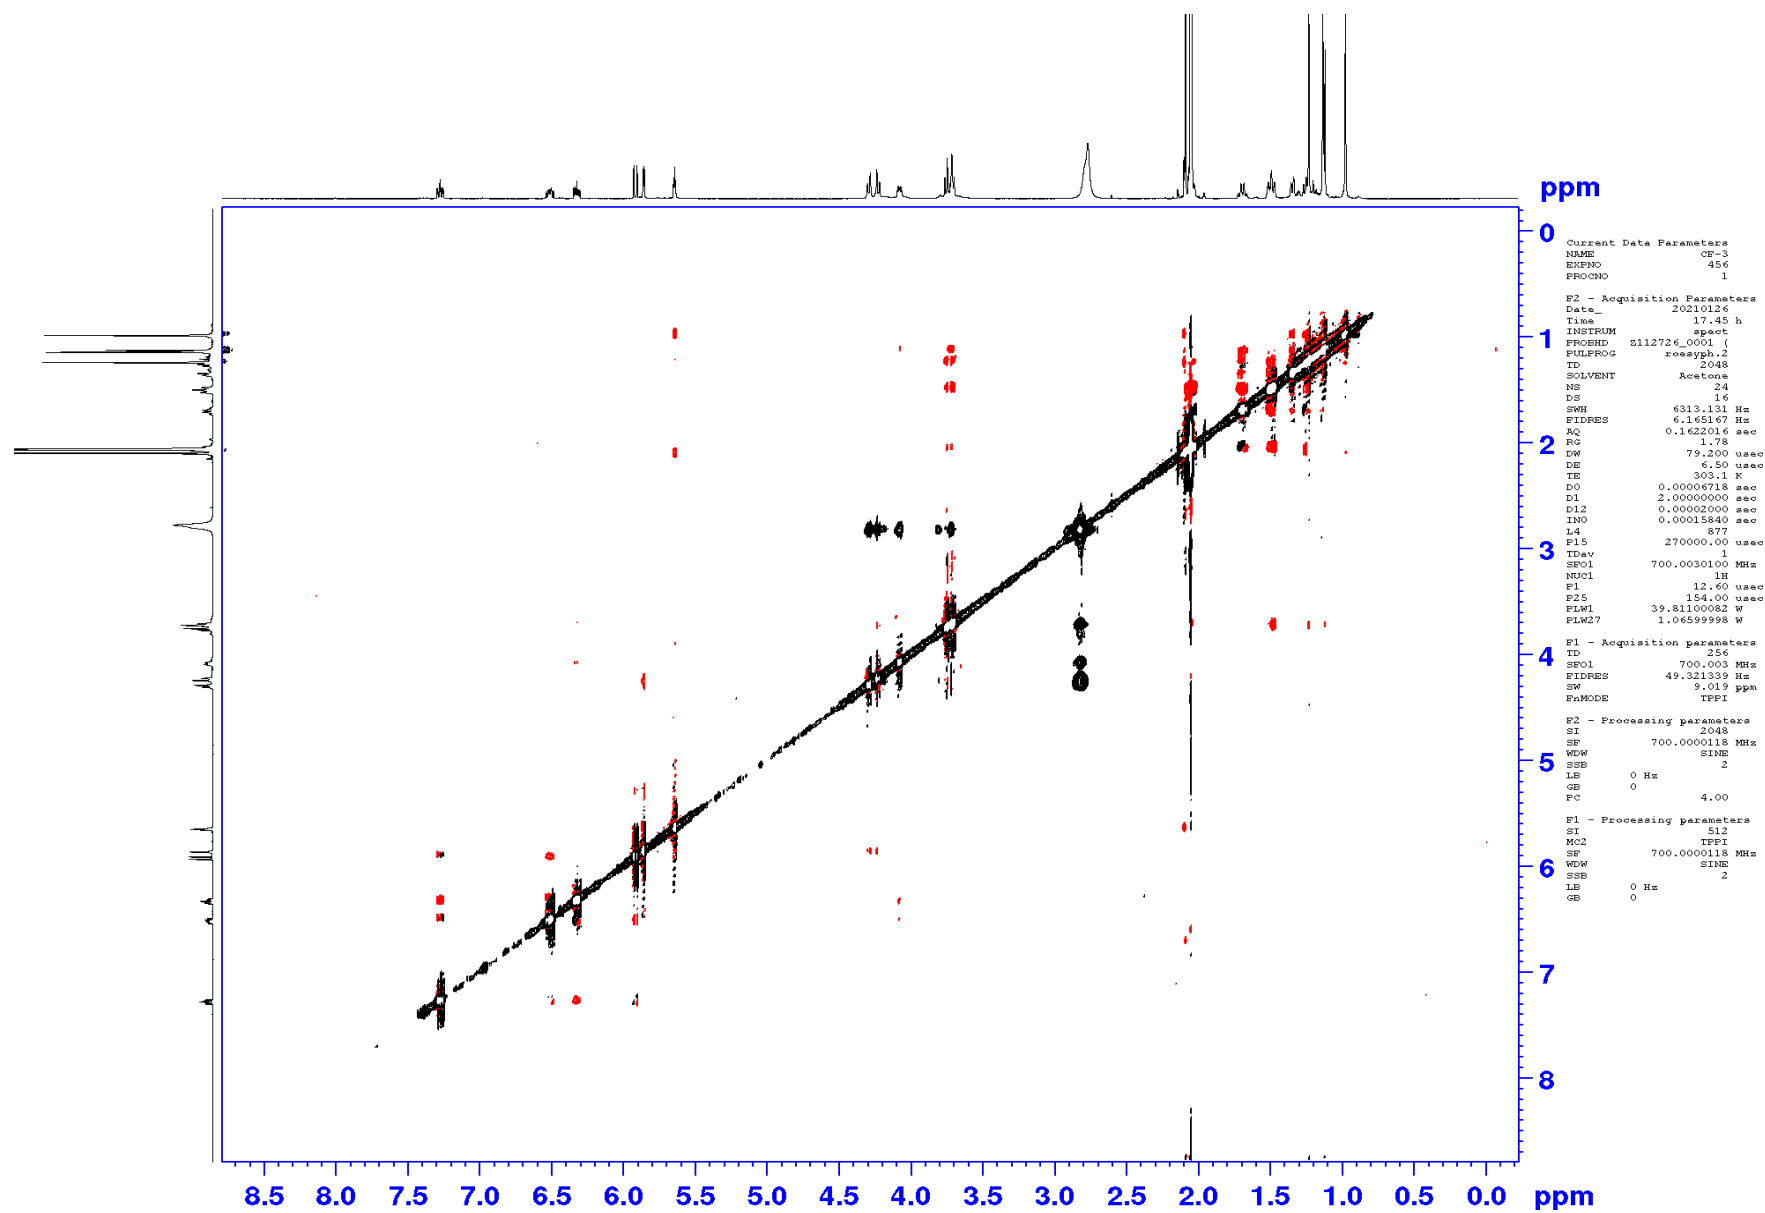

Figure S20. ROESY spectrum (700 MHz, acetone- $d_6$ ) of **1**

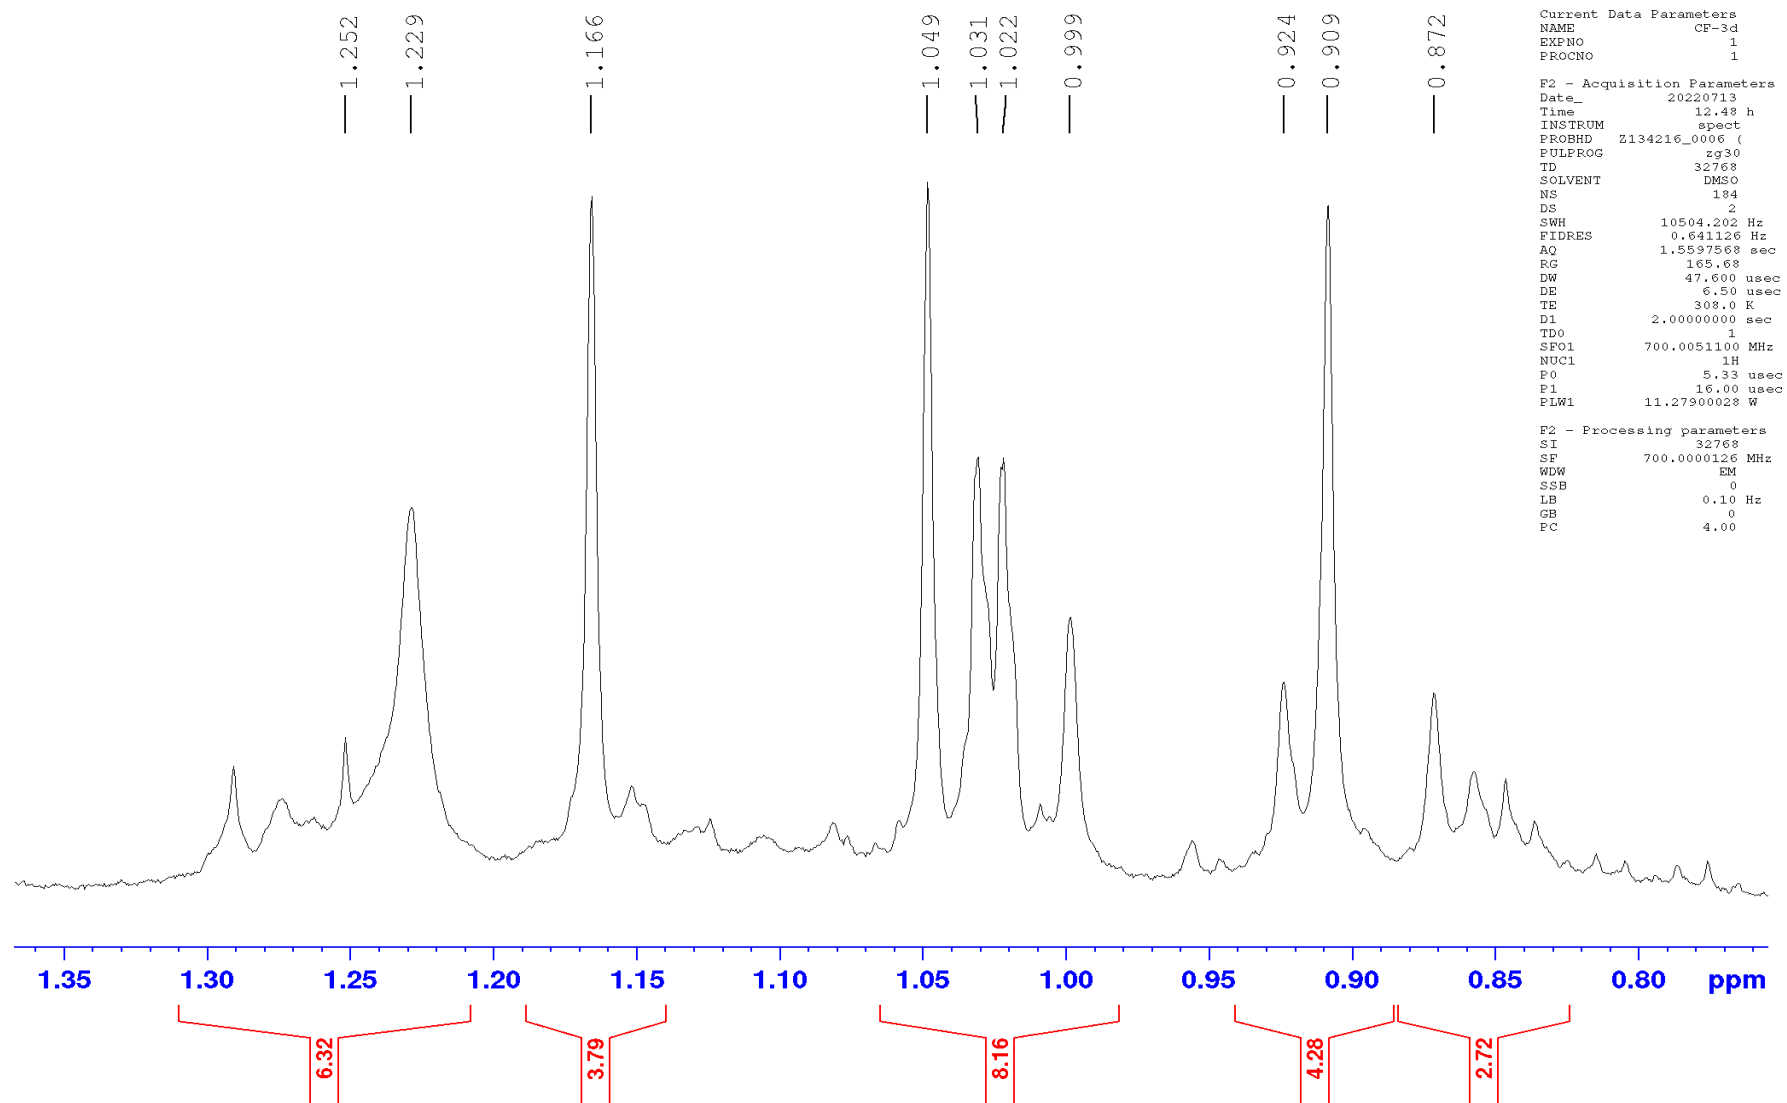

Figure S21. Expanded  $^1\text{H}$  NMR spectrum (700 MHz, DMSO- $\text{d}_6$ ) of **1**

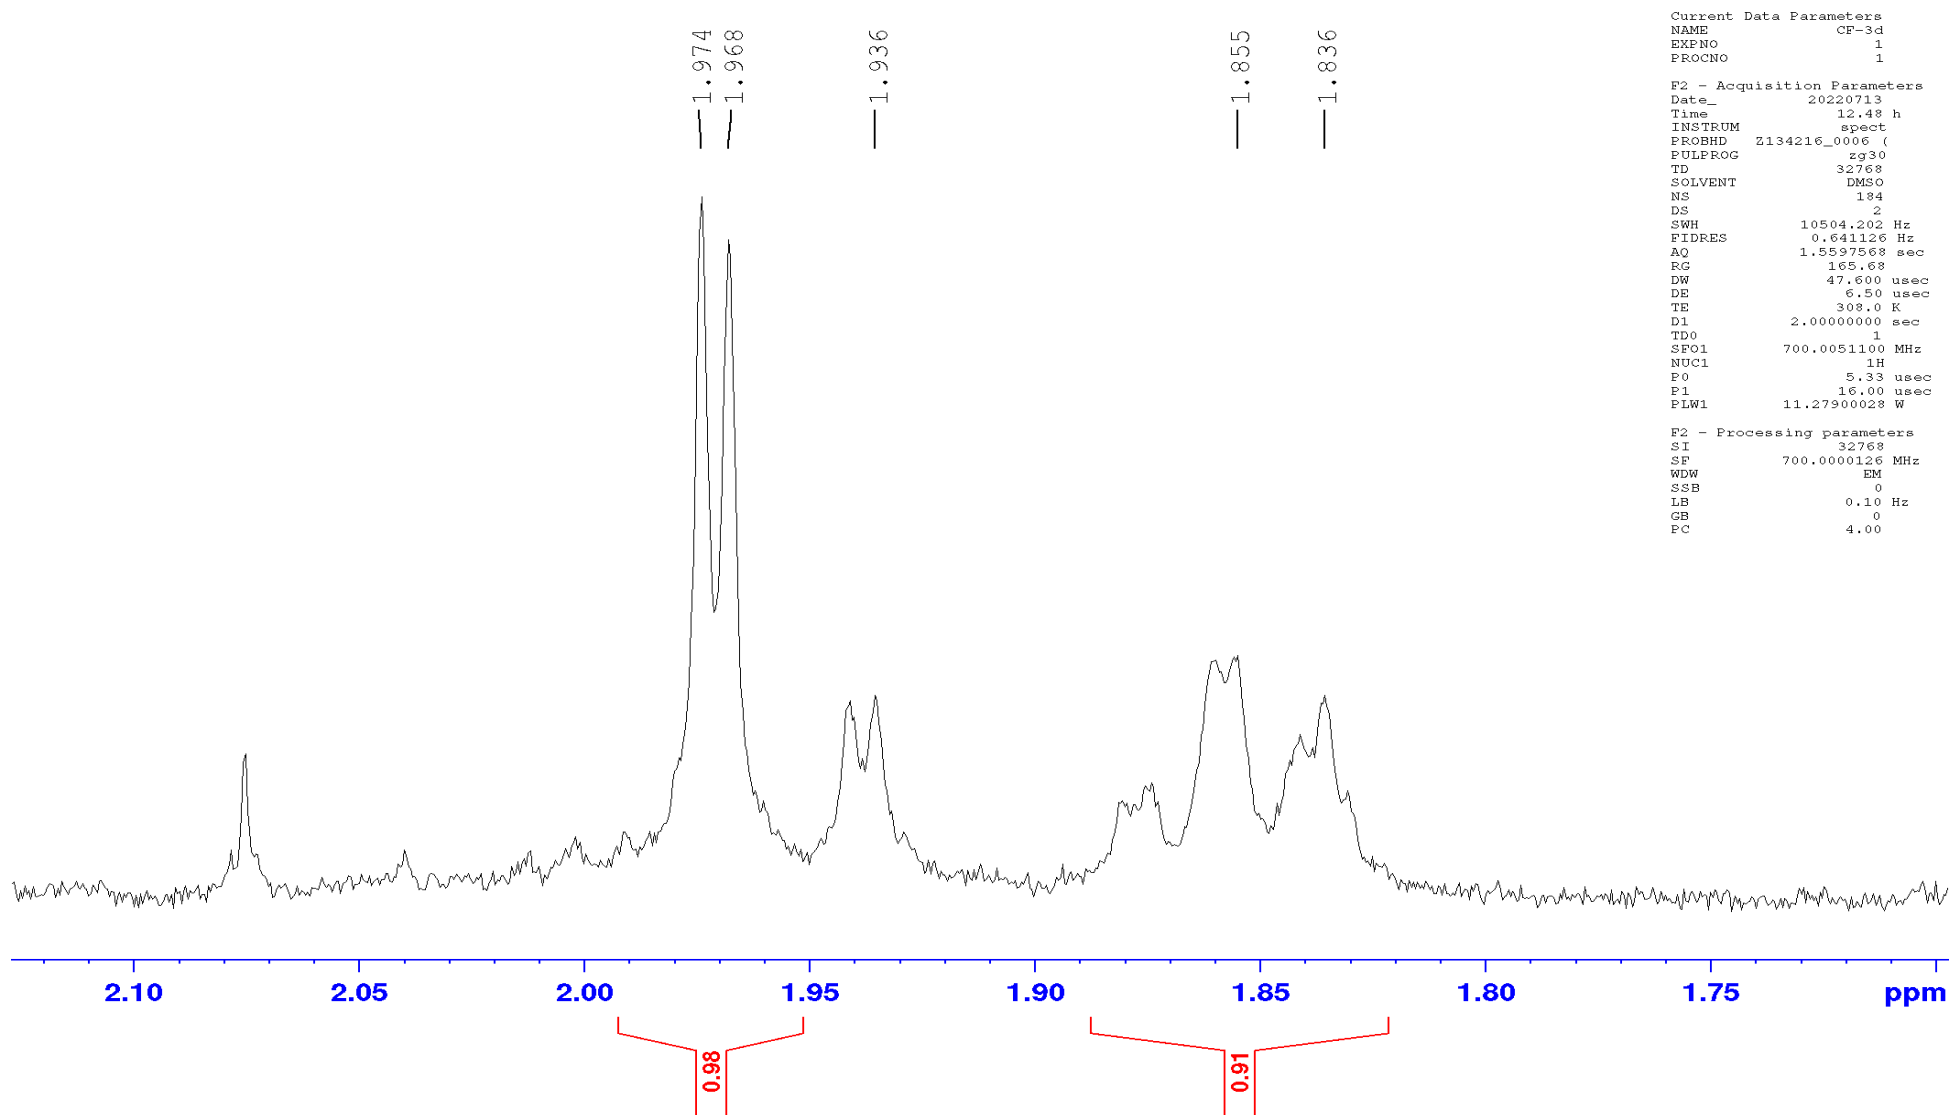

Expanded  $^1\text{H}$  NMR spectrum (700 MHz,  $\text{DMSO-d}_6$ ) of **1**

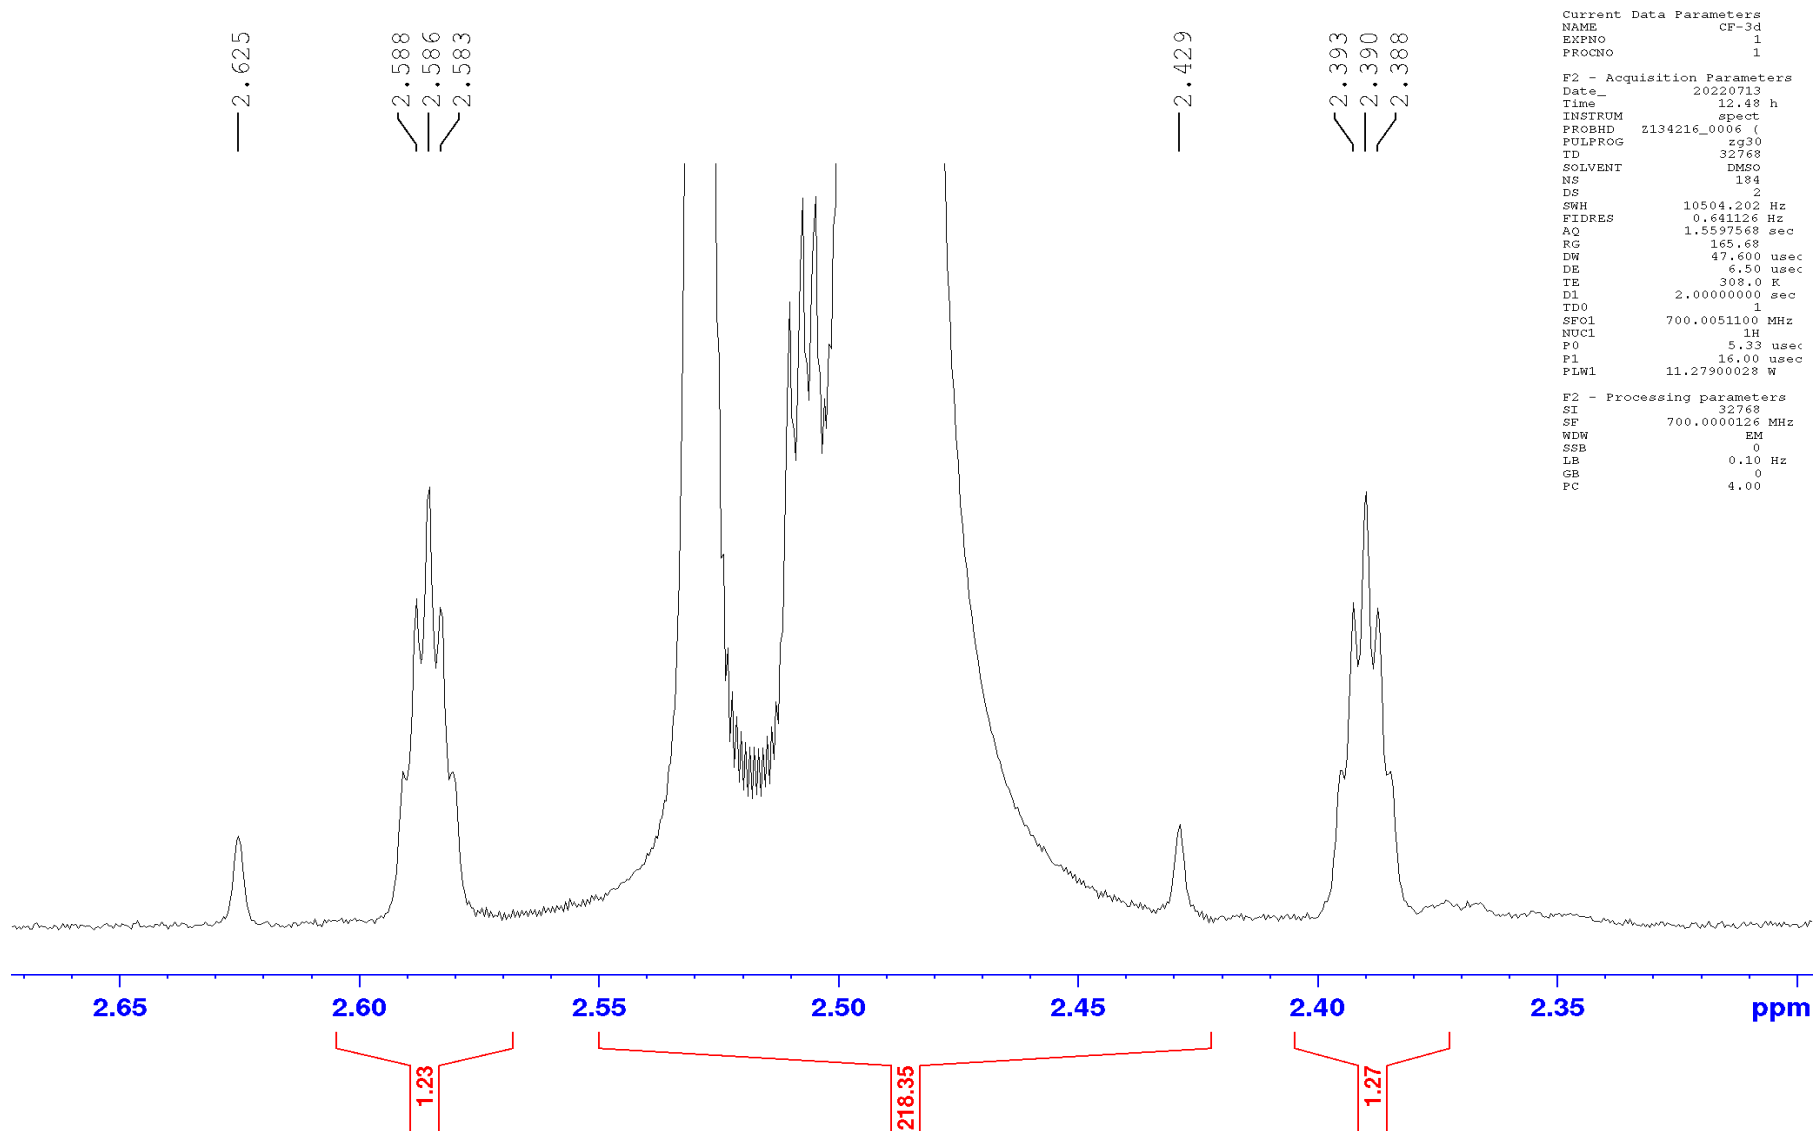

```

Current Data Parameters
NAME          CF-3d
EXPNO         1
PROCNO        1

F2 - Acquisition Parameters
Date_         20220713
Time          12.48 h
INSTRUM       spect
PROBHD        Z134216_0006 (
PULPROG       zg30
TD            32768
SOLVENT       DMSO
NS            184
DS            2
SWH           10504.202 Hz
FIDRES        0.641126 Hz
AQ            1.5597568 sec
RG            165.68
DM            47.600 usec
DE            6.50 usec
TE            308.0 K
D1            2.00000000 sec
TD0           1
SF01          700.0051100 MHz
NUC1          1H
P0            5.33 usec
P1            16.00 usec
PLW1          11.27900028 W

F2 - Processing parameters
SI            32768
SF            700.0000126 MHz
WDW           EM
SSB           0
LB            0.10 Hz
GB            0
PC            4.00
  
```

Expanded  $^1\text{H}$  NMR spectrum (700 MHz,  $\text{DMSO-d}_6$ ) of **1**

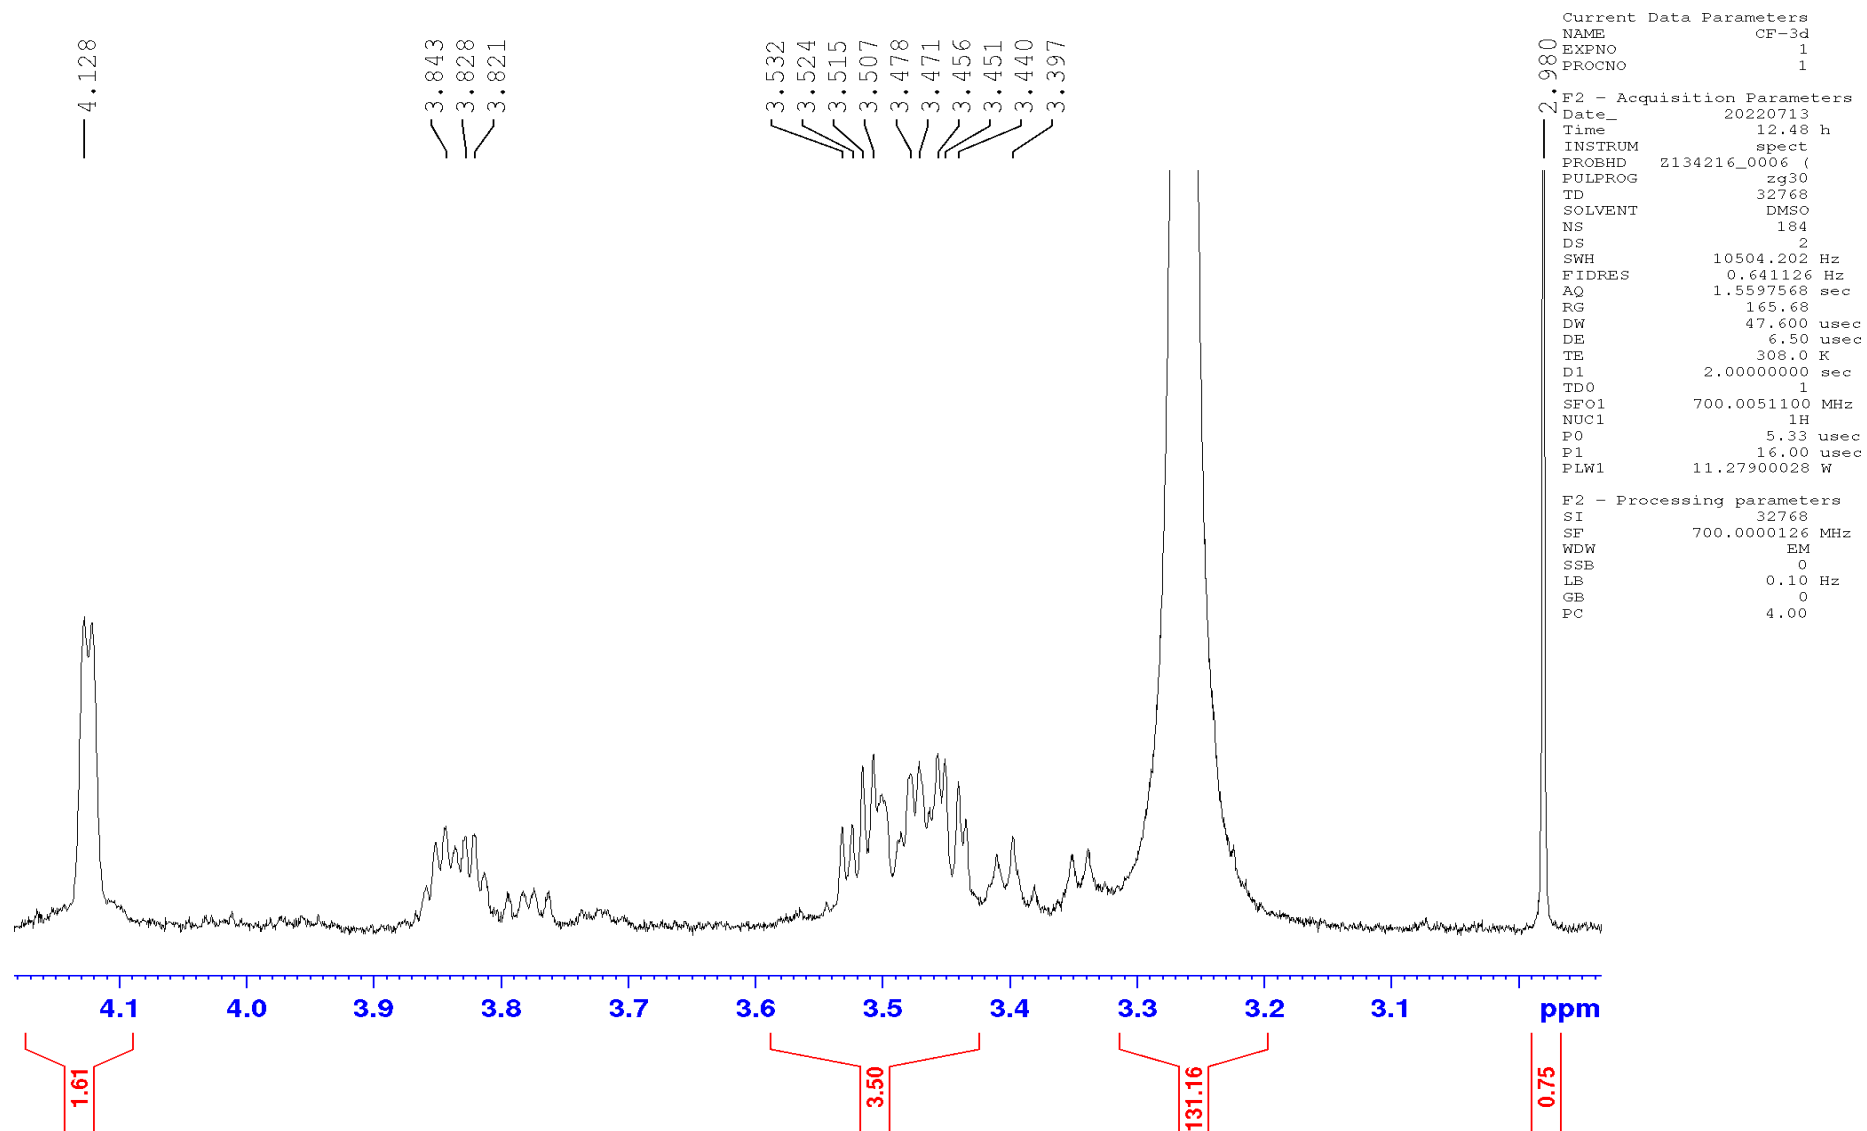

Expanded  $^1\text{H}$  NMR spectrum (700 MHz,  $\text{DMSO-d}_6$ ) of **1**

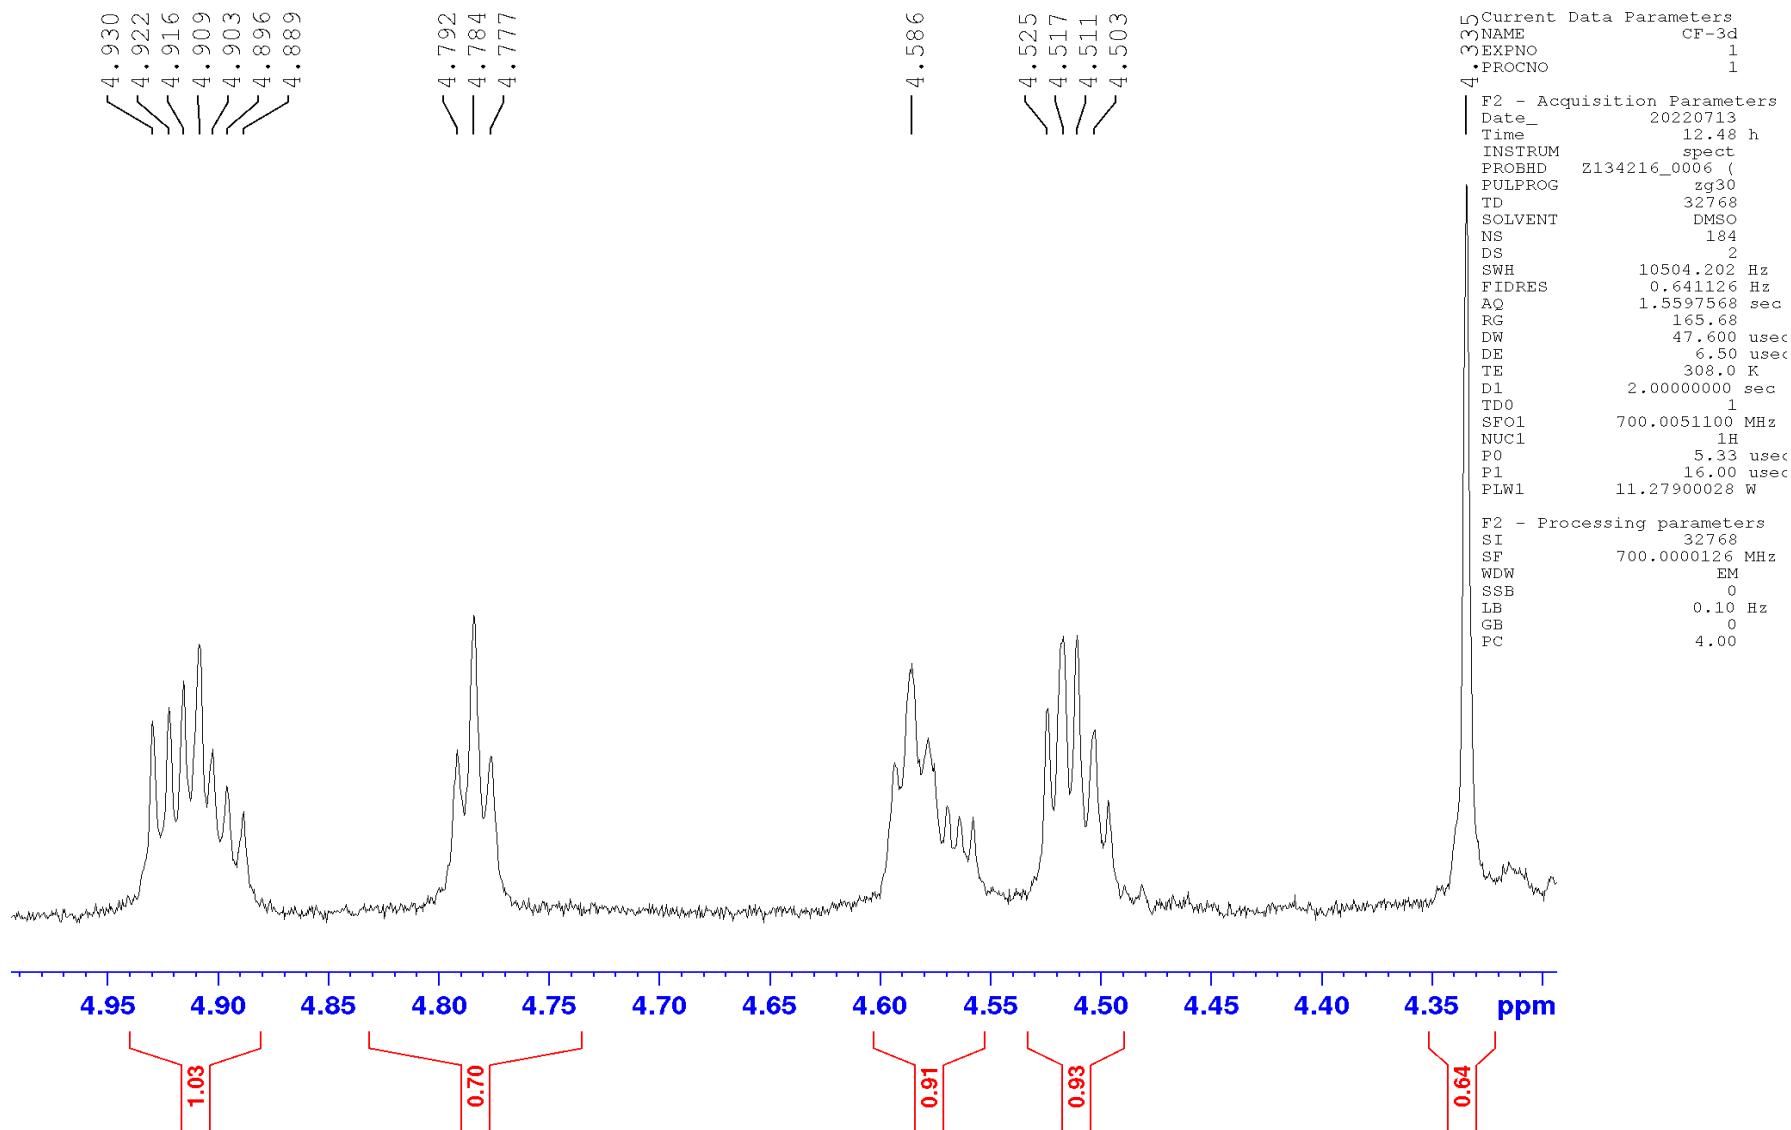

Expanded  $^1\text{H}$  NMR spectrum (700 MHz,  $\text{DMSO-d}_6$ ) of **1**

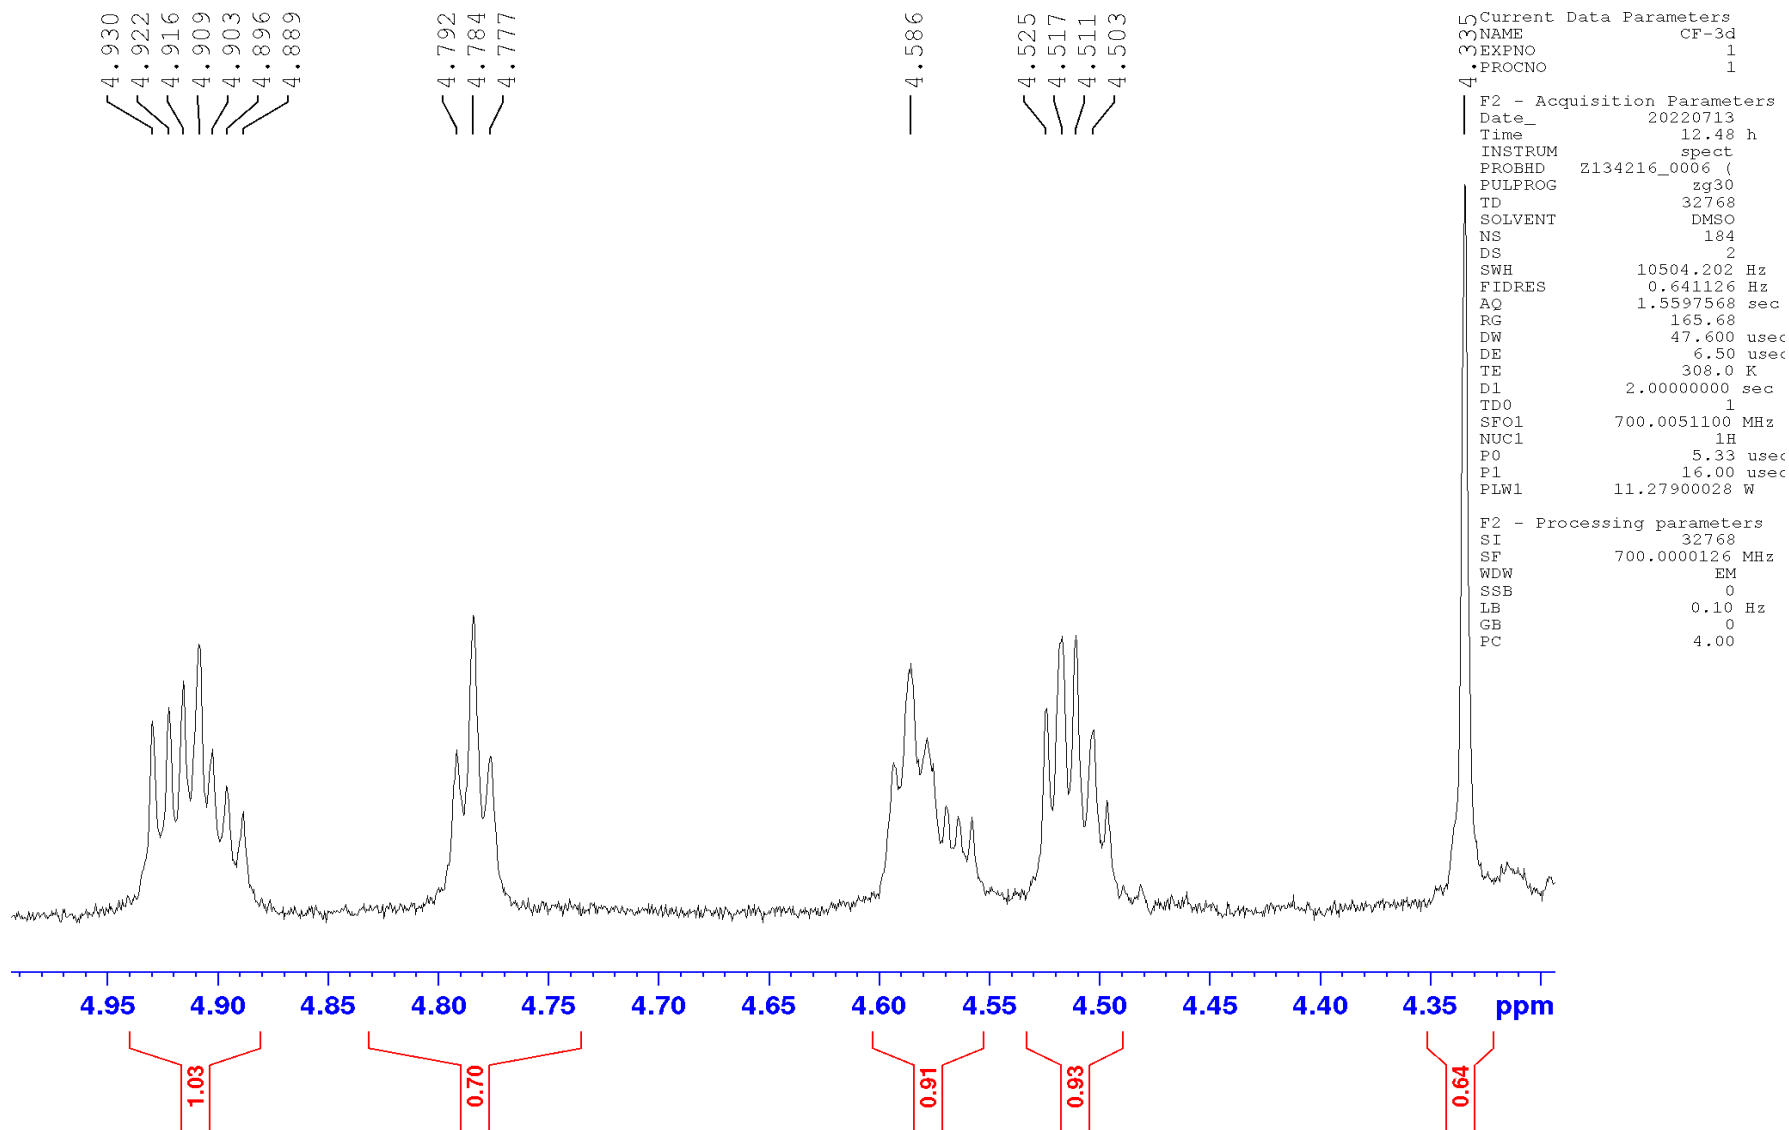

Expanded  $^1\text{H}$  NMR spectrum (700 MHz,  $\text{DMSO-d}_6$ ) of **1**

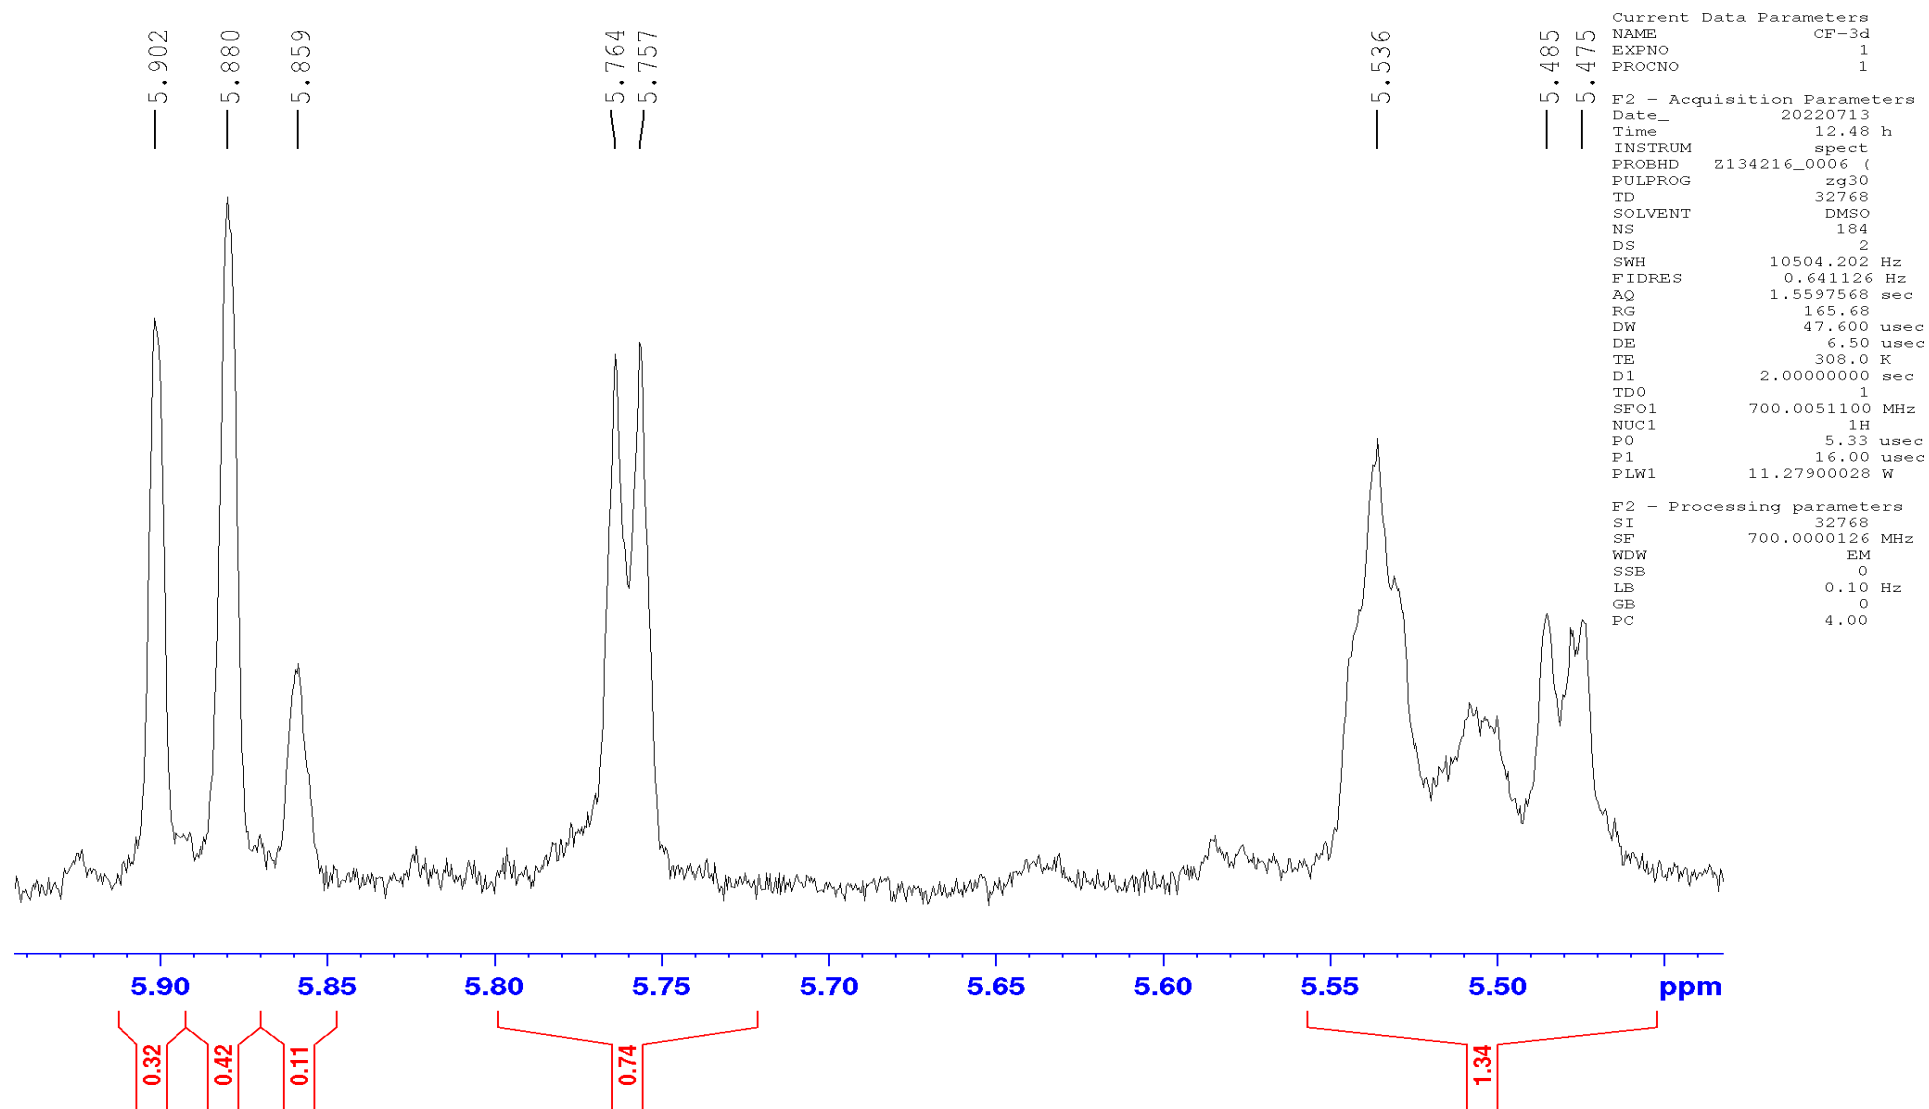

Expanded  $^1\text{H}$  NMR spectrum (700 MHz,  $\text{DMSO-d}_6$ ) of **1**

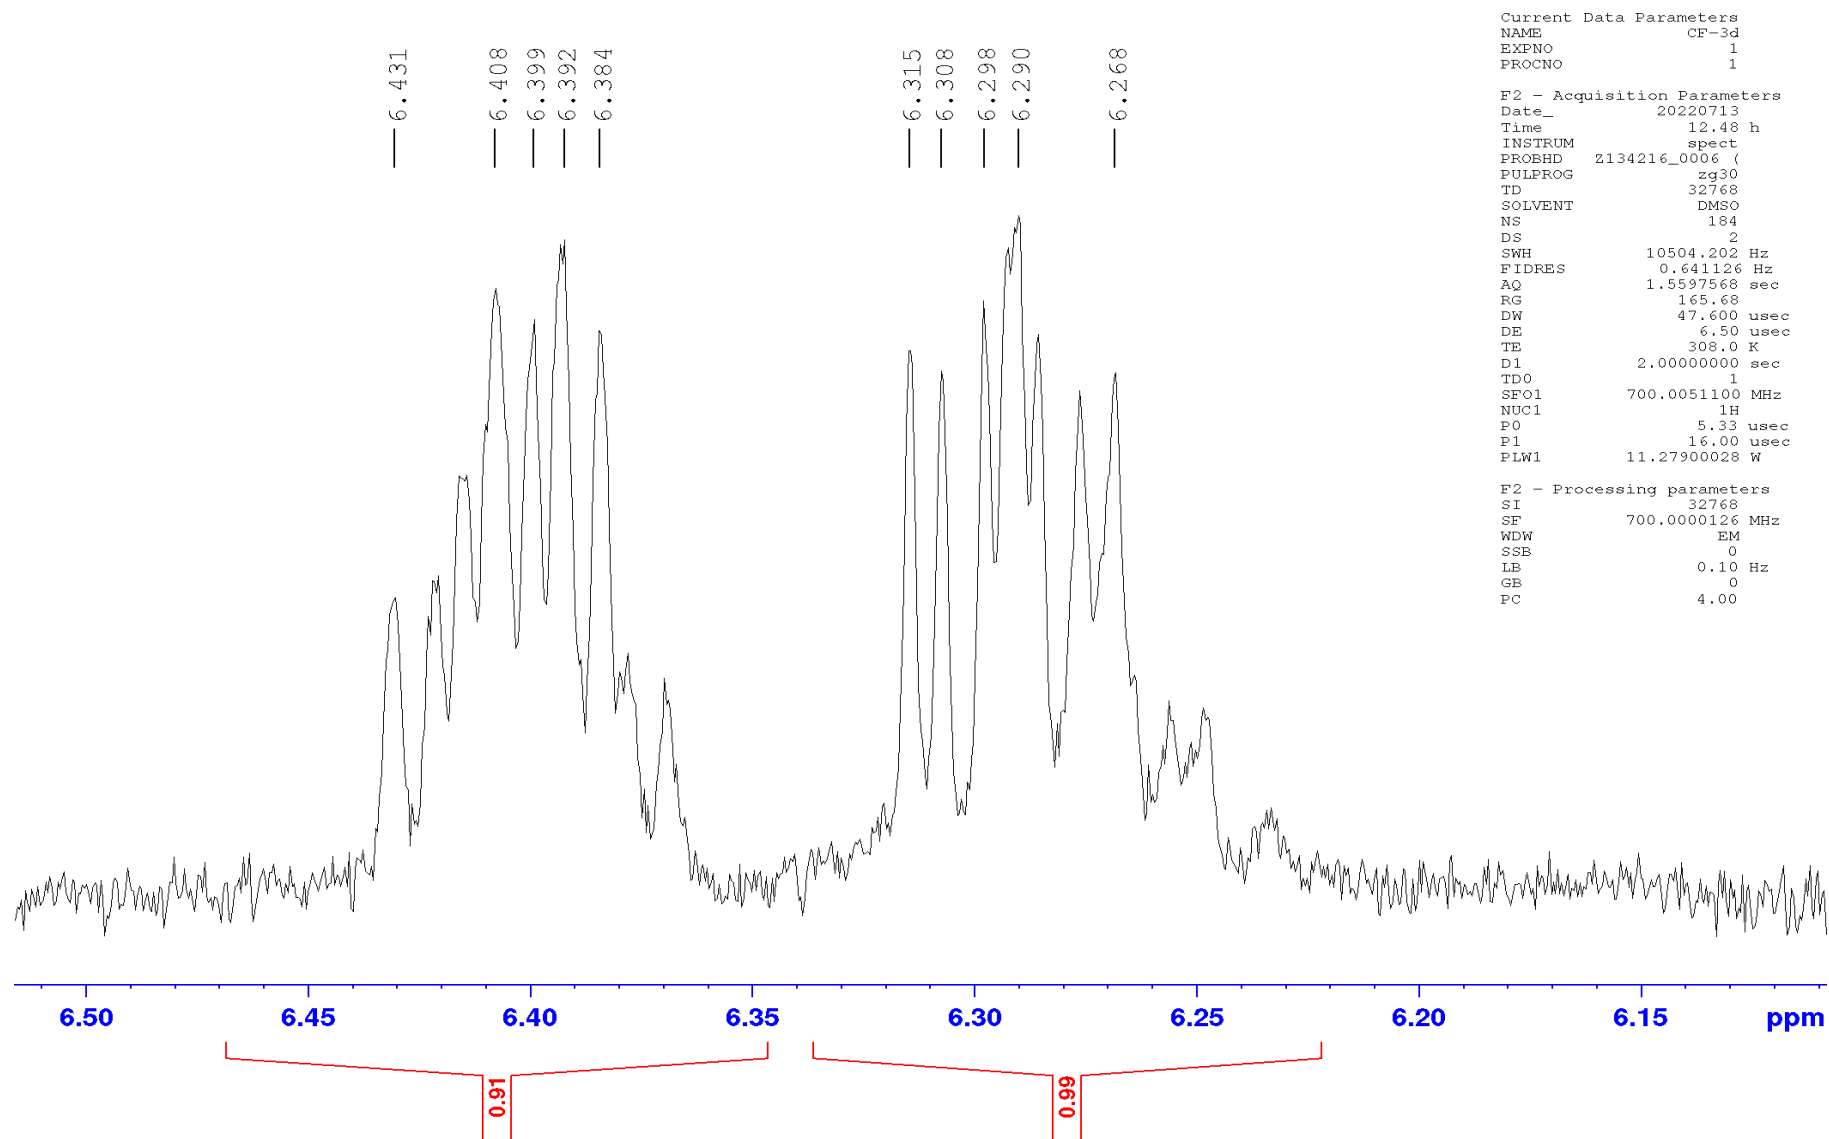

Expanded  $^1\text{H}$  NMR spectrum (700 MHz,  $\text{DMSO-d}_6$ ) of **1**

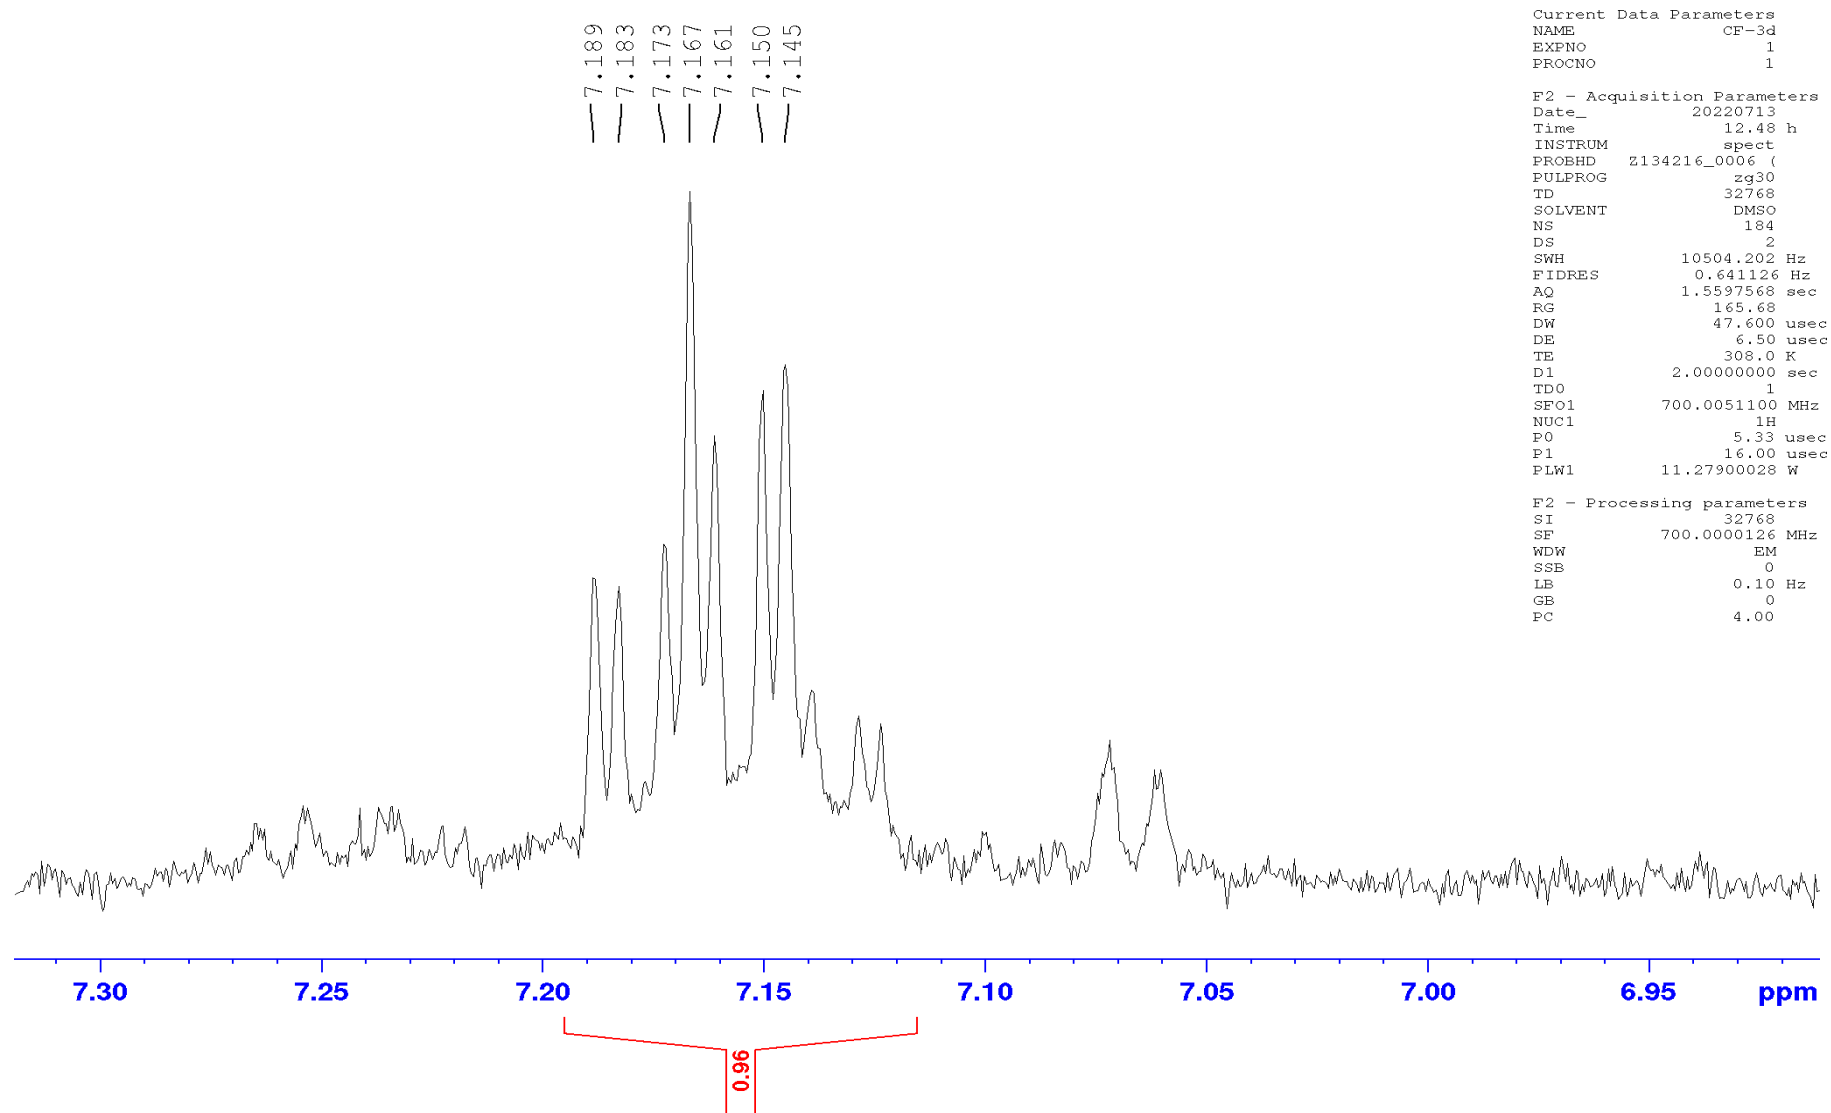

Expanded  $^1\text{H}$  NMR spectrum (700 MHz,  $\text{DMSO-d}_6$ ) of **1**

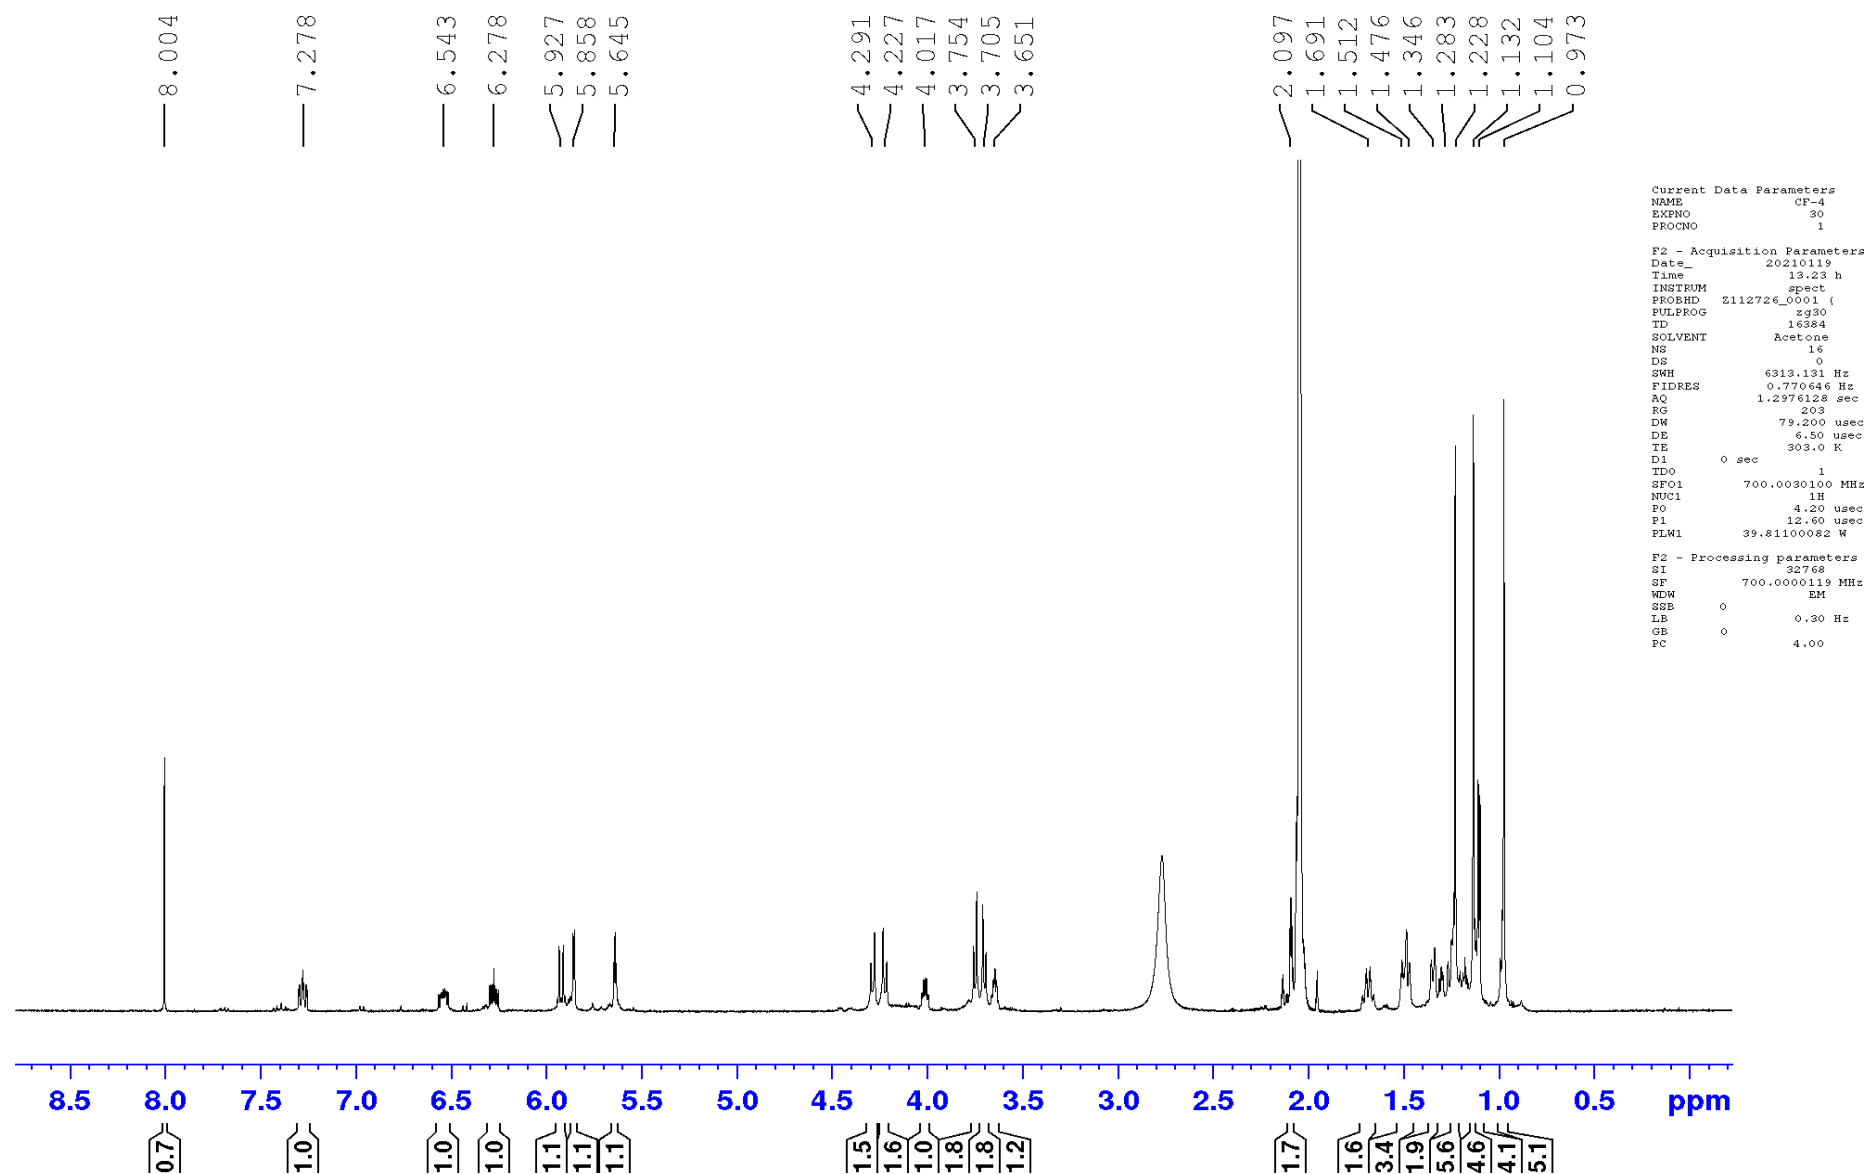

Figure S22.  $^1\text{H}$  NMR spectrum (700 MHz, acetone- $\text{d}_6$ ) of **2**

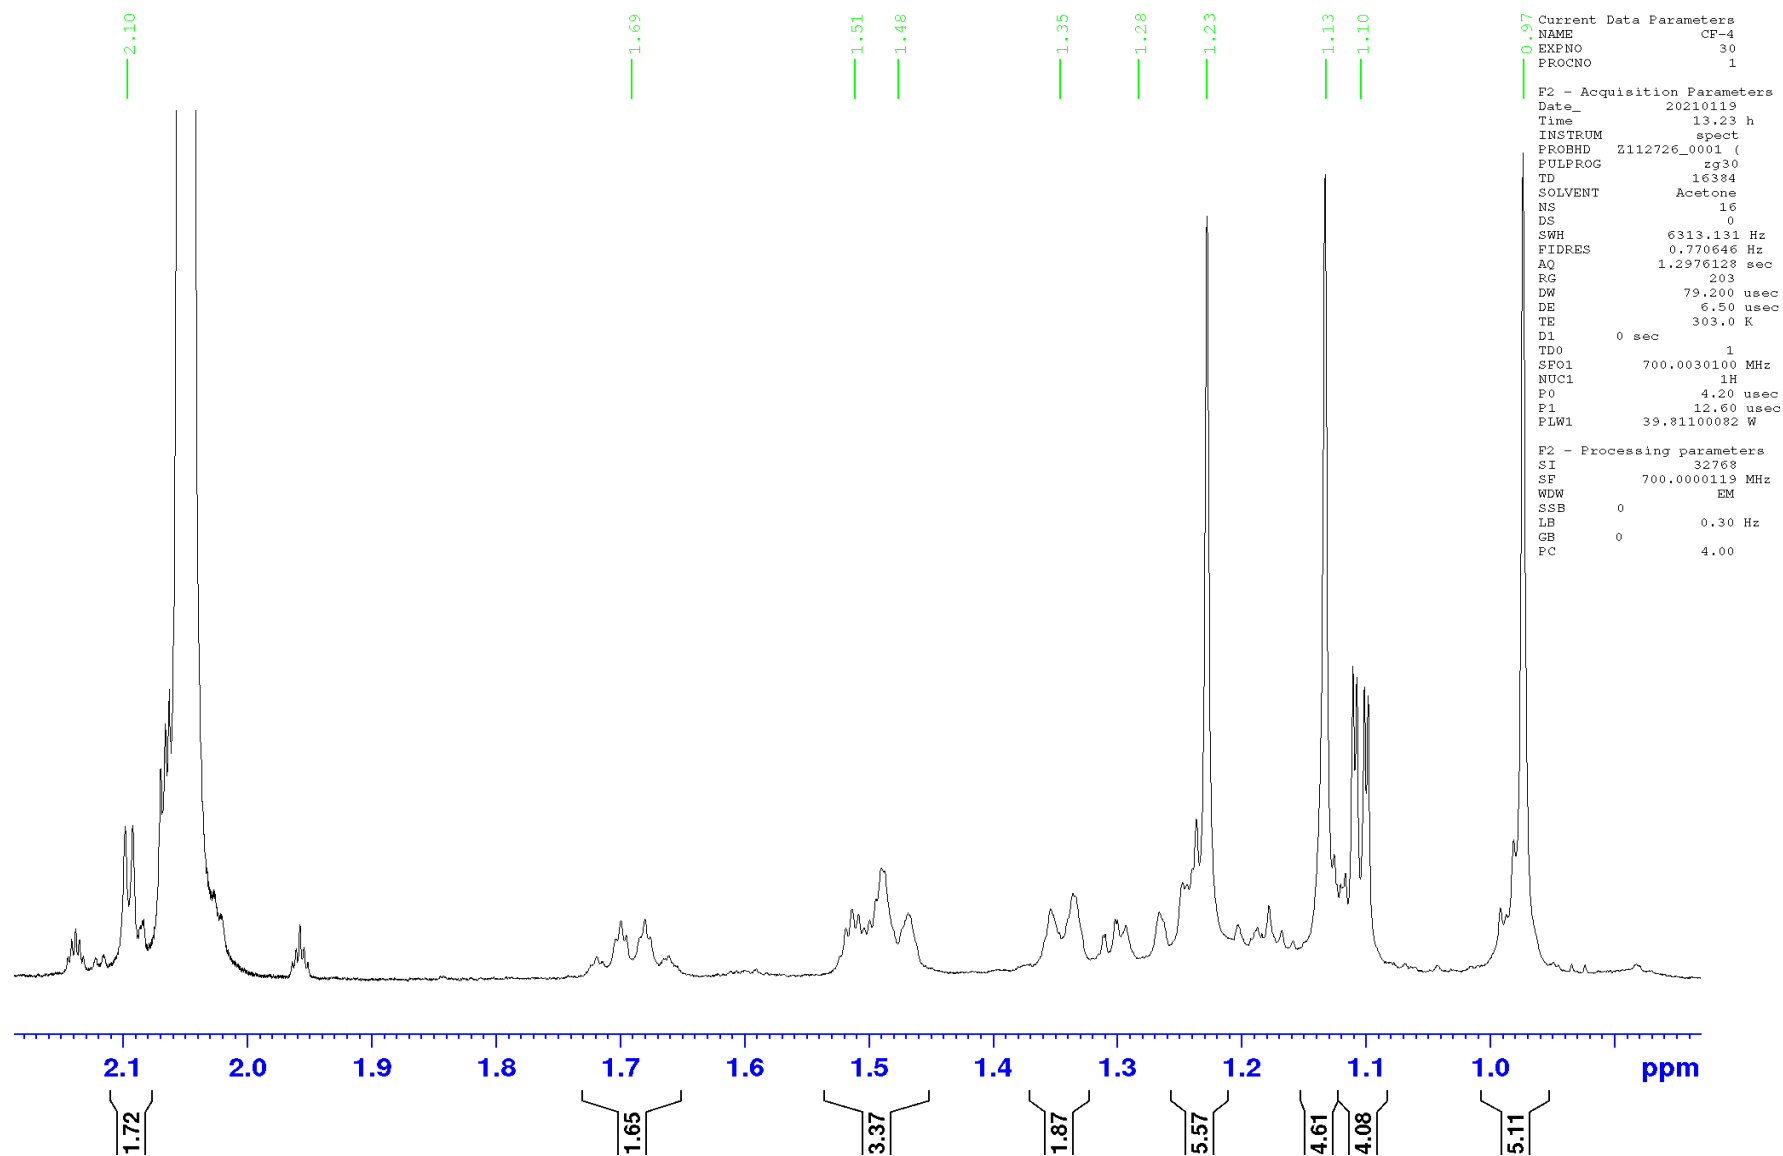

$^1\text{H}$  NMR spectrum (700 MHz, acetone- $\text{d}_6$ ) of **2** (expanded)

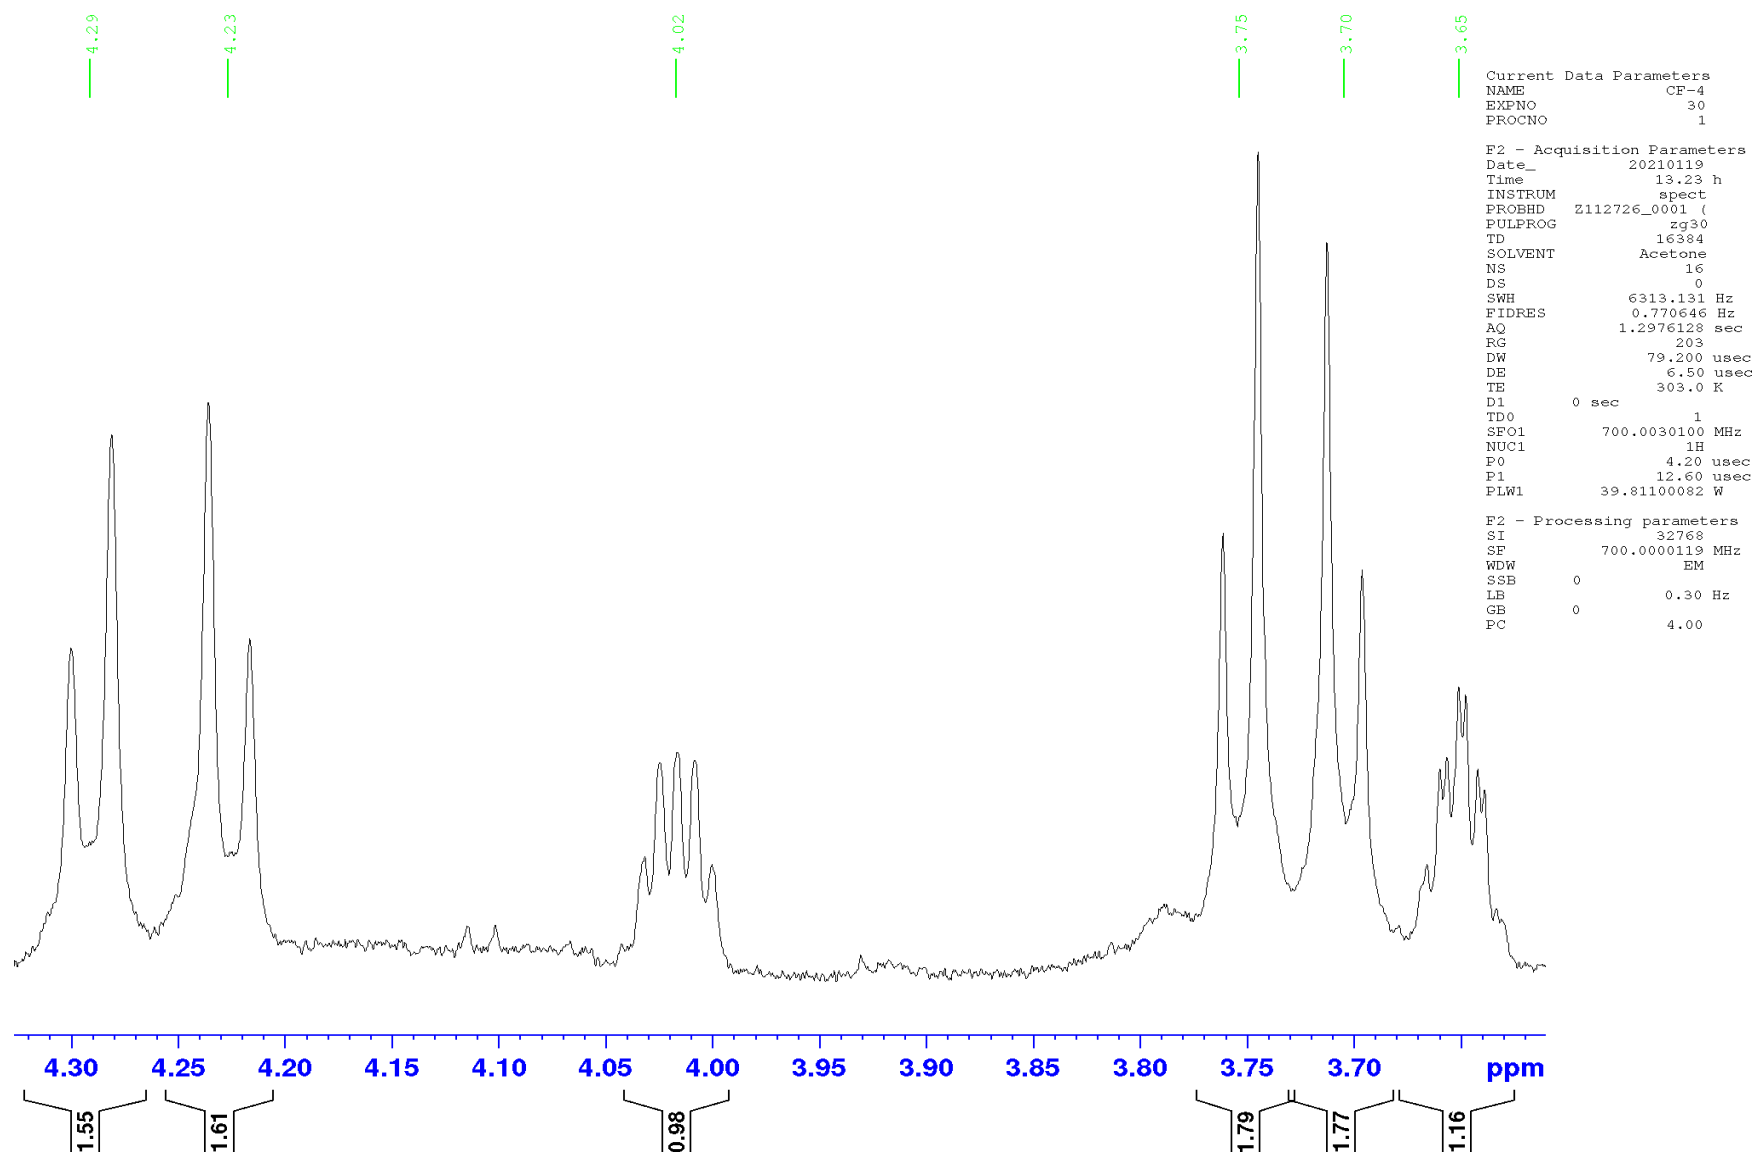

$^1\text{H}$  NMR spectrum (700 MHz, acetone- $\text{d}_6$ ) of **2** (expanded)

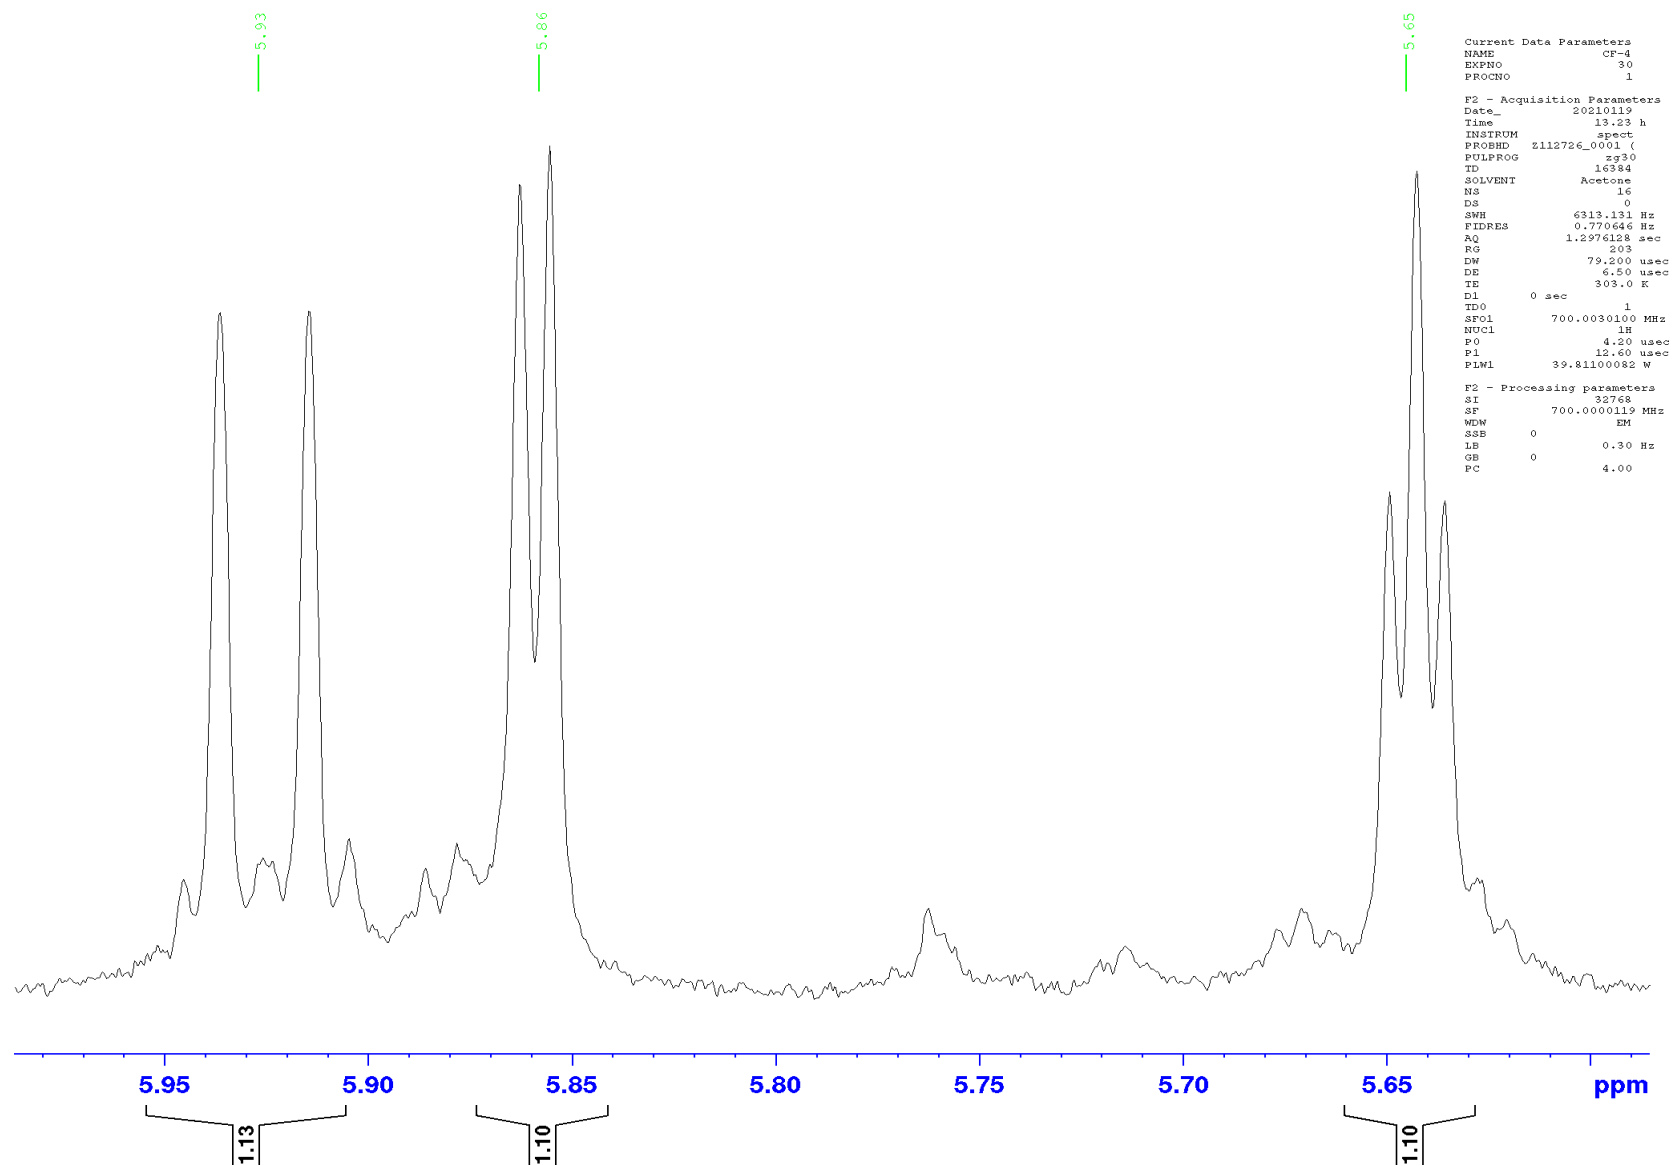

$^1\text{H}$  NMR spectrum (700 MHz, acetone- $\text{d}_6$ ) of **2** (expanded)

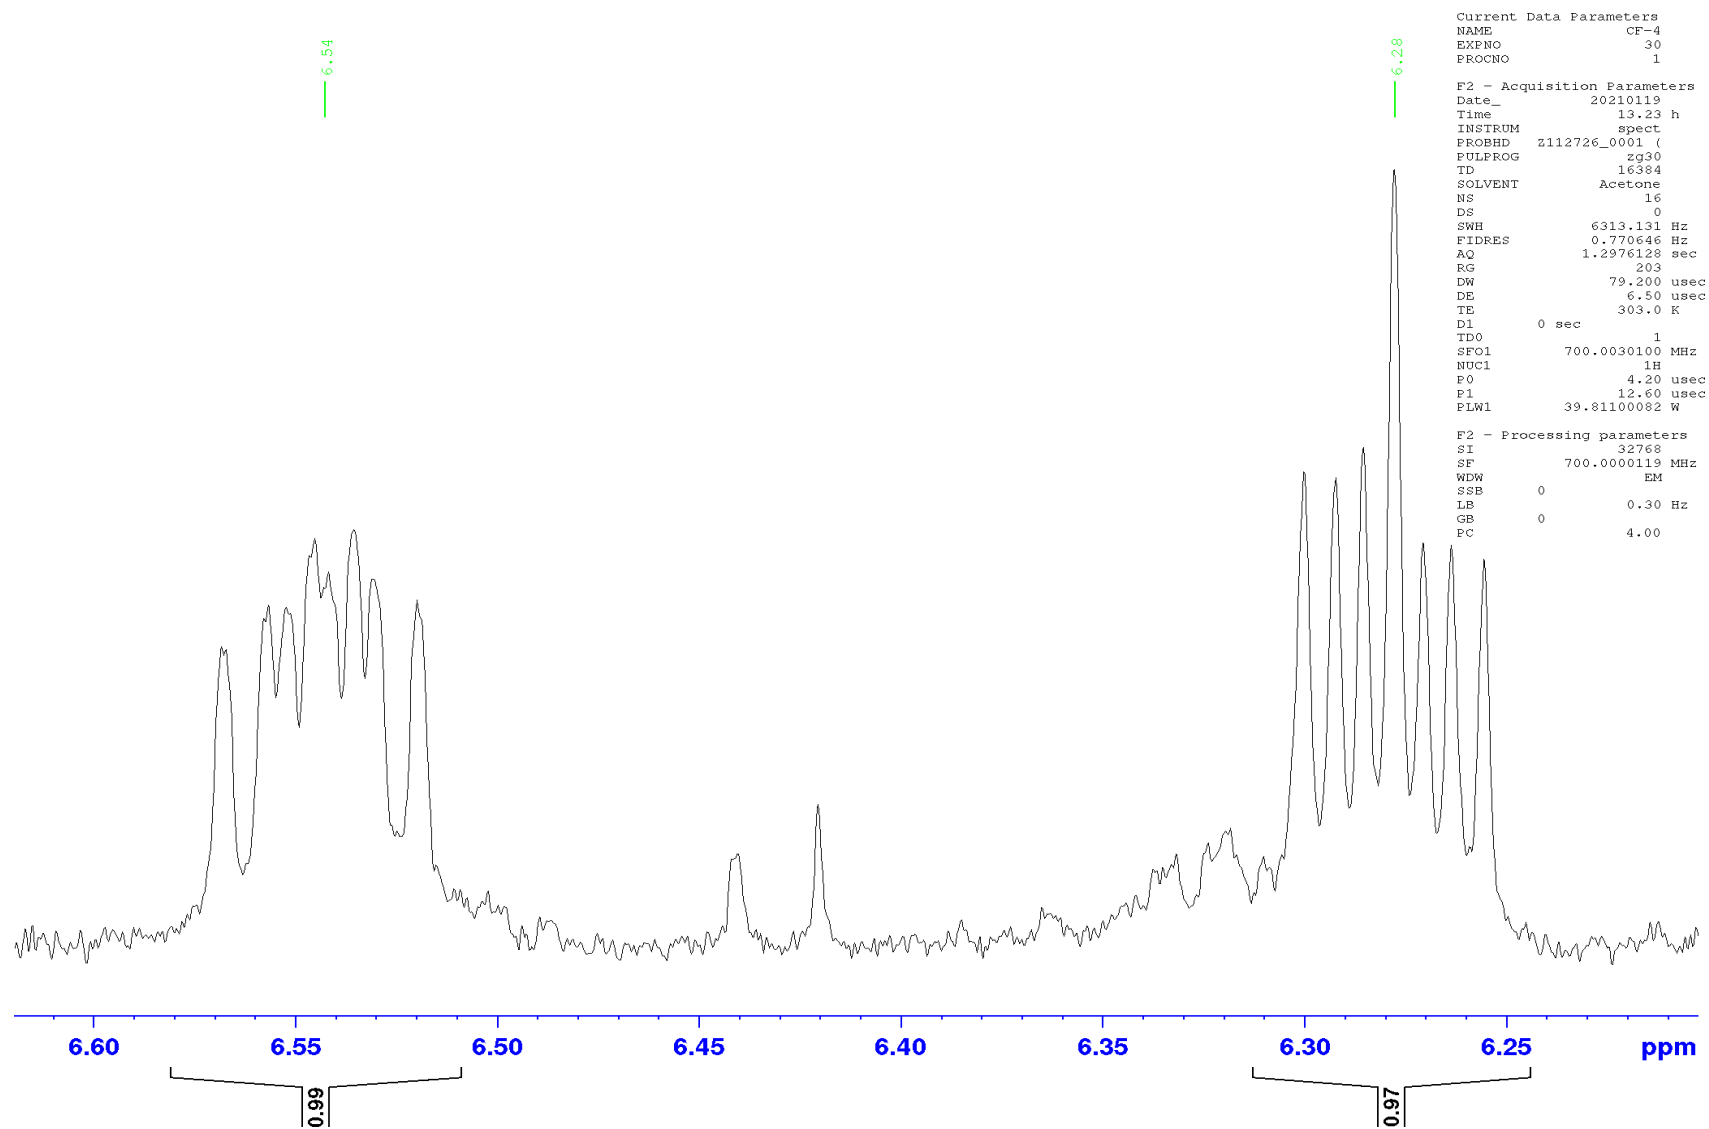

$^1\text{H}$  NMR spectrum (700 MHz, acetone- $\text{d}_6$ ) of **2** (expanded)

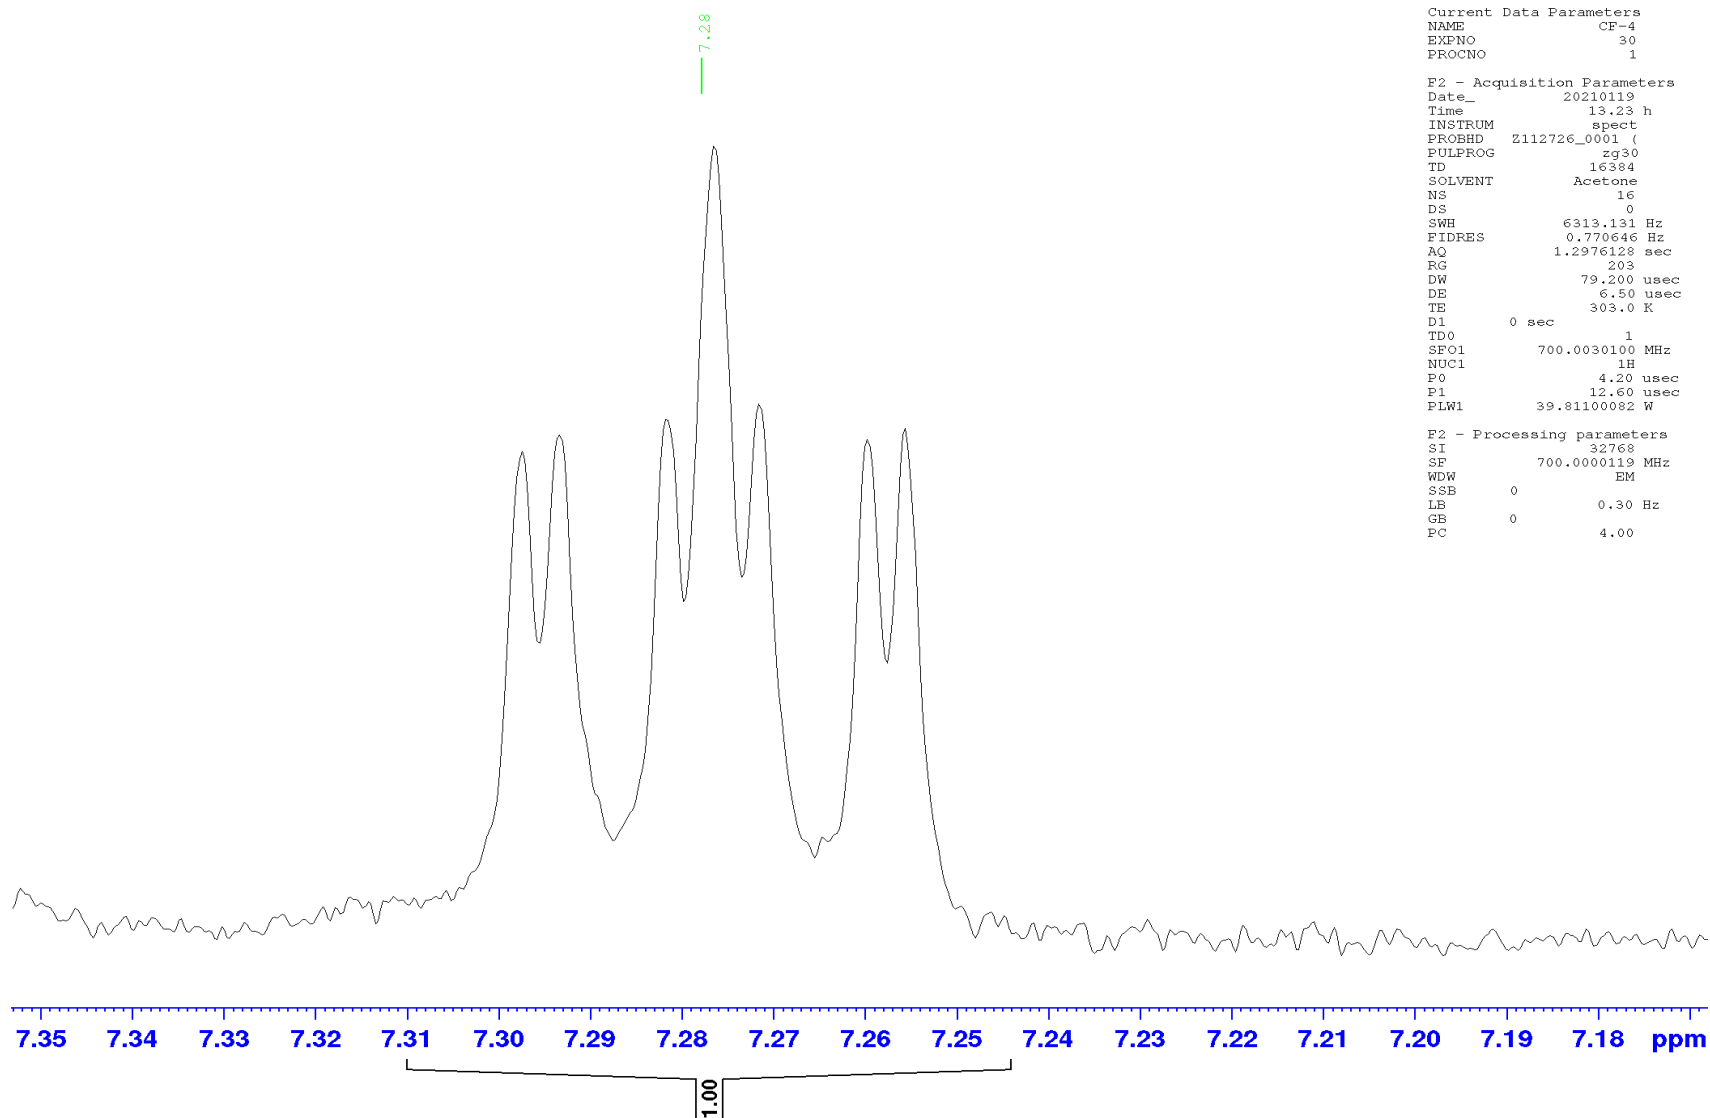

$^1\text{H}$  NMR spectrum (700 MHz, acetone- $\text{d}_6$ ) of **2** (expanded)

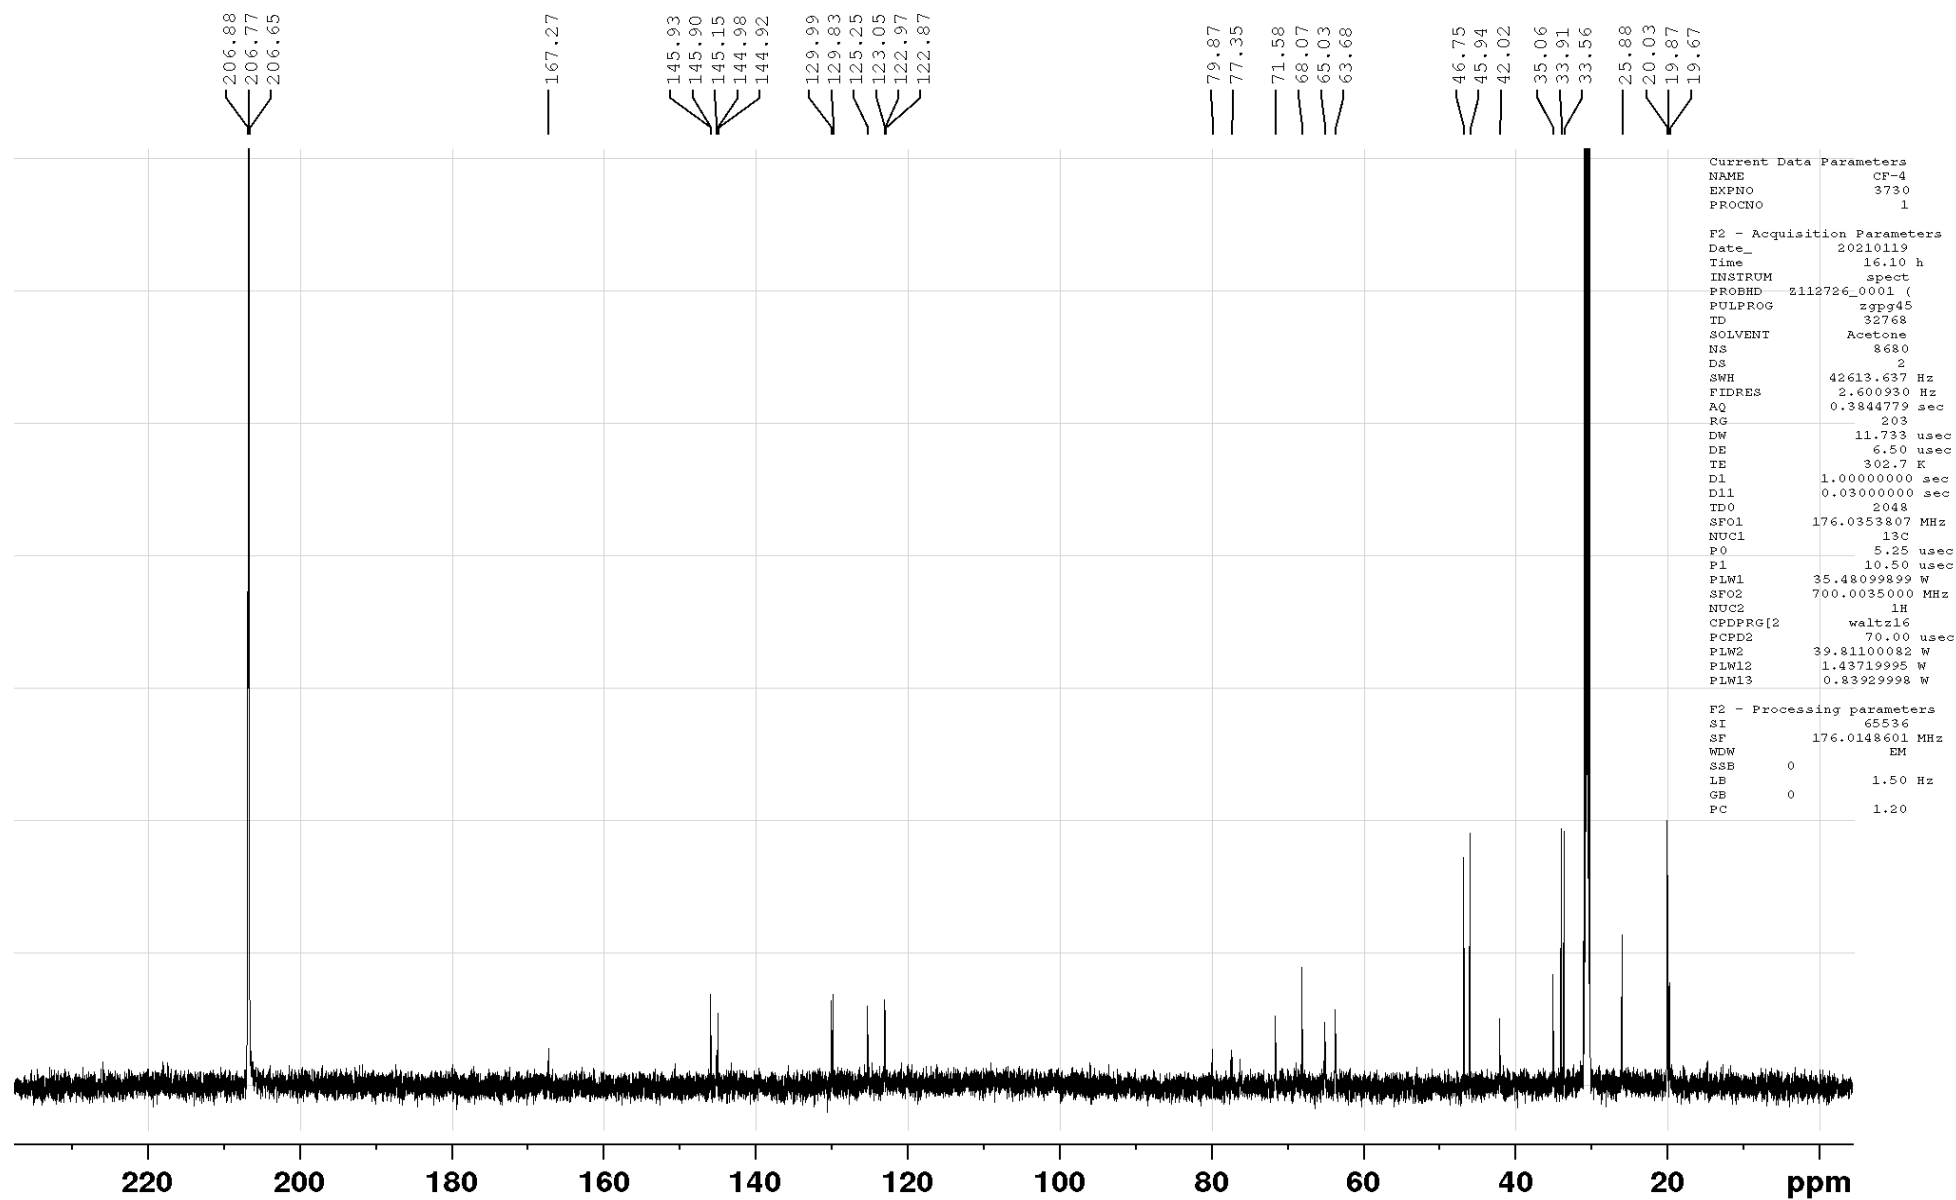

Figure S23.  $^{13}\text{C}$  NMR spectrum (175 MHz, acetone- $\text{d}_6$ ) of **2**

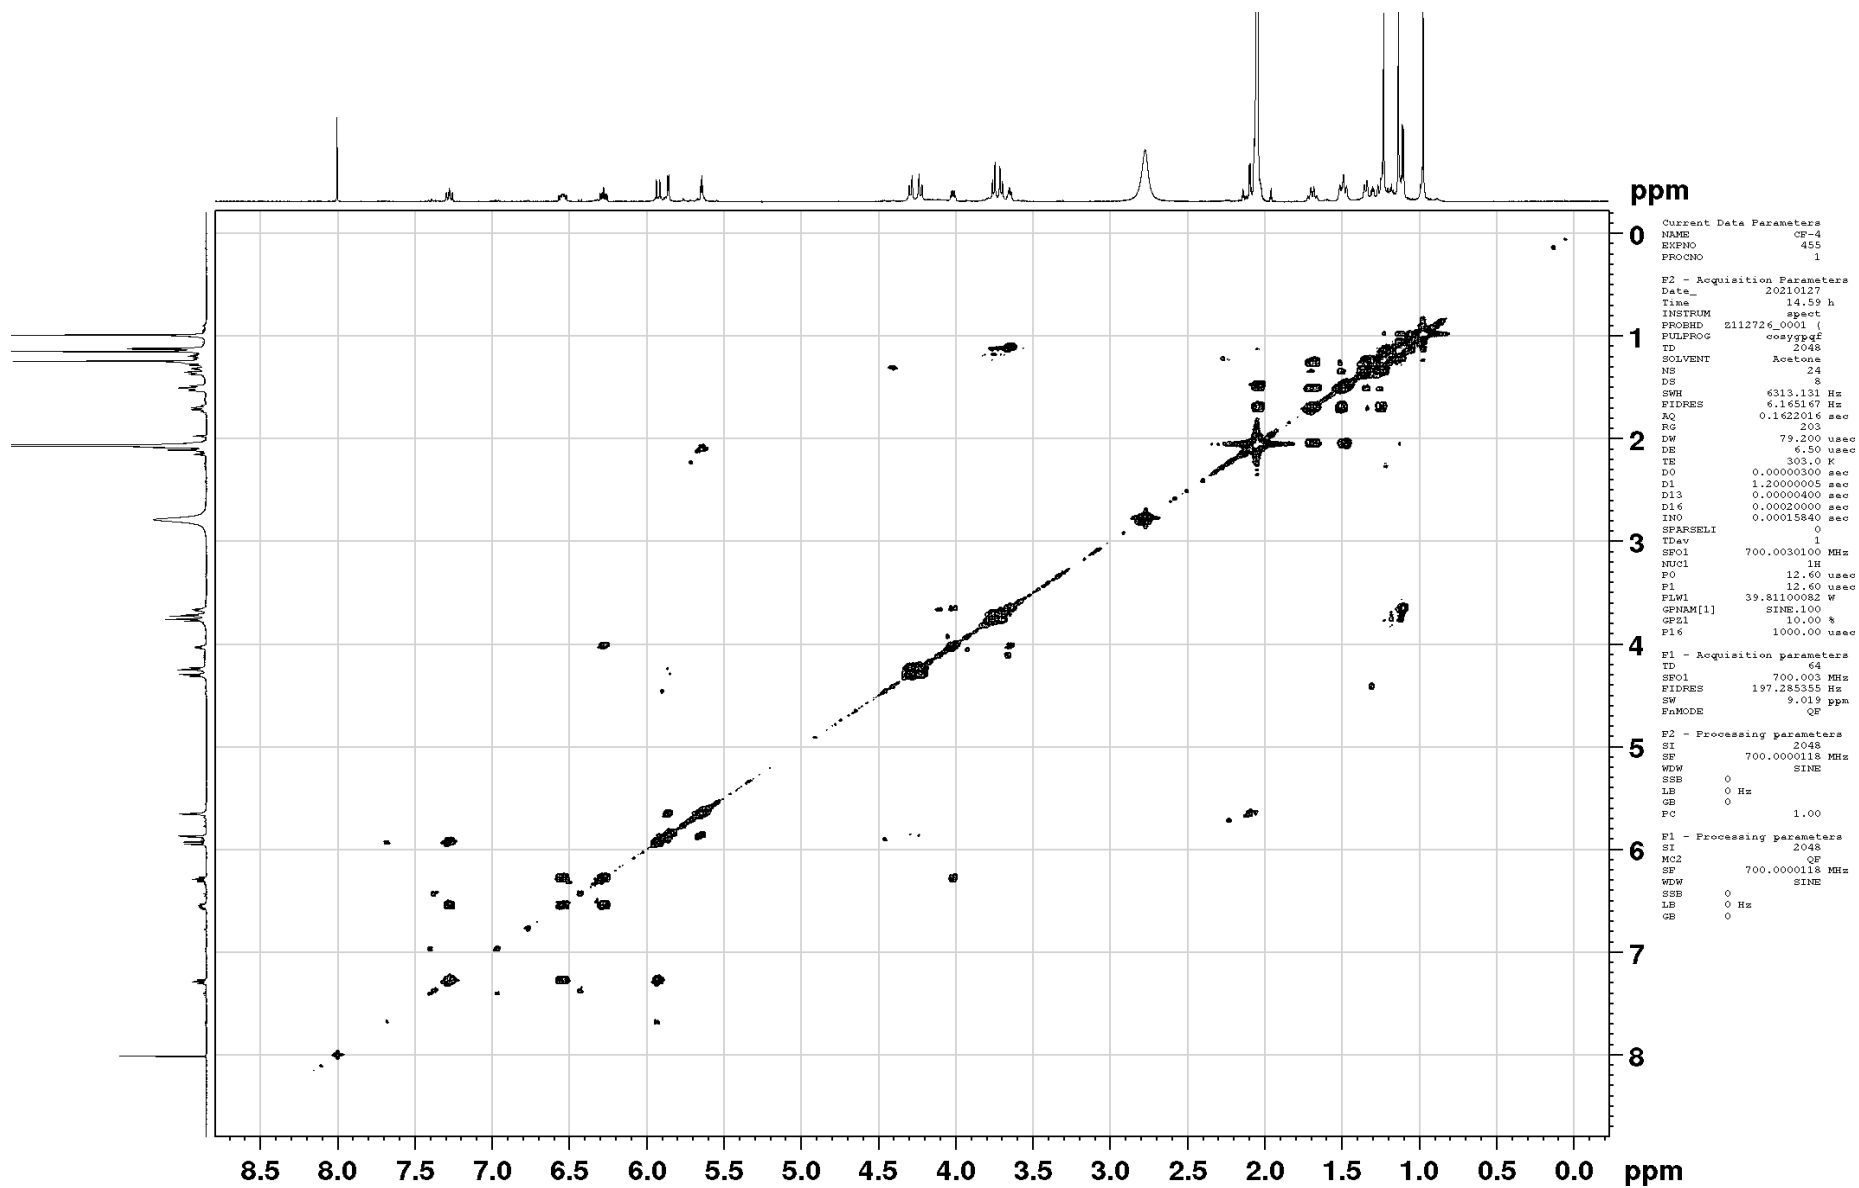

Figure S24. COSY-45 spectrum (700 MHz, acetone- $d_6$ ) of **2**

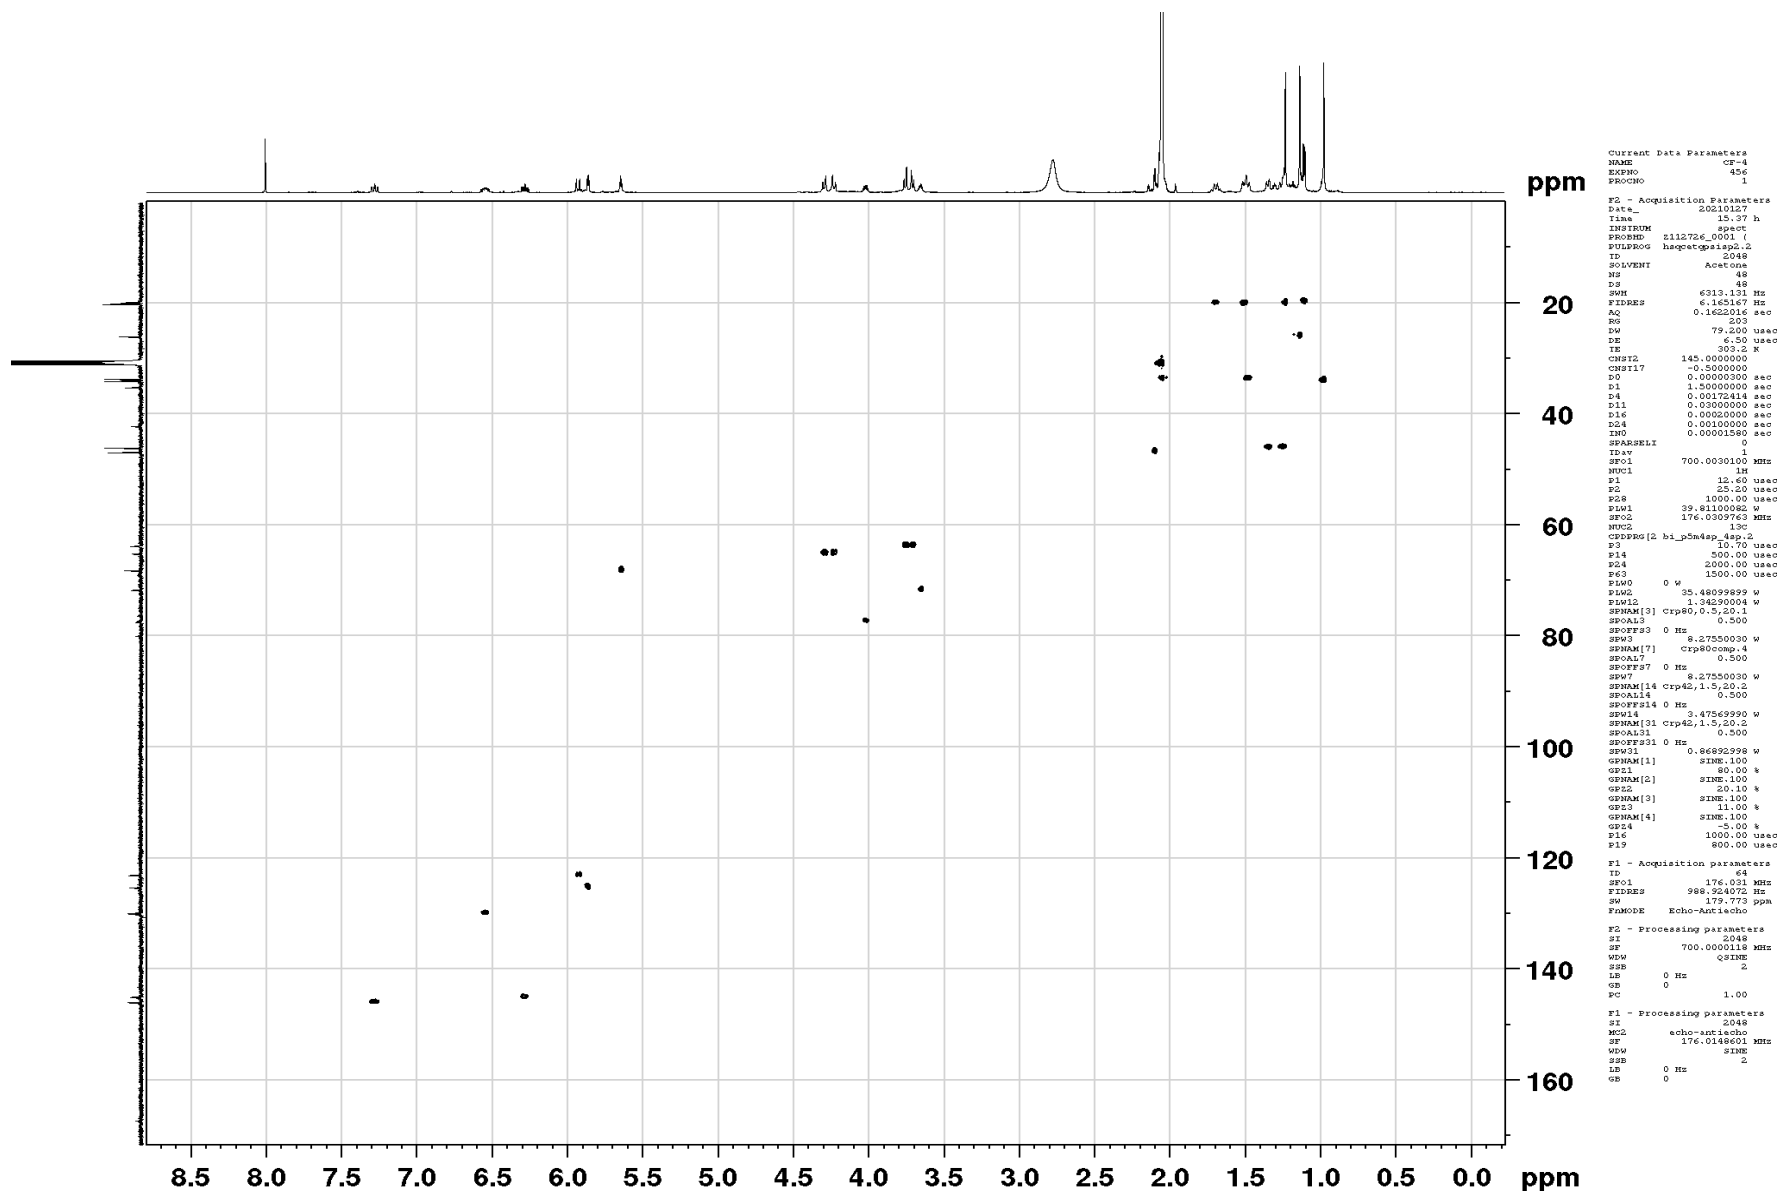

Figure S25. HSQC spectrum (700 MHz, acetone- $d_6$ ) of **2**

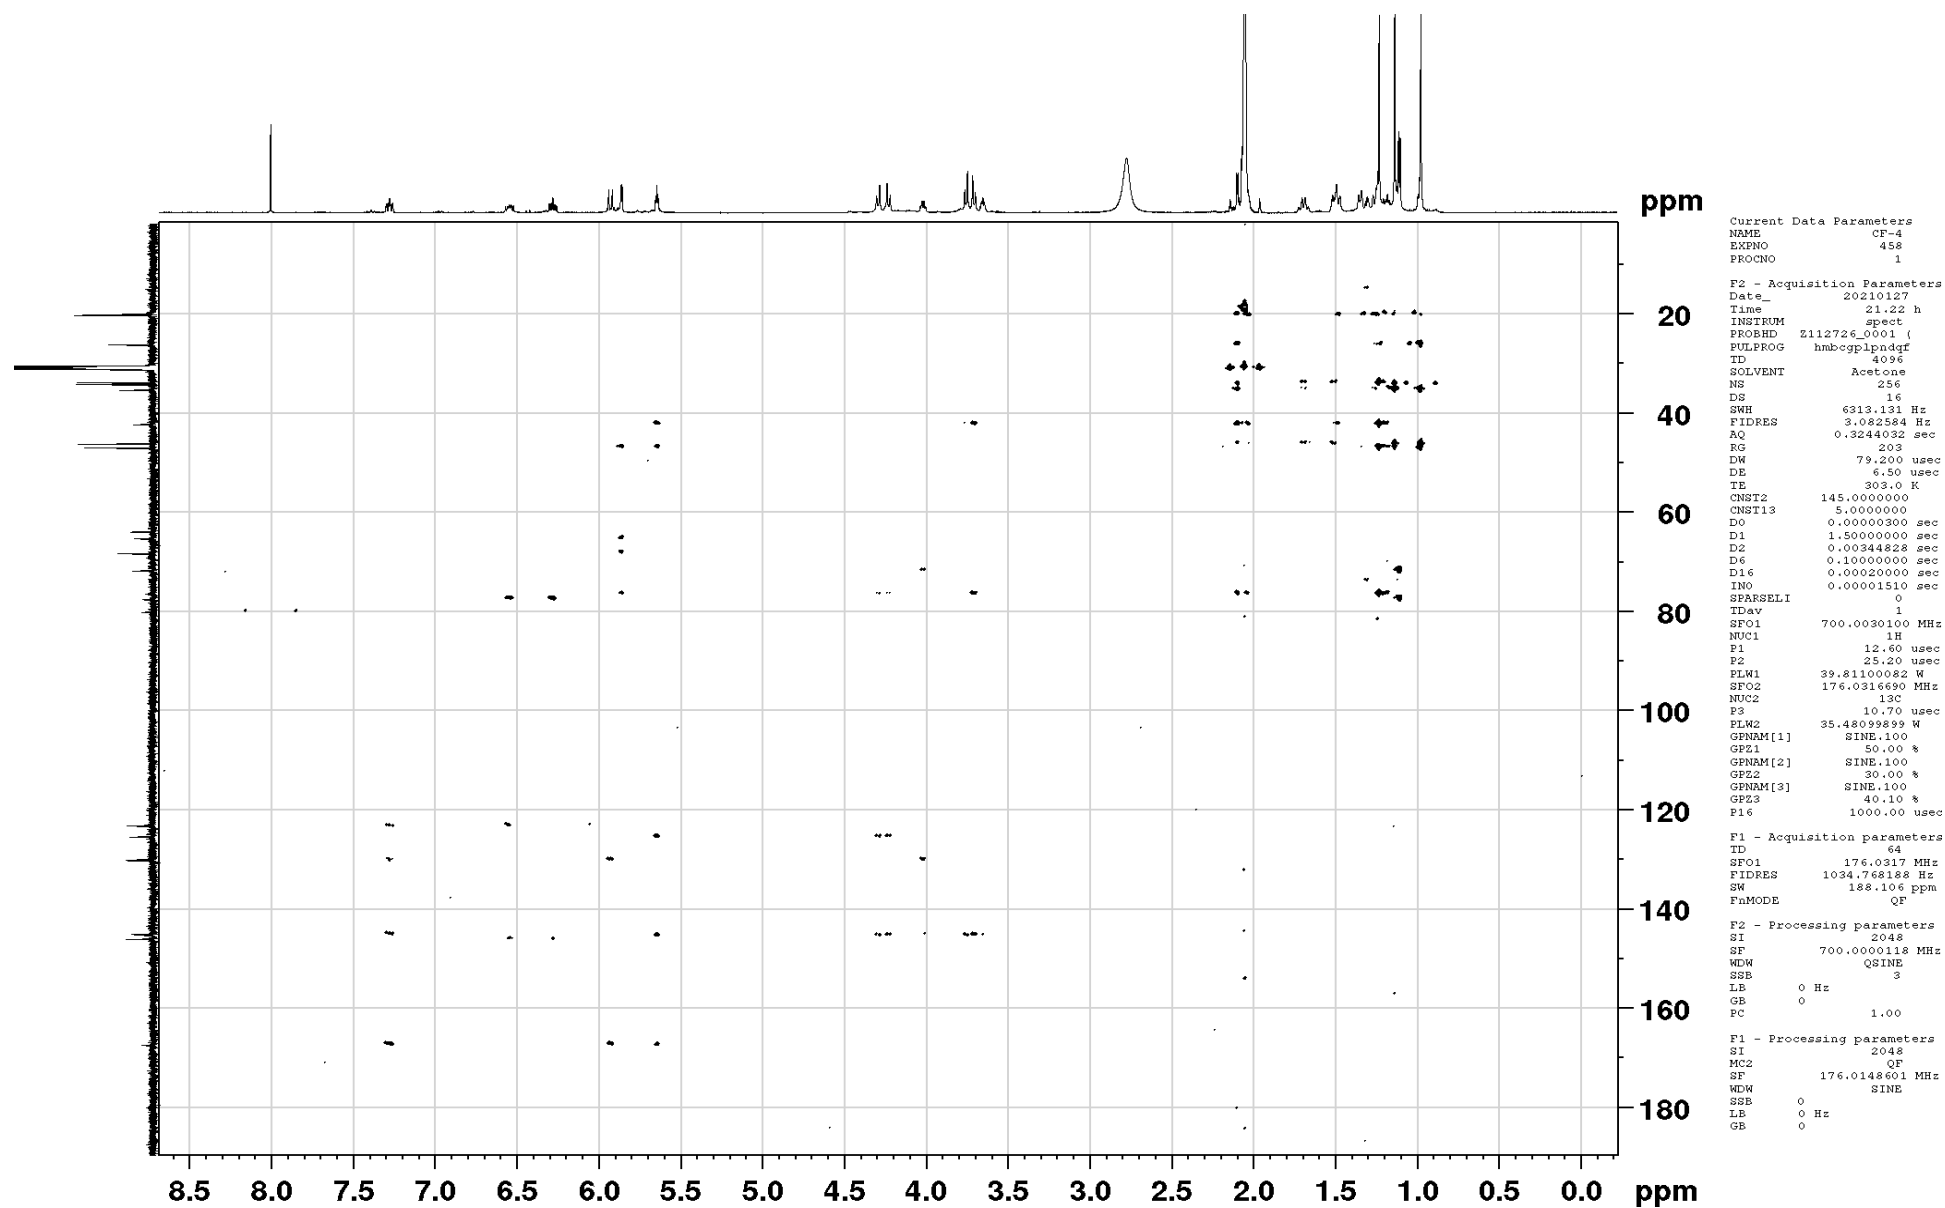

Figure S26. HMBC spectrum (700 MHz, acetone-d<sub>6</sub>) of **2**

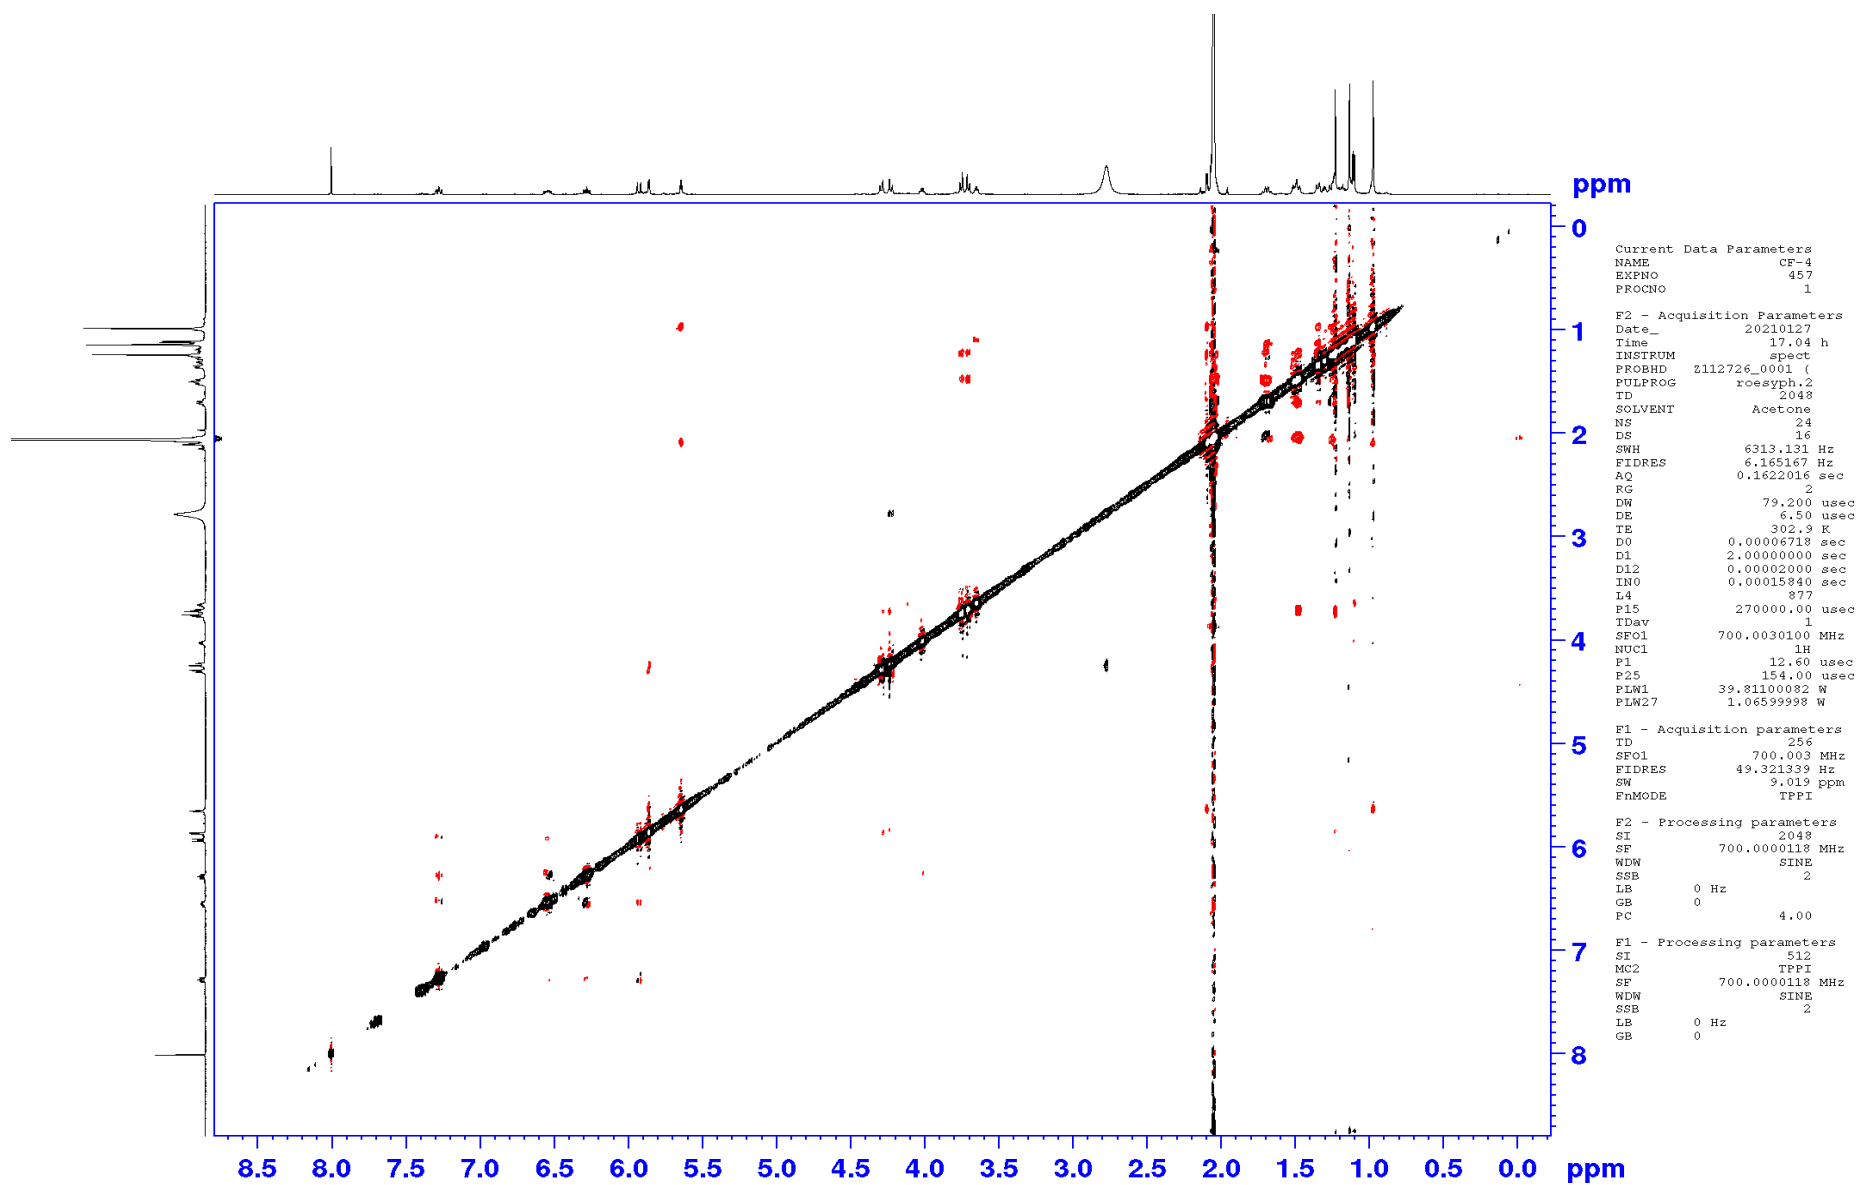

Figure S27. ROESY spectrum (700 MHz, acetone- $d_6$ ) of **2**

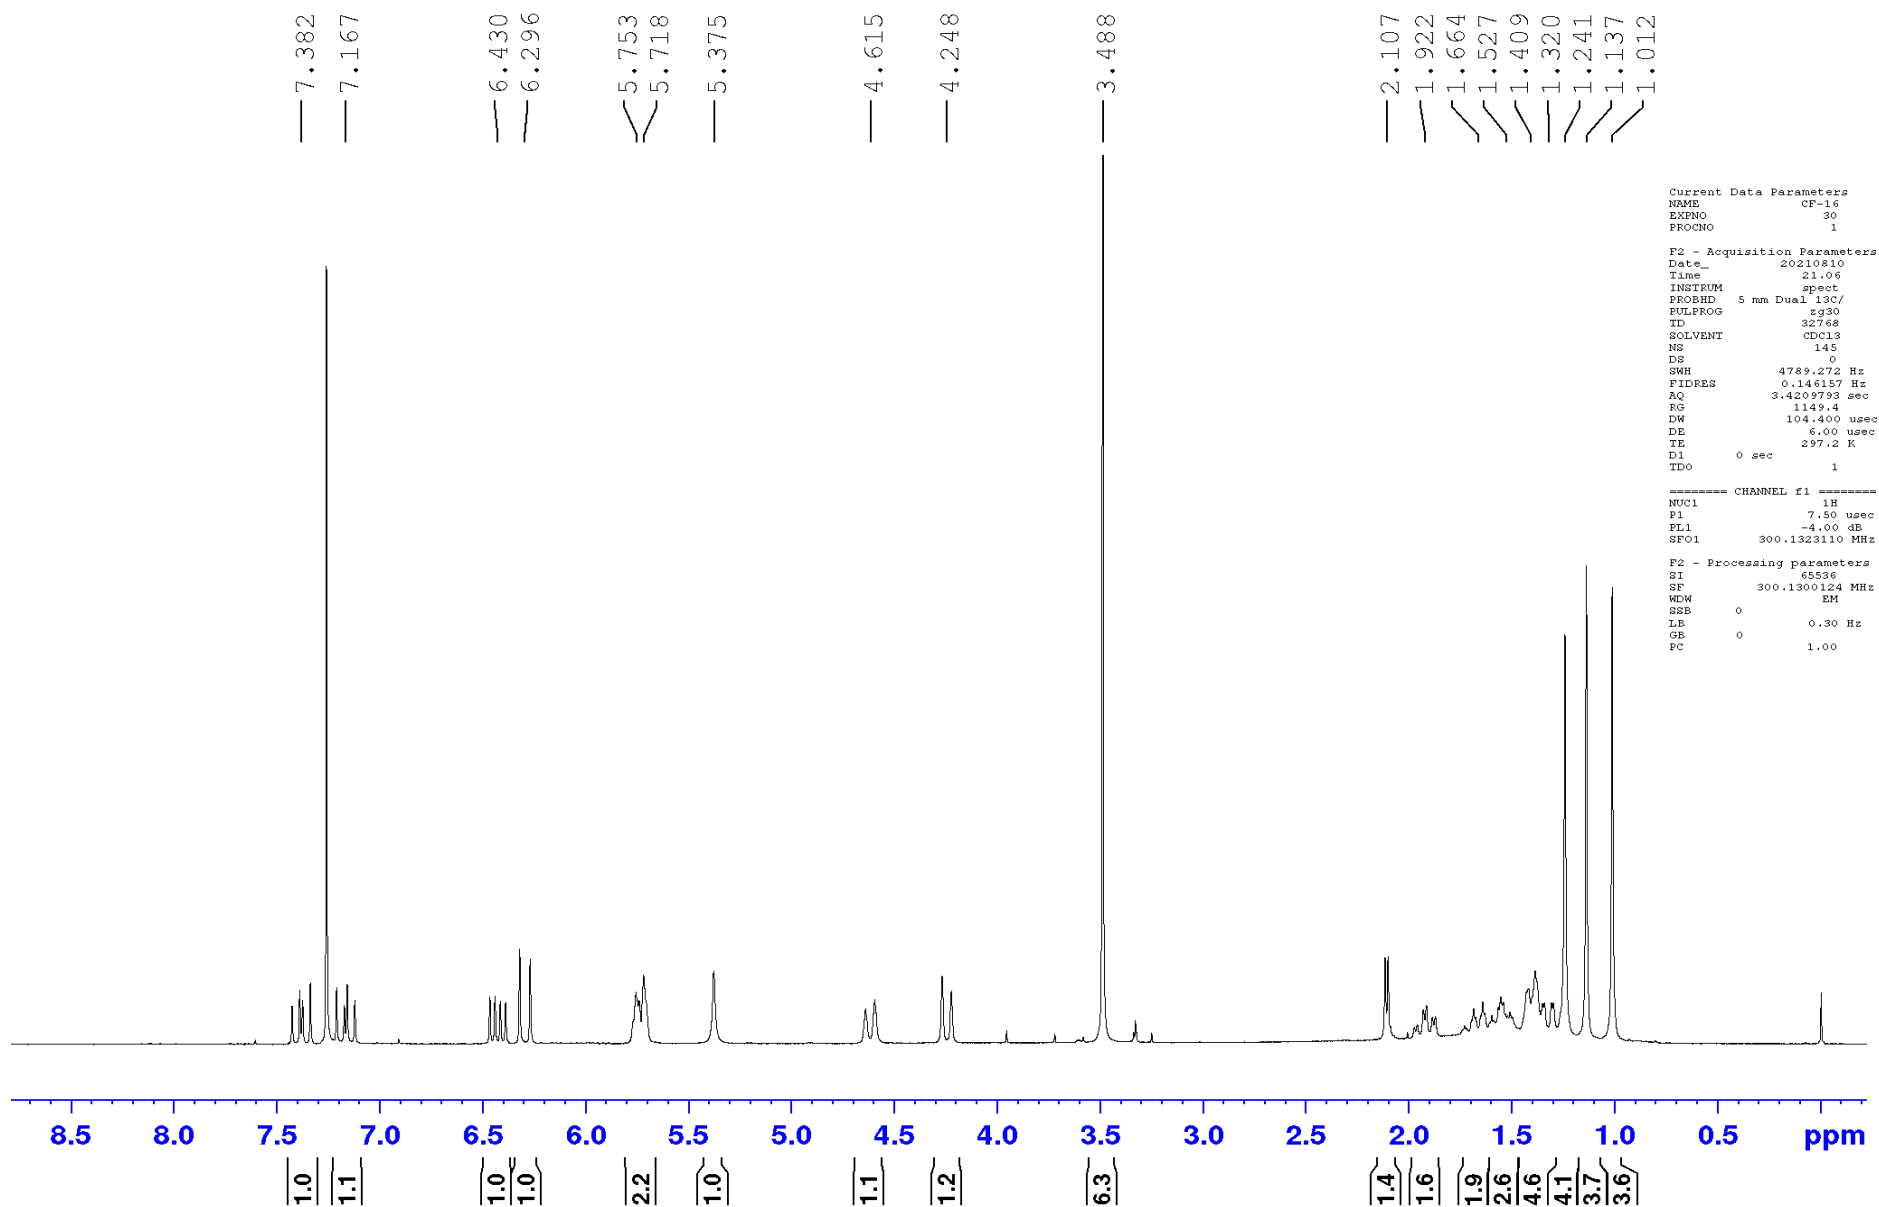

Figure S28.  $^1\text{H}$  NMR spectrum (300 MHz,  $\text{CDCl}_3$ ) of **3**

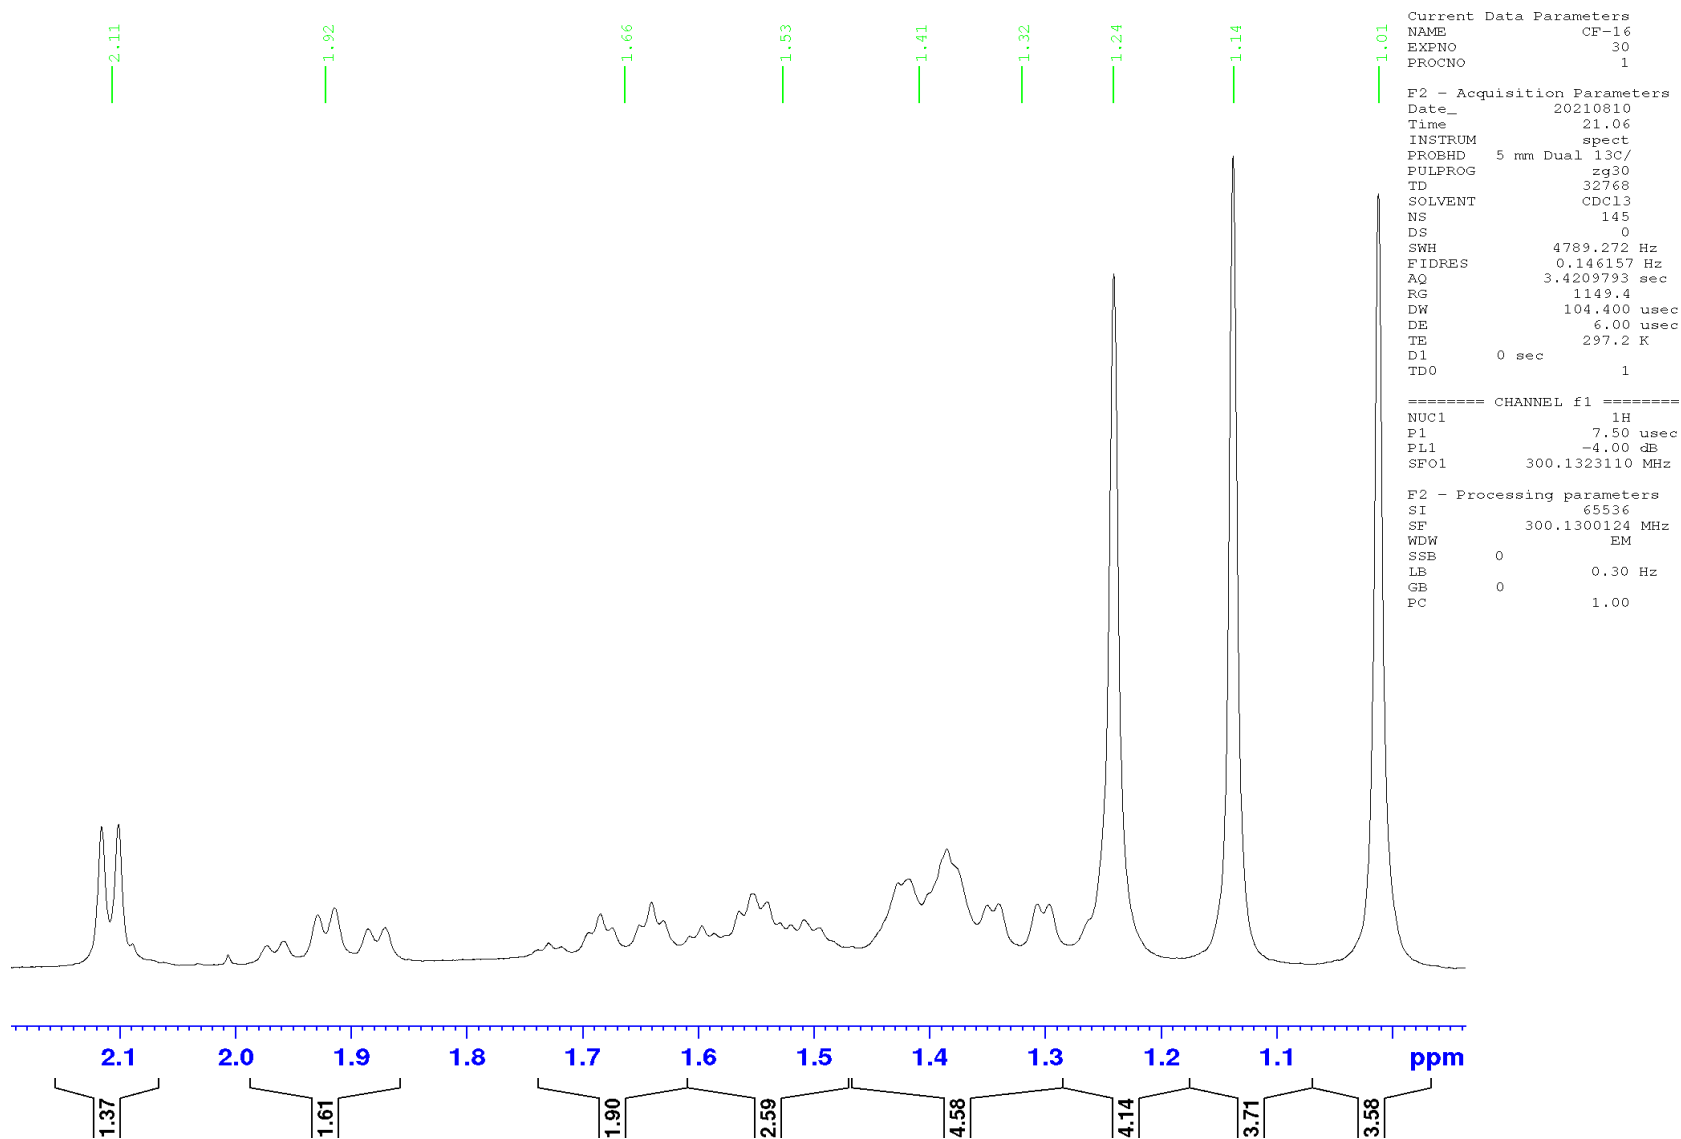

$^1\text{H}$  NMR spectrum (300 MHz,  $\text{CDCl}_3$ ) of **3** (expanded)

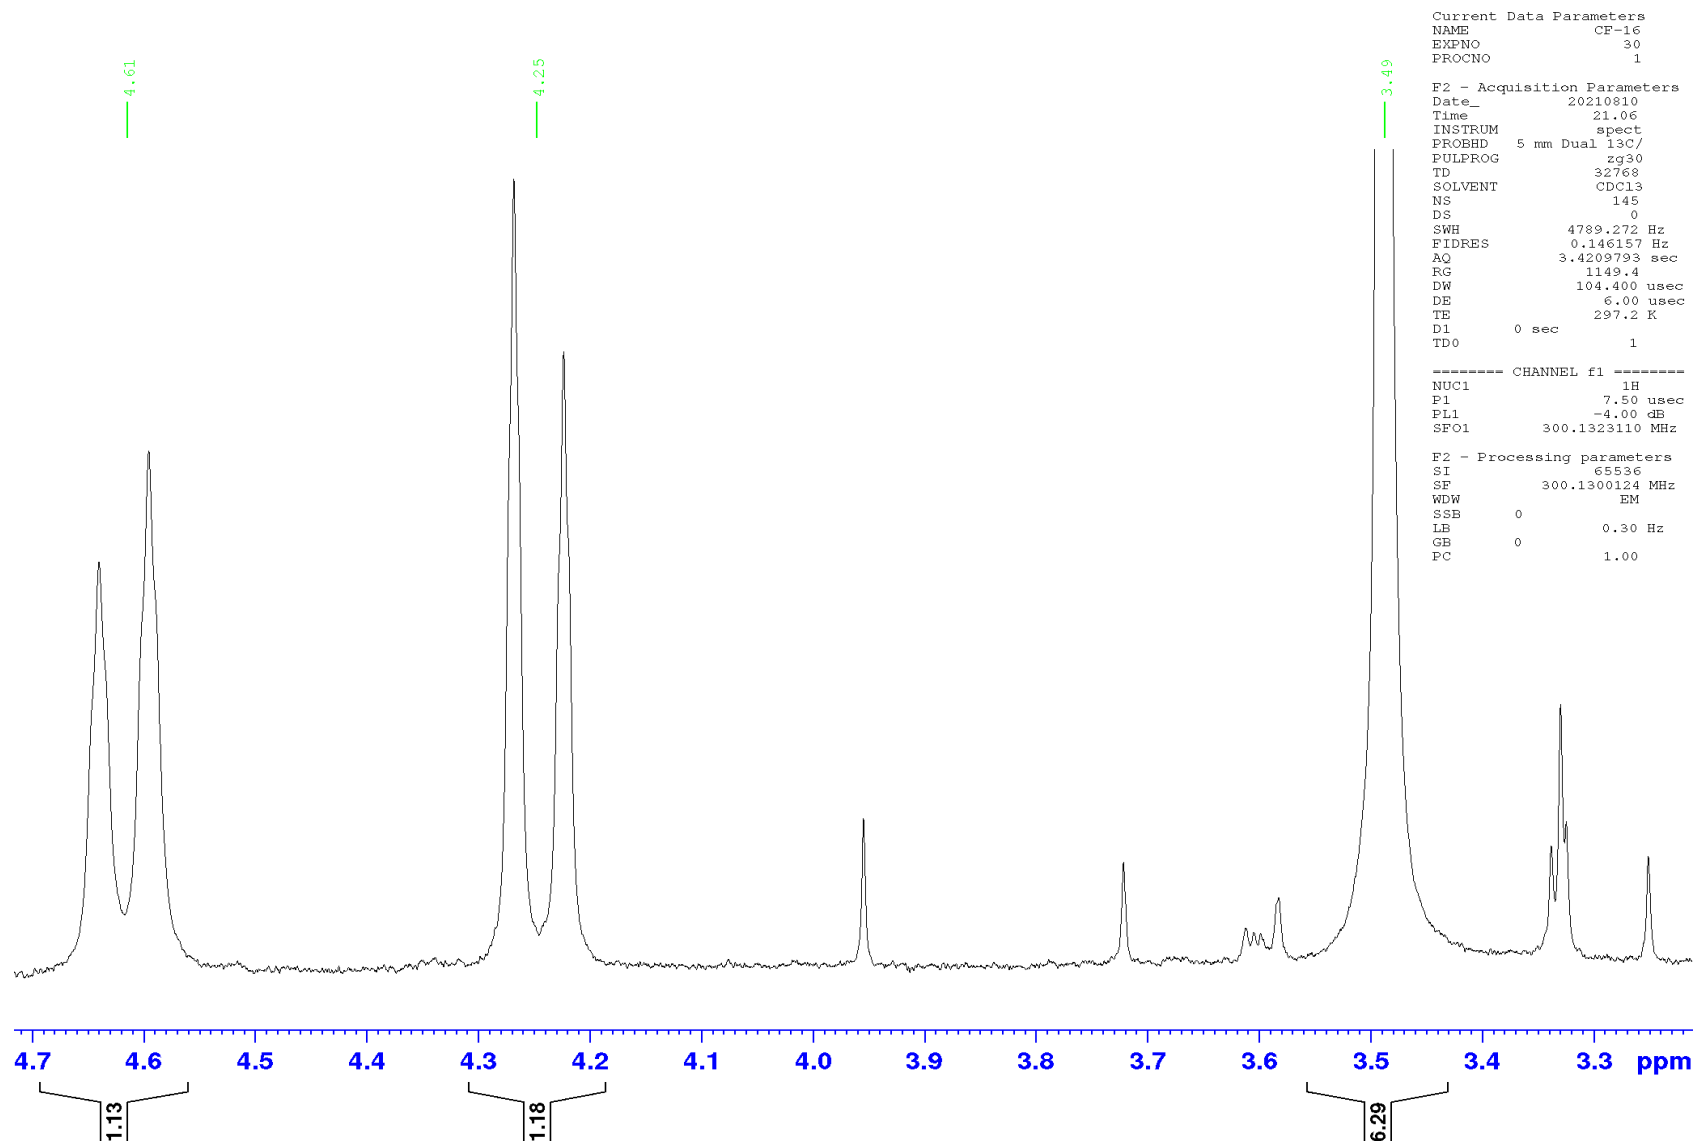

$^1\text{H}$  NMR spectrum (300 MHz,  $\text{CDCl}_3$ ) of **3** (expanded)

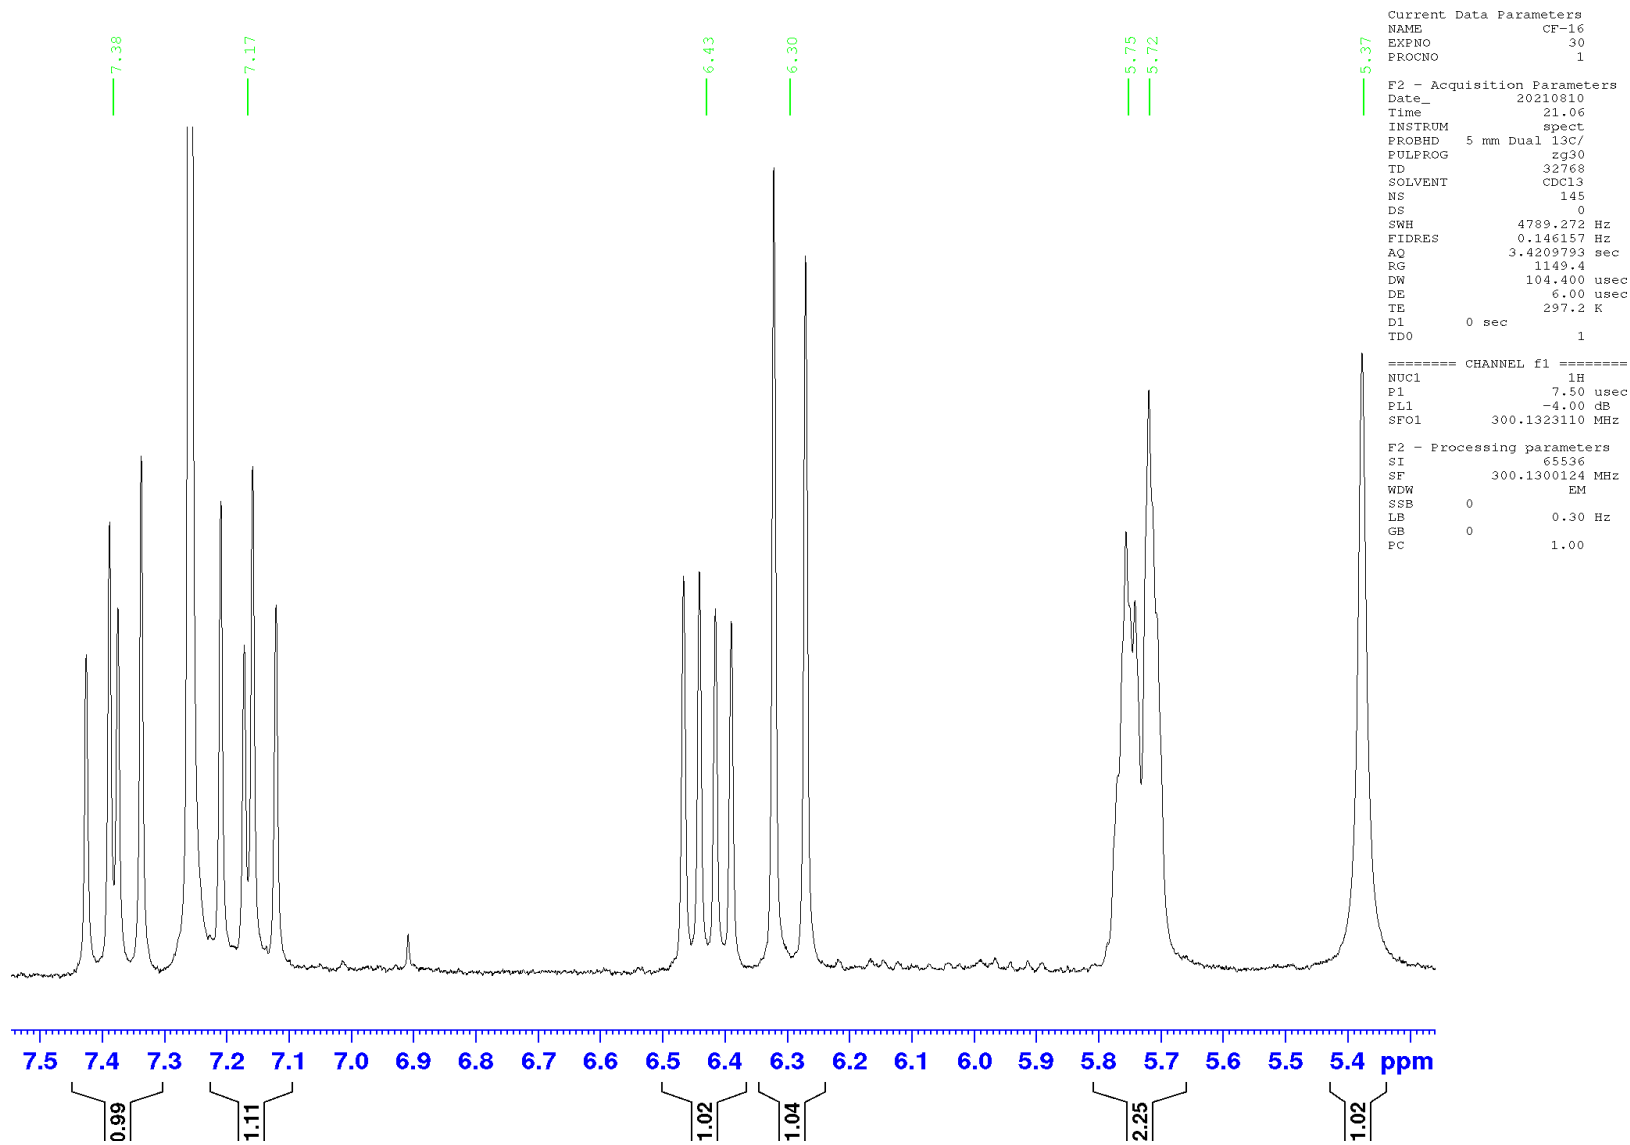

$^1\text{H}$  NMR spectrum (300 MHz,  $\text{CDCl}_3$ ) of **3** (expanded)

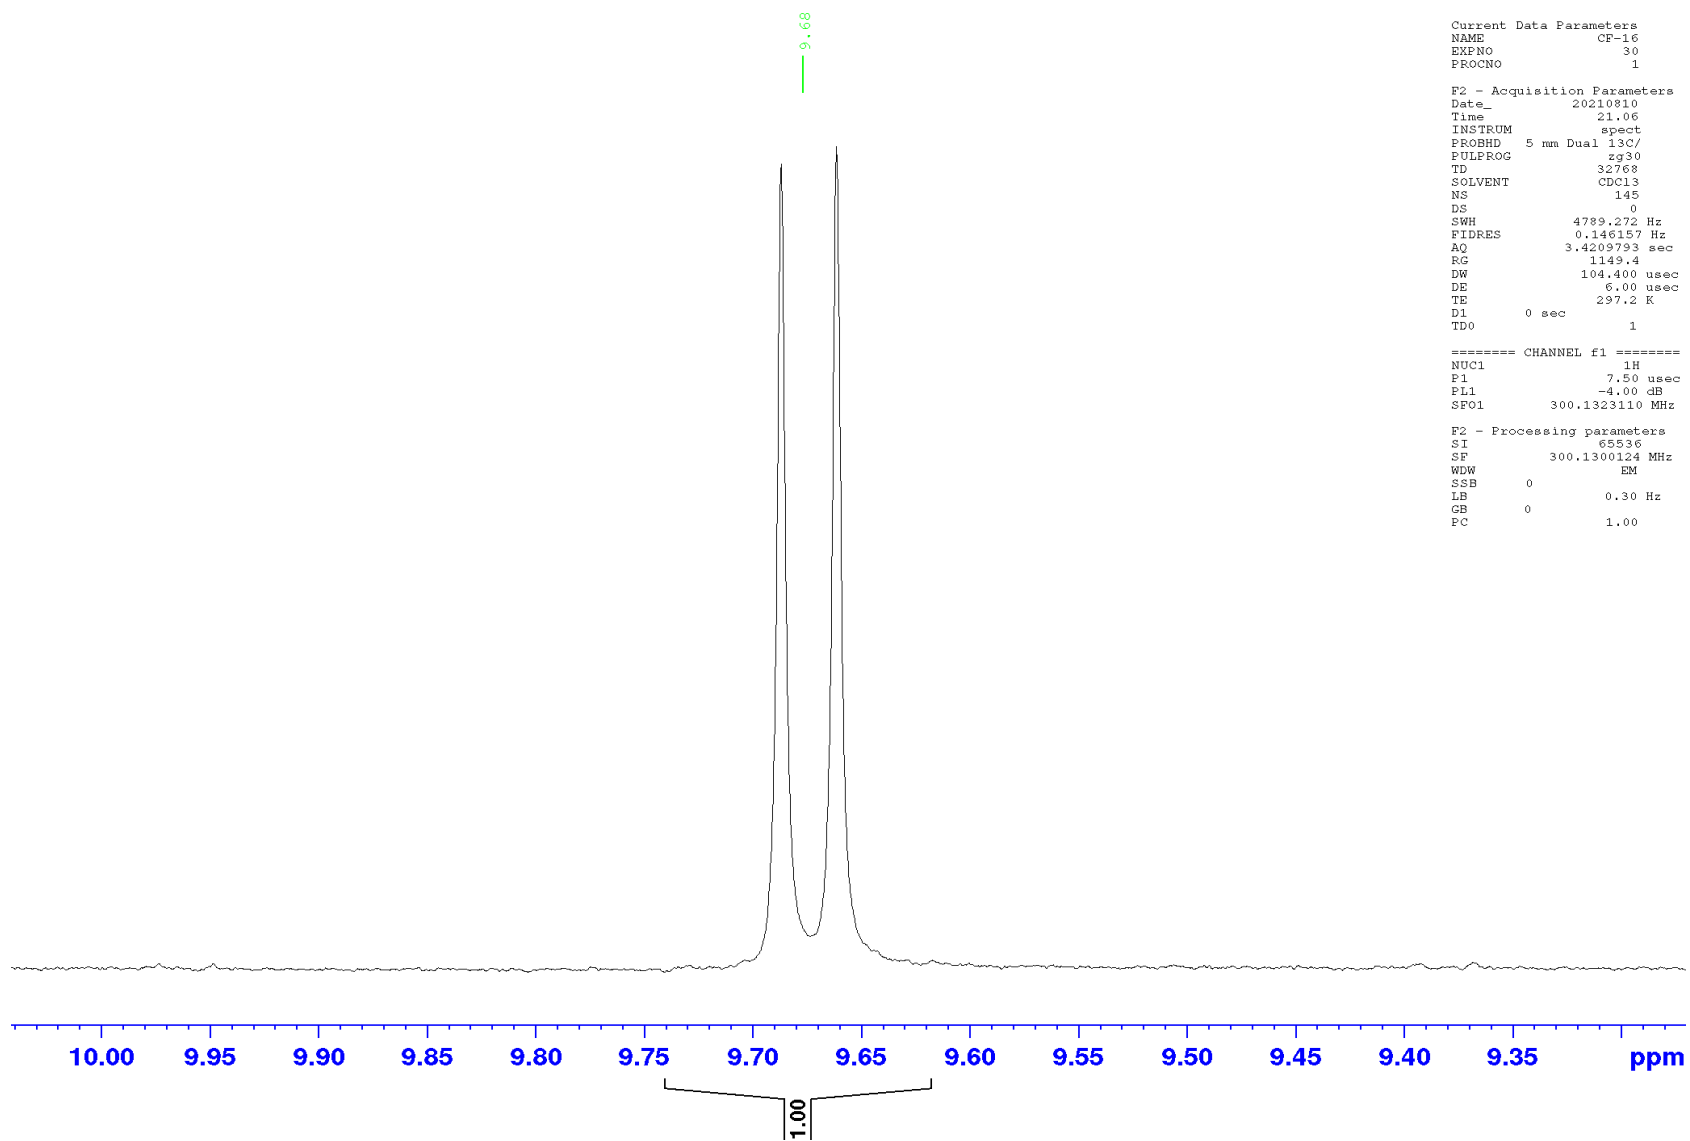

Current Data Parameters  
NAME CF-16  
EXPNO 30  
PROCNO 1

F2 - Acquisition Parameters  
Date\_ 20210810  
Time 21.06  
INSTRUM spect  
PROBHD 5 mm Dual 13C/  
PULPROG zg30  
TD 32768  
SOLVENT CDCl3  
NS 145  
DS 0  
SWH 4789.272 Hz  
FIDRES 0.146157 Hz  
AQ 3.4209793 sec  
RG 1149.4  
DW 104.400 usec  
DE 6.00 usec  
TE 297.2 K  
D1 0 sec  
TD0 1

===== CHANNEL f1 =====  
NUC1 1H  
P1 7.50 usec  
PL1 -4.00 dB  
SFO1 300.1323110 MHz

F2 - Processing parameters  
SI 65536  
SF 300.1300124 MHz  
WDW EM  
SSB 0  
LB 0.30 Hz  
GB 0  
FC 1.00

$^1\text{H}$  NMR spectrum (300 MHz,  $\text{CDCl}_3$ ) of **3** (expanded)

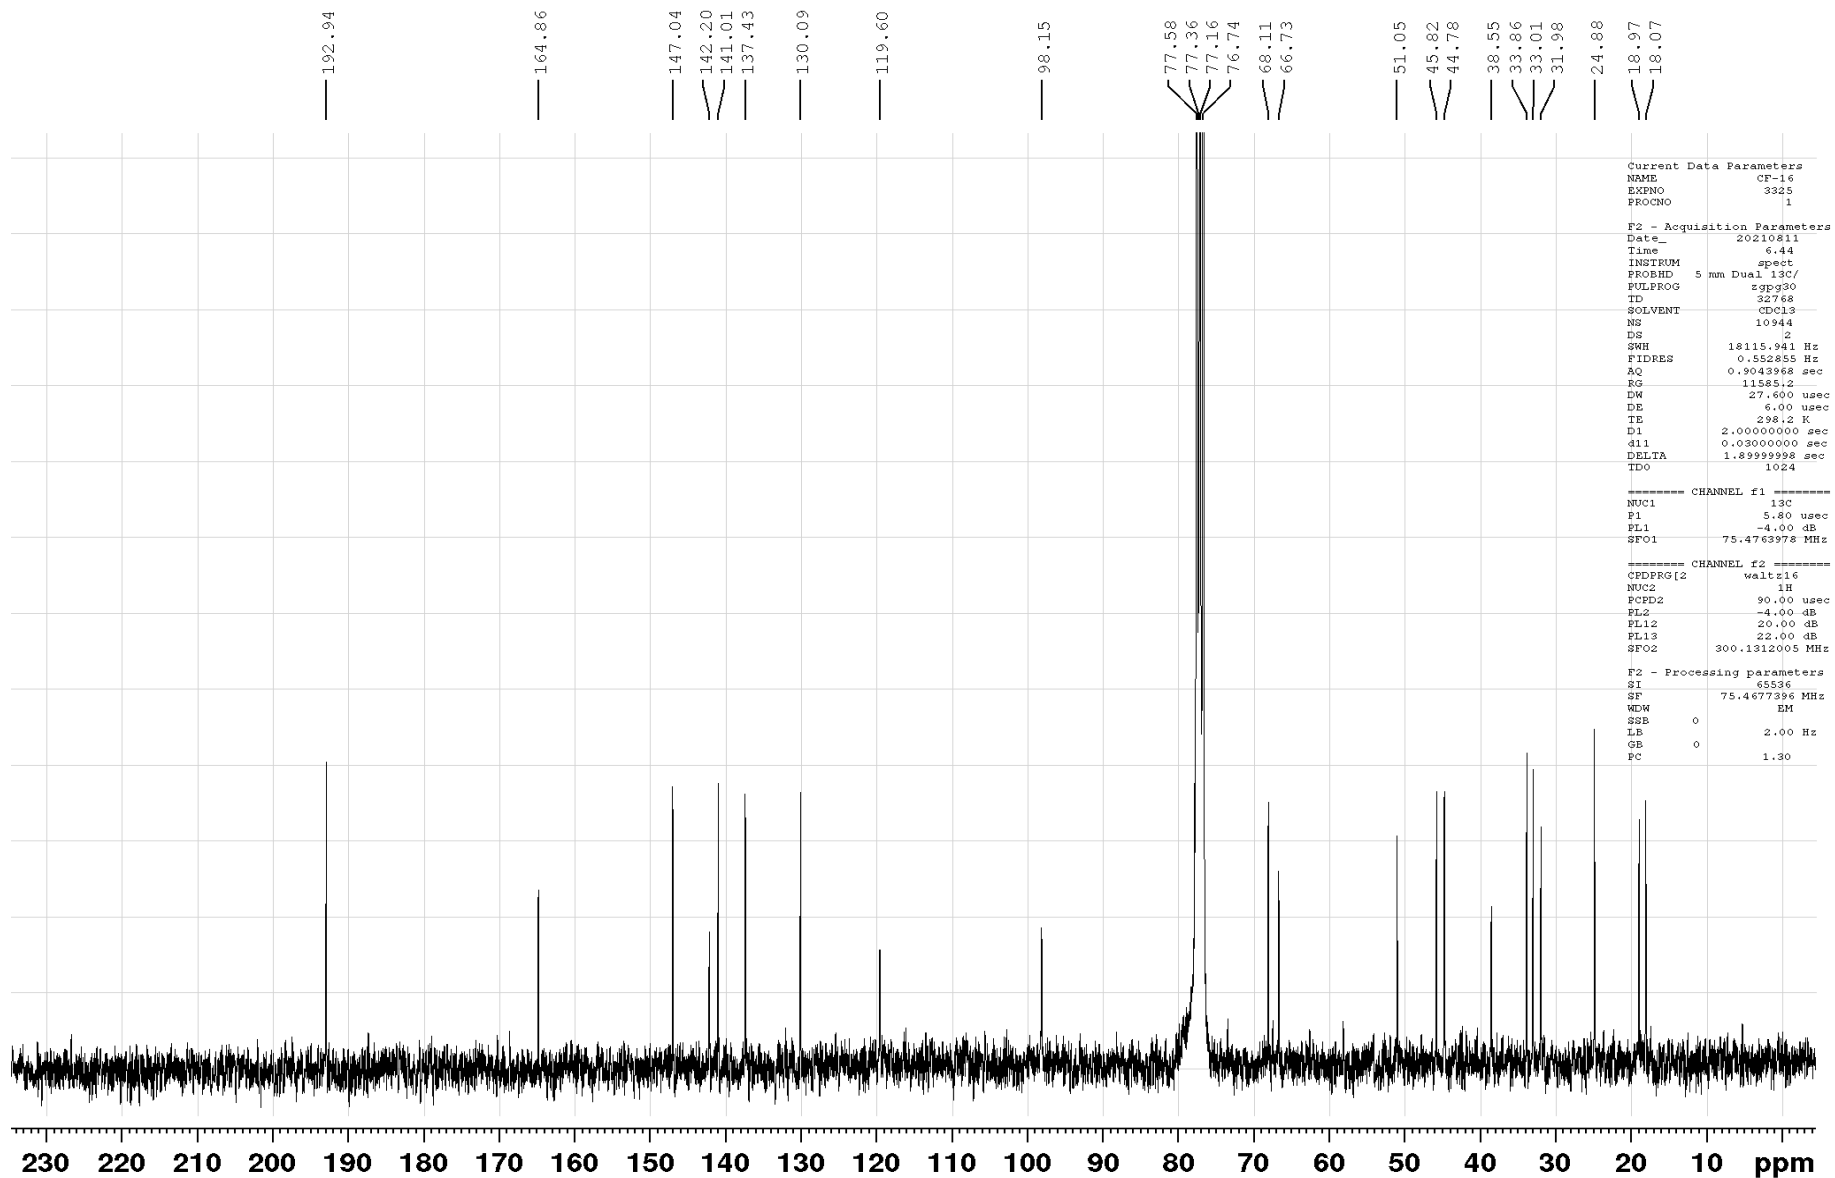

Figure S29.  $^{13}\text{C}$  NMR spectrum (75 MHz,  $\text{CDCl}_3$ ) of **3**

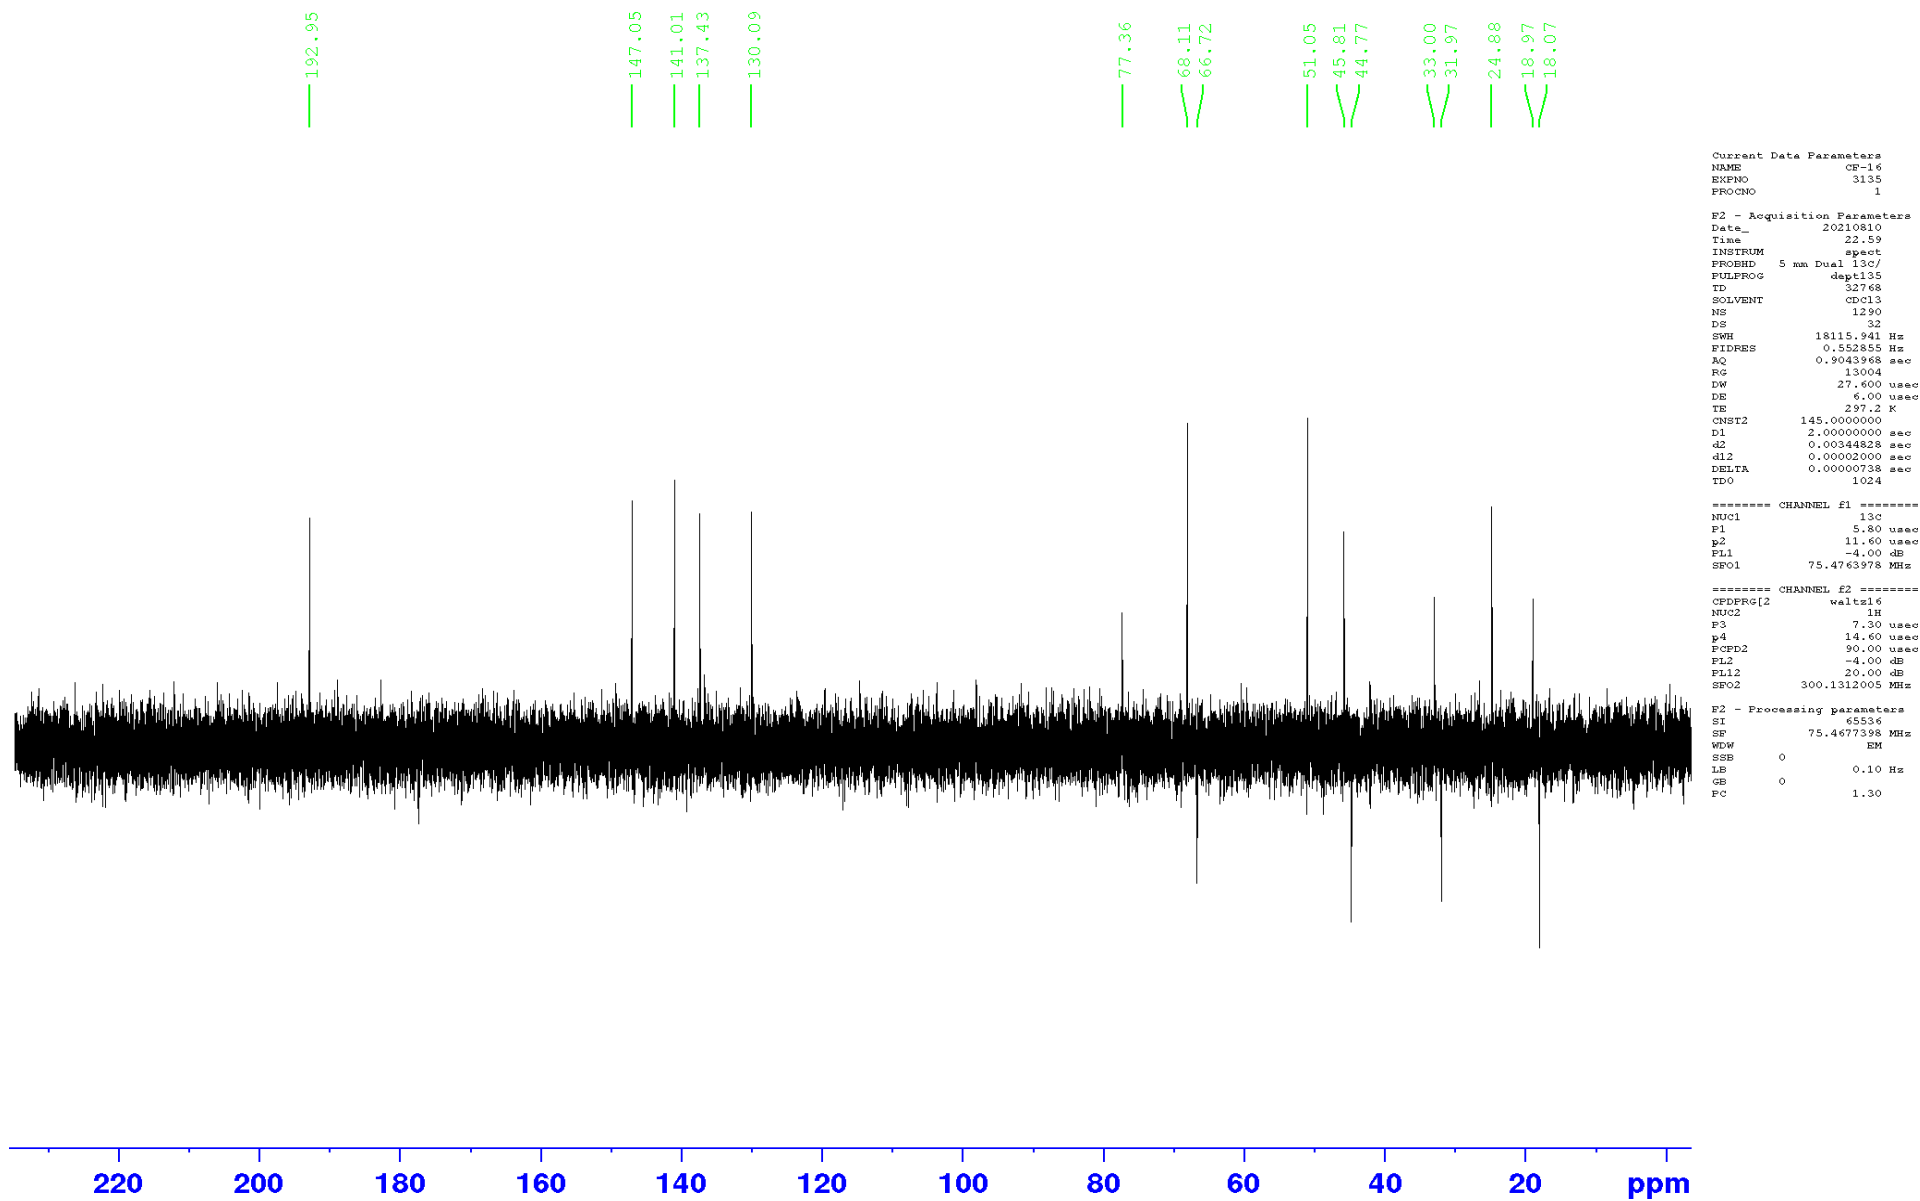

Figure S30. DEPT-135 NMR spectrum (75 MHz, CDCl<sub>3</sub>) of **3**

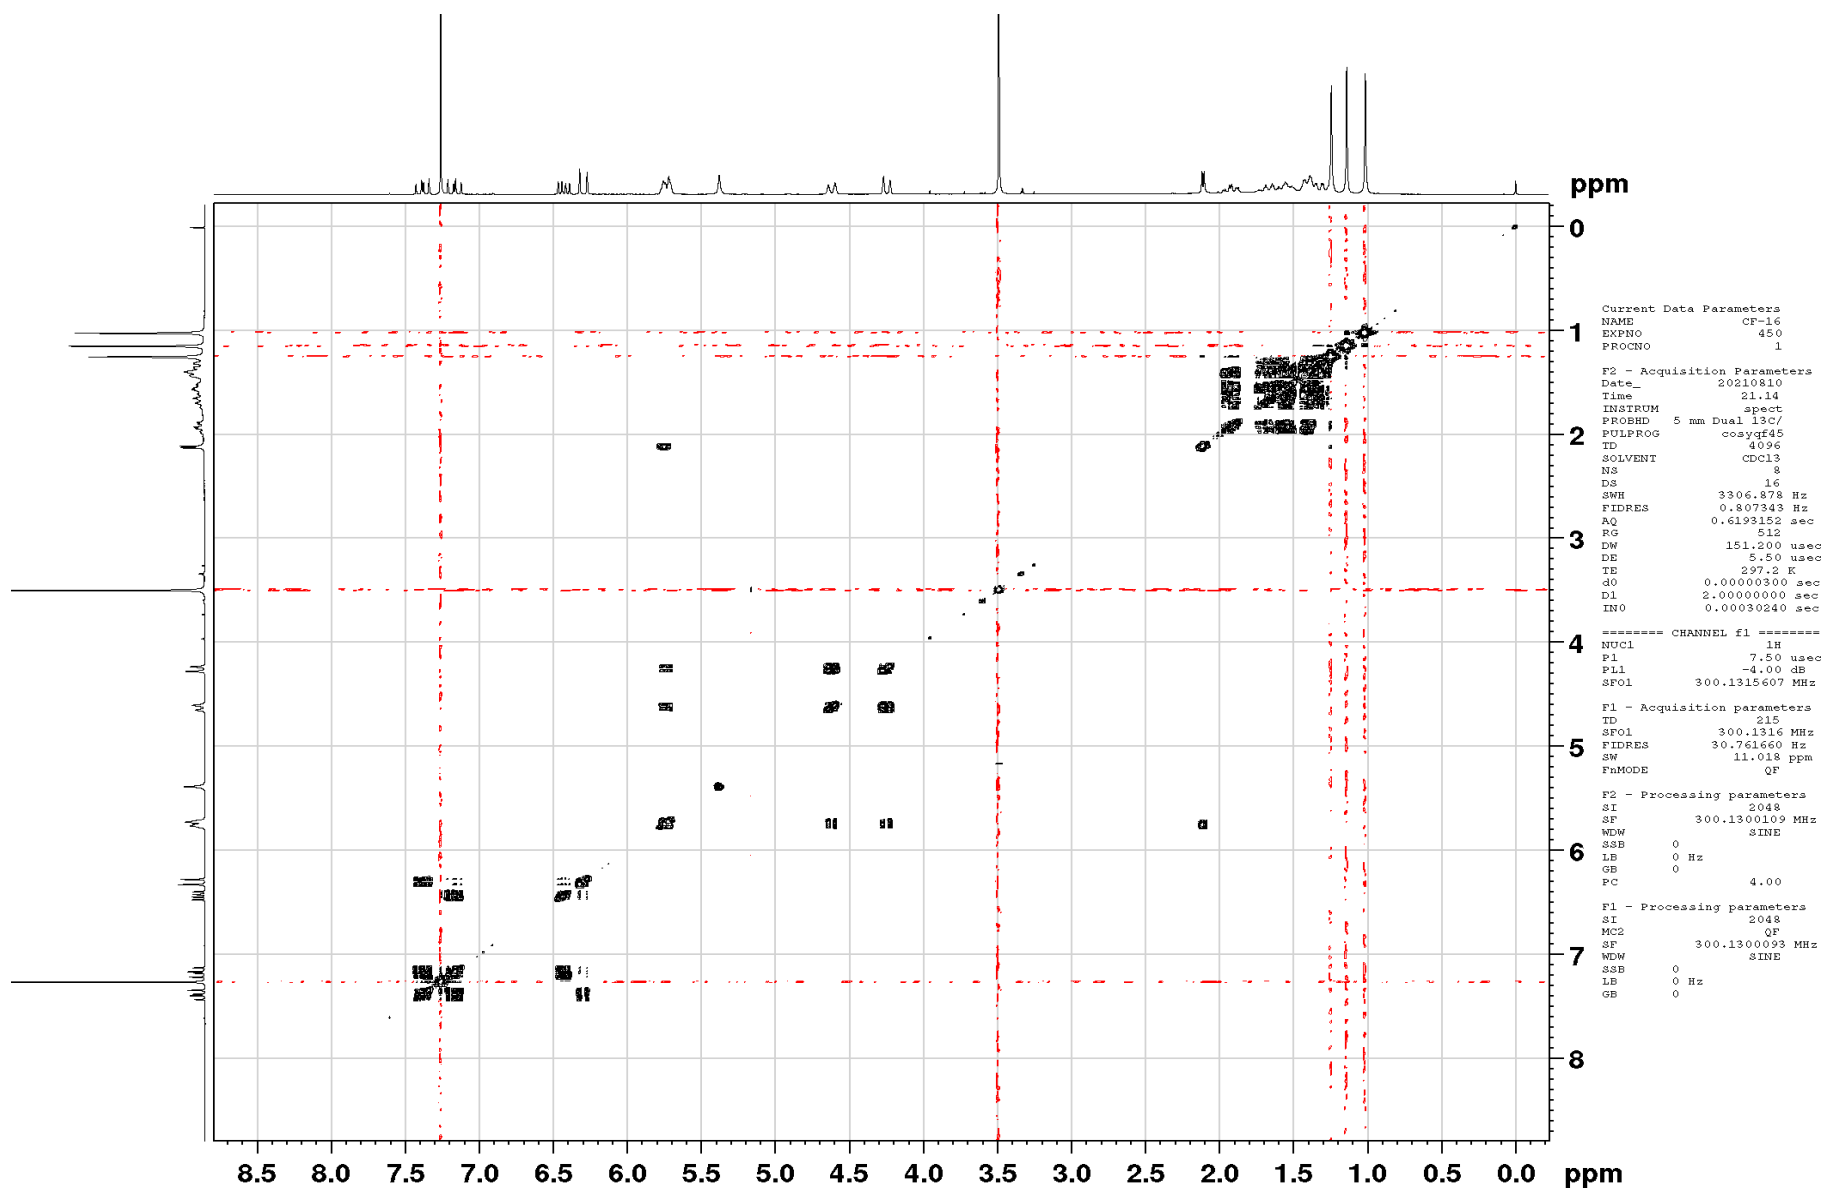

Figure S31. COSY-45 spectrum (300 MHz,  $\text{CDCl}_3$ ) of **3**

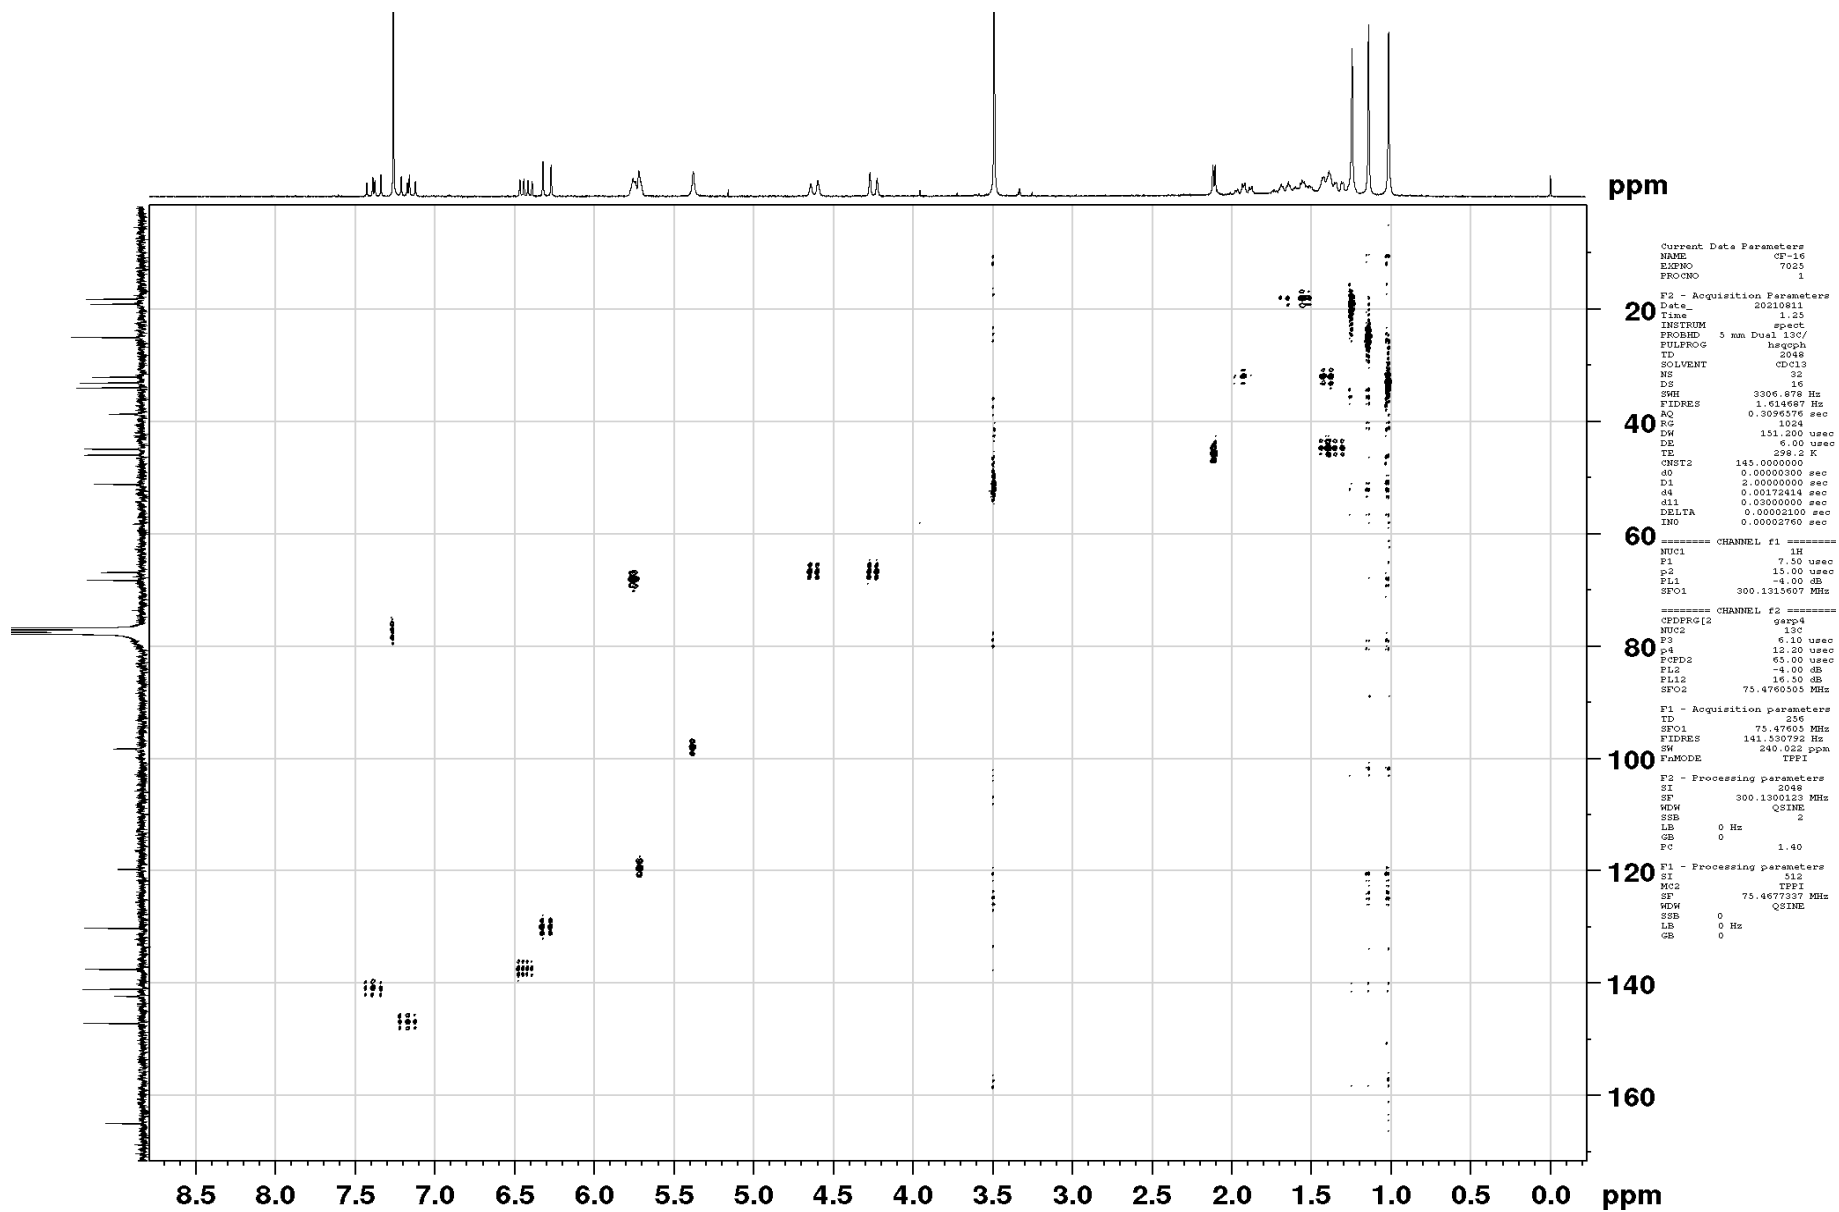

Figure S32. HSQC spectrum (300 MHz,  $\text{CDCl}_3$ ) of **3**

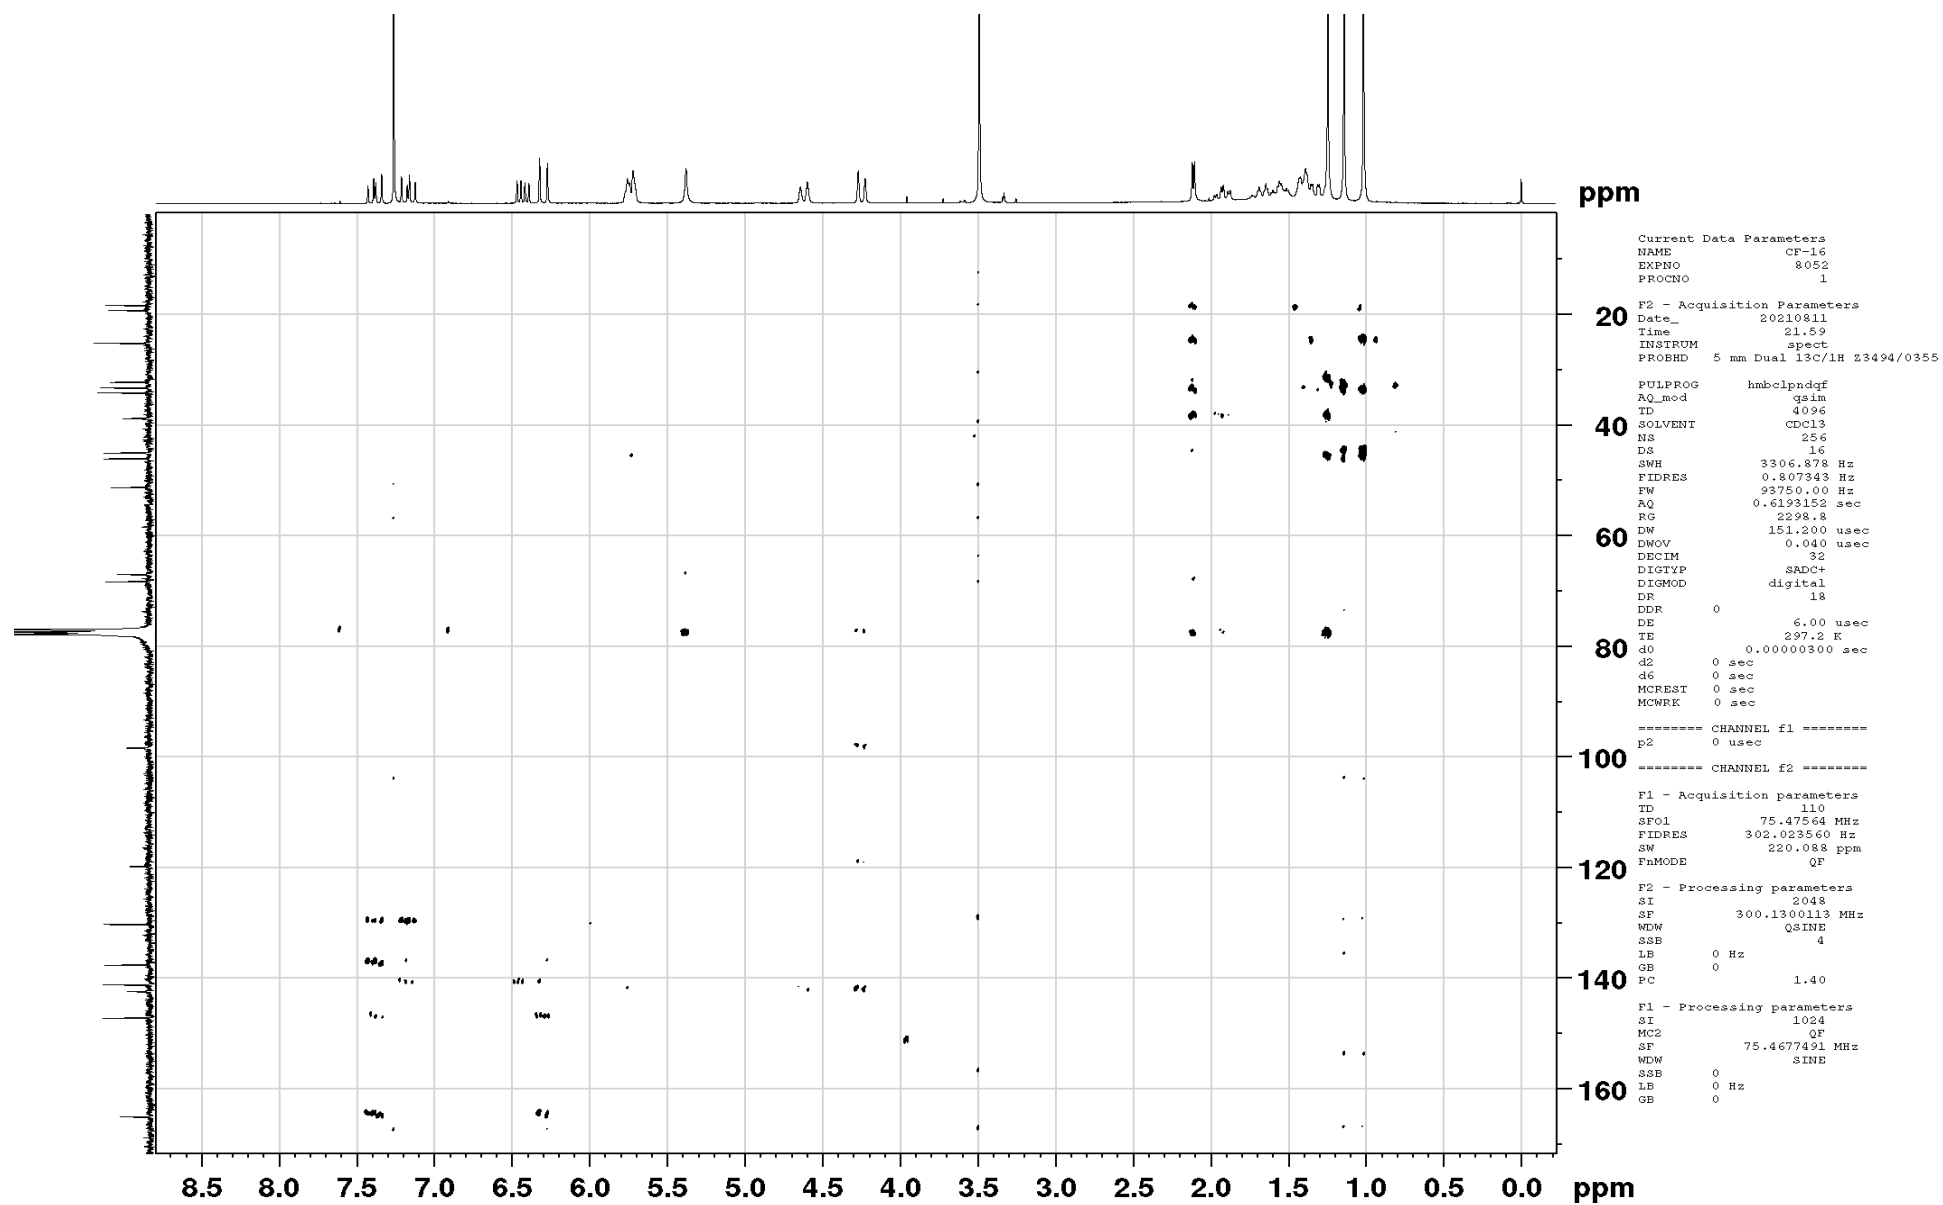

Figure S33. HMBC spectrum (300 MHz,  $\text{CDCl}_3$ ) of **3**

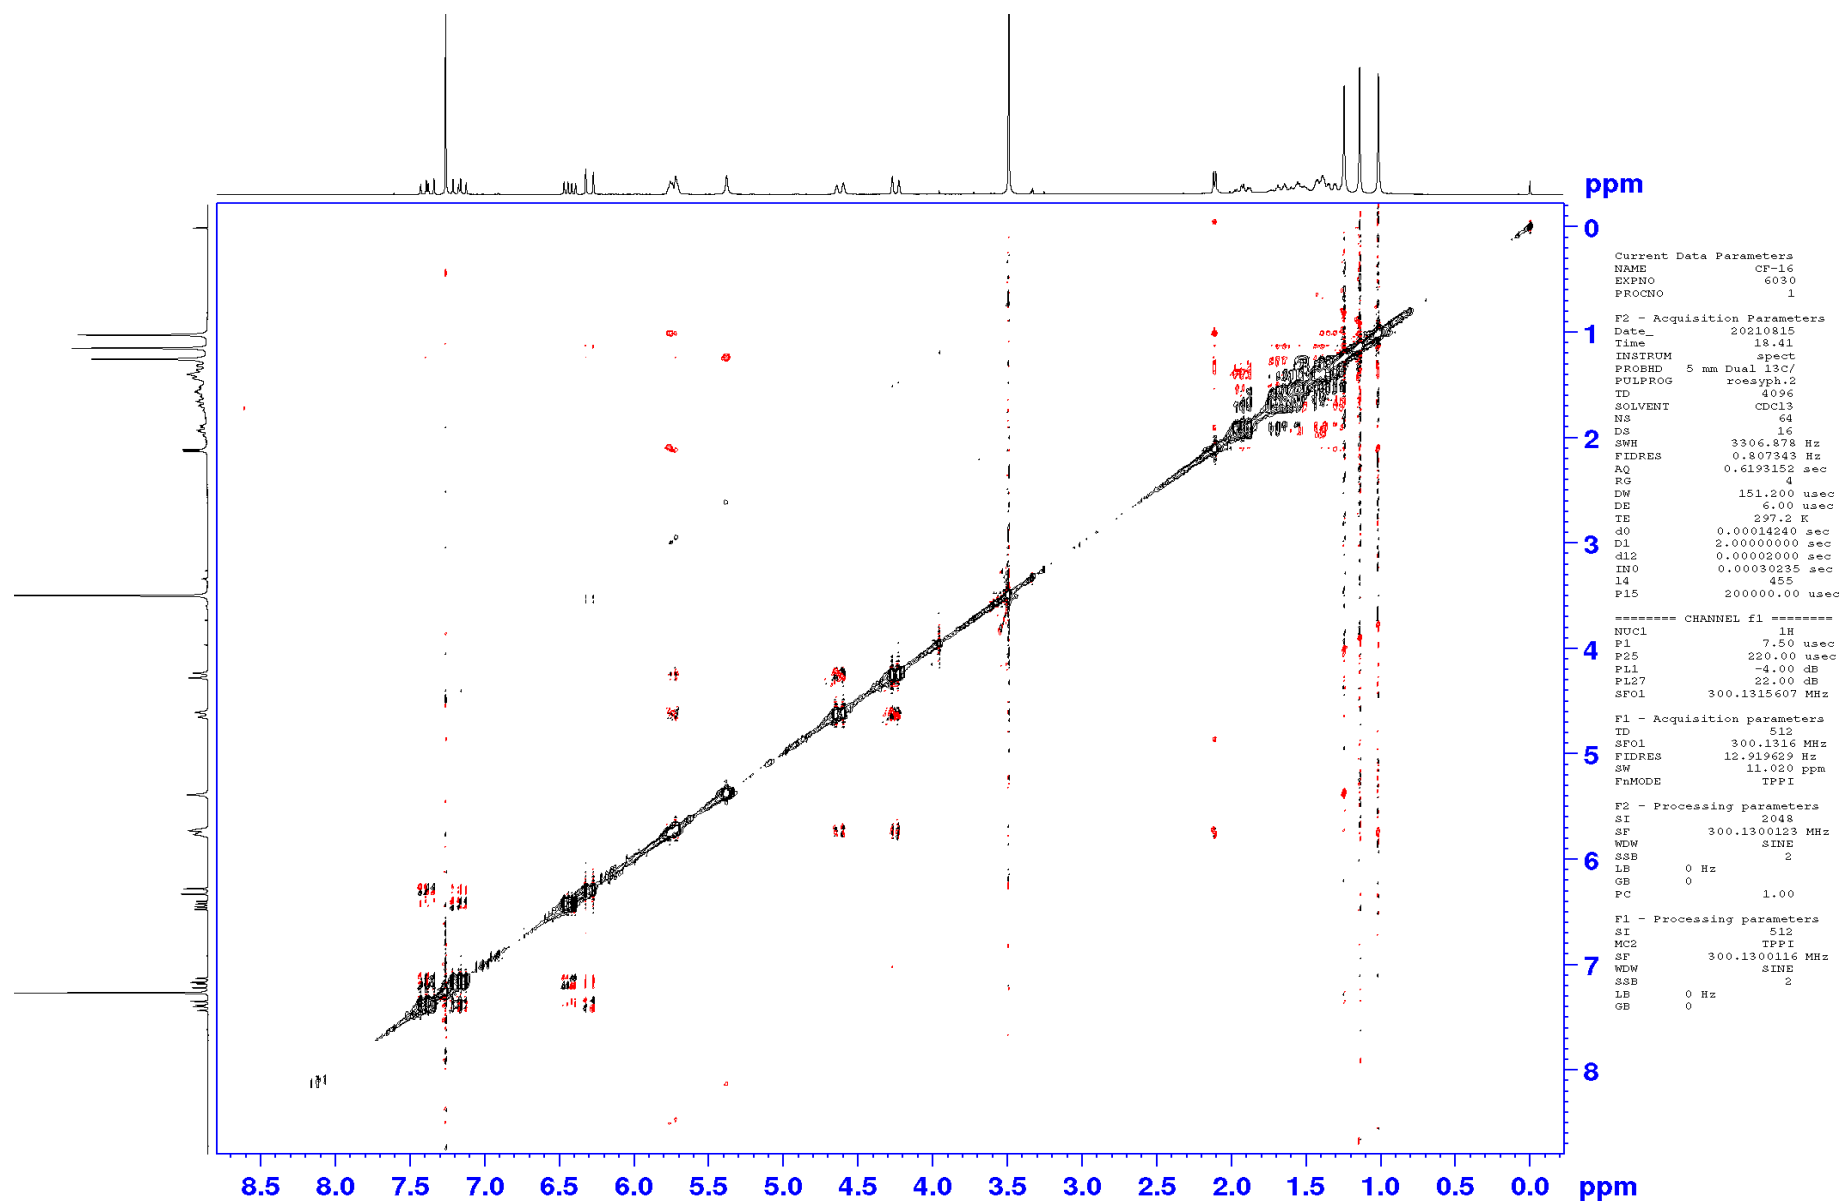

Figure S34. ROESY spectrum (300 MHz, CDCl<sub>3</sub>) of **3**

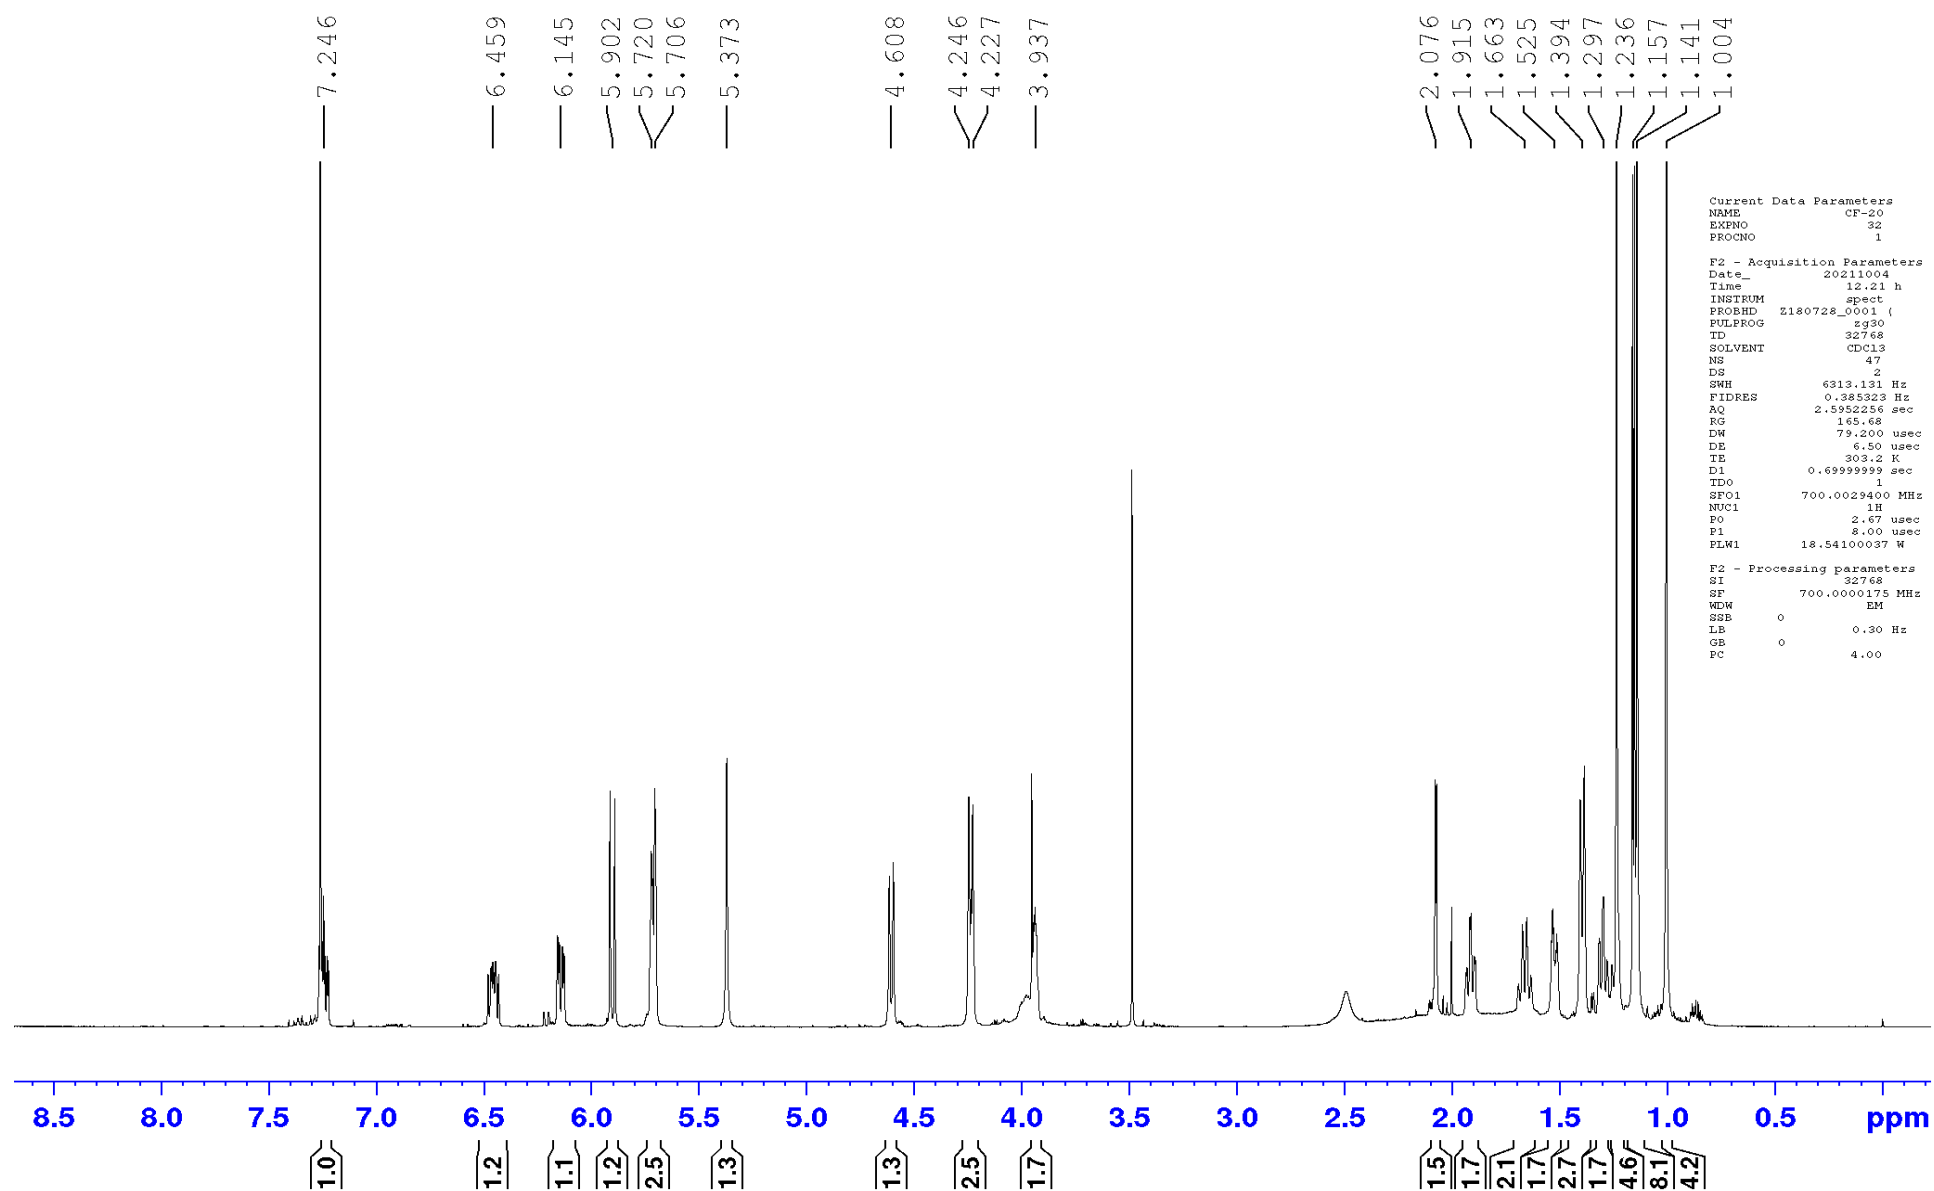

Figure S35.  $^1\text{H}$  NMR spectrum (700 MHz,  $\text{CDCl}_3$ ) of **4**

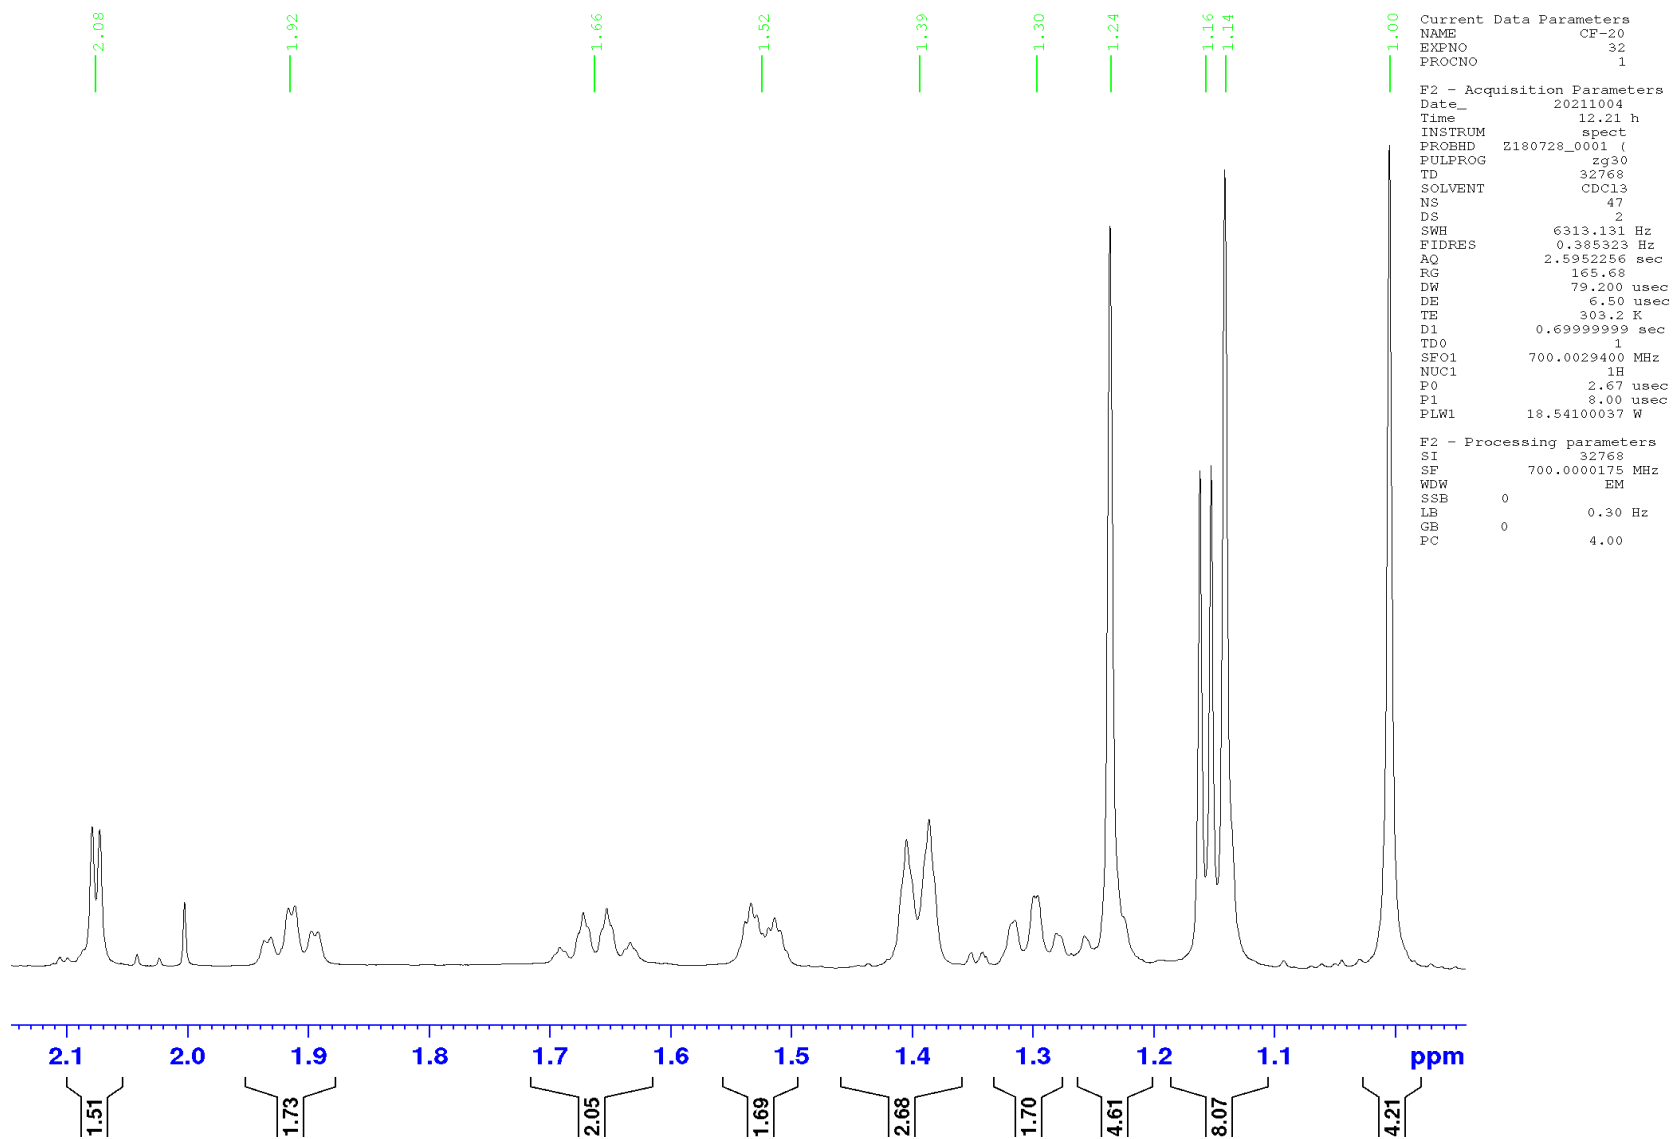

$^1\text{H}$  NMR spectrum (700 MHz,  $\text{CDCl}_3$ ) of **4** (expanded)

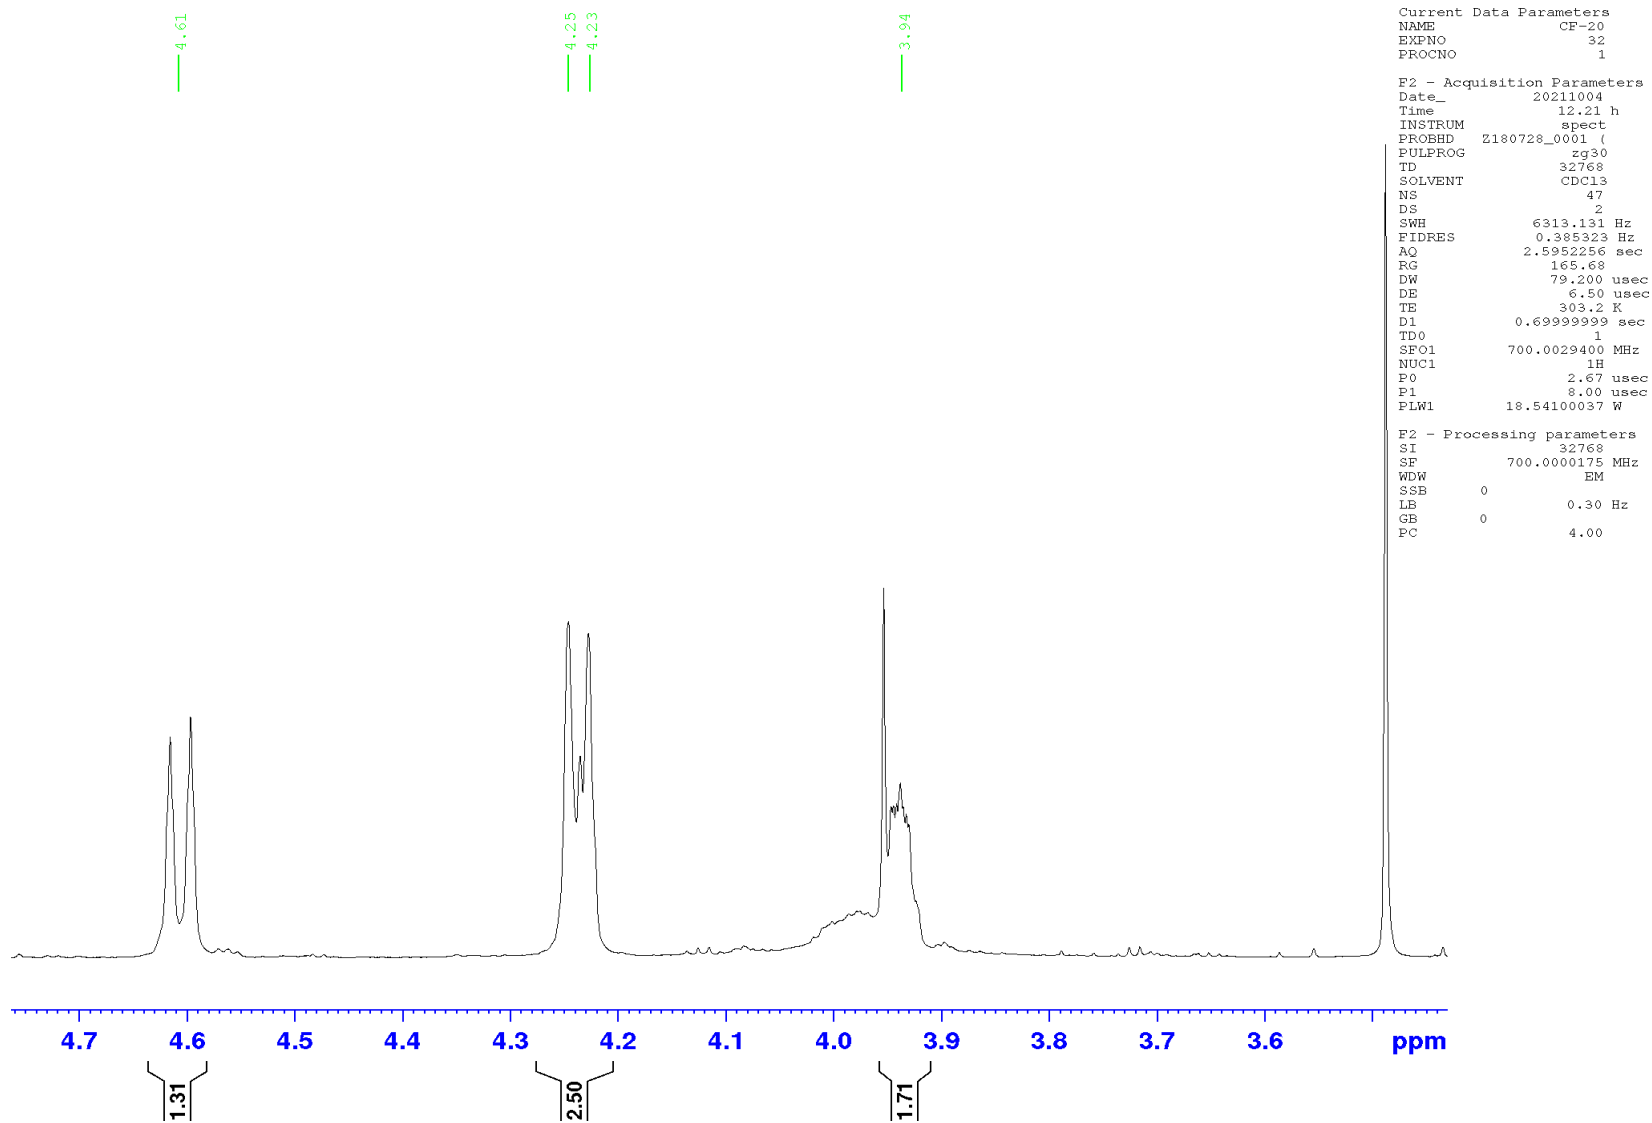

$^1\text{H}$  NMR spectrum (700 MHz,  $\text{CDCl}_3$ ) of **4** (expanded)

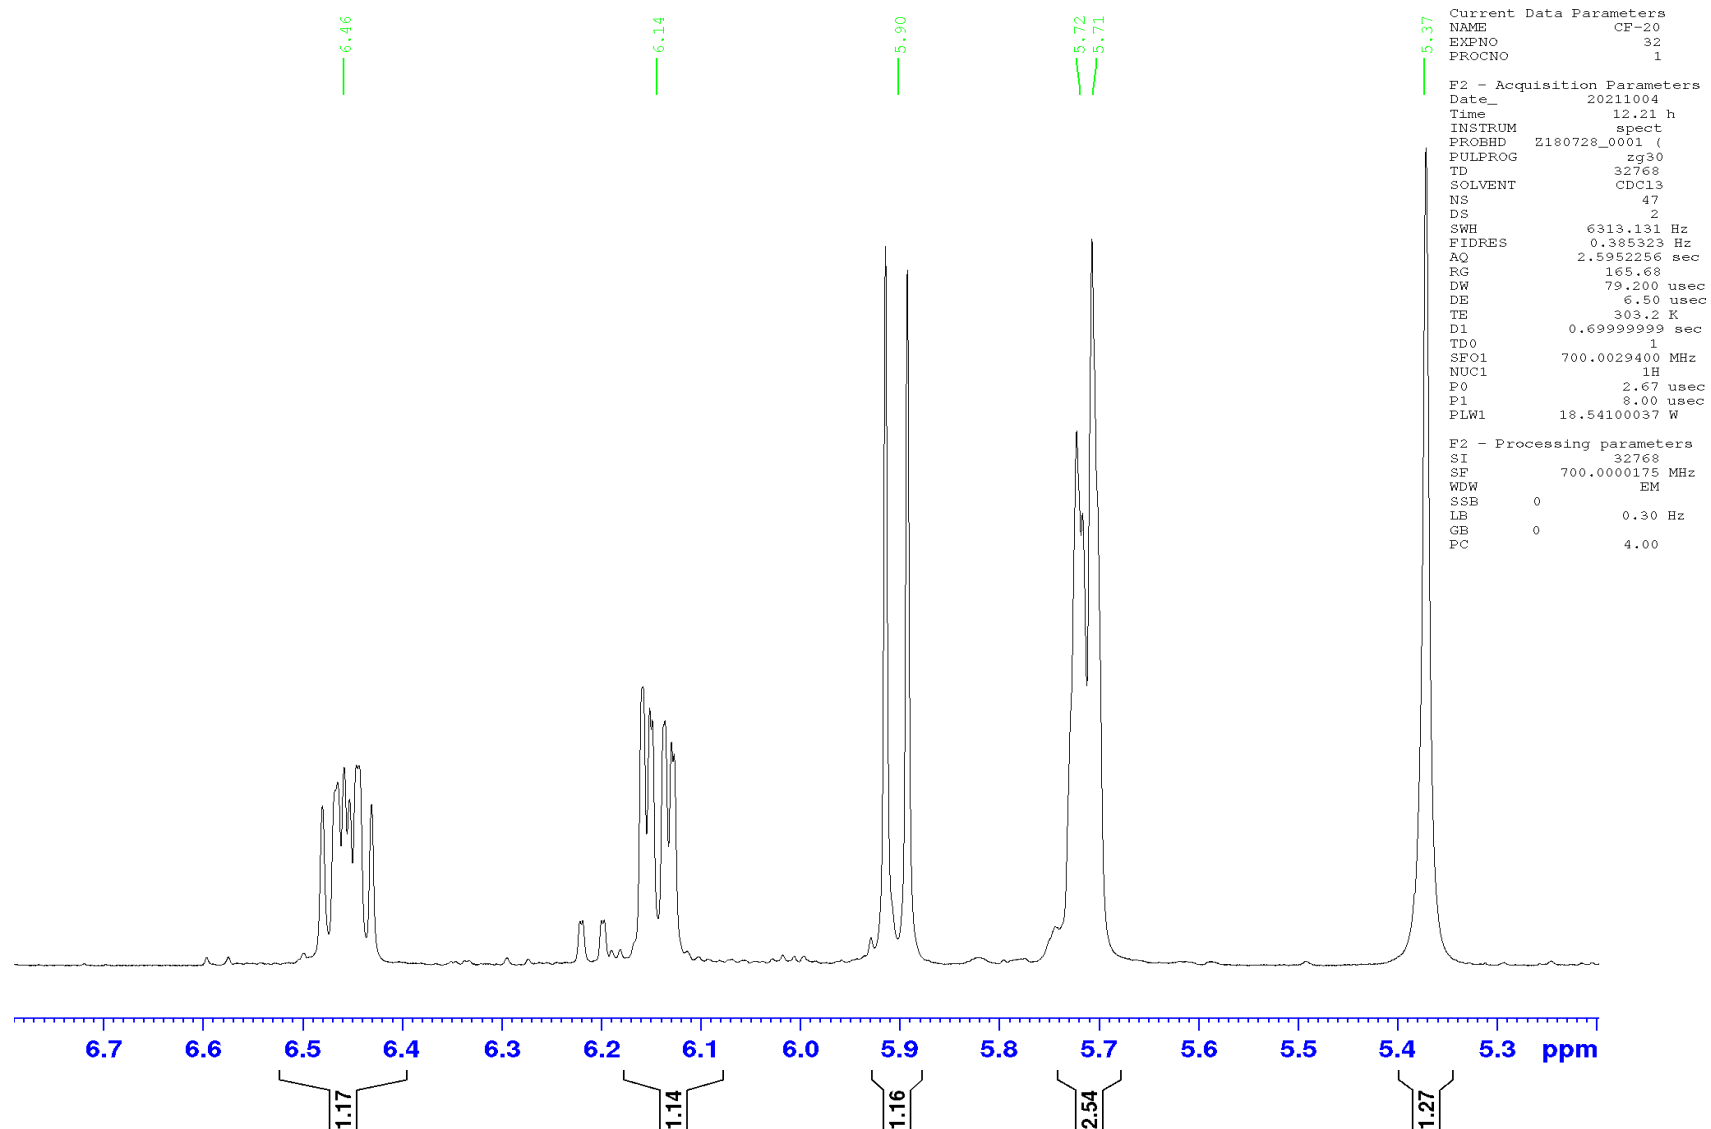

$^1\text{H}$  NMR spectrum (700 MHz,  $\text{CDCl}_3$ ) of **4** (expanded)

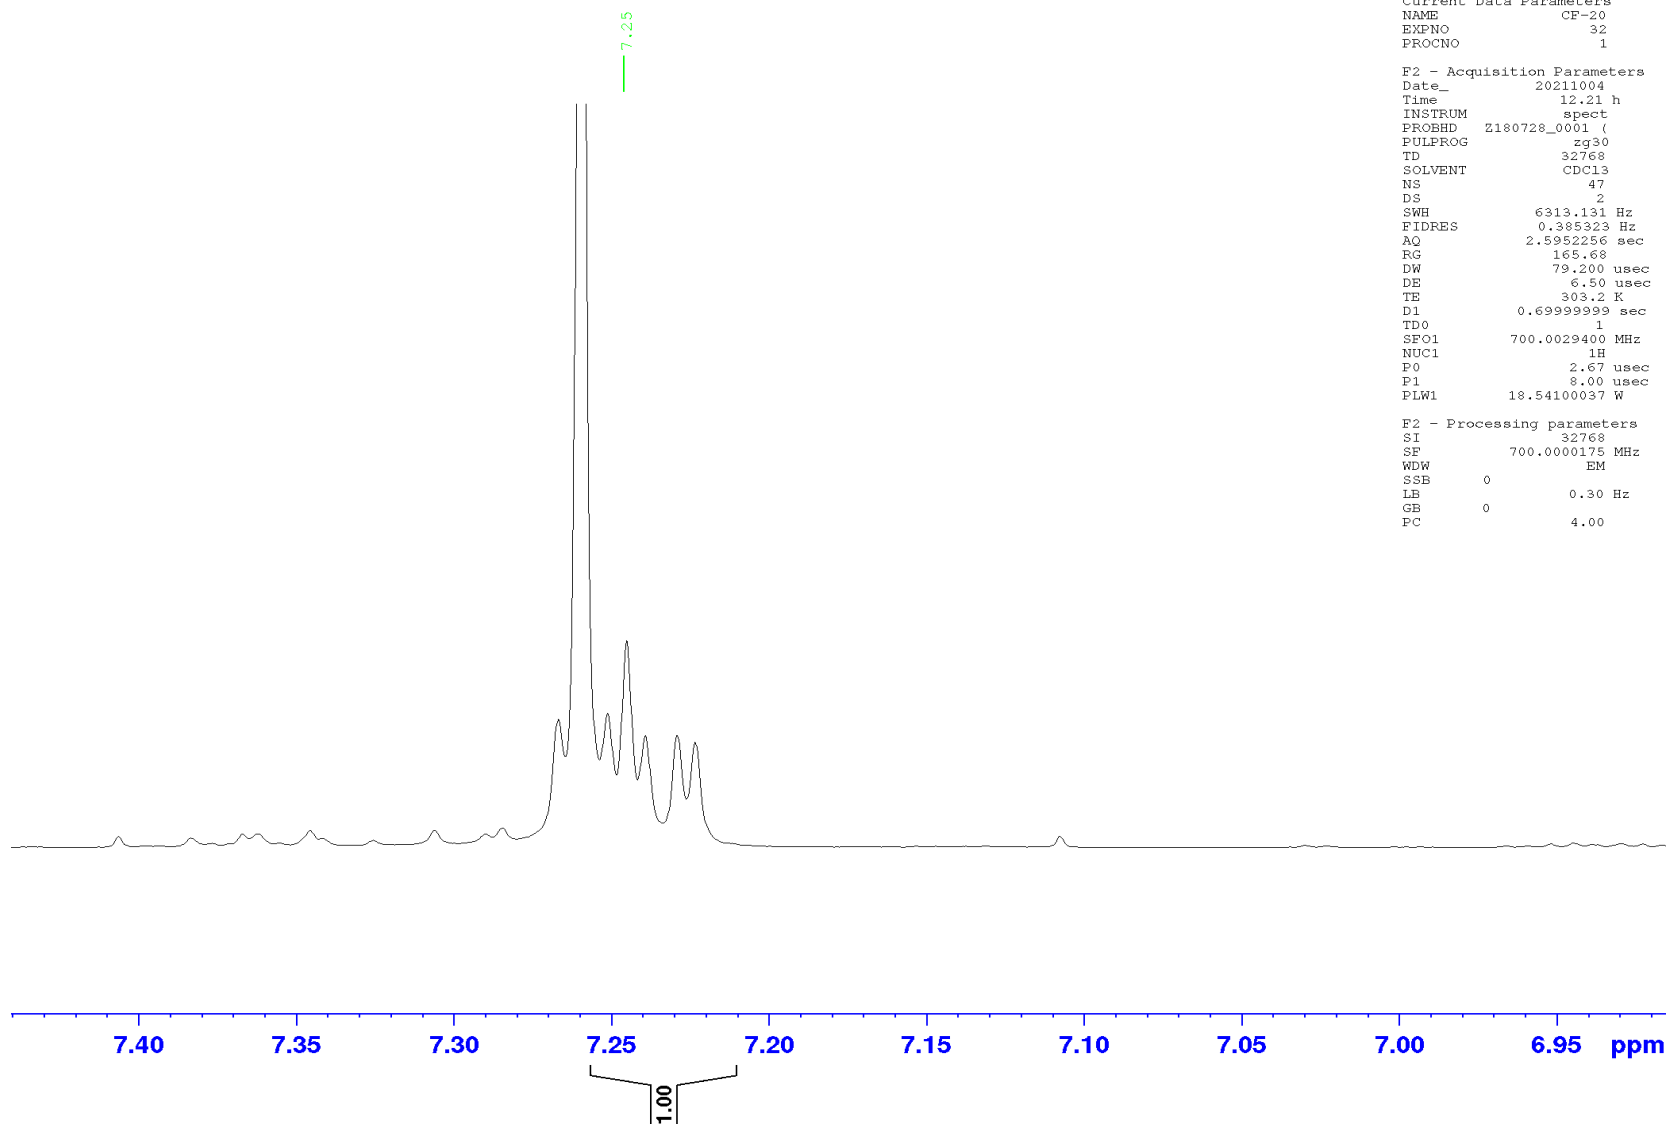

$^1\text{H}$  NMR spectrum (700 MHz,  $\text{CDCl}_3$ ) of **4** (expanded)

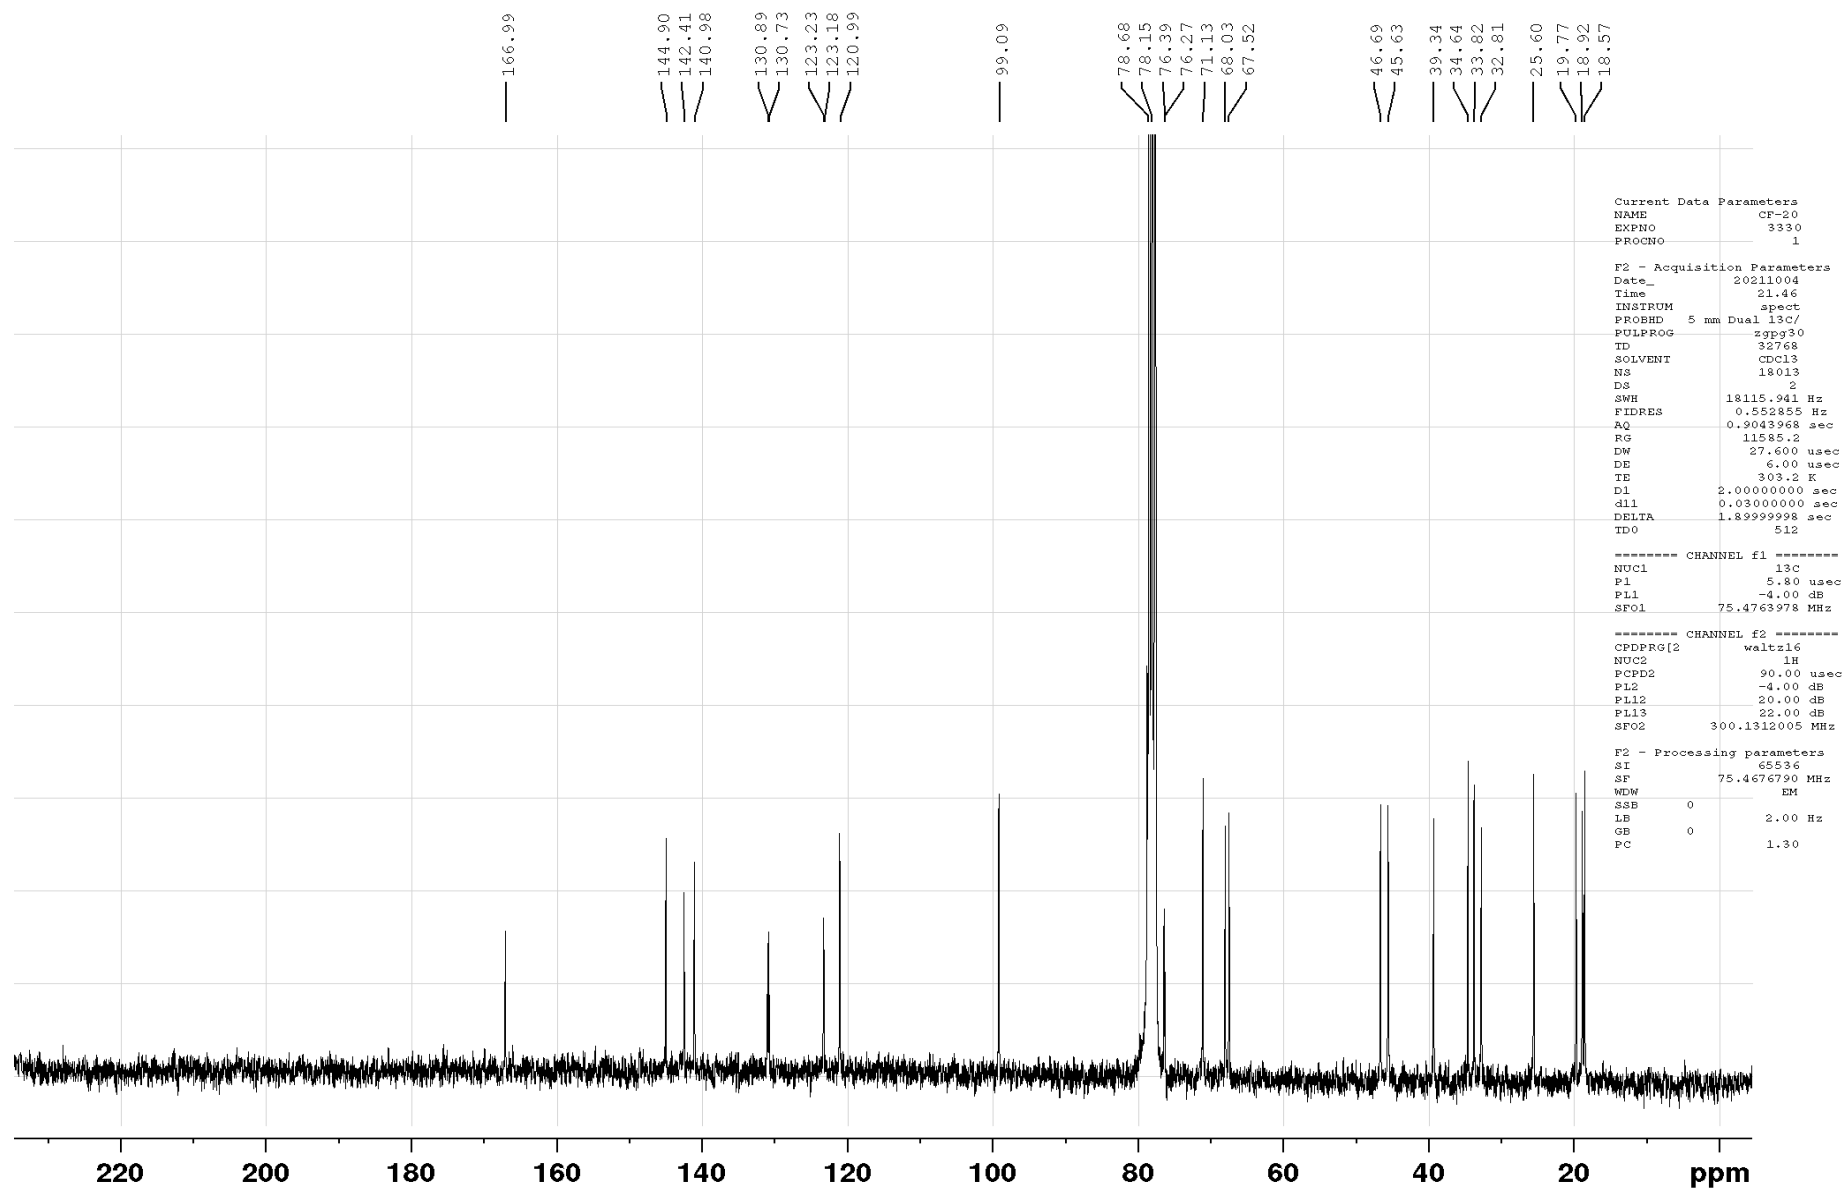

Figure S36.  $^{13}\text{C}$  NMR spectrum (75 MHz,  $\text{CDCl}_3$ ) of **4**

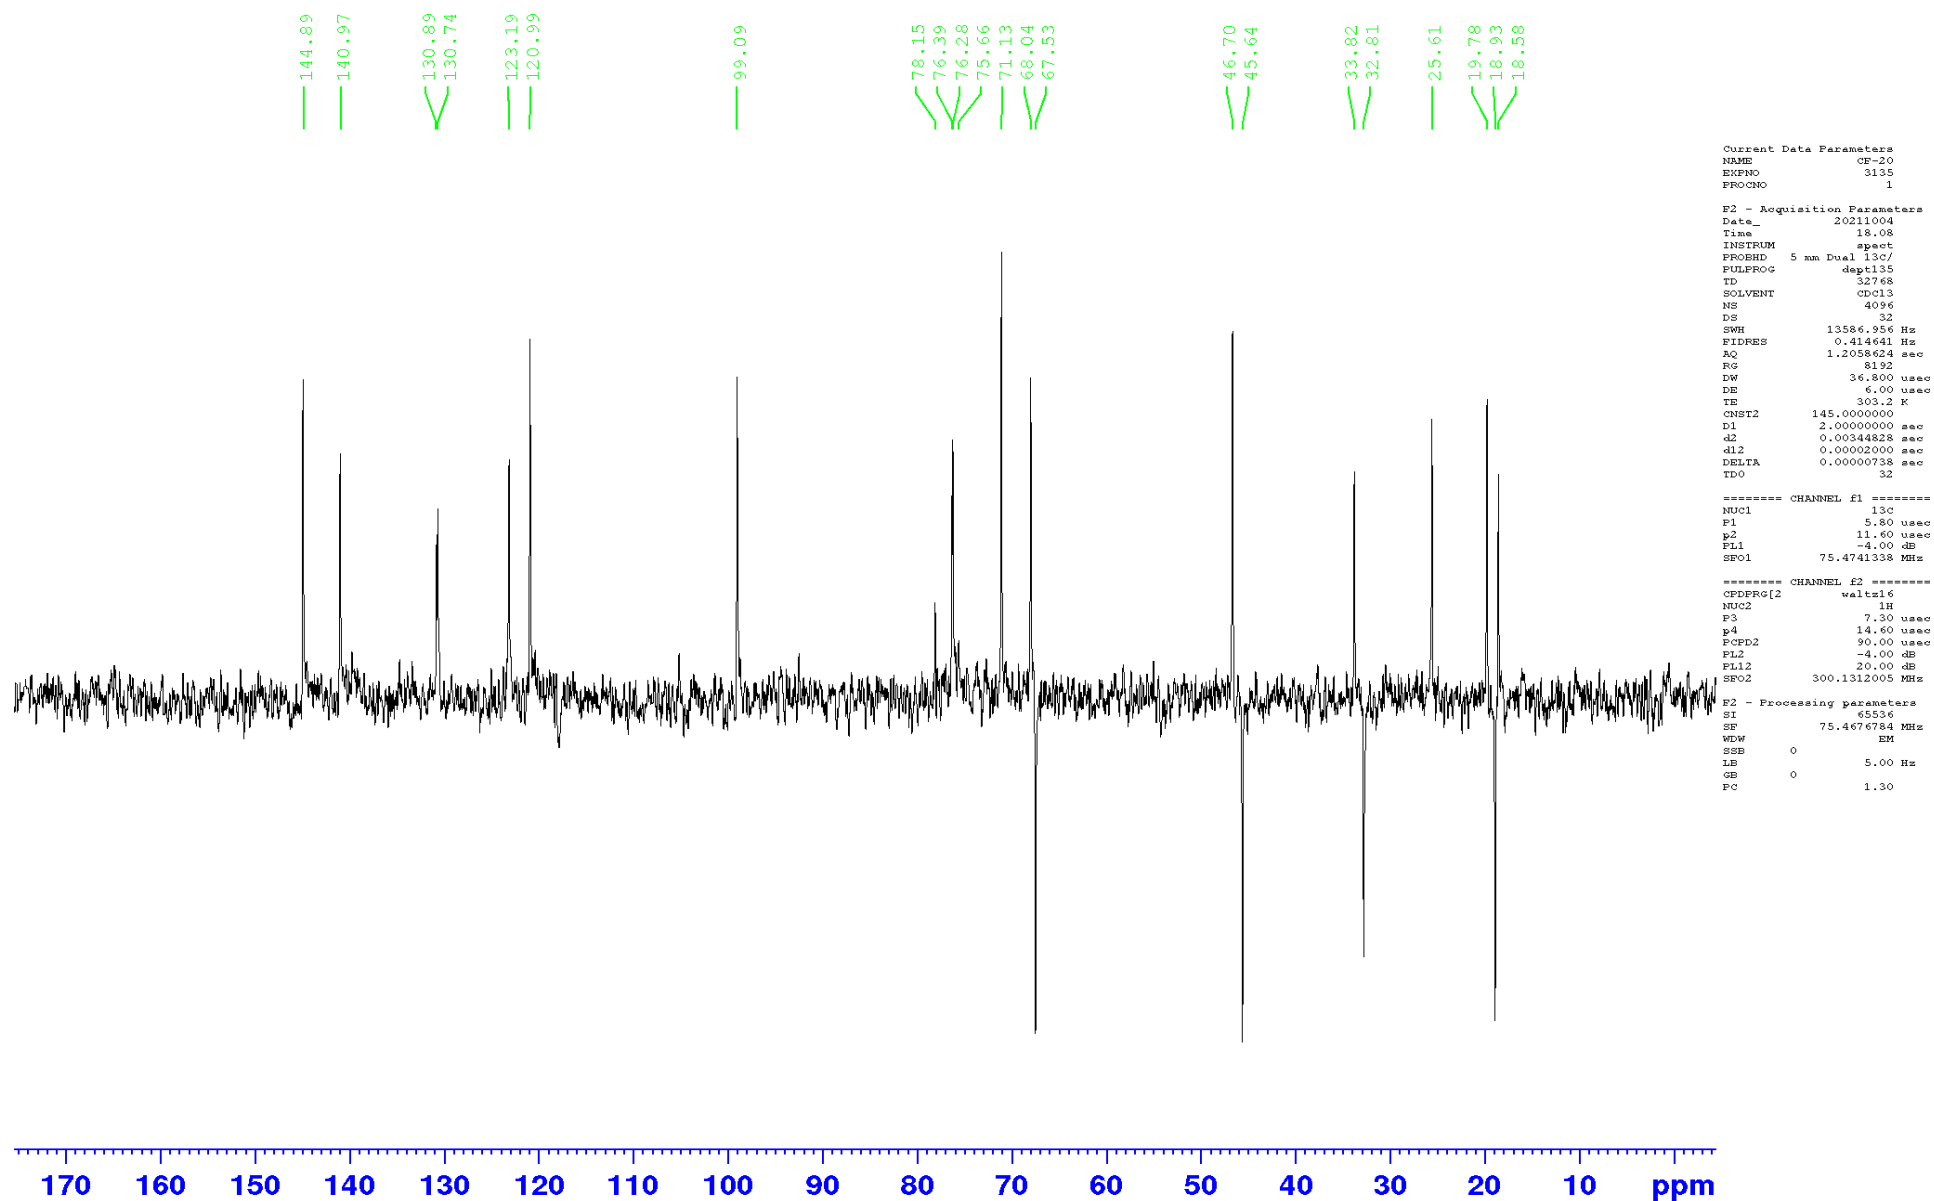

Figure S37. DEPT-135 NMR spectrum (75 MHz,  $\text{CDCl}_3$ ) of **4**

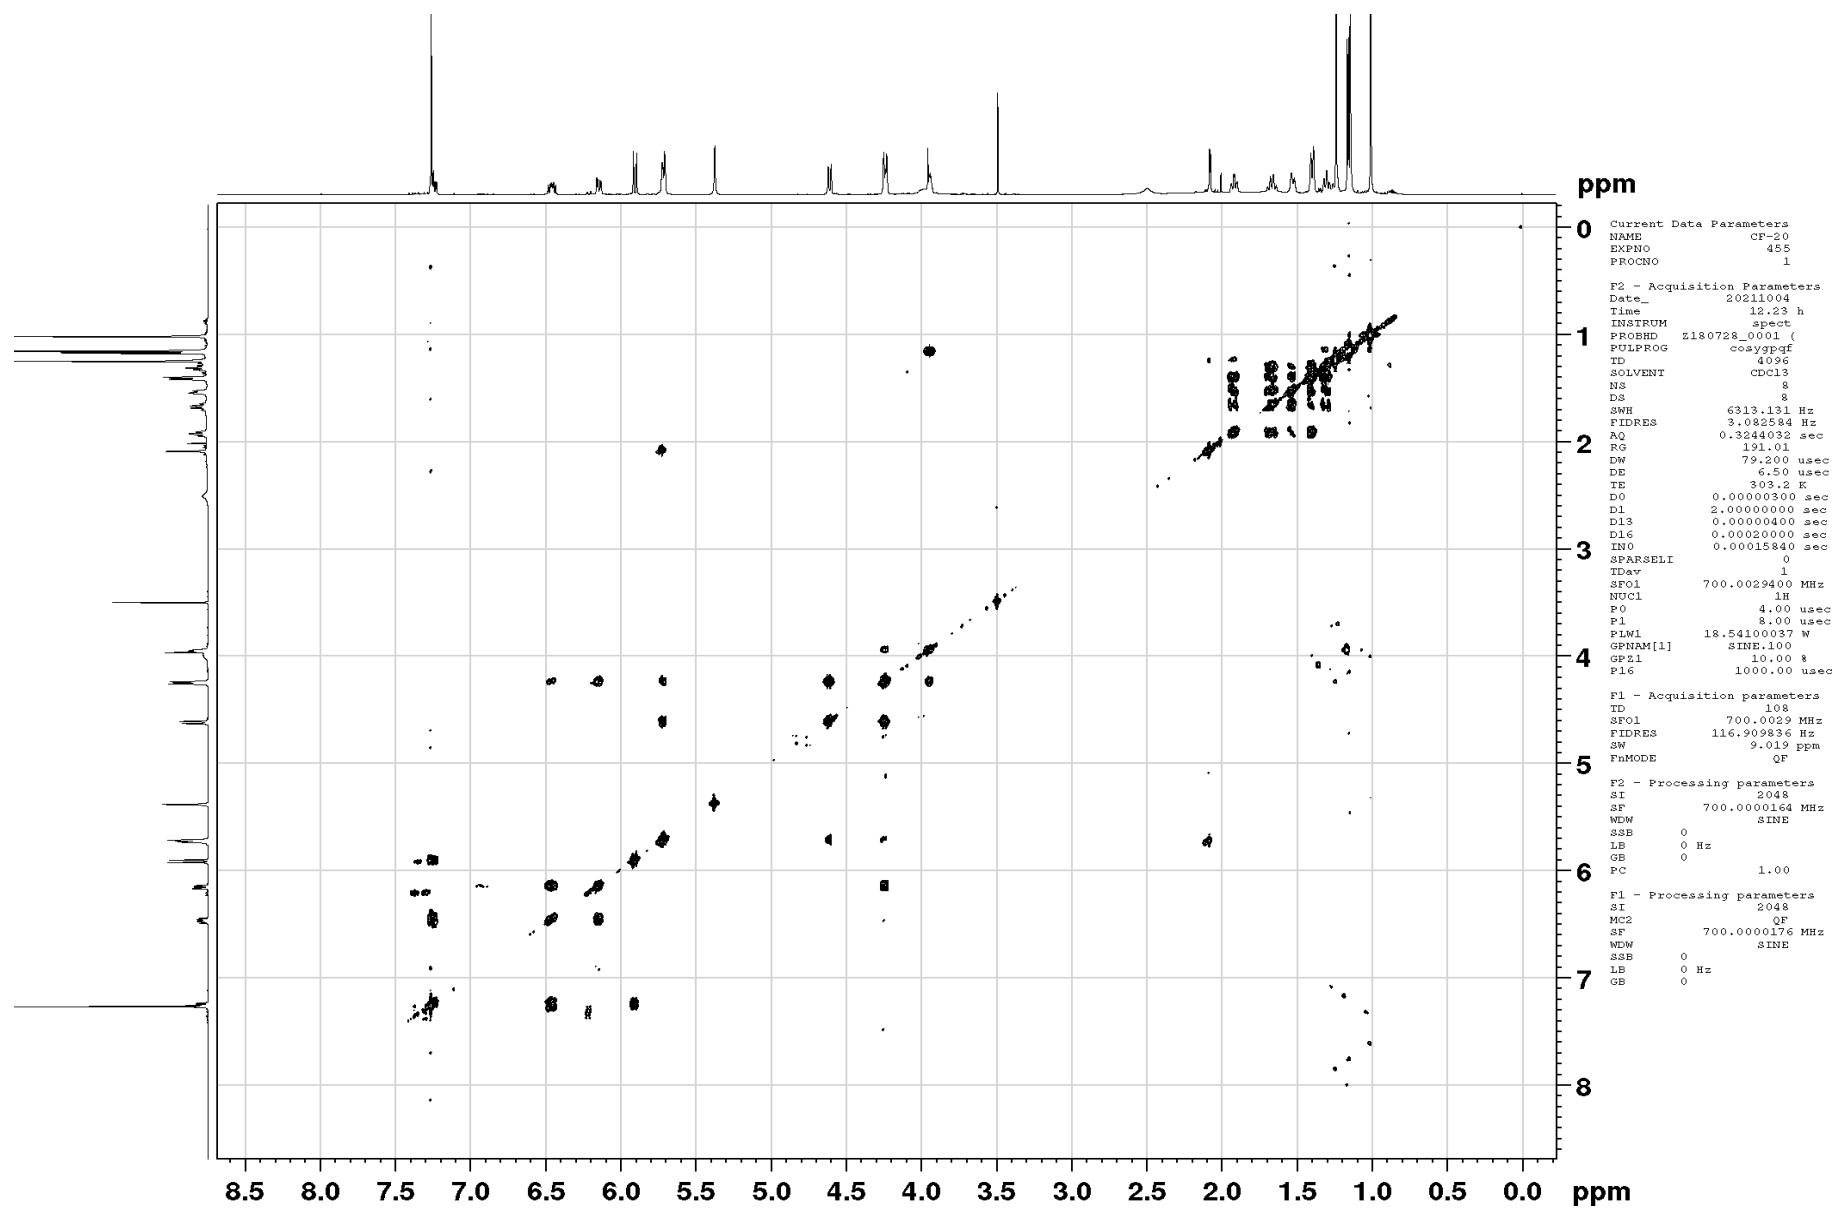

Figure S38. COSY-45 spectrum (700 MHz, CDCl<sub>3</sub>) of **4**

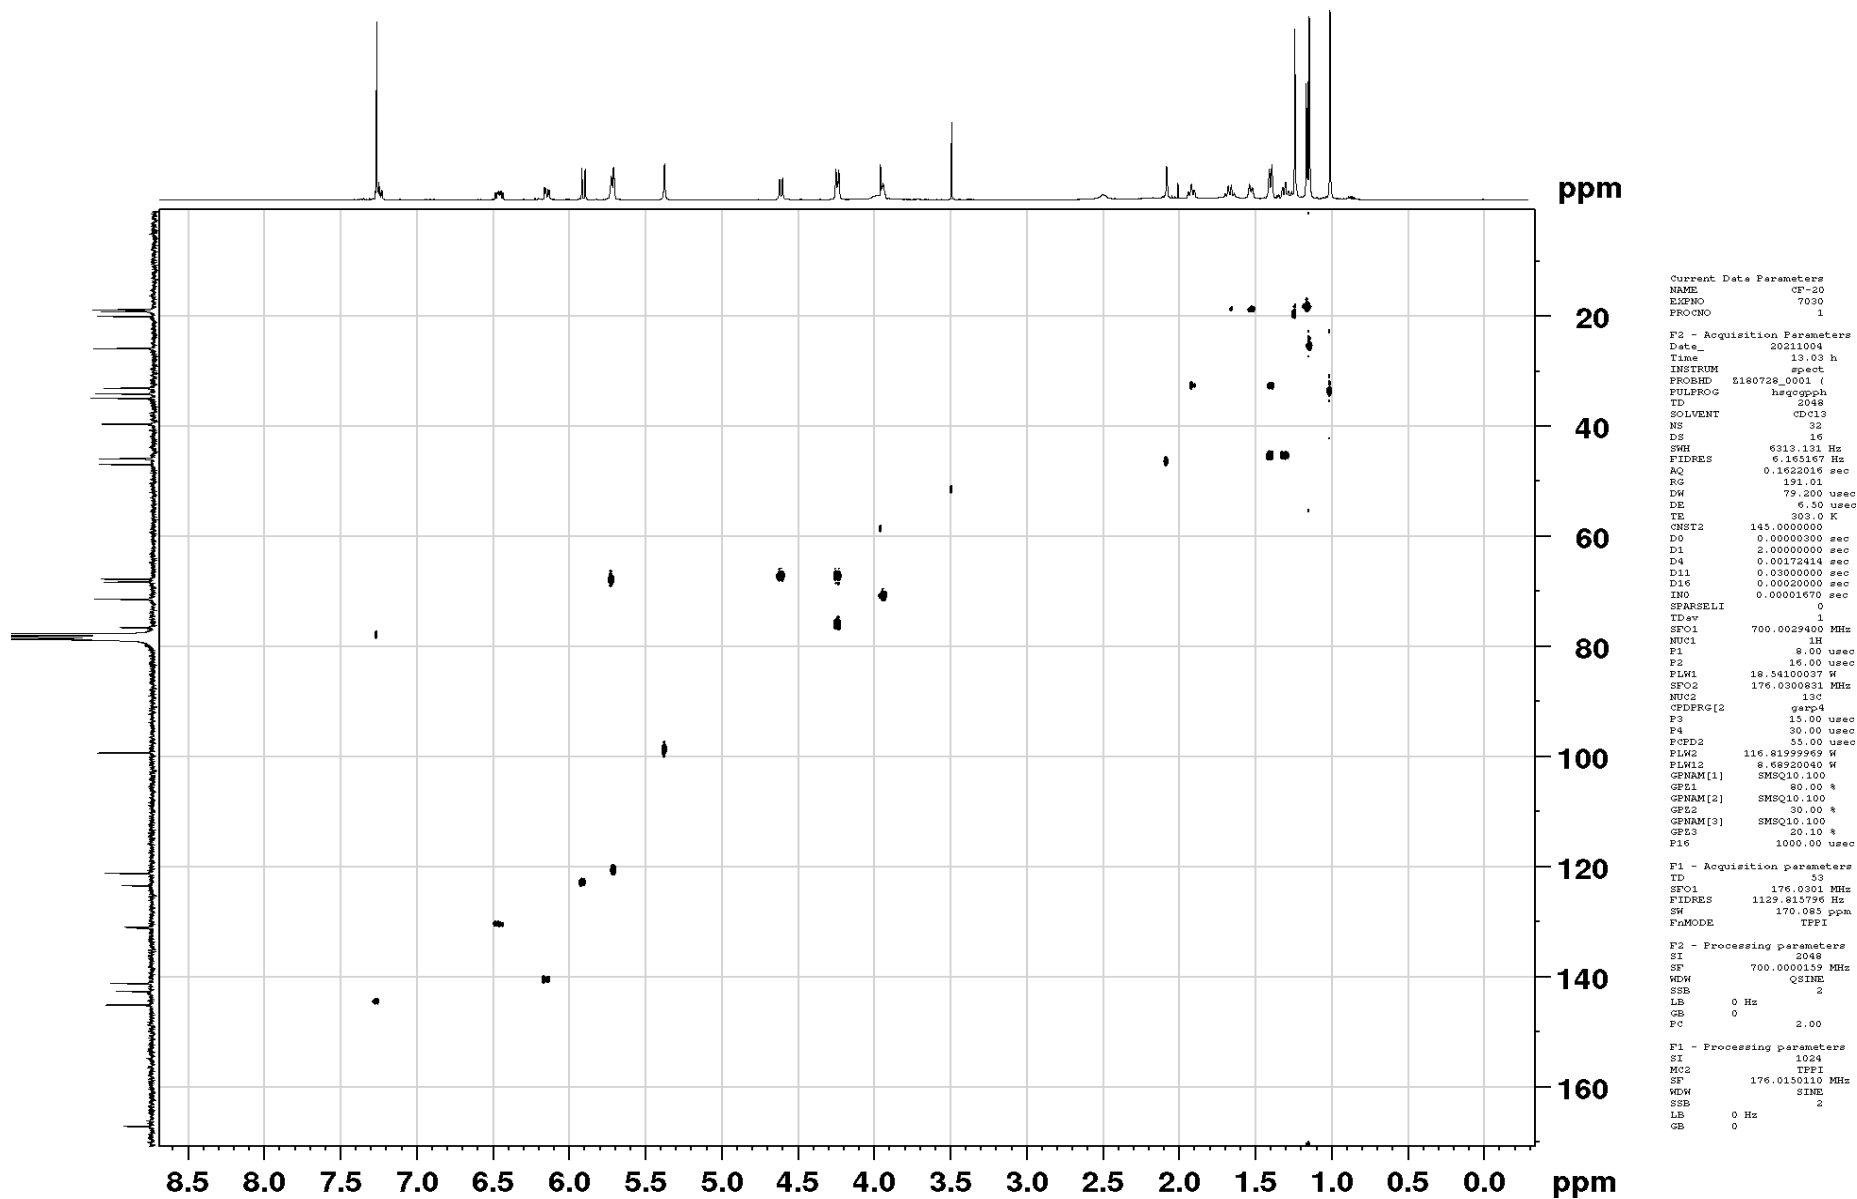

Figure S39. HSQC spectrum (700 MHz,  $\text{CDCl}_3$ ) of **4**

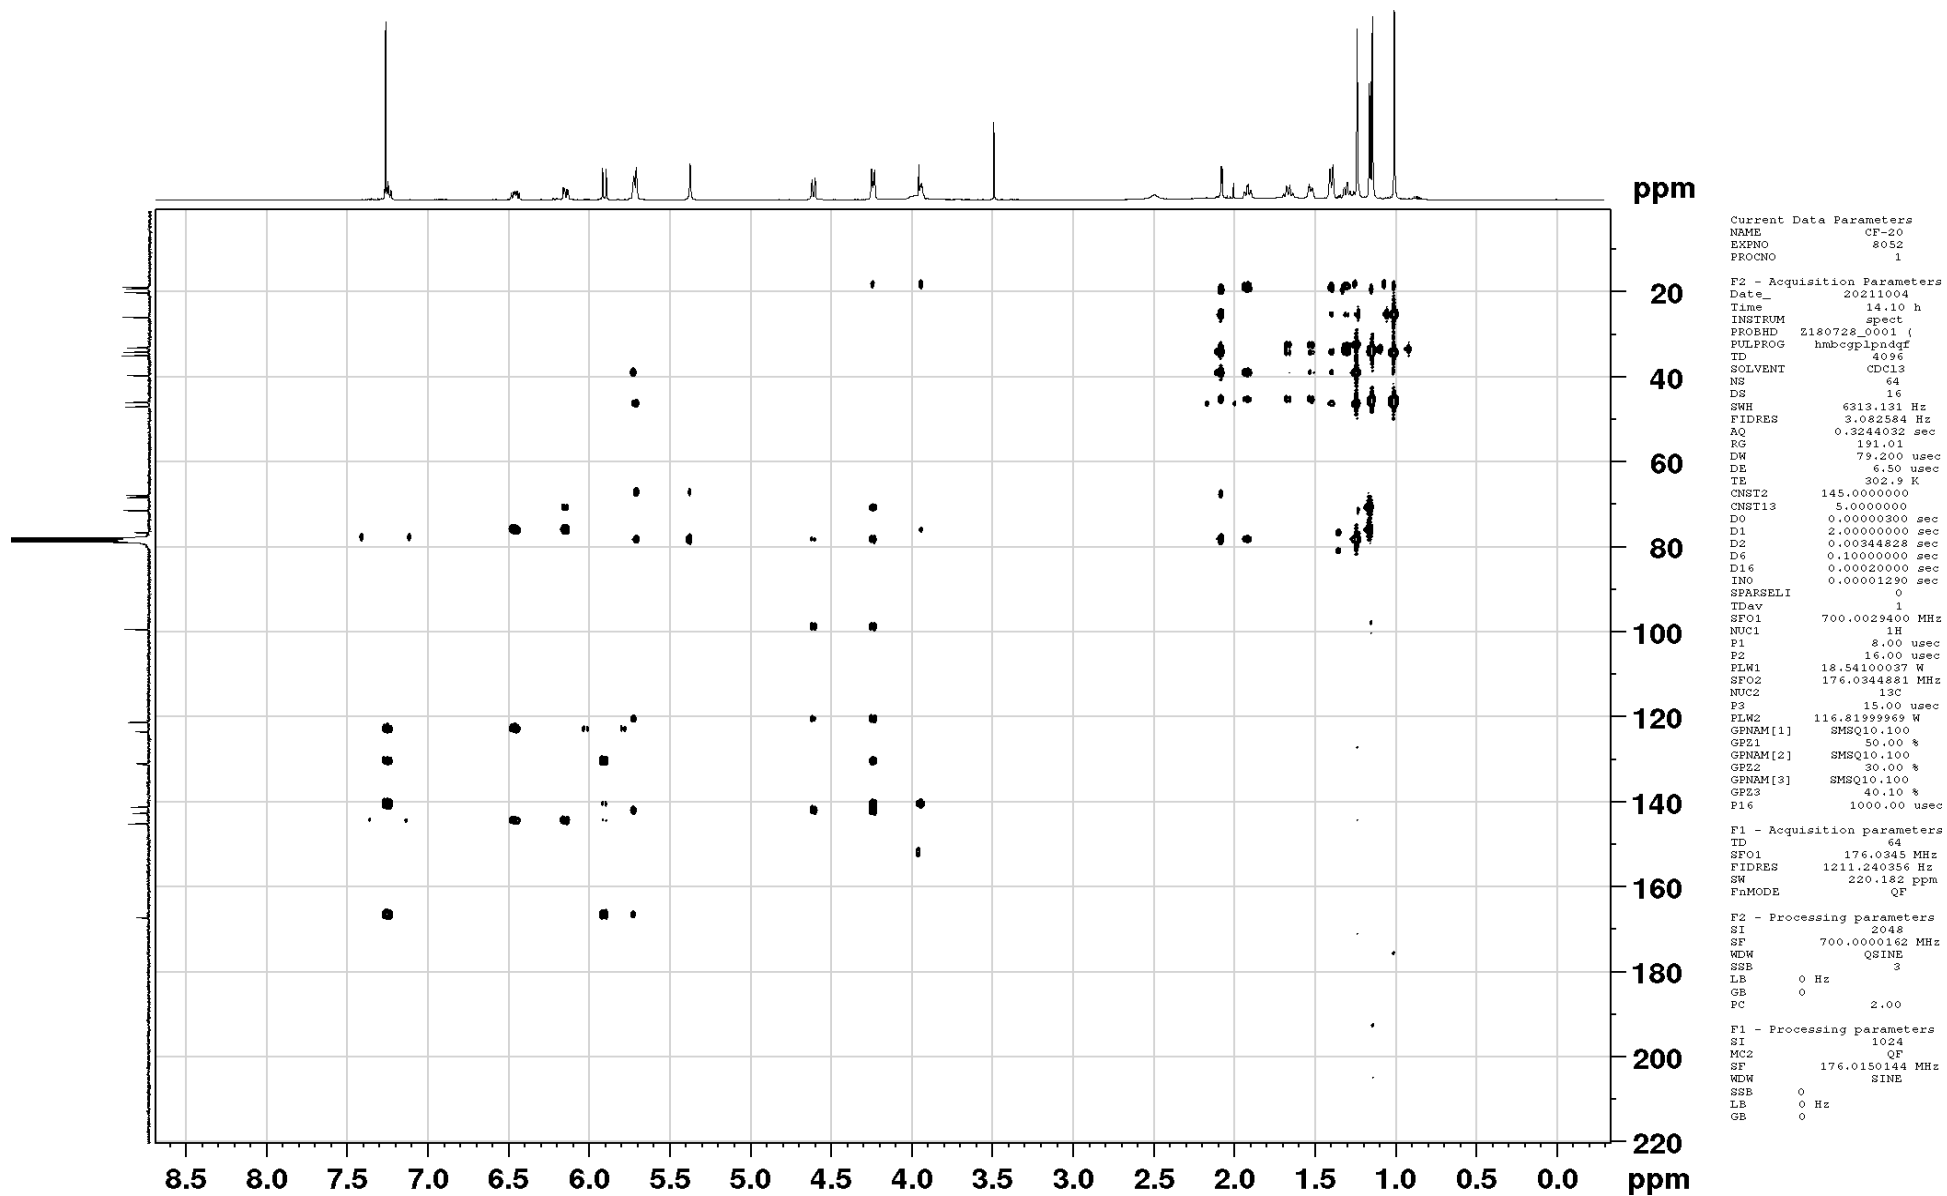

Figure S40. HMBC spectrum (700 MHz,  $\text{CDCl}_3$ ) of **4**

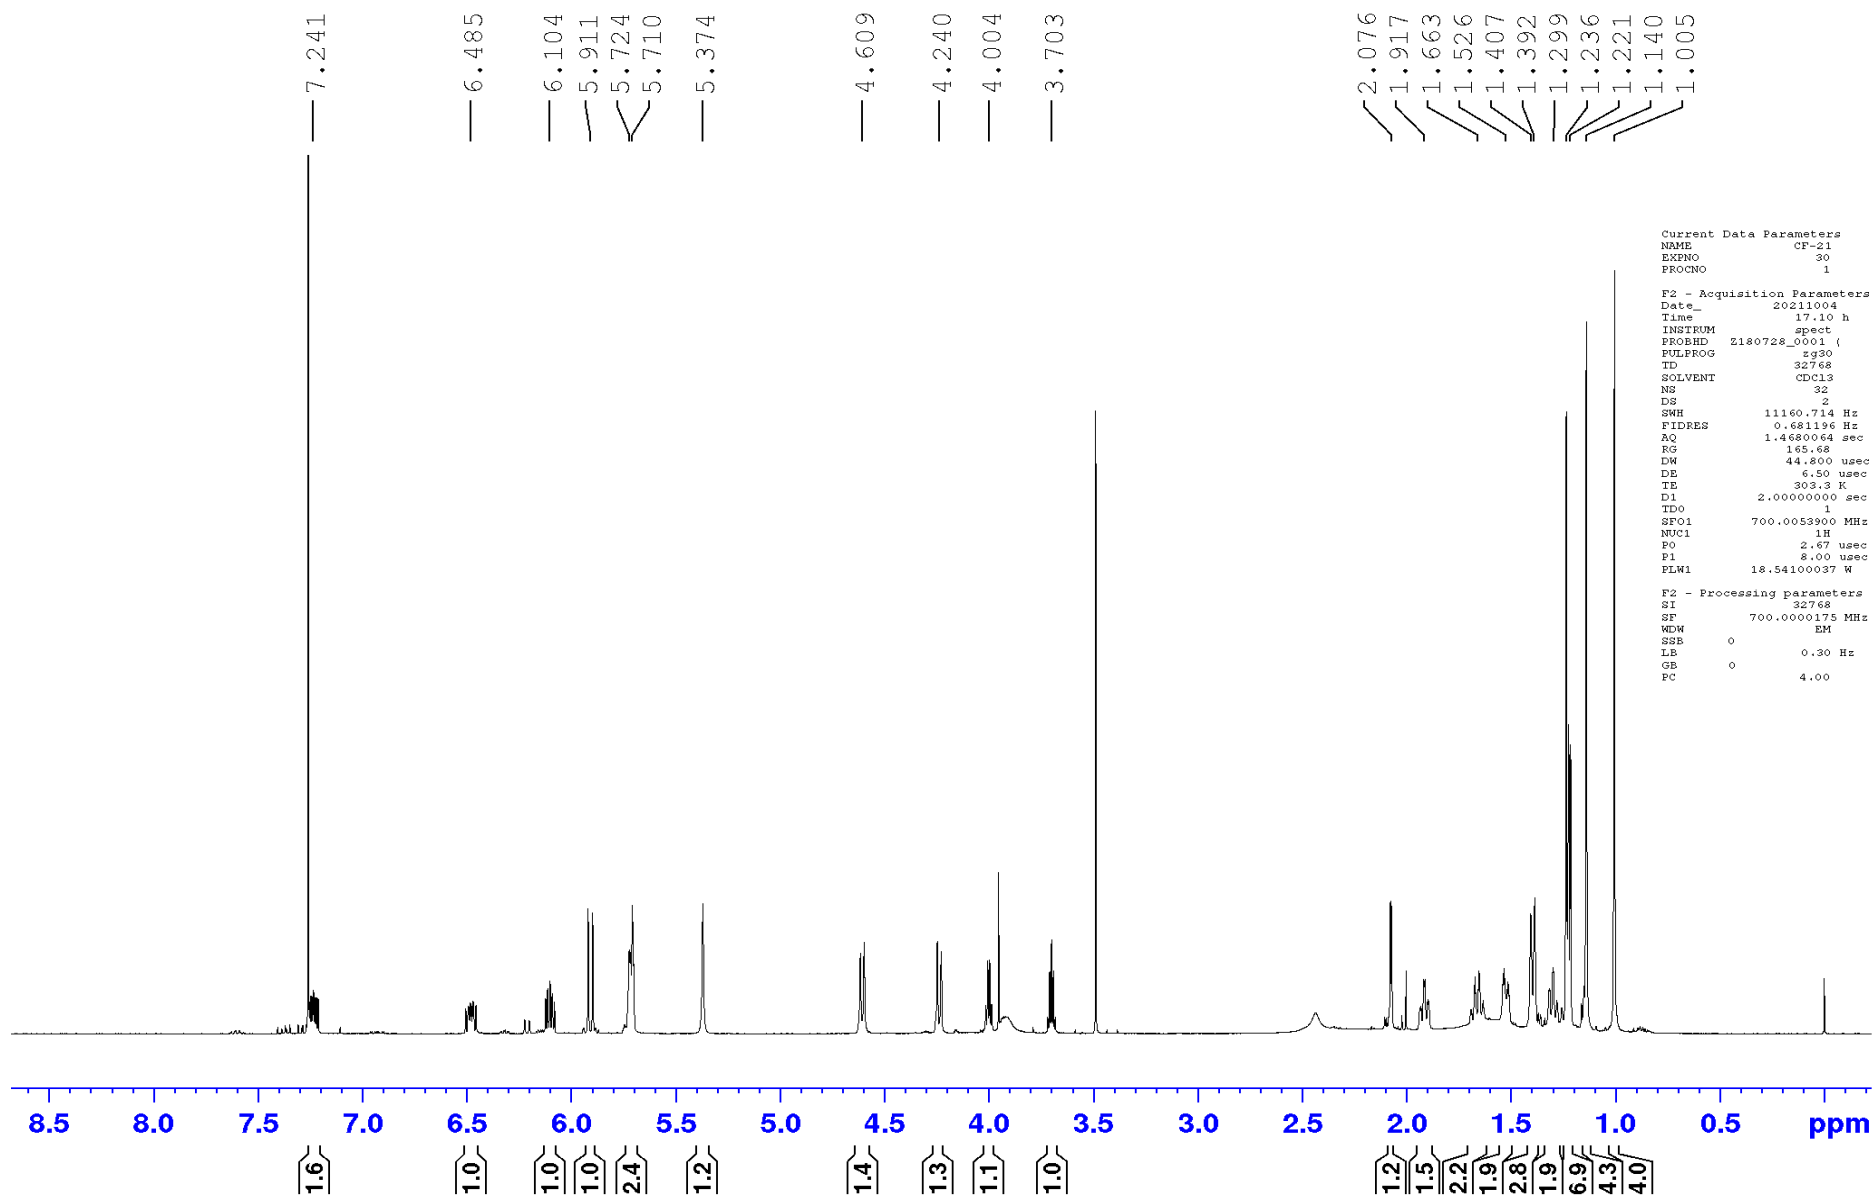

Figure S41.  $^1\text{H}$  NMR spectrum (700 MHz,  $\text{CDCl}_3$ ) of **5**

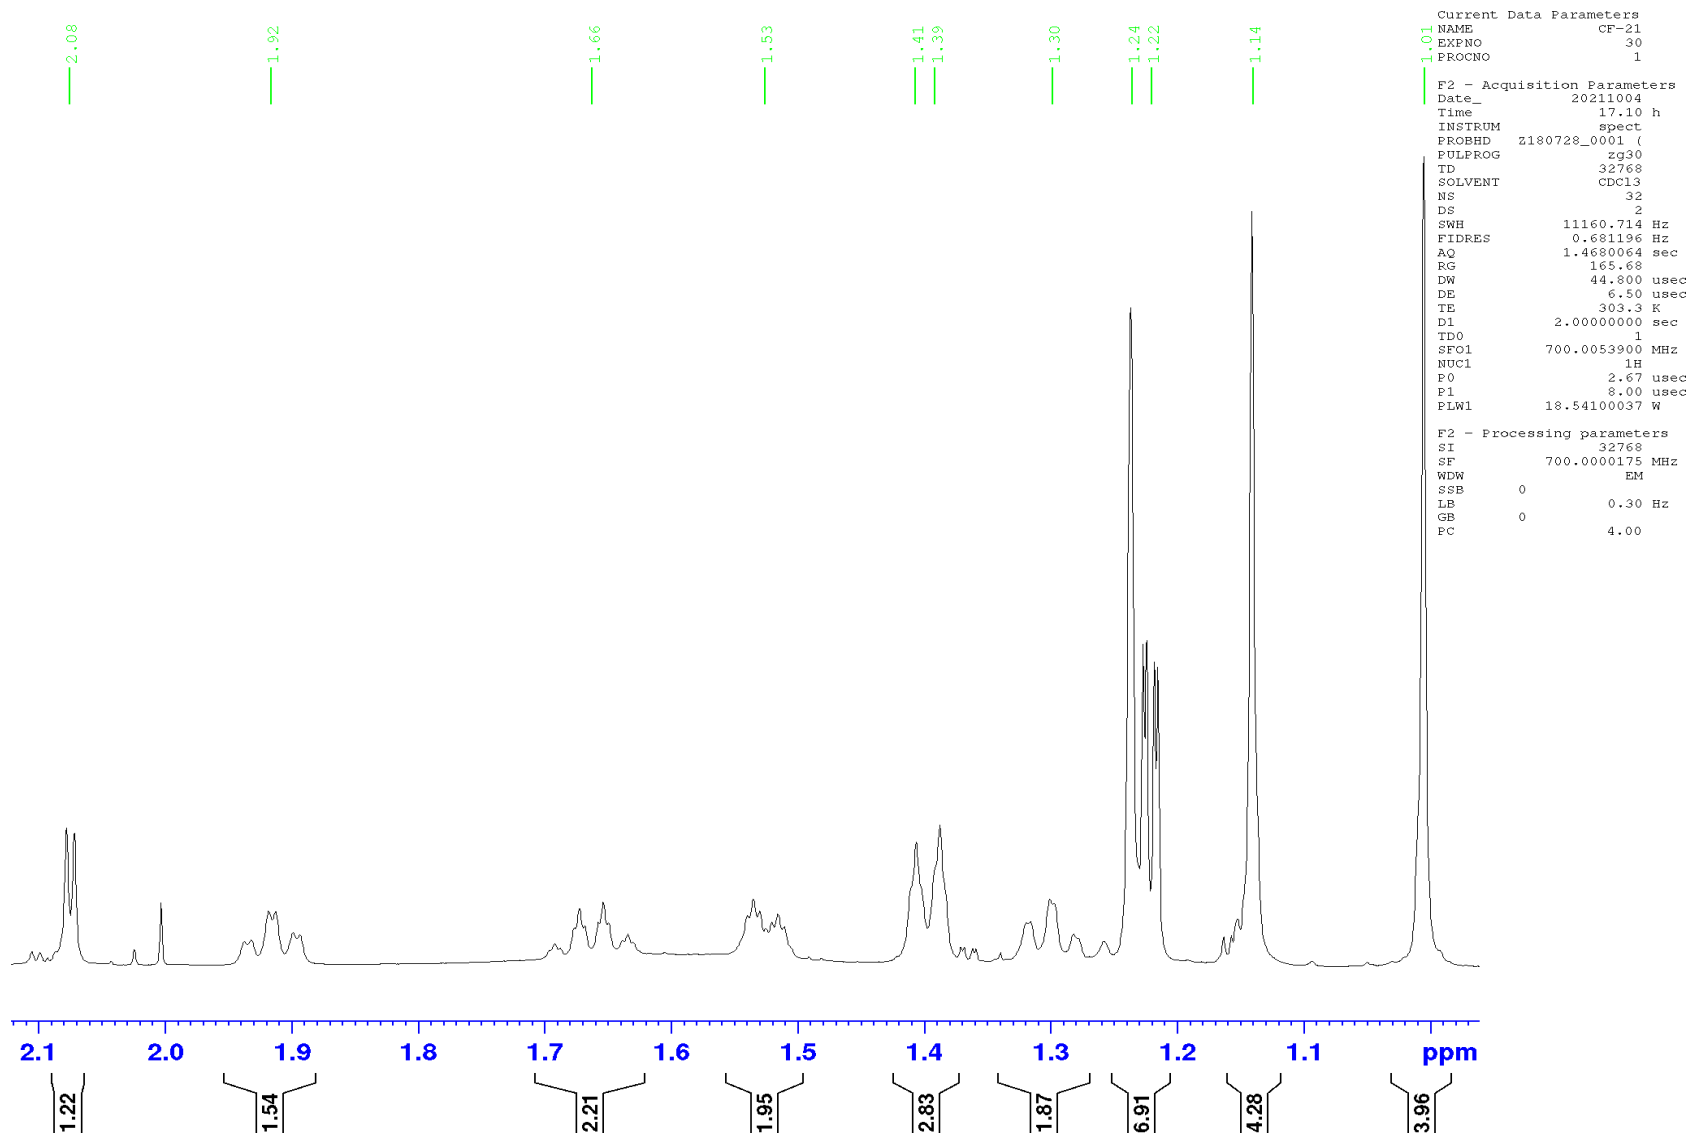

$^1\text{H}$  NMR spectrum (700 MHz,  $\text{CDCl}_3$ ) of **5** (expanded)

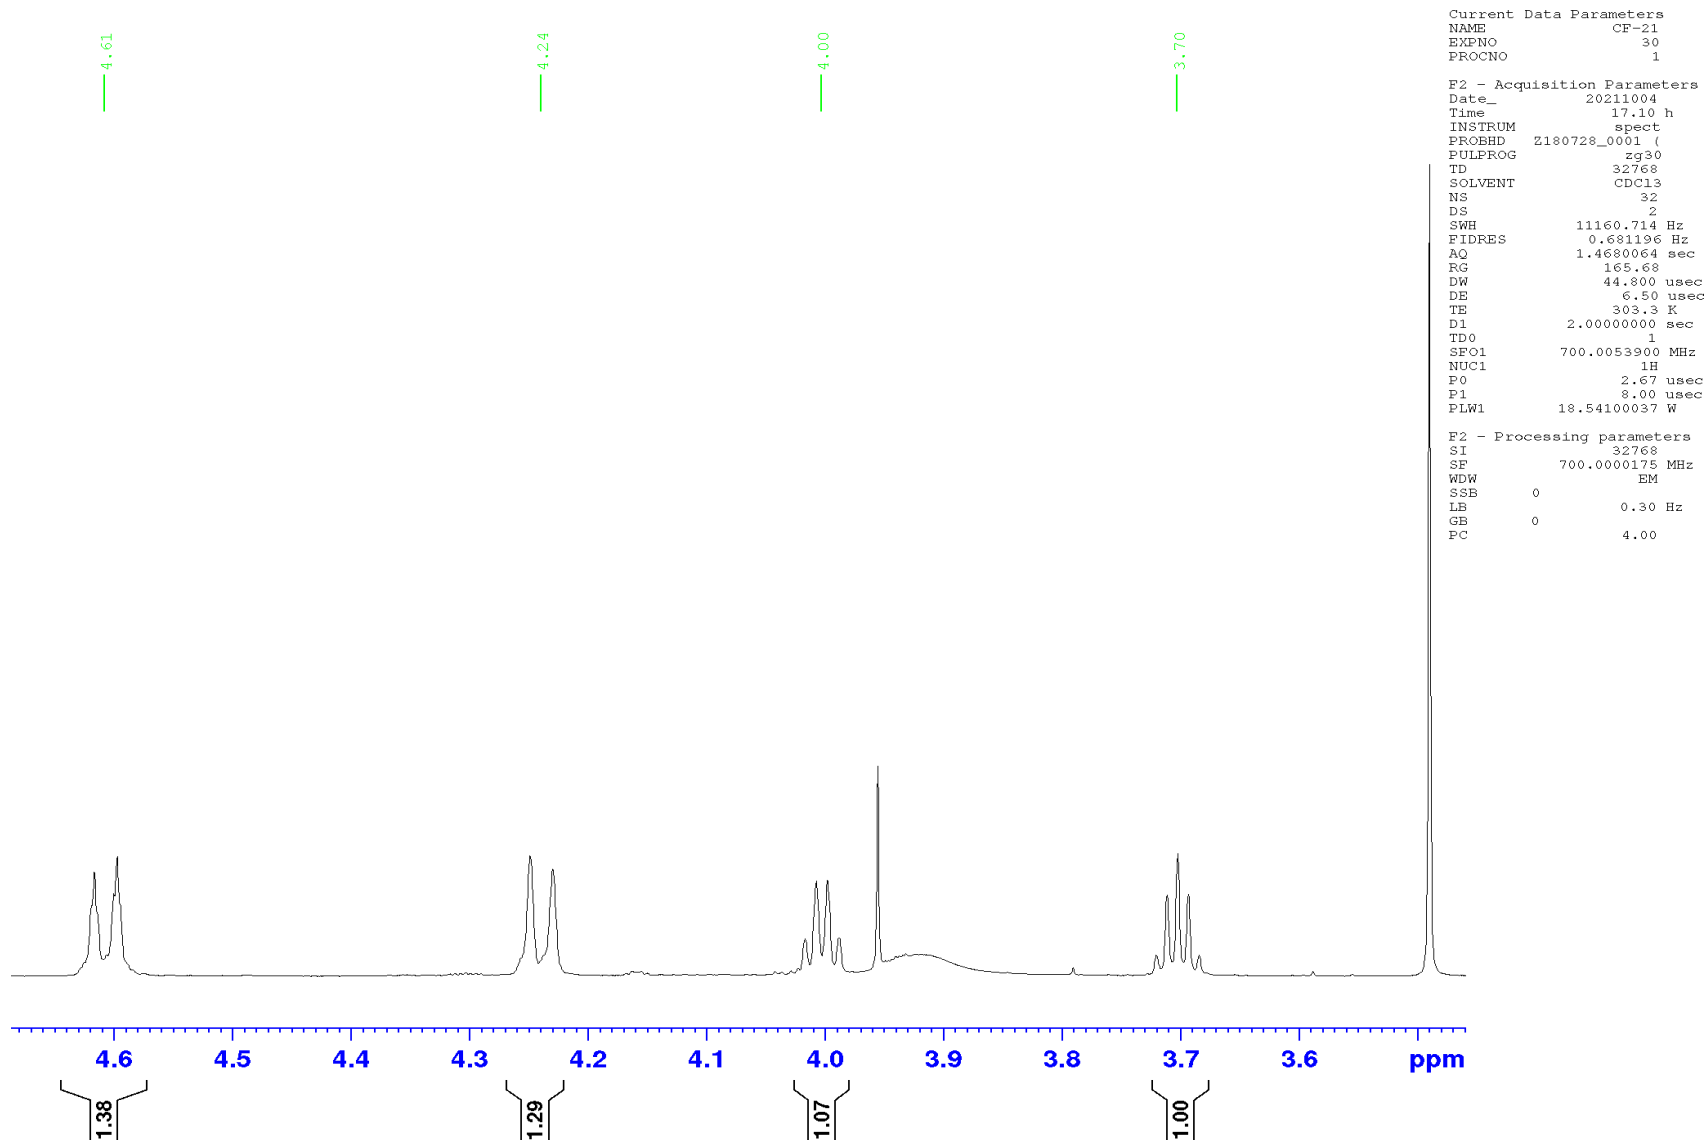

$^1\text{H}$  NMR spectrum (700 MHz,  $\text{CDCl}_3$ ) of **5** (expanded)

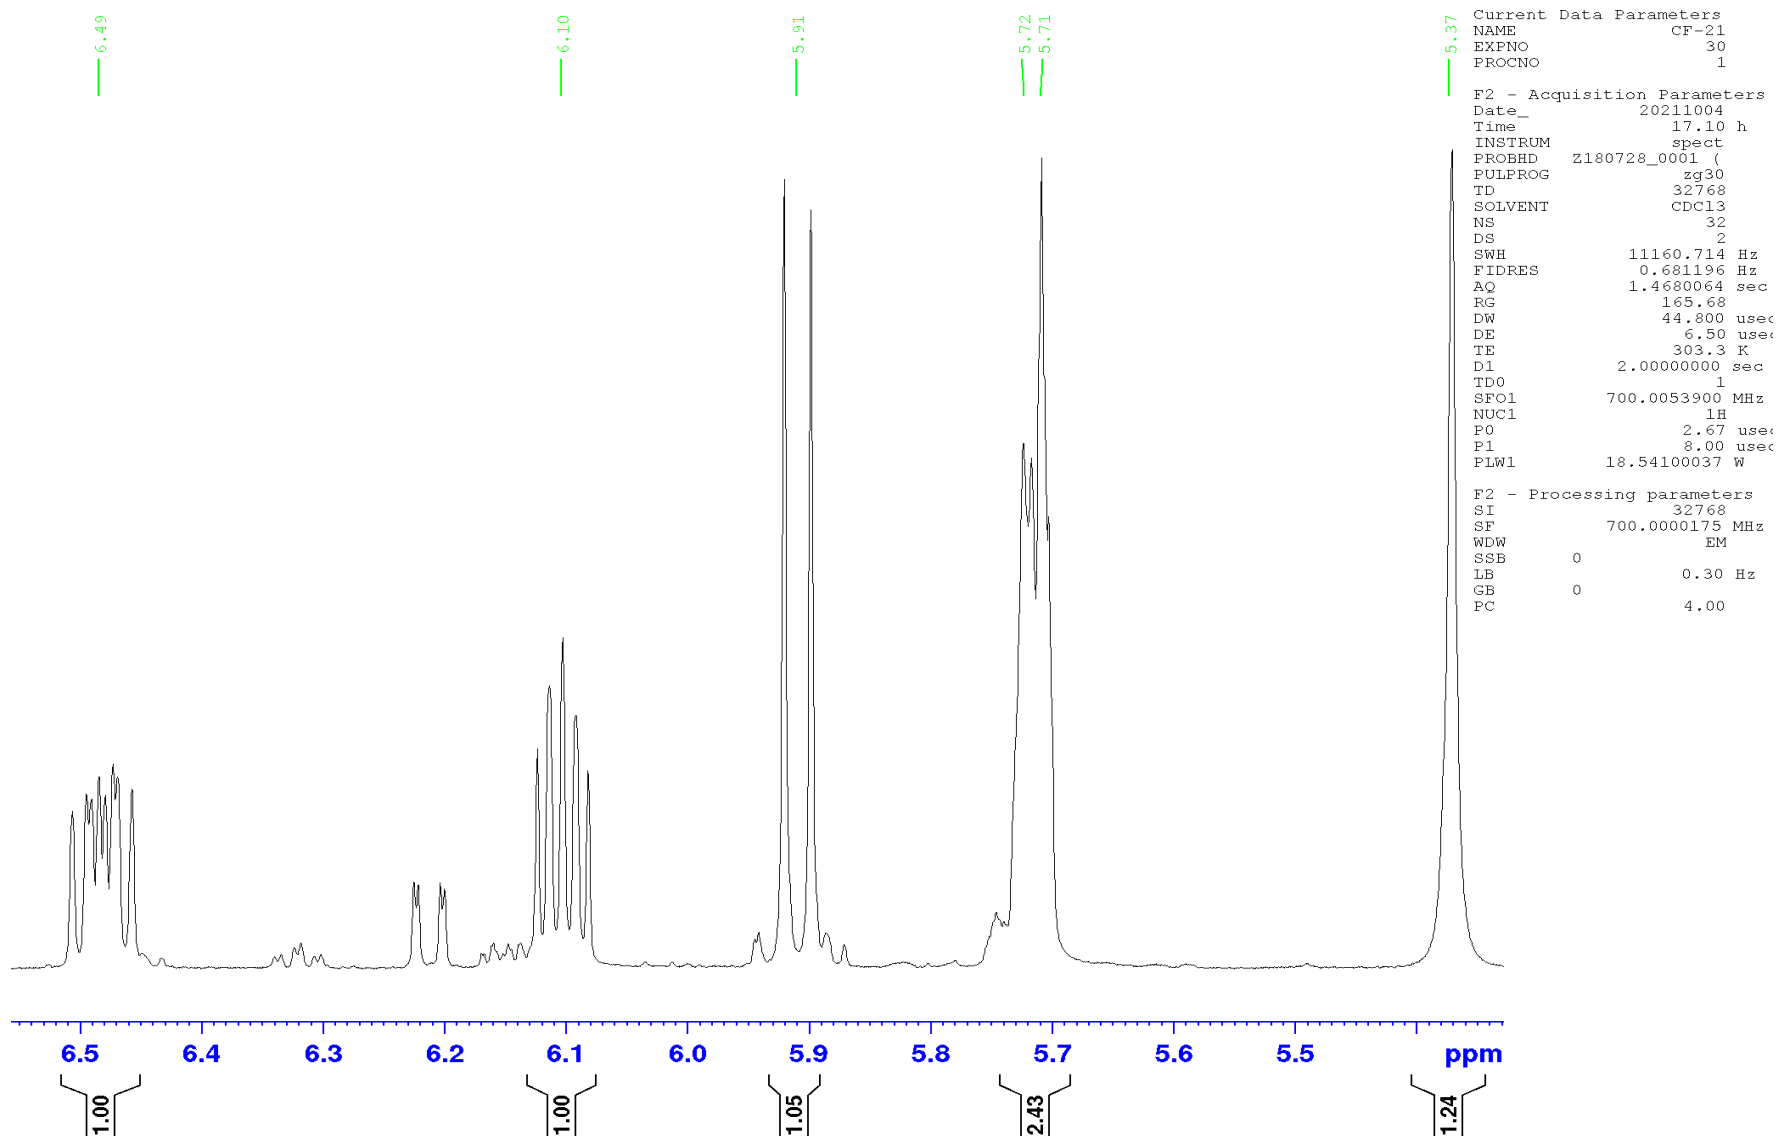

$^1\text{H}$  NMR spectrum (700 MHz,  $\text{CDCl}_3$ ) of **5** (expanded)

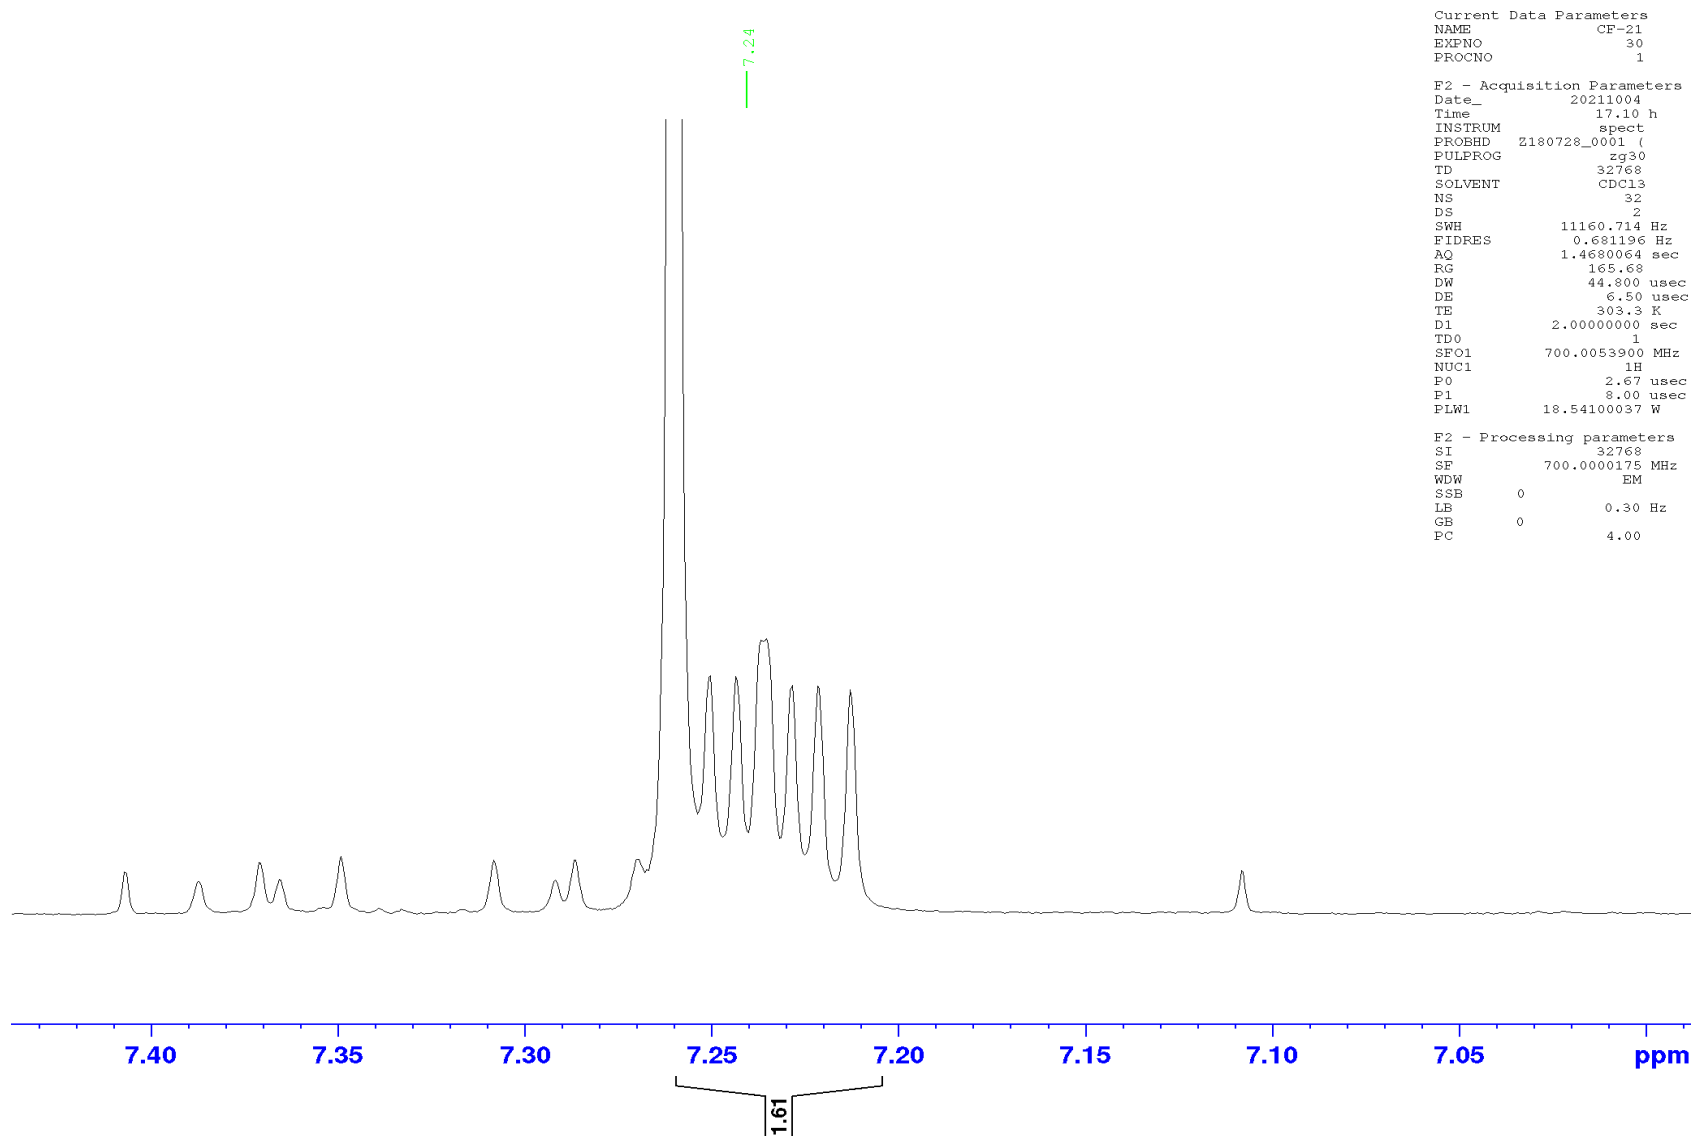

$^1\text{H}$  NMR spectrum (700 MHz,  $\text{CDCl}_3$ ) of **5** (expanded)

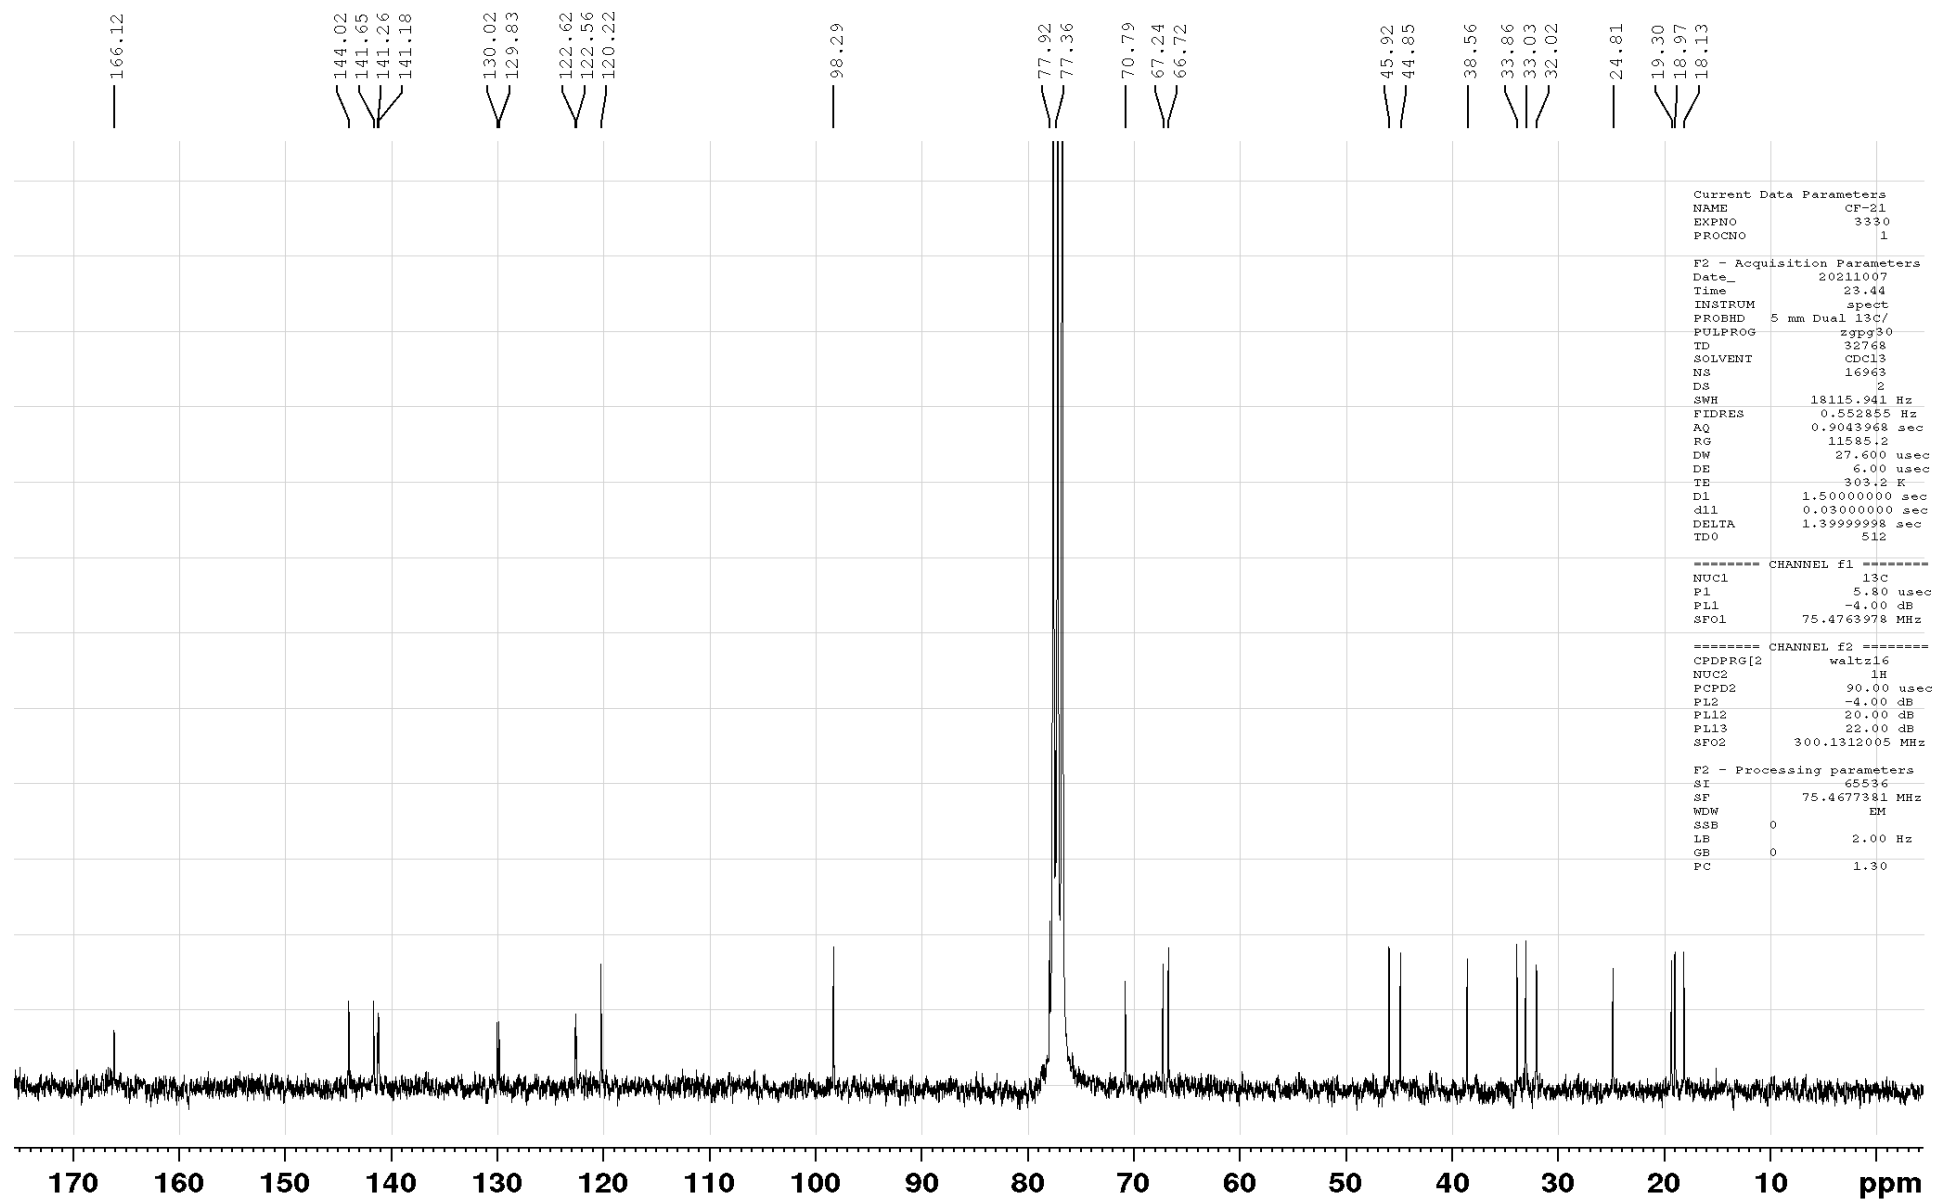

Figure S42.  $^{13}\text{C}$  NMR spectrum (75 MHz,  $\text{CDCl}_3$ ) of **5**

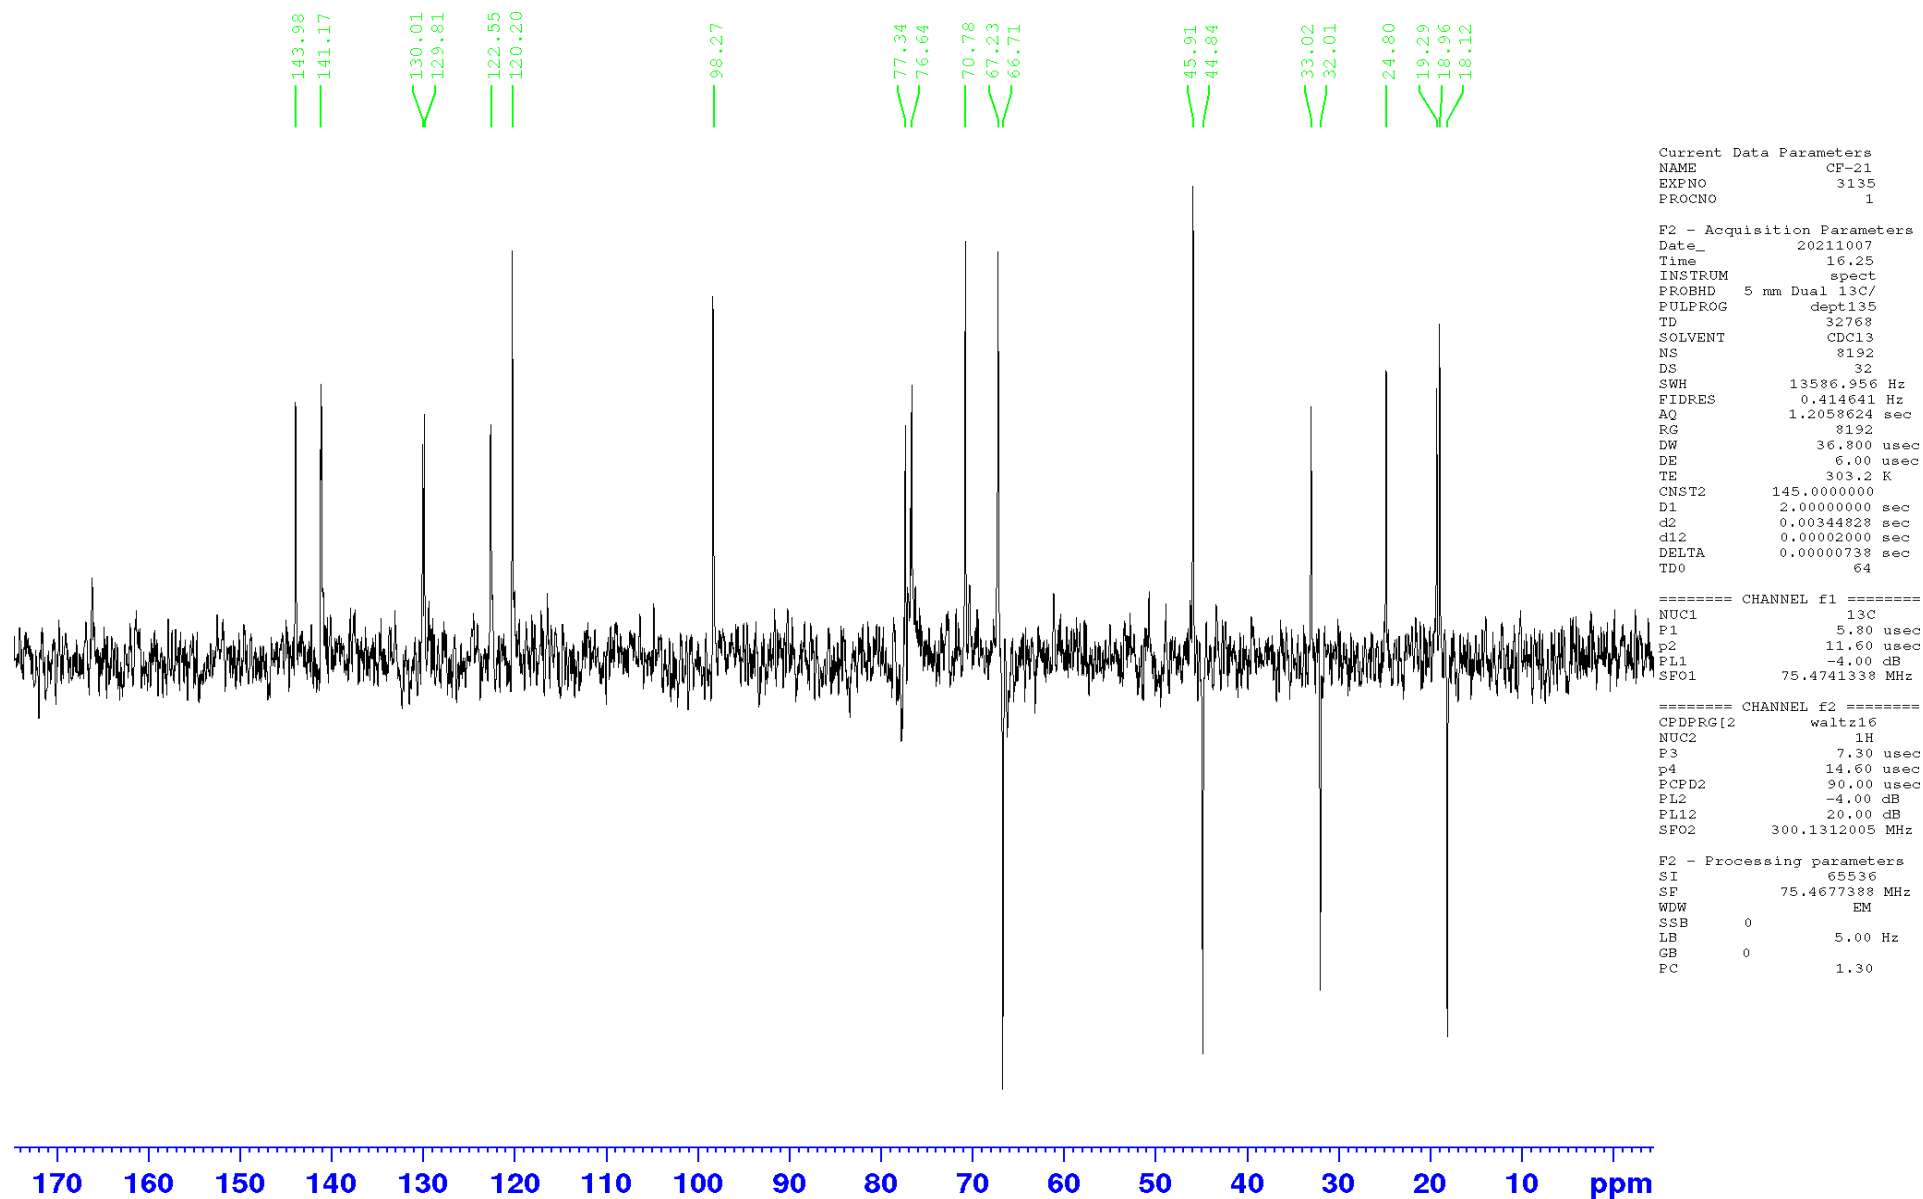

Figure S43. DEPT-135 NMR spectrum (75 MHz, CDCl<sub>3</sub>) of **5**

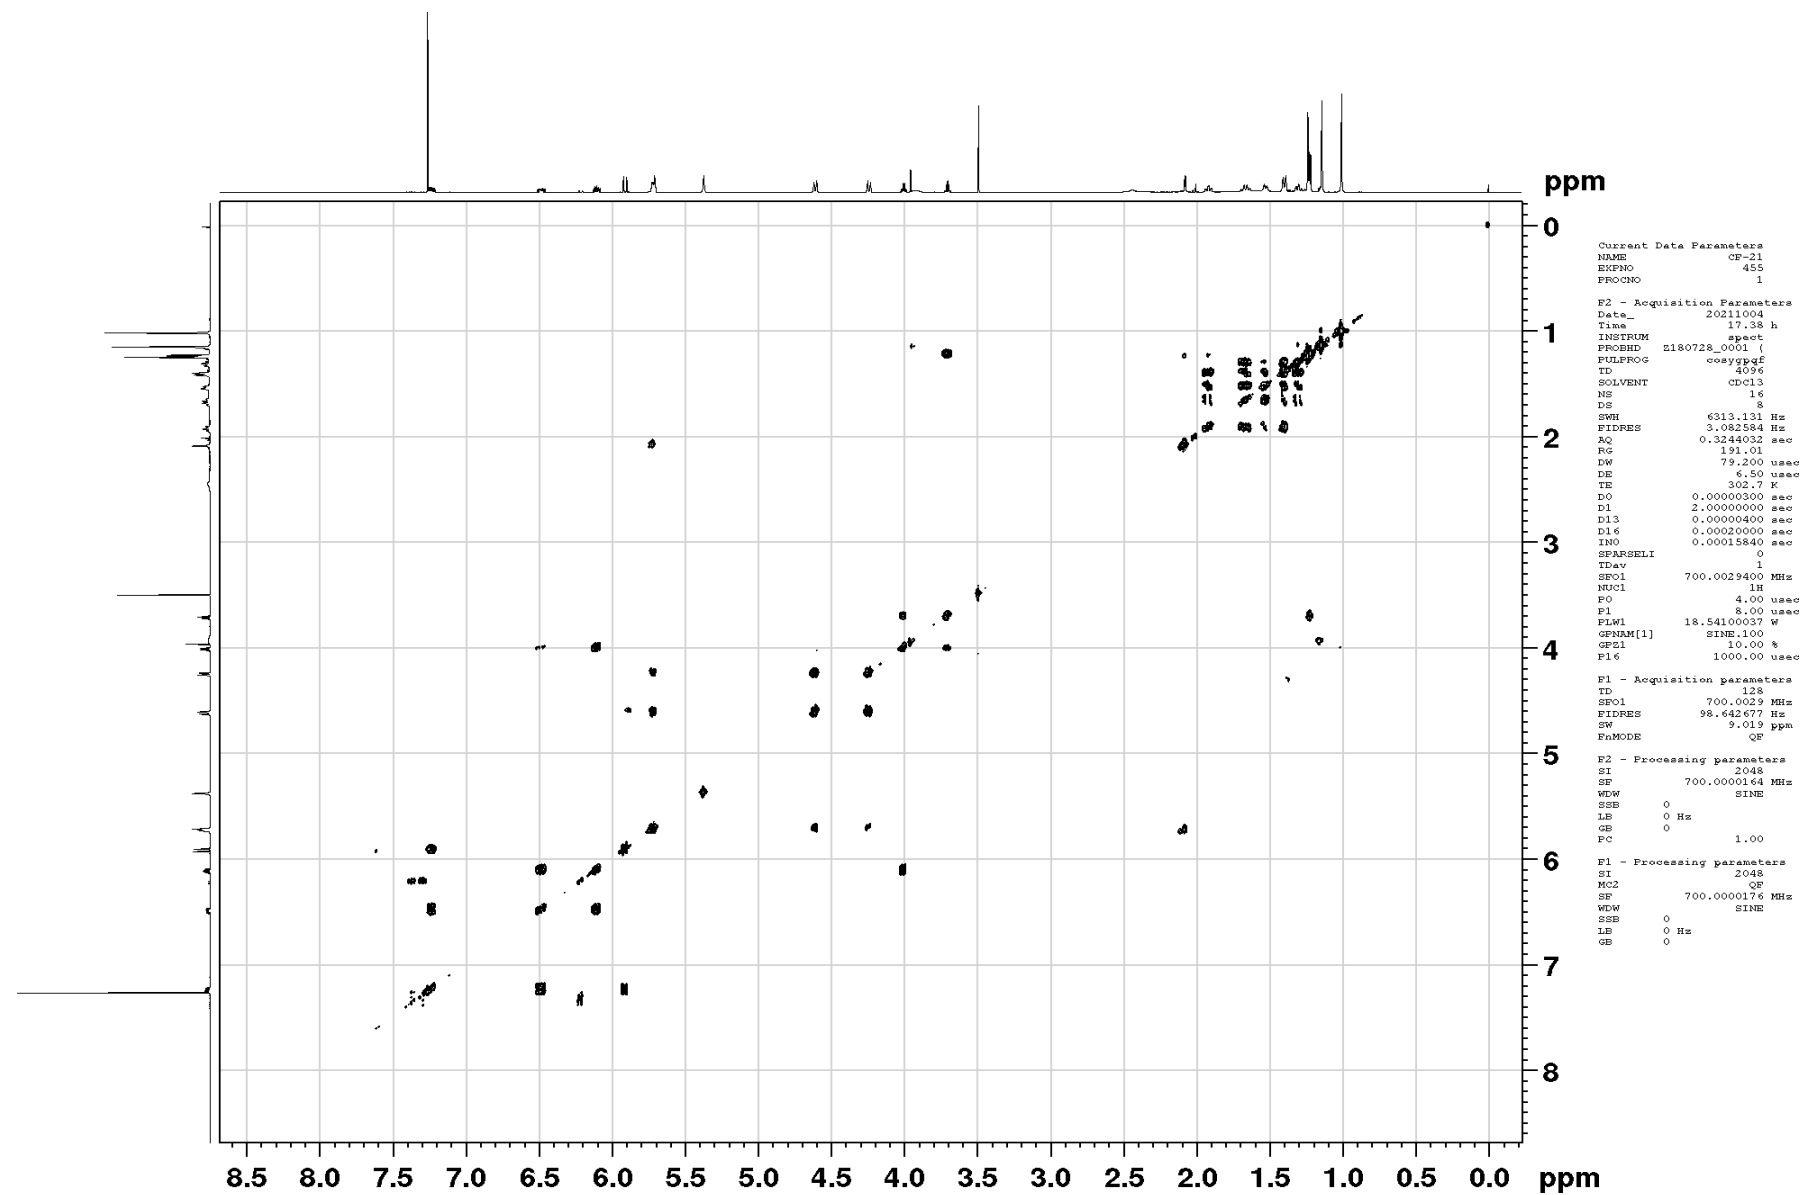

Figure S44. COSY-45 spectrum (700 MHz, CDCl<sub>3</sub>) of 5

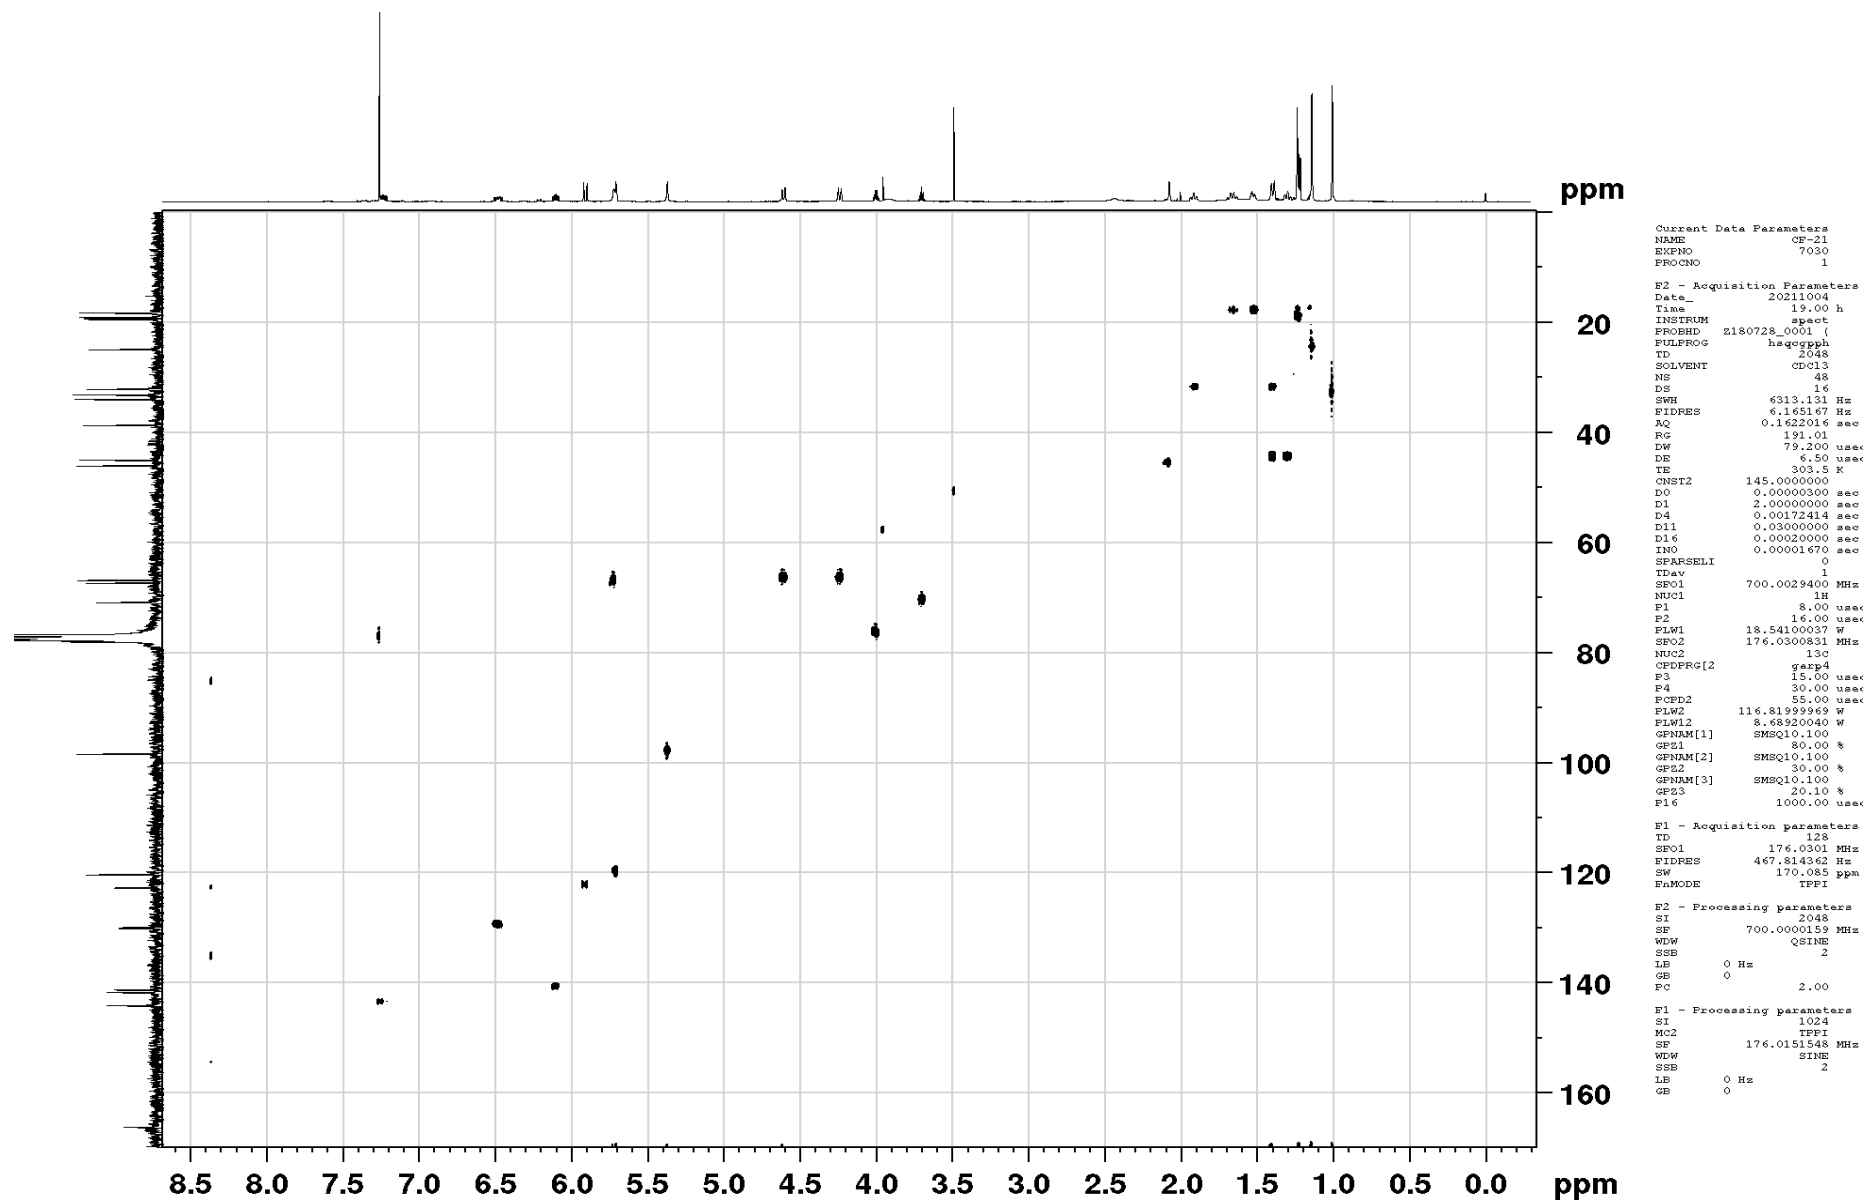

Figure S45. HSQC spectrum (700 MHz, CDCl<sub>3</sub>) of **5**

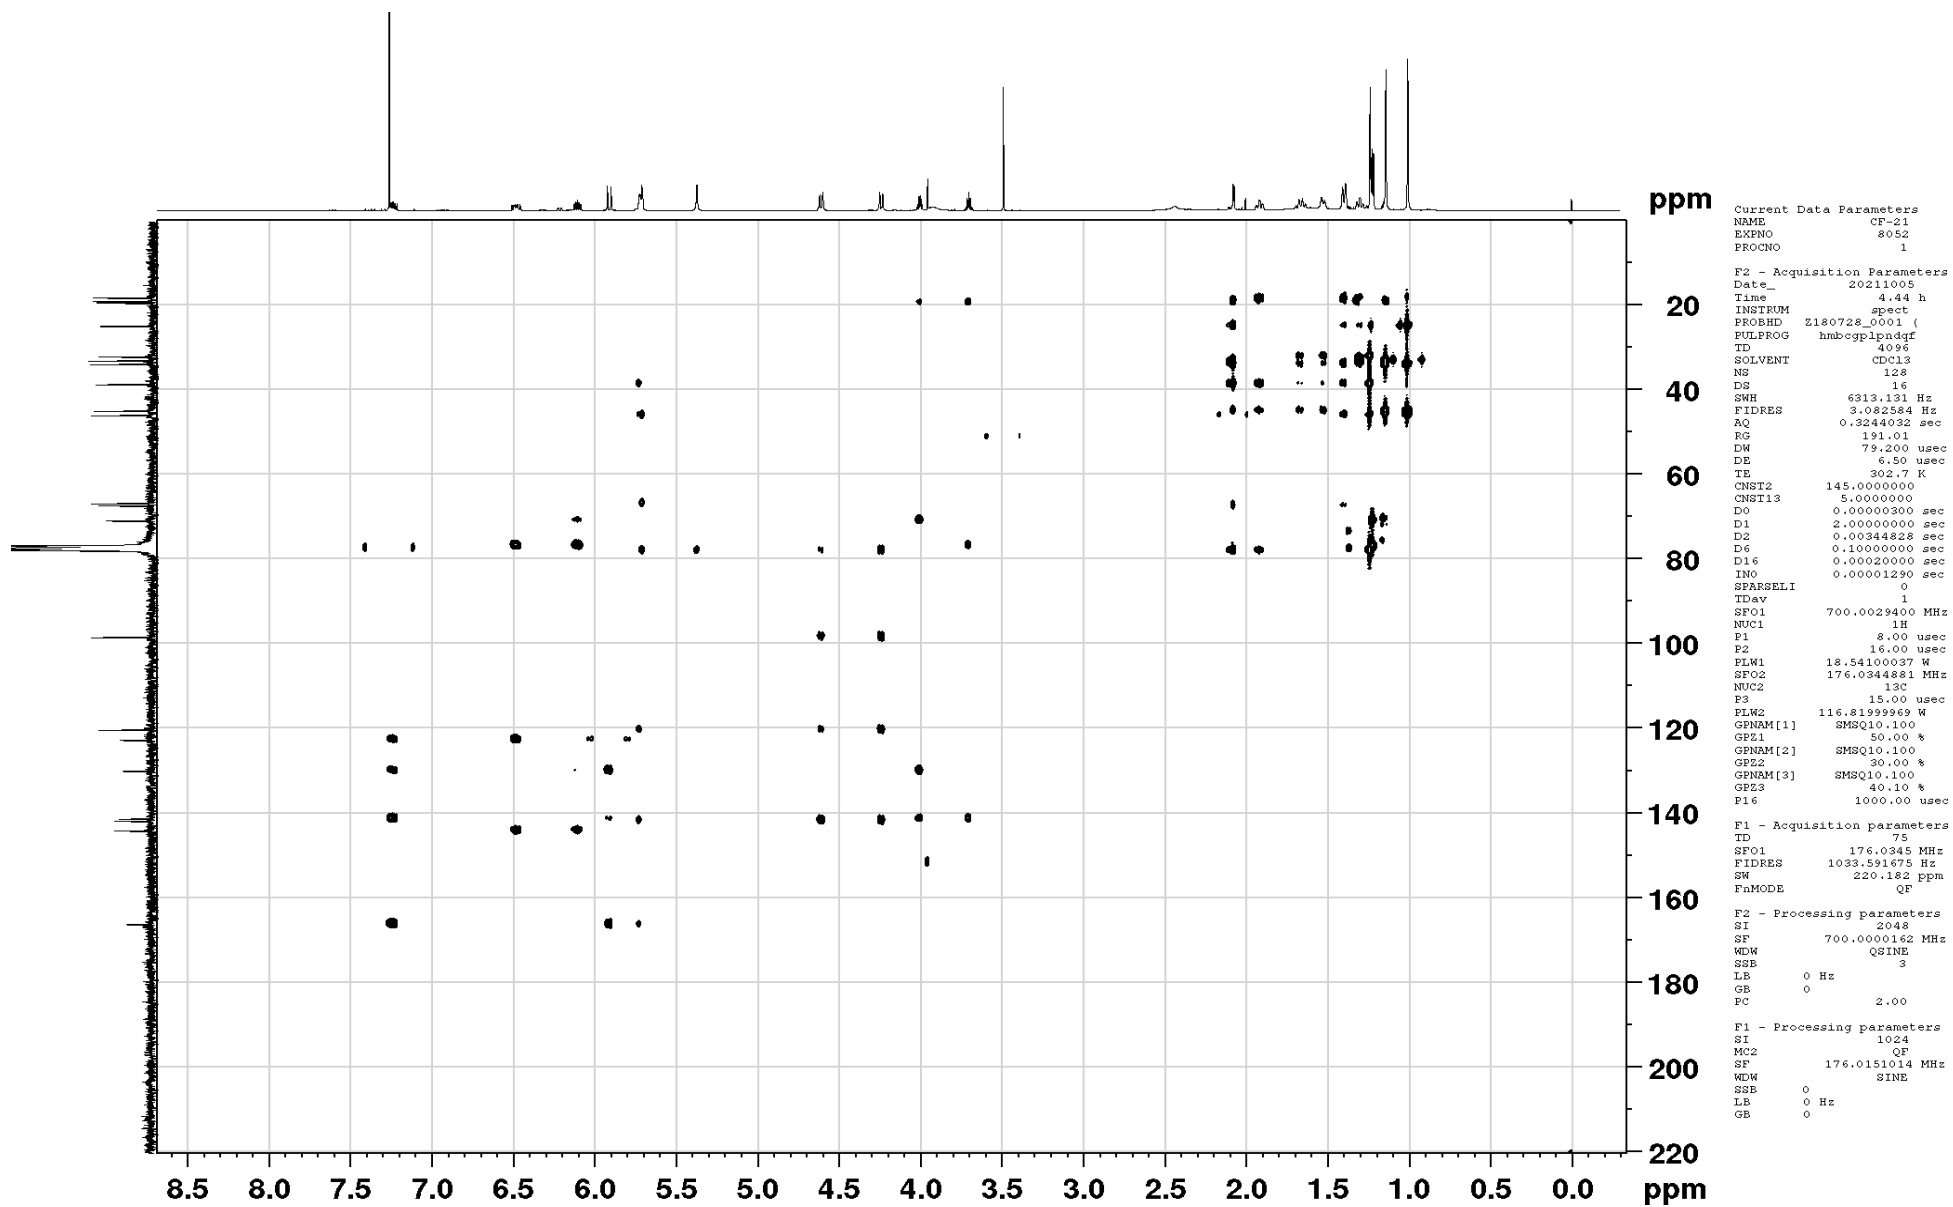

Figure S46. HMBC spectrum (700 MHz, CDCl<sub>3</sub>) of **5**

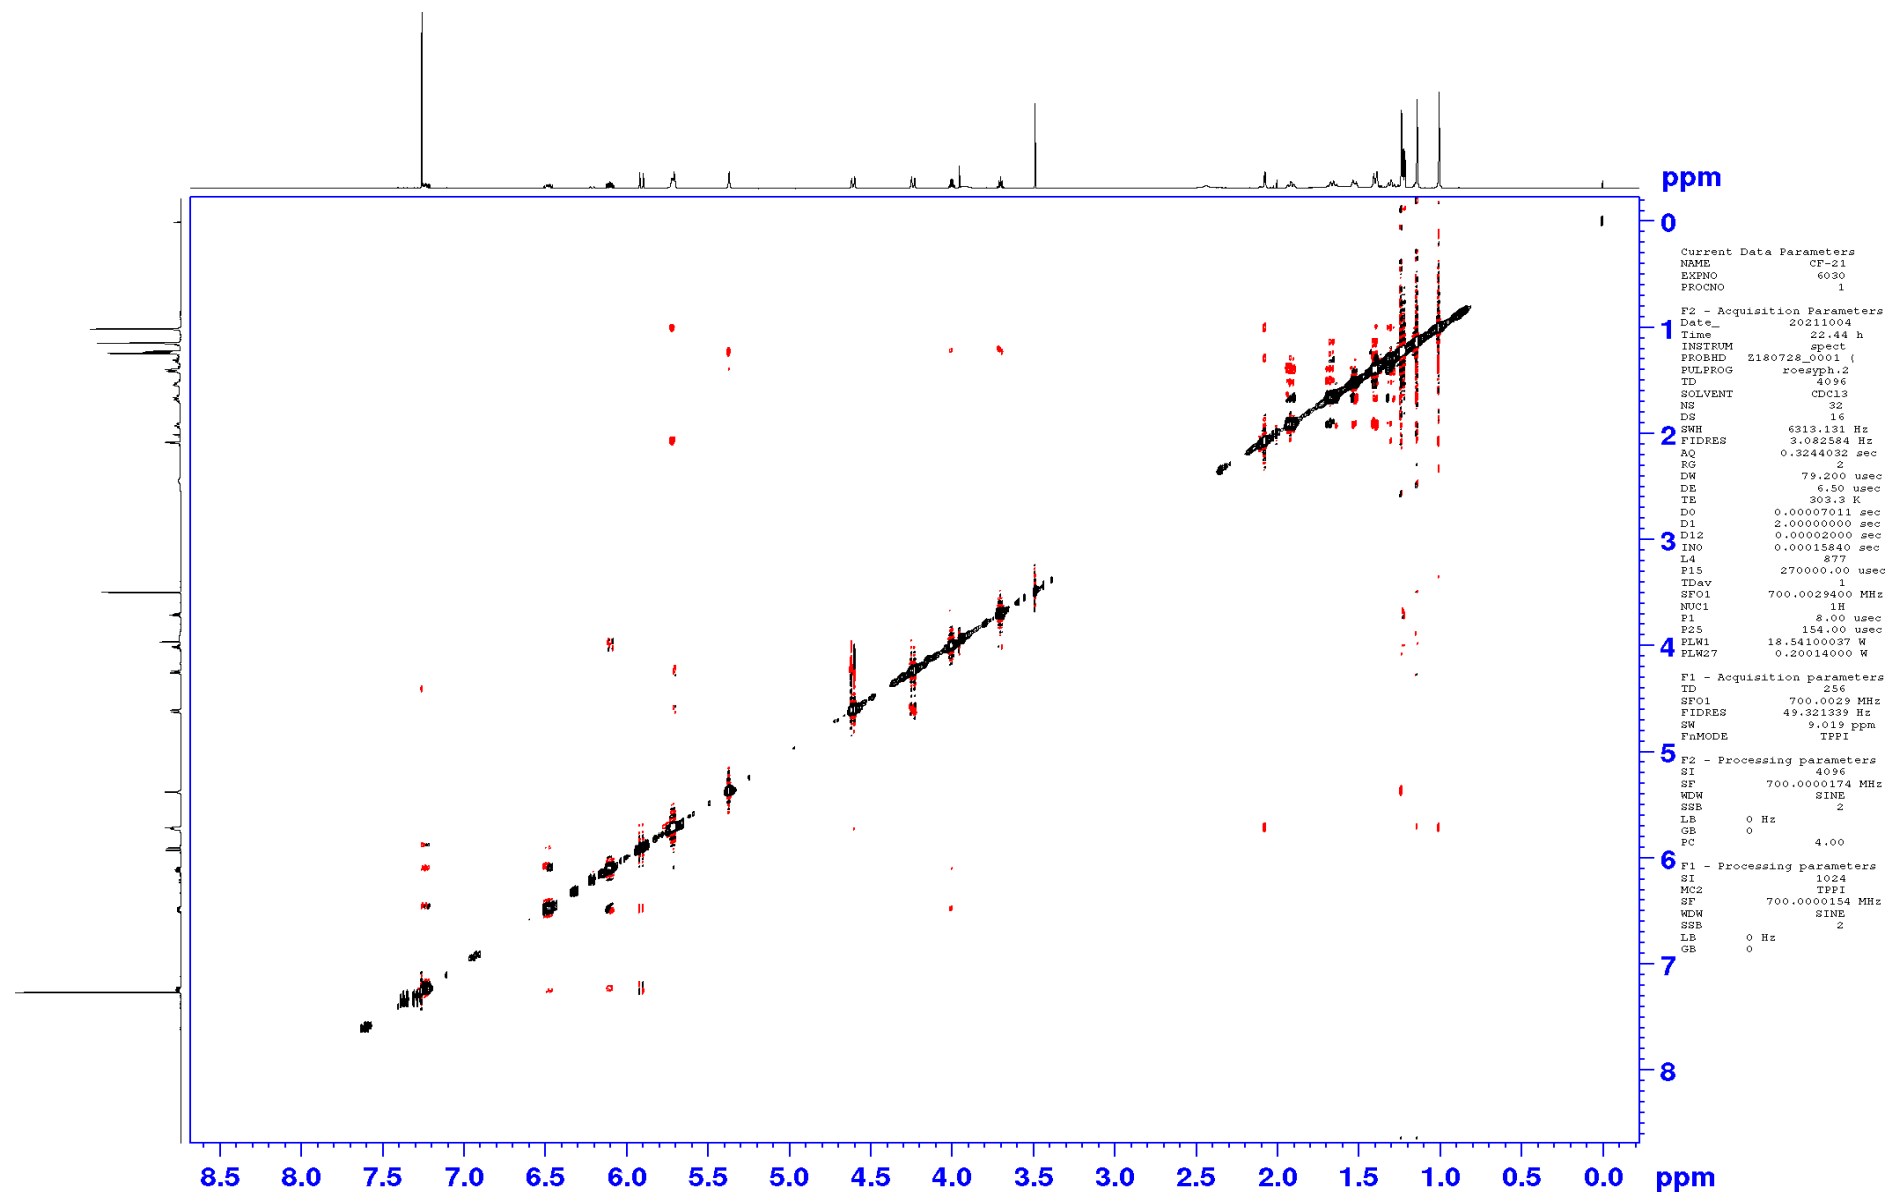

Figure S47. ROESY spectrum (700 MHz,  $\text{CDCl}_3$ ) of **5**

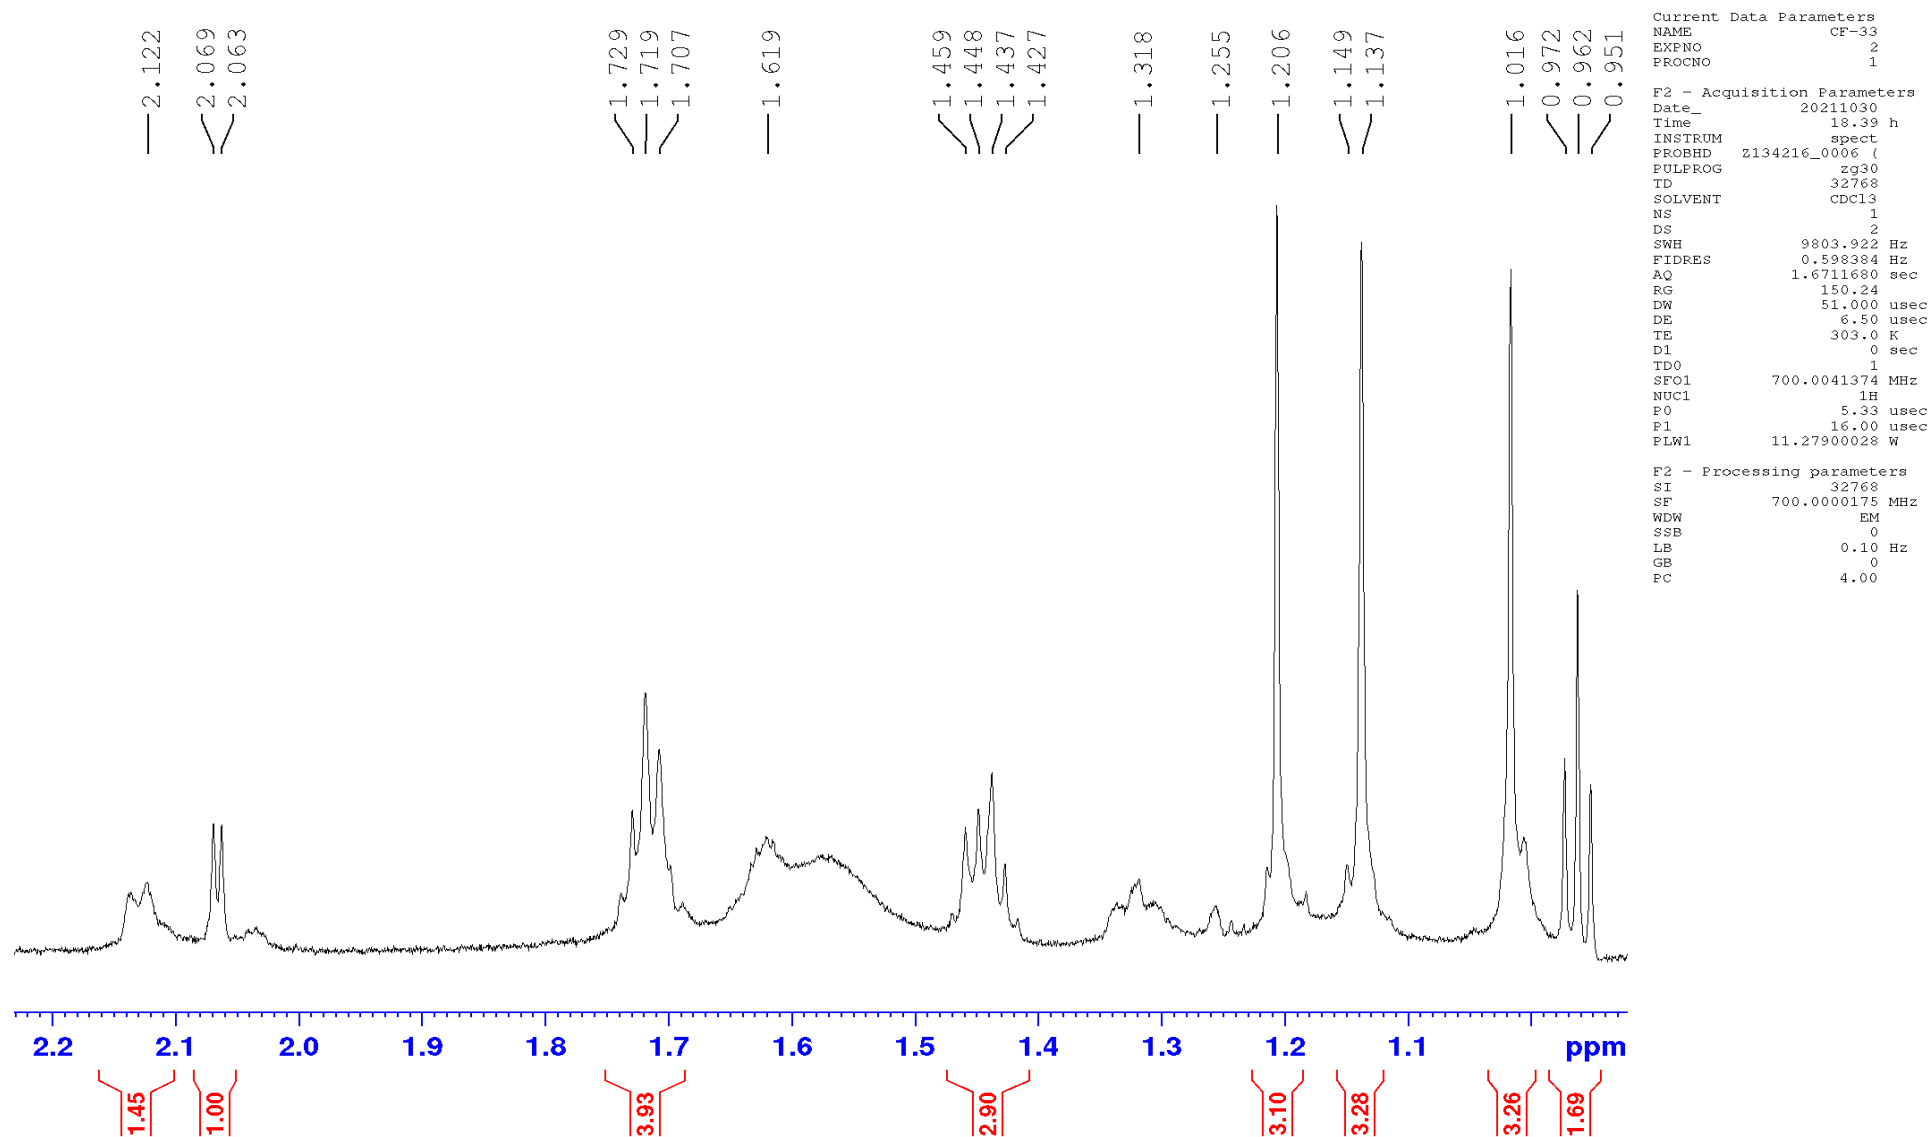

Figure S48. Expanded  $^1\text{H}$  NMR spectrum (700 MHz,  $\text{CDCl}_3$ ) of **9**

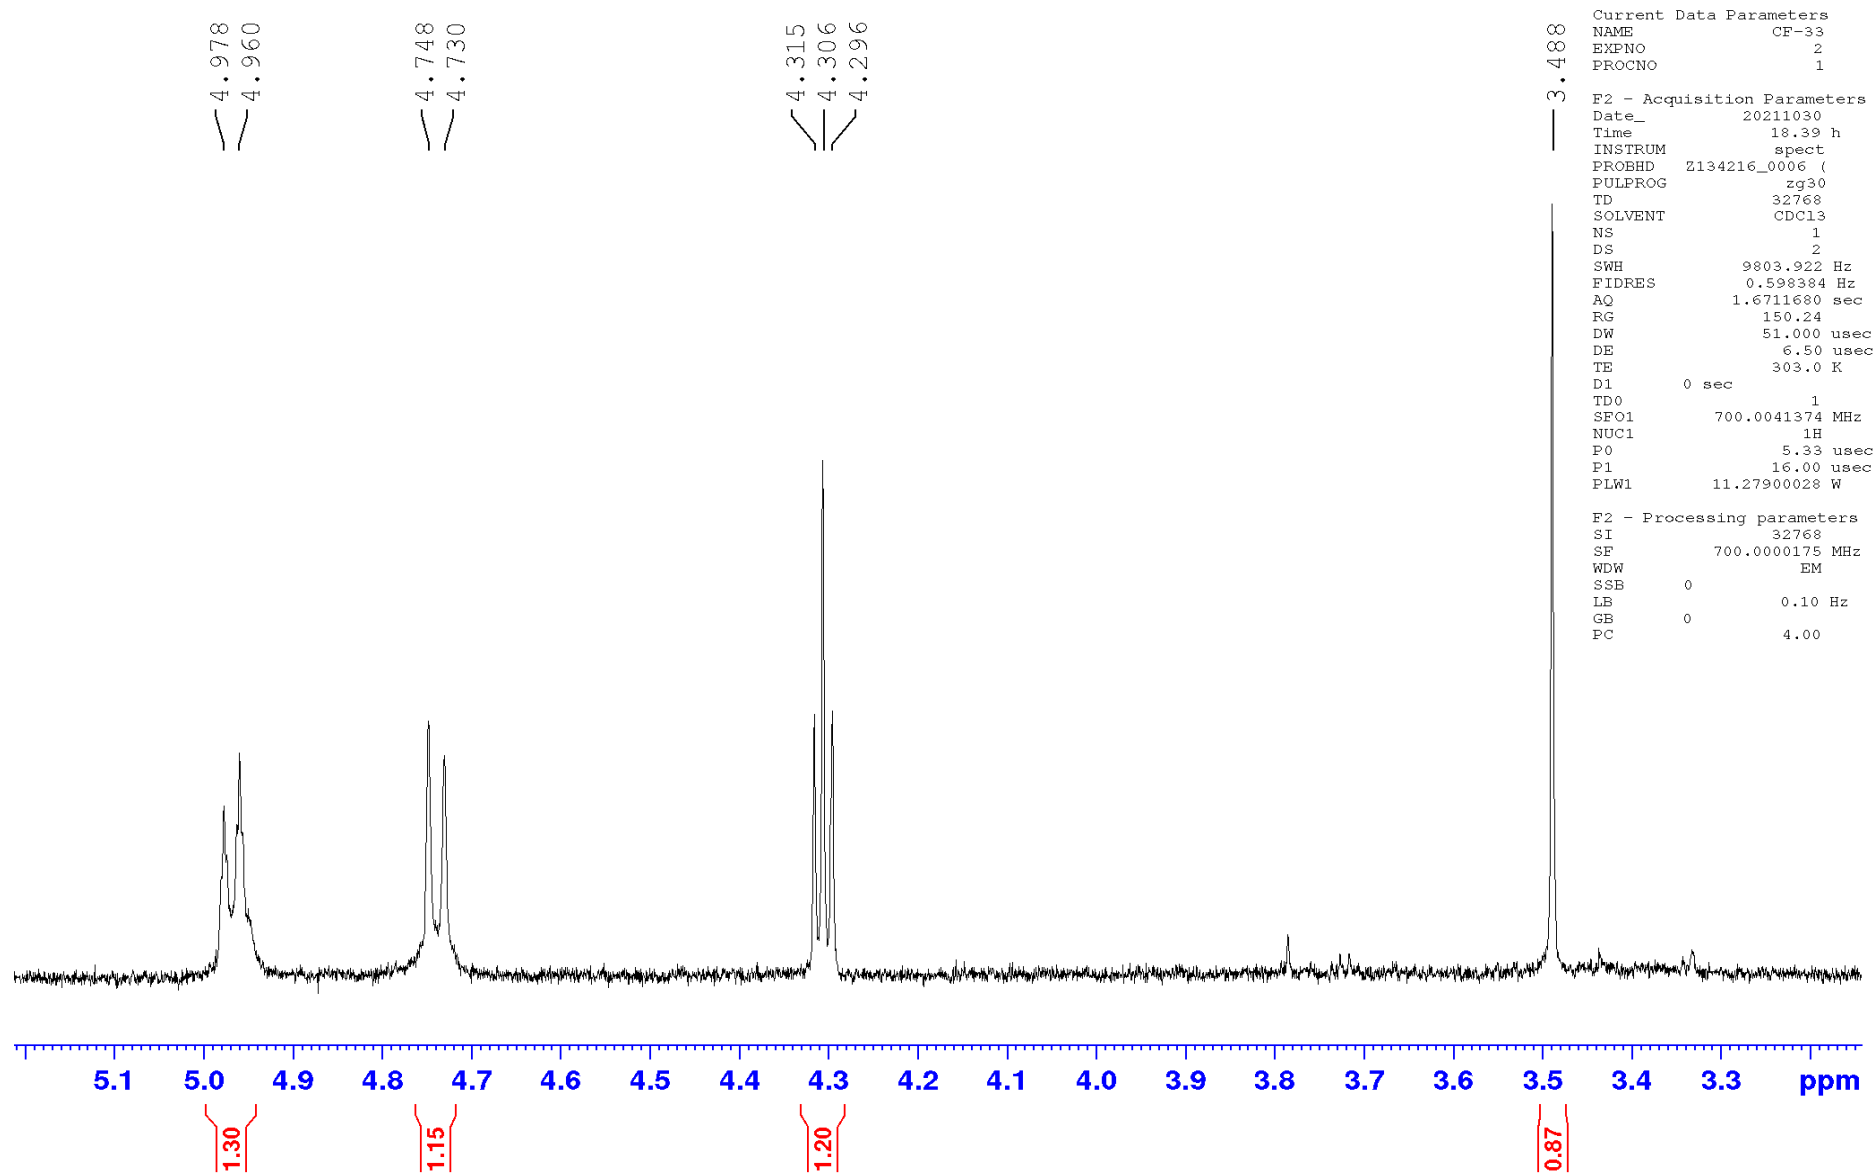

Expanded  $^1\text{H}$  NMR spectrum (700 MHz,  $\text{CDCl}_3$ ) of **9**

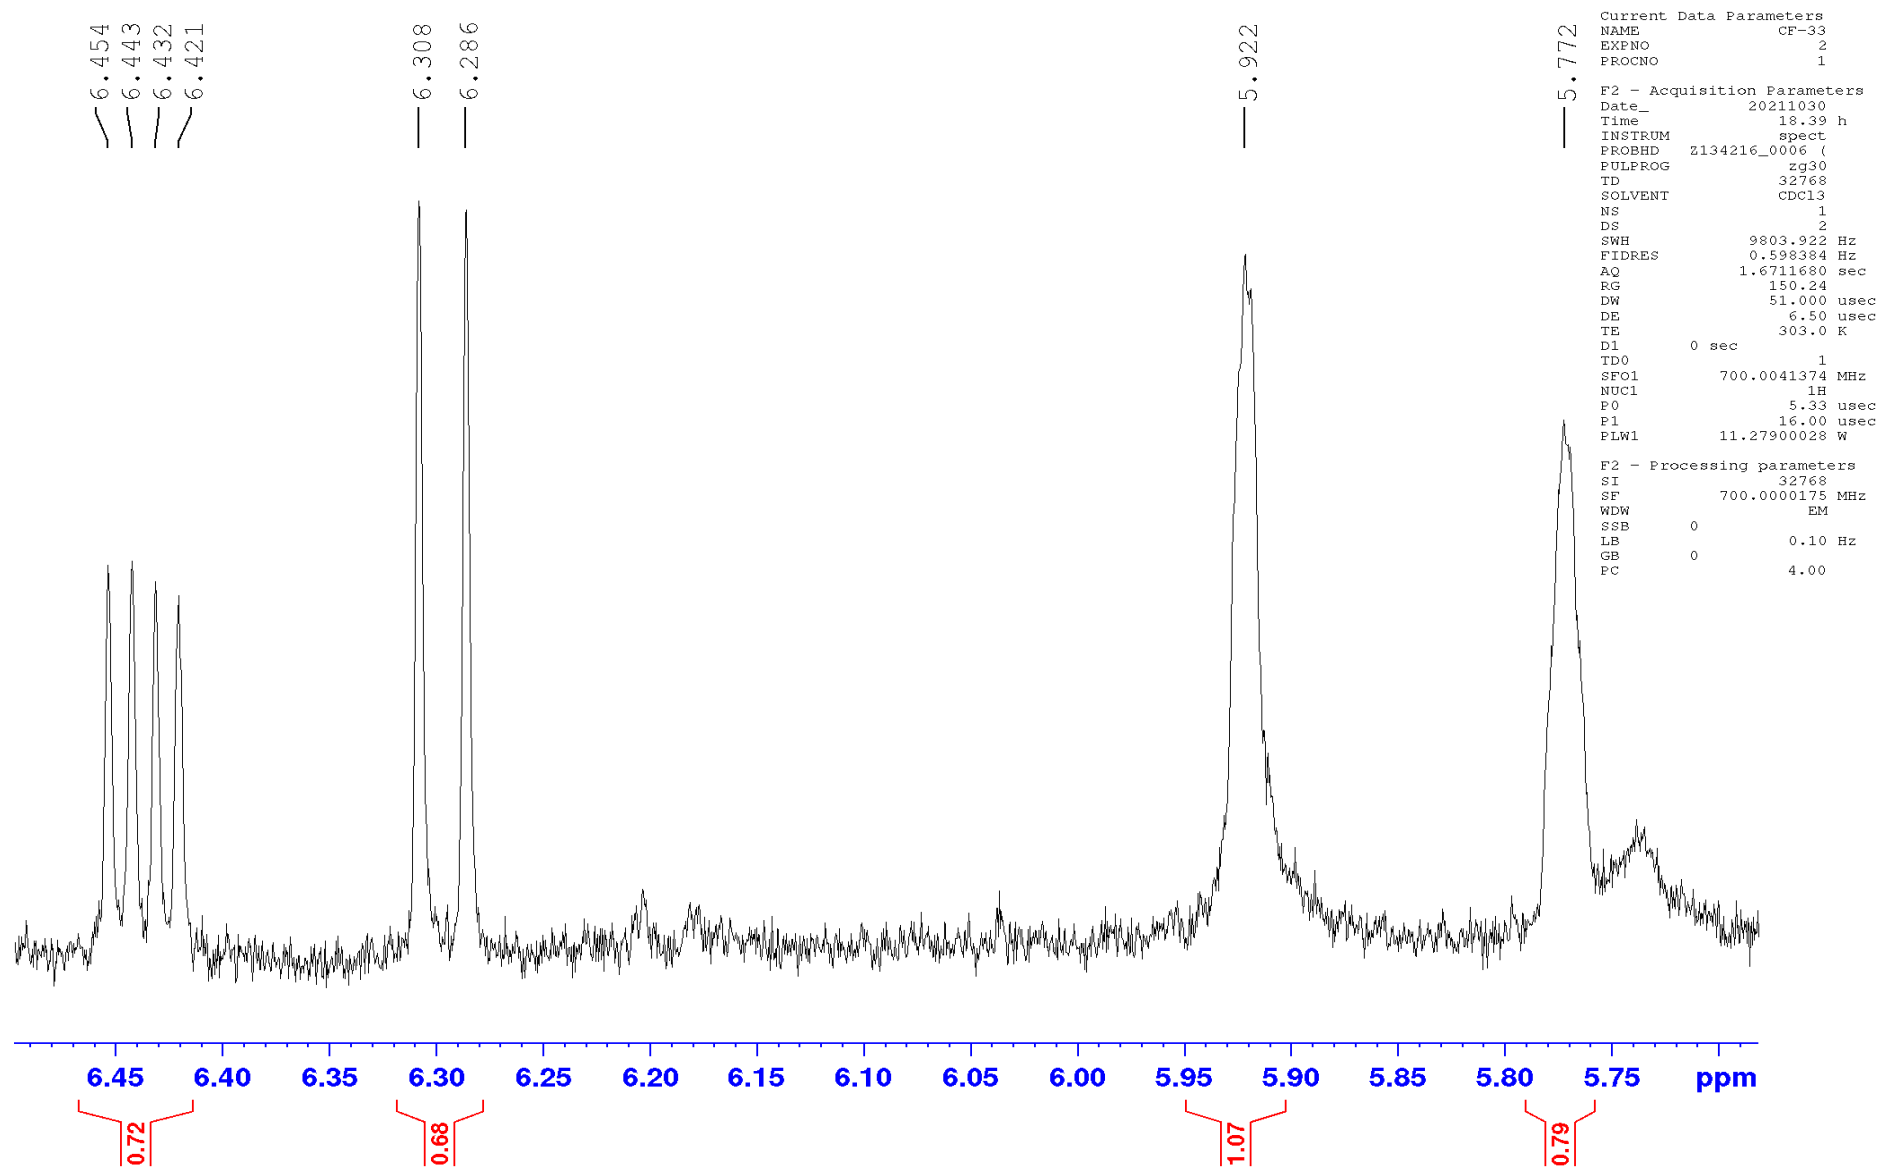

Expanded  $^1\text{H}$  NMR spectrum (700 MHz,  $\text{CDCl}_3$ ) of **9**

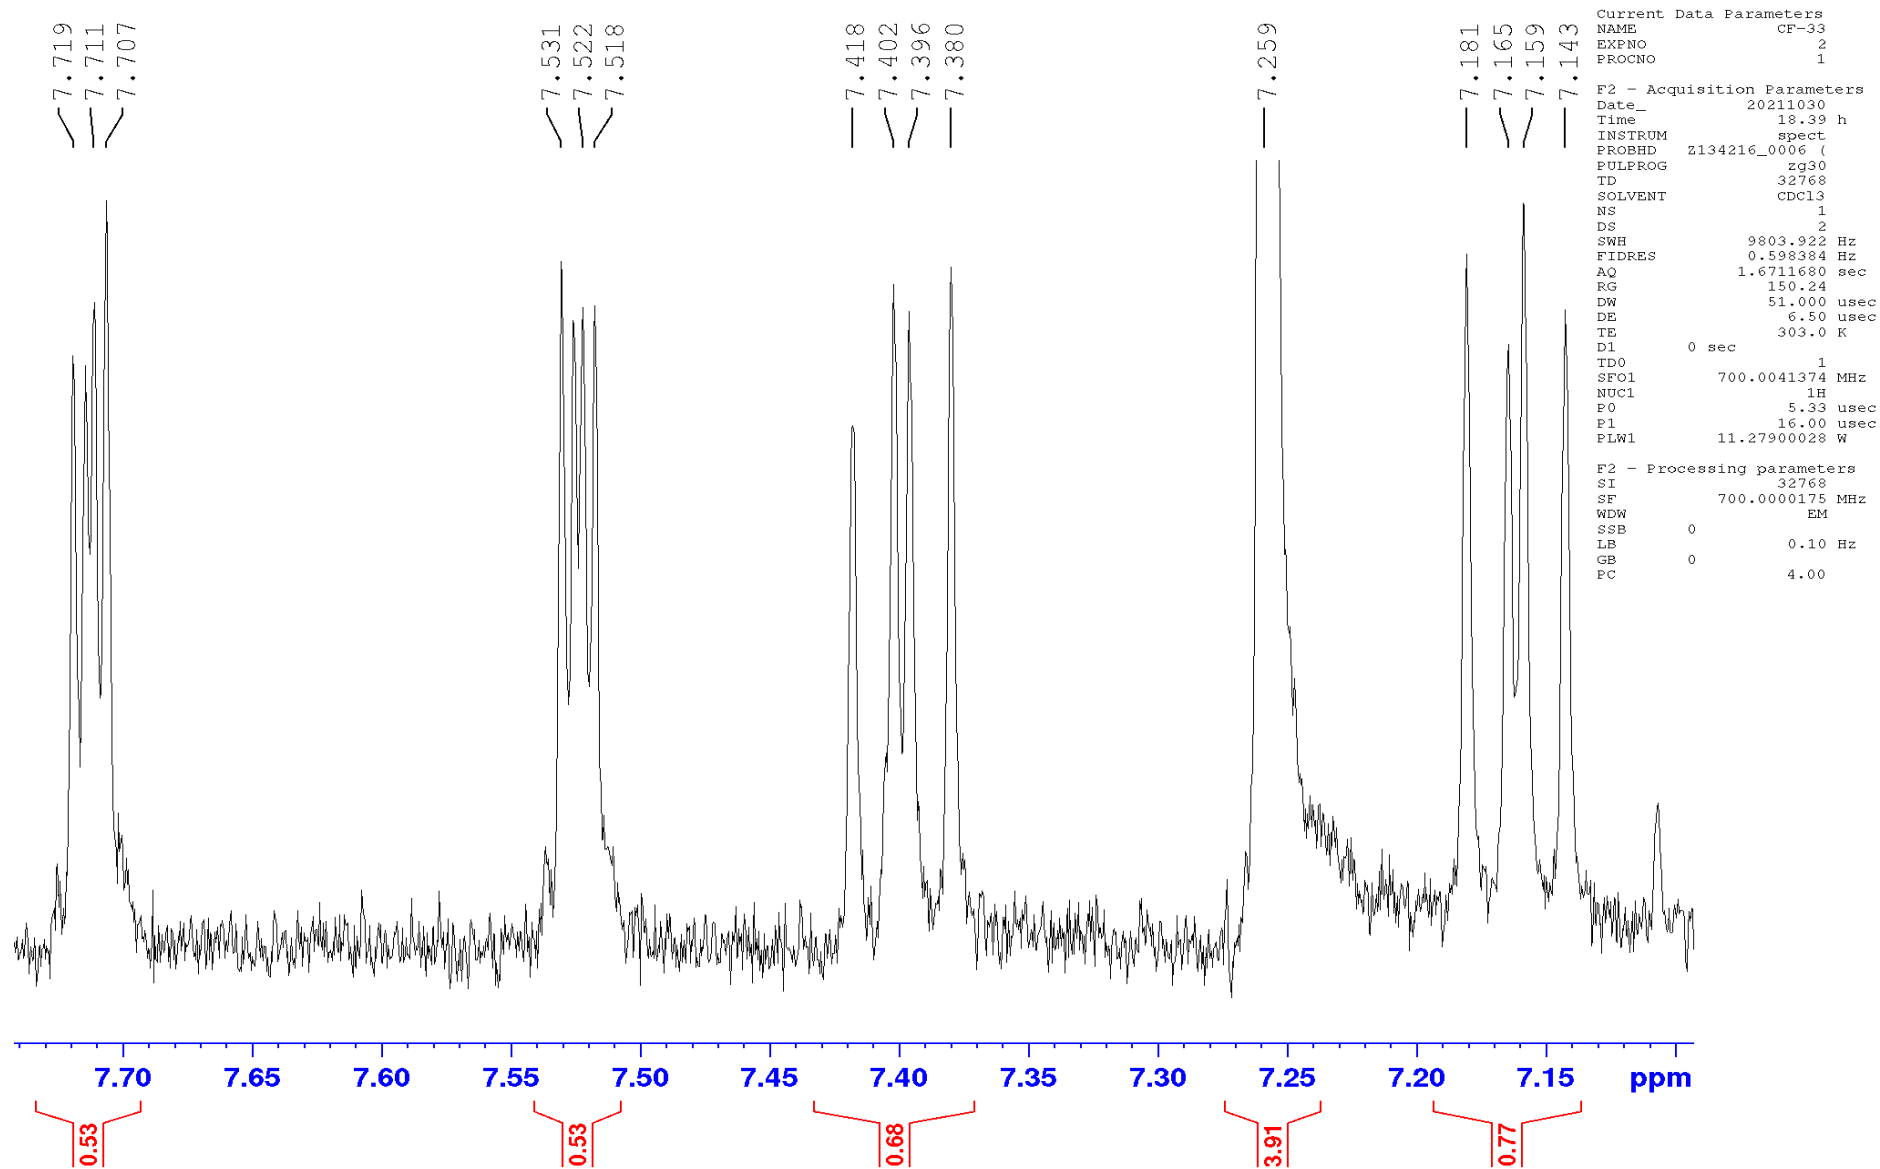

Expanded  $^1\text{H}$  NMR spectrum (700 MHz,  $\text{CDCl}_3$ ) of **9**

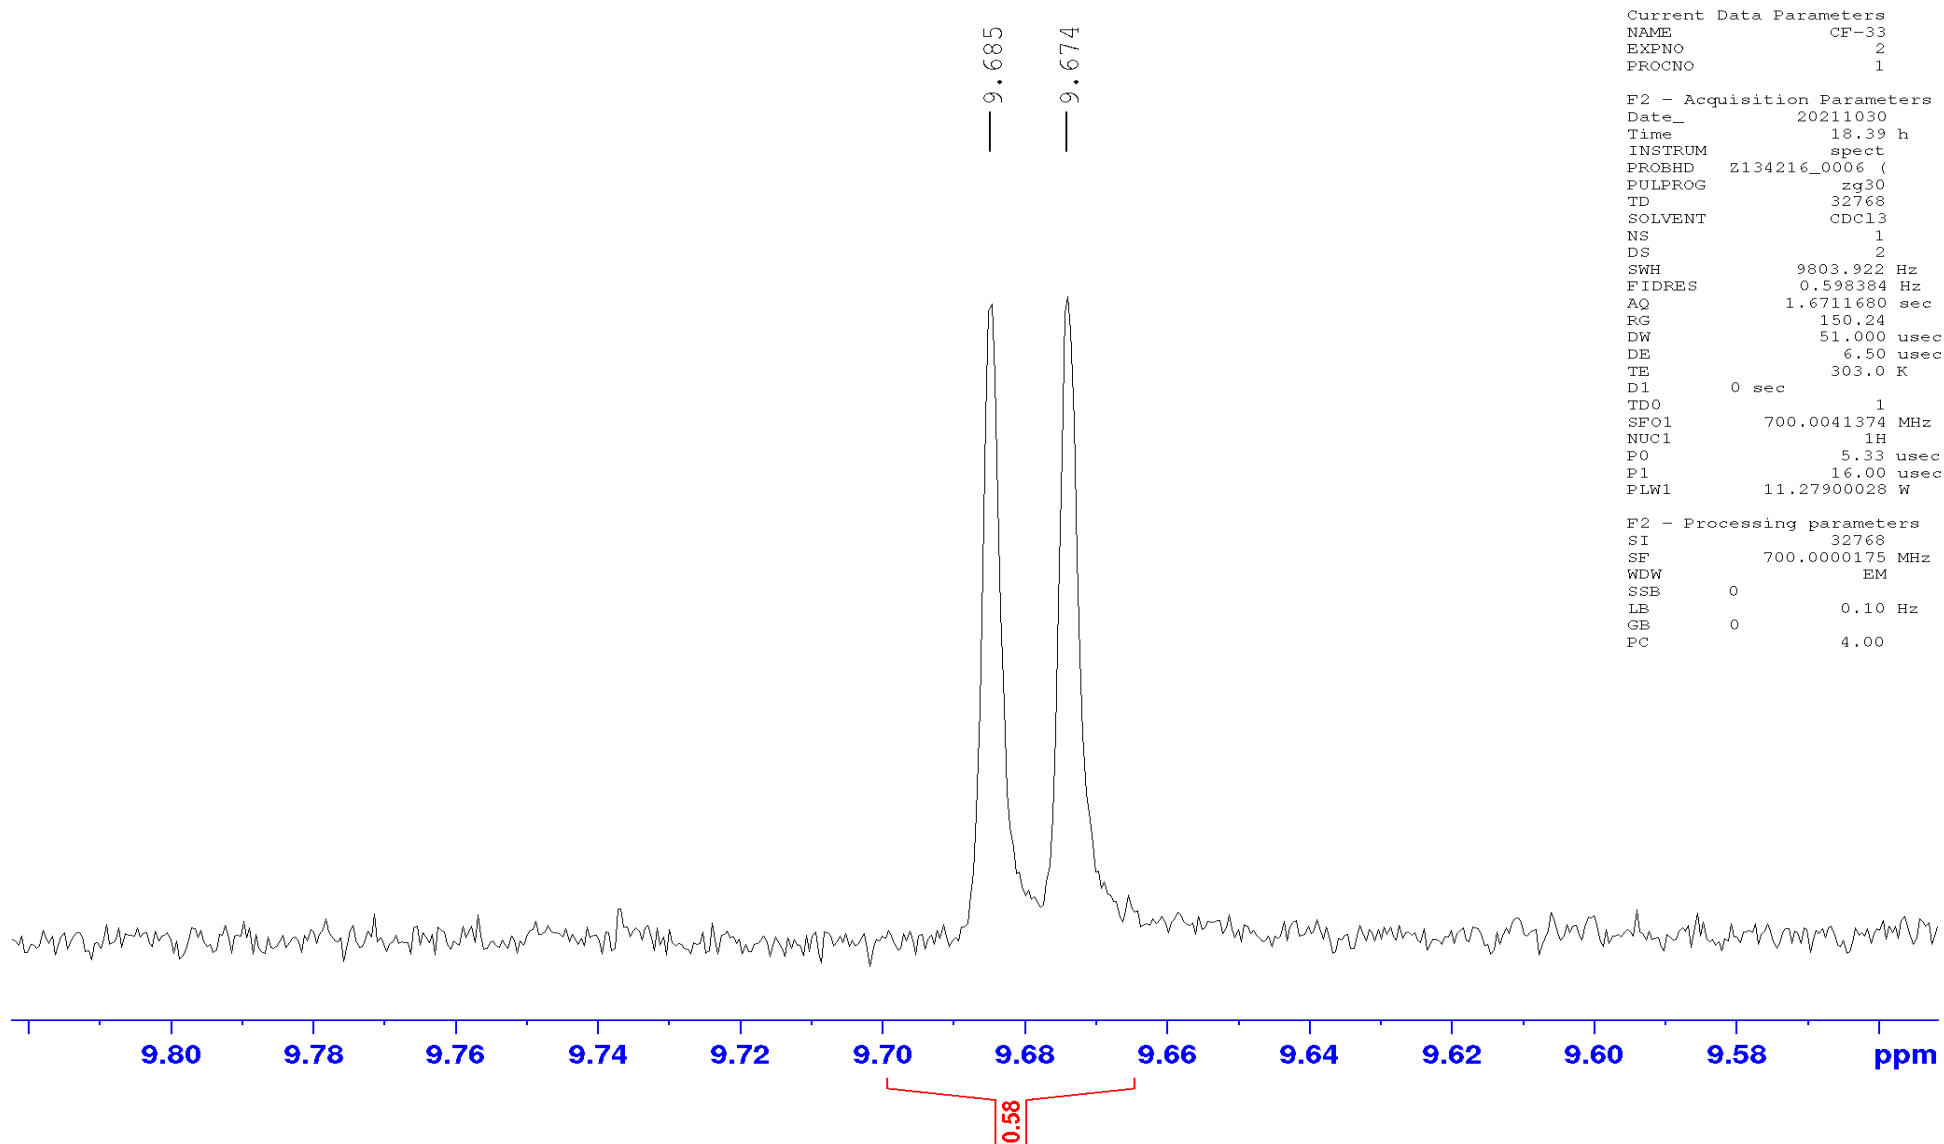

Expanded <sup>1</sup>H NMR spectrum (700 MHz, CDCl<sub>3</sub>) of **9**

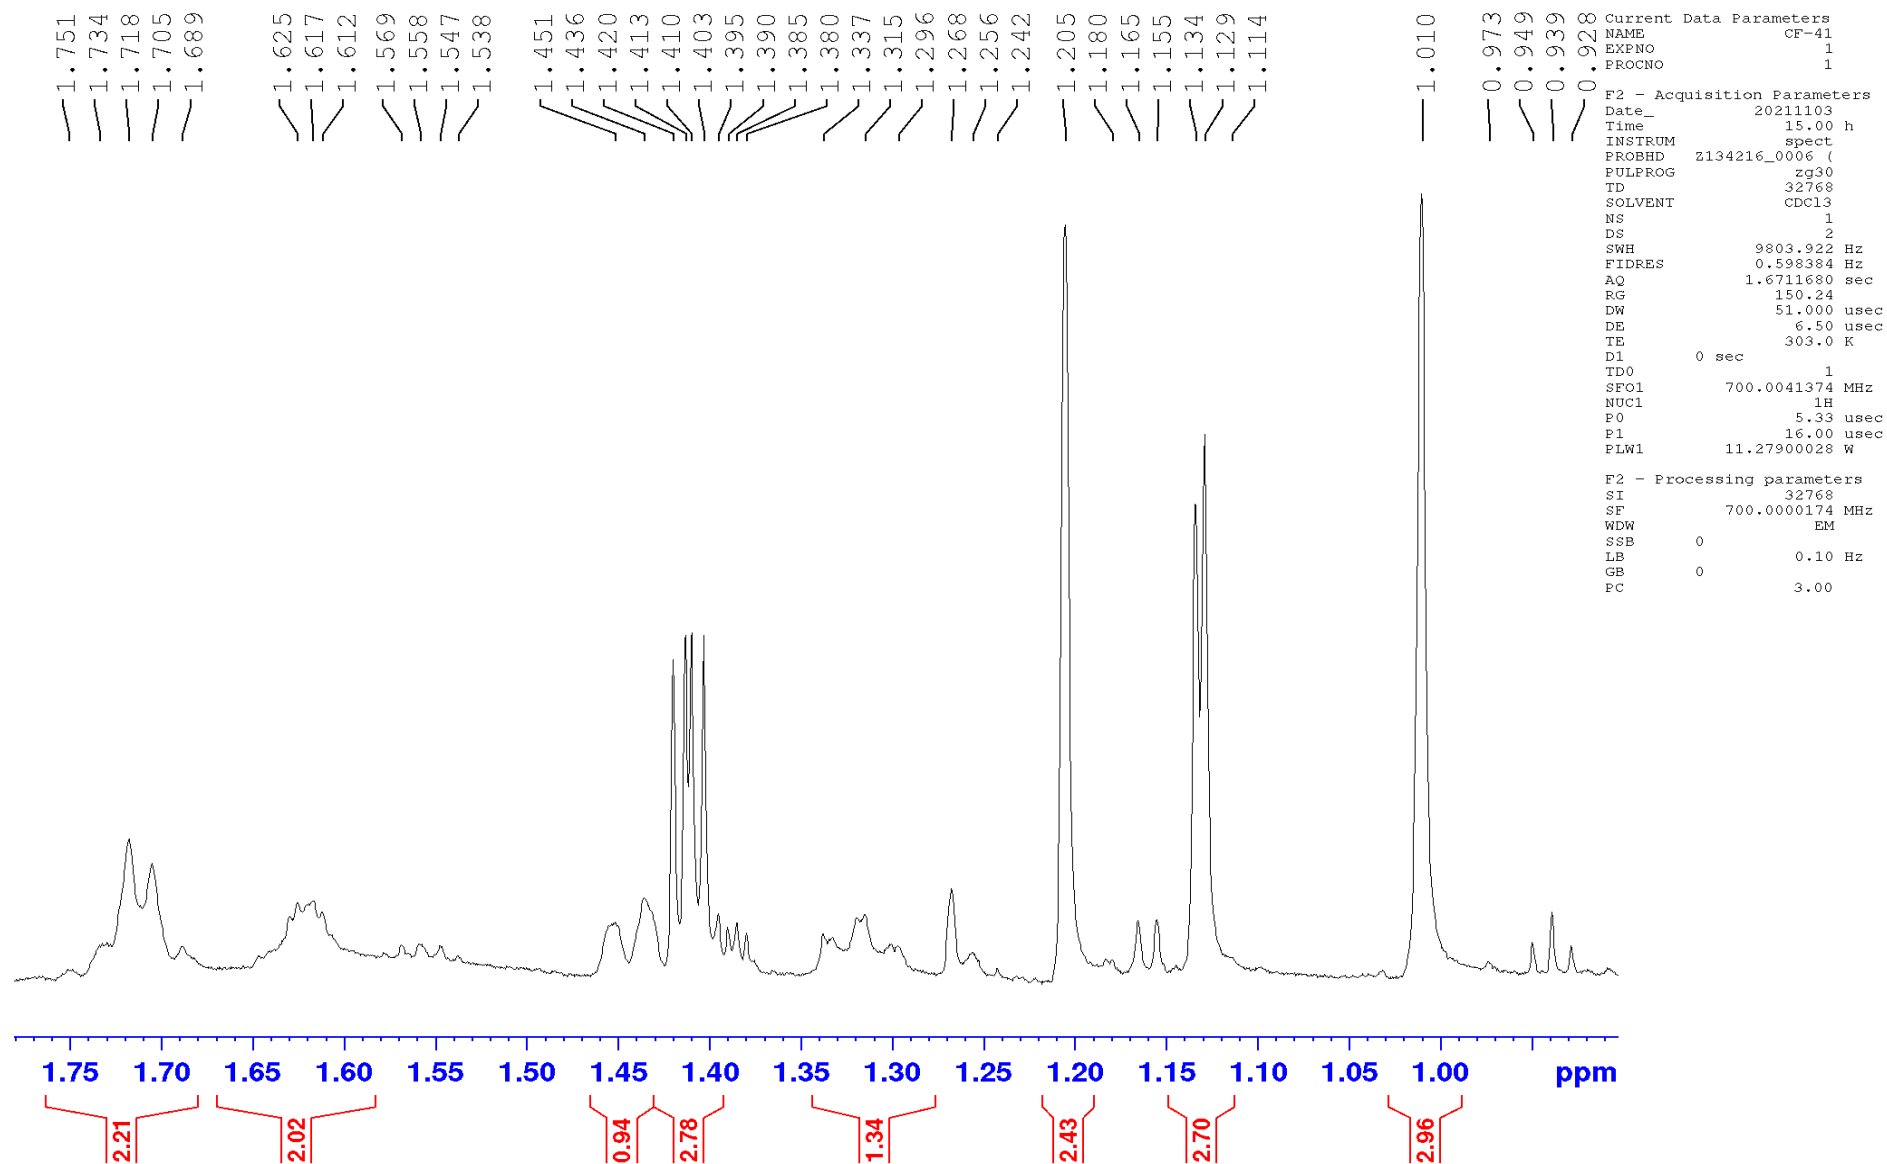

Figure S49. Expanded  $^1\text{H}$  NMR spectrum (700 MHz,  $\text{CDCl}_3$ ) of **10**

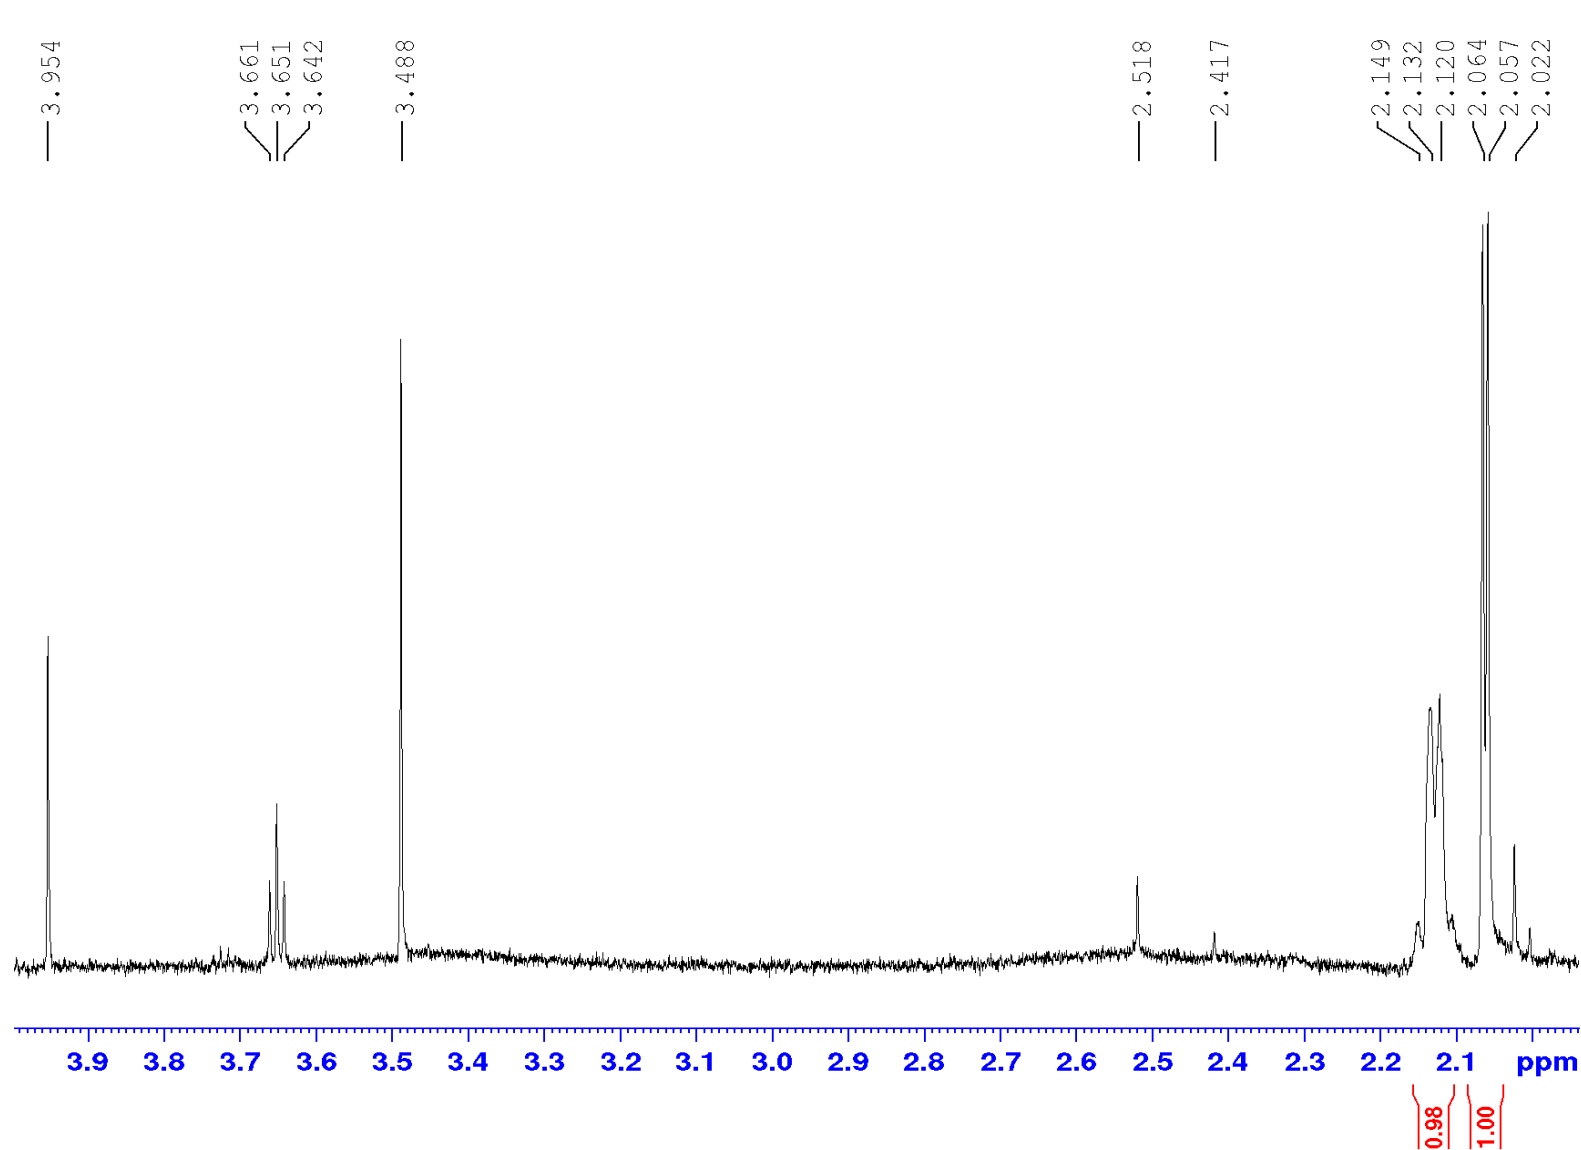

Current Data Parameters  
NAME CF-41  
EXPNO 1  
PROCNO 1

F2 - Acquisition Parameters  
Date\_ 20211103  
Time 15.00 h  
INSTRUM spect  
PROBHD 2134216\_0006 (   
PULPROG zg30  
TD 32768  
SOLVENT CDCl3  
NS 1  
DS 2  
SWH 9803.922 Hz  
FIDRES 0.598384 Hz  
AQ 1.6711680 sec  
RG 150.24  
DW 51.000 usec  
DE 6.50 usec  
TE 303.0 K  
D1 0 sec  
TD0 1  
SFO1 700.0041374 MHz  
NUC1 1H  
P0 5.33 usec  
P1 16.00 usec  
PLW1 11.27900028 W

F2 - Processing parameters  
SI 32768  
SF 700.0000174 MHz  
WDW EM  
SSB 0  
LB 0.10 Hz  
GB 0  
PC 3.00

Expanded  $^1\text{H}$  NMR spectrum (700 MHz,  $\text{CDCl}_3$ ) of **10**

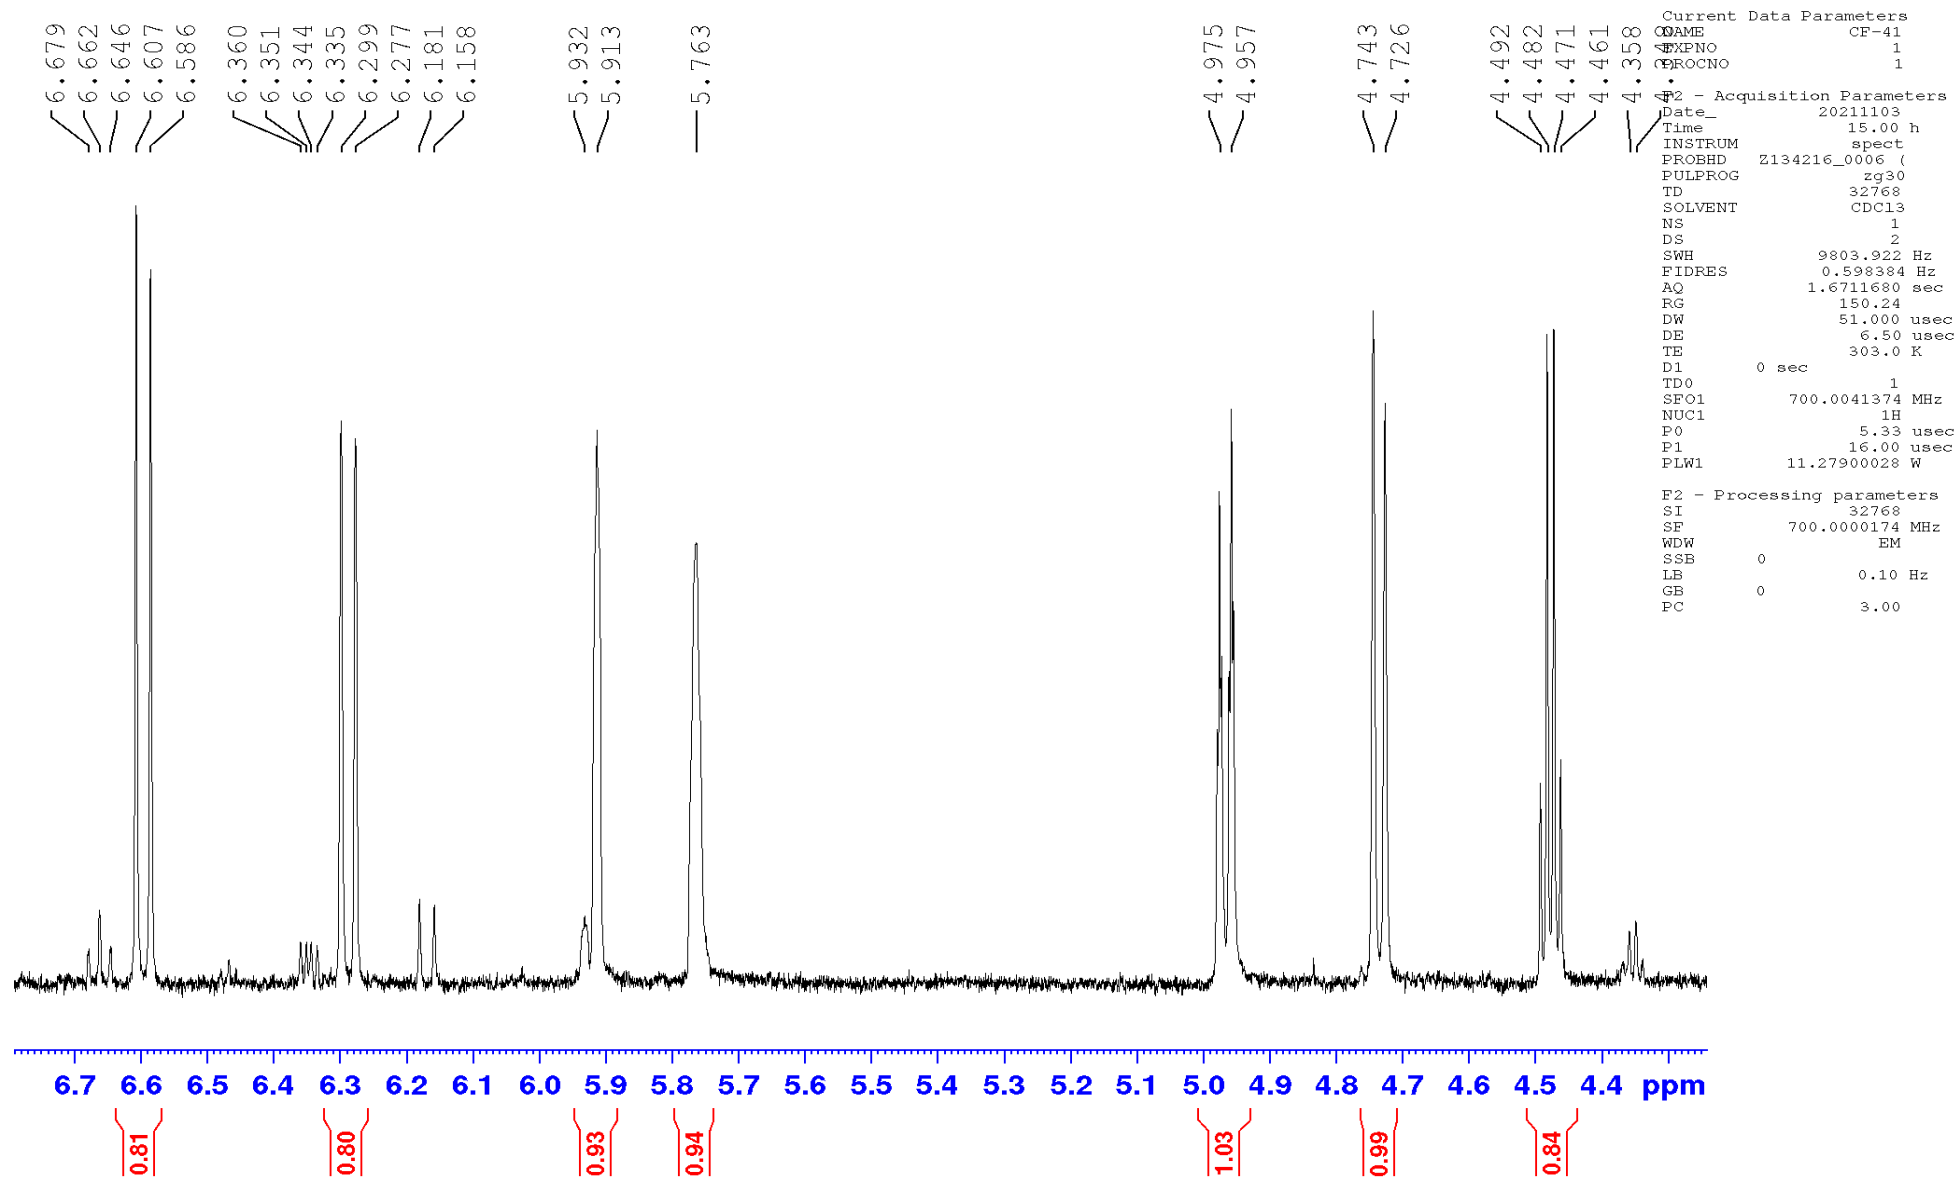

Expanded  $^1\text{H}$  NMR spectrum (700 MHz,  $\text{CDCl}_3$ ) of **10**

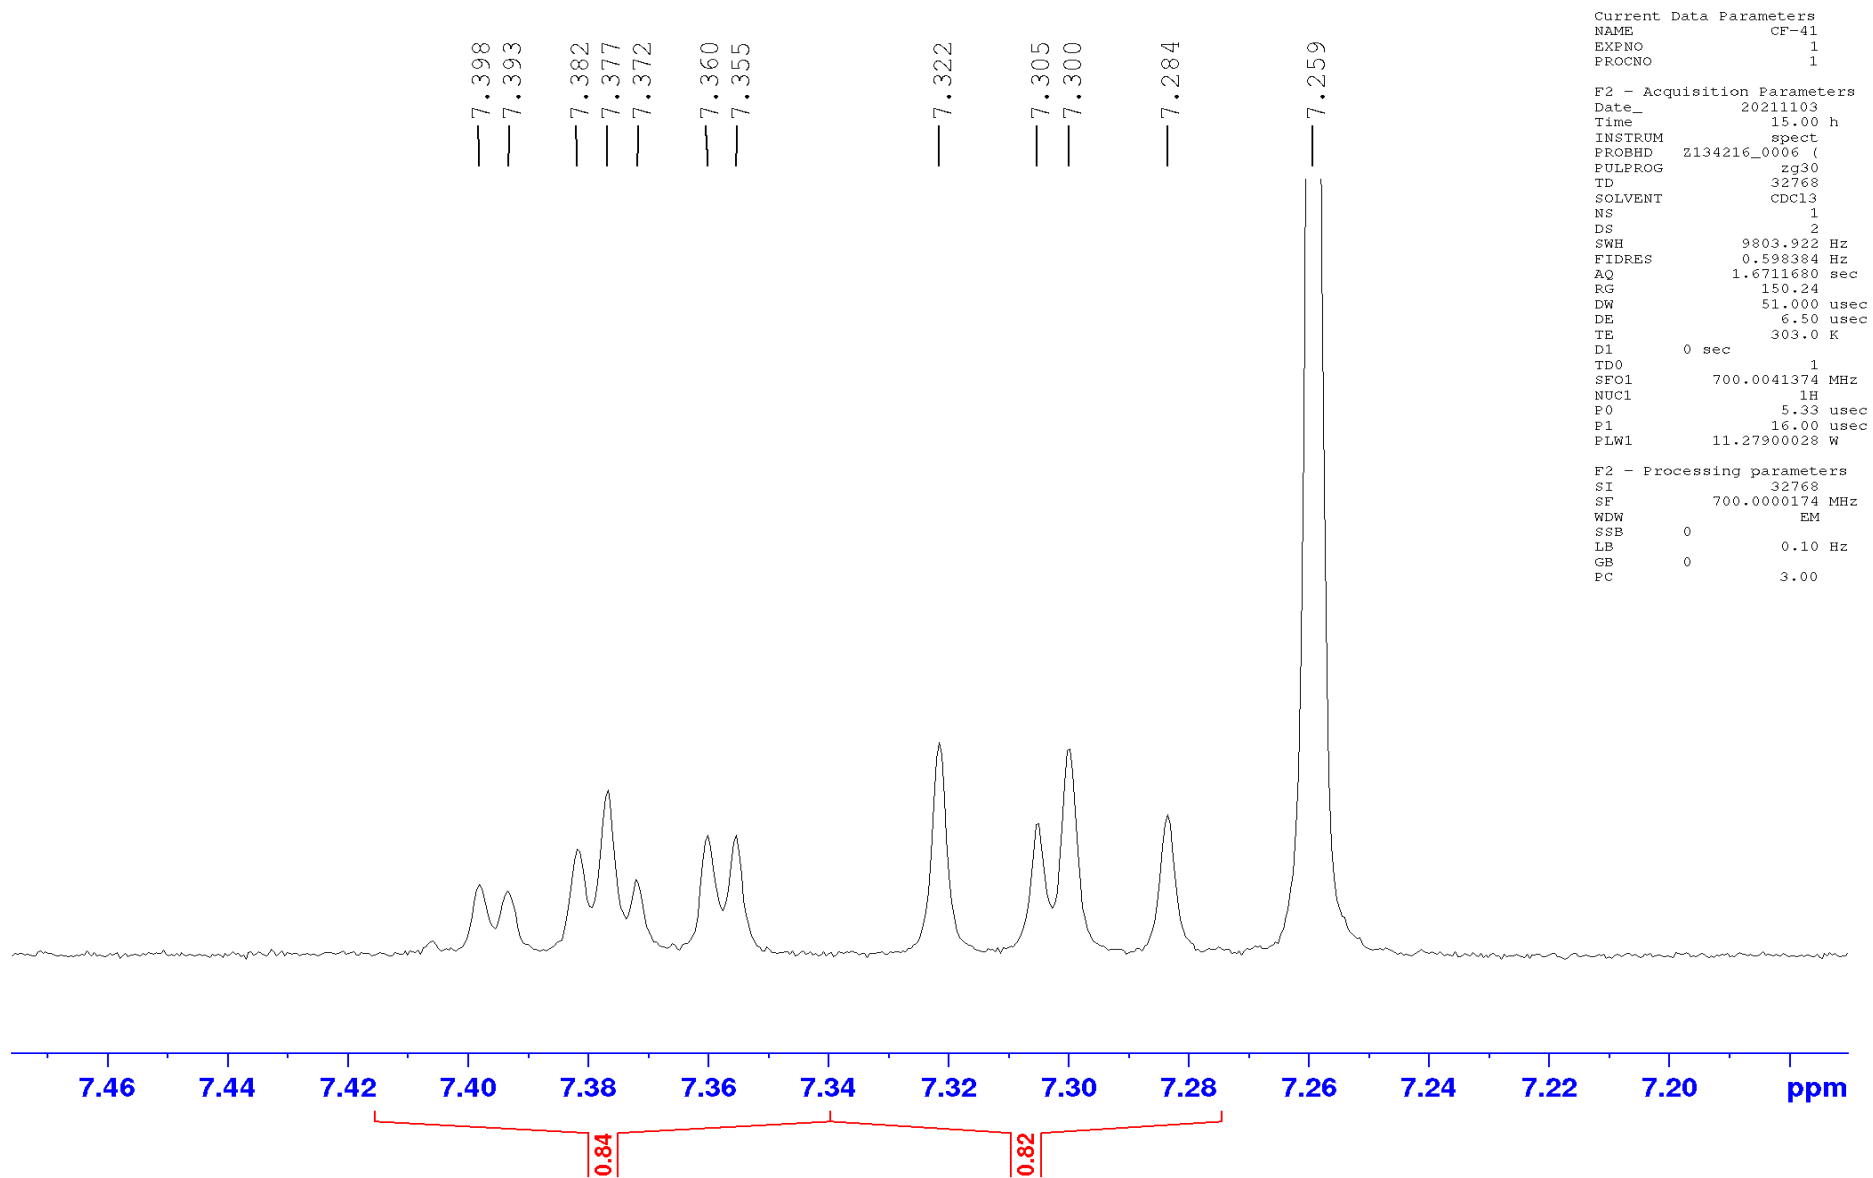

Expanded  $^1\text{H}$  NMR spectrum (700 MHz,  $\text{CDCl}_3$ ) of **10**

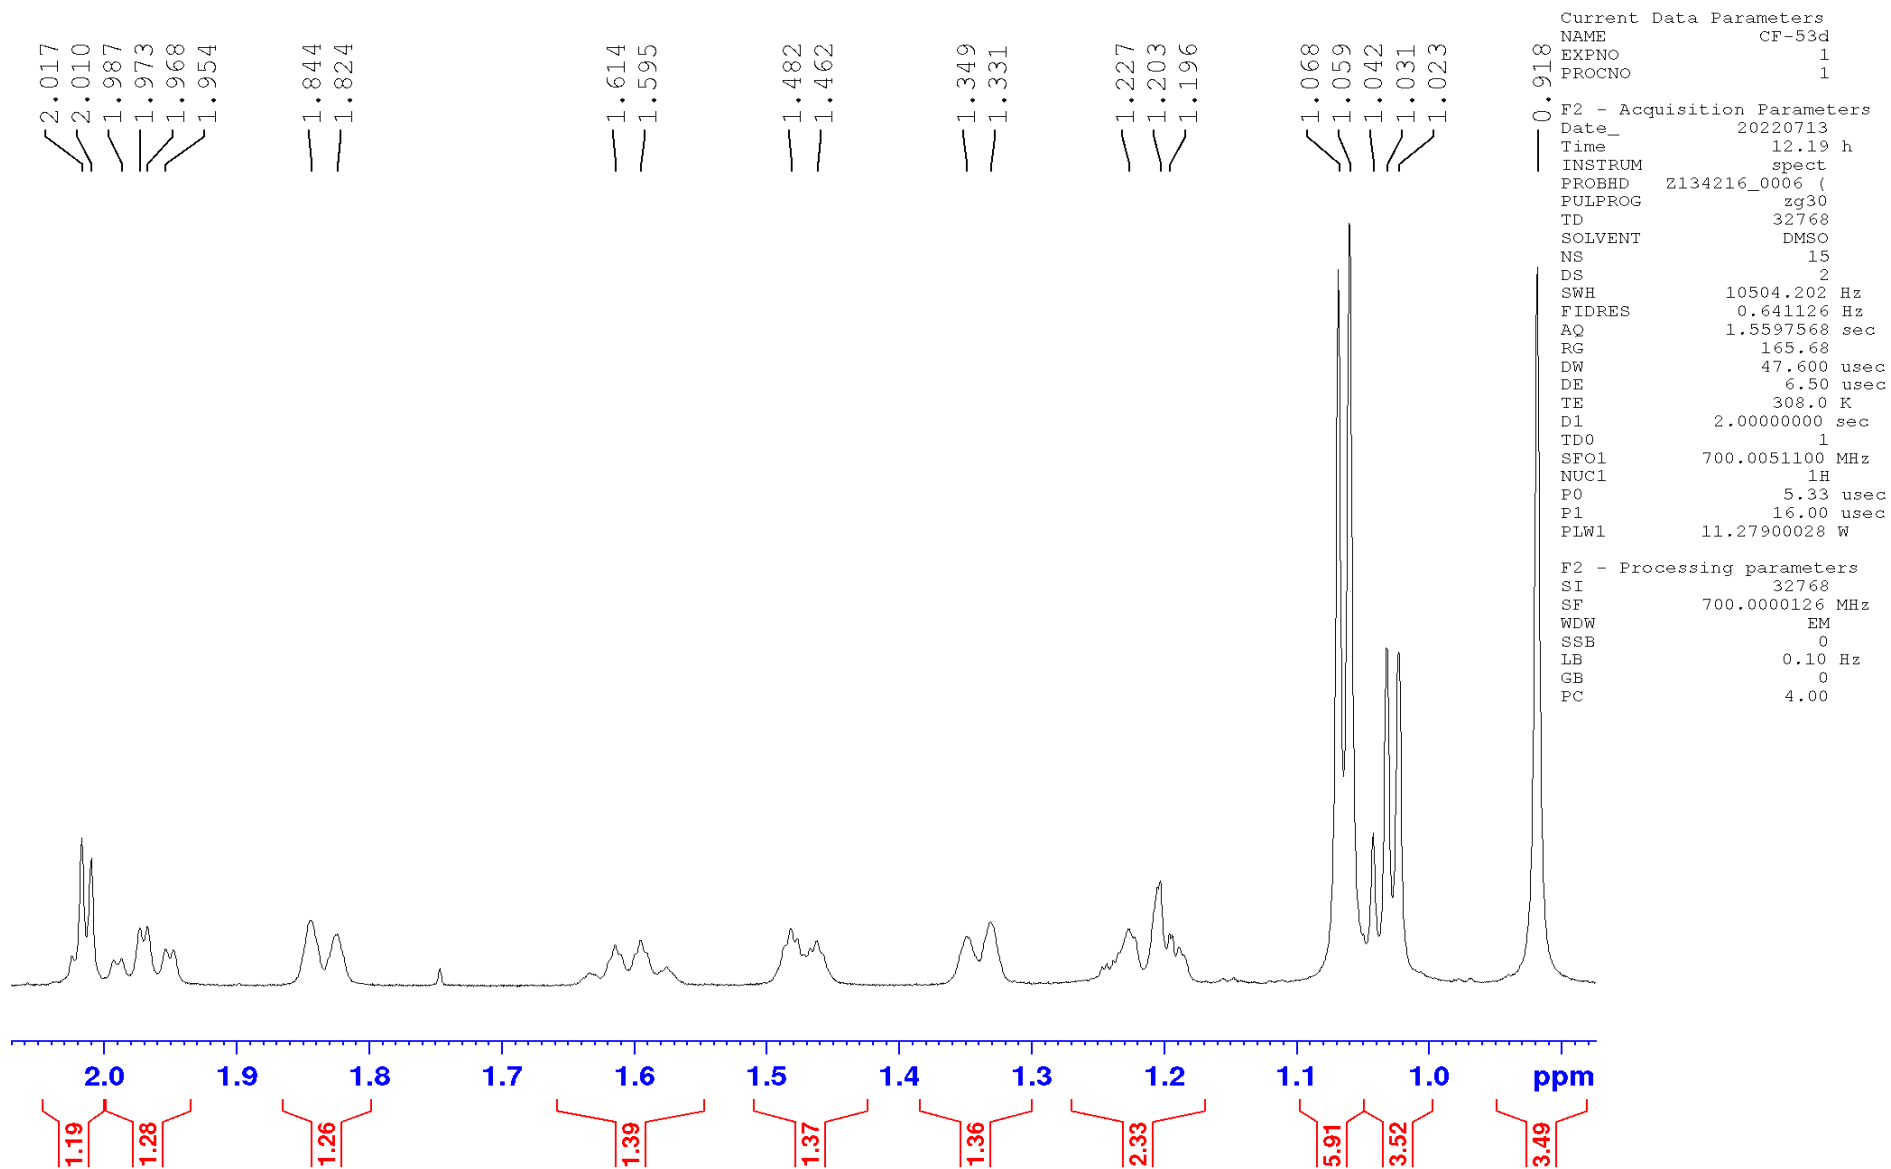

Figure S50. Expanded  $^1\text{H}$  NMR spectrum (700 MHz,  $\text{DMSO-d}_6$ ) of **11**

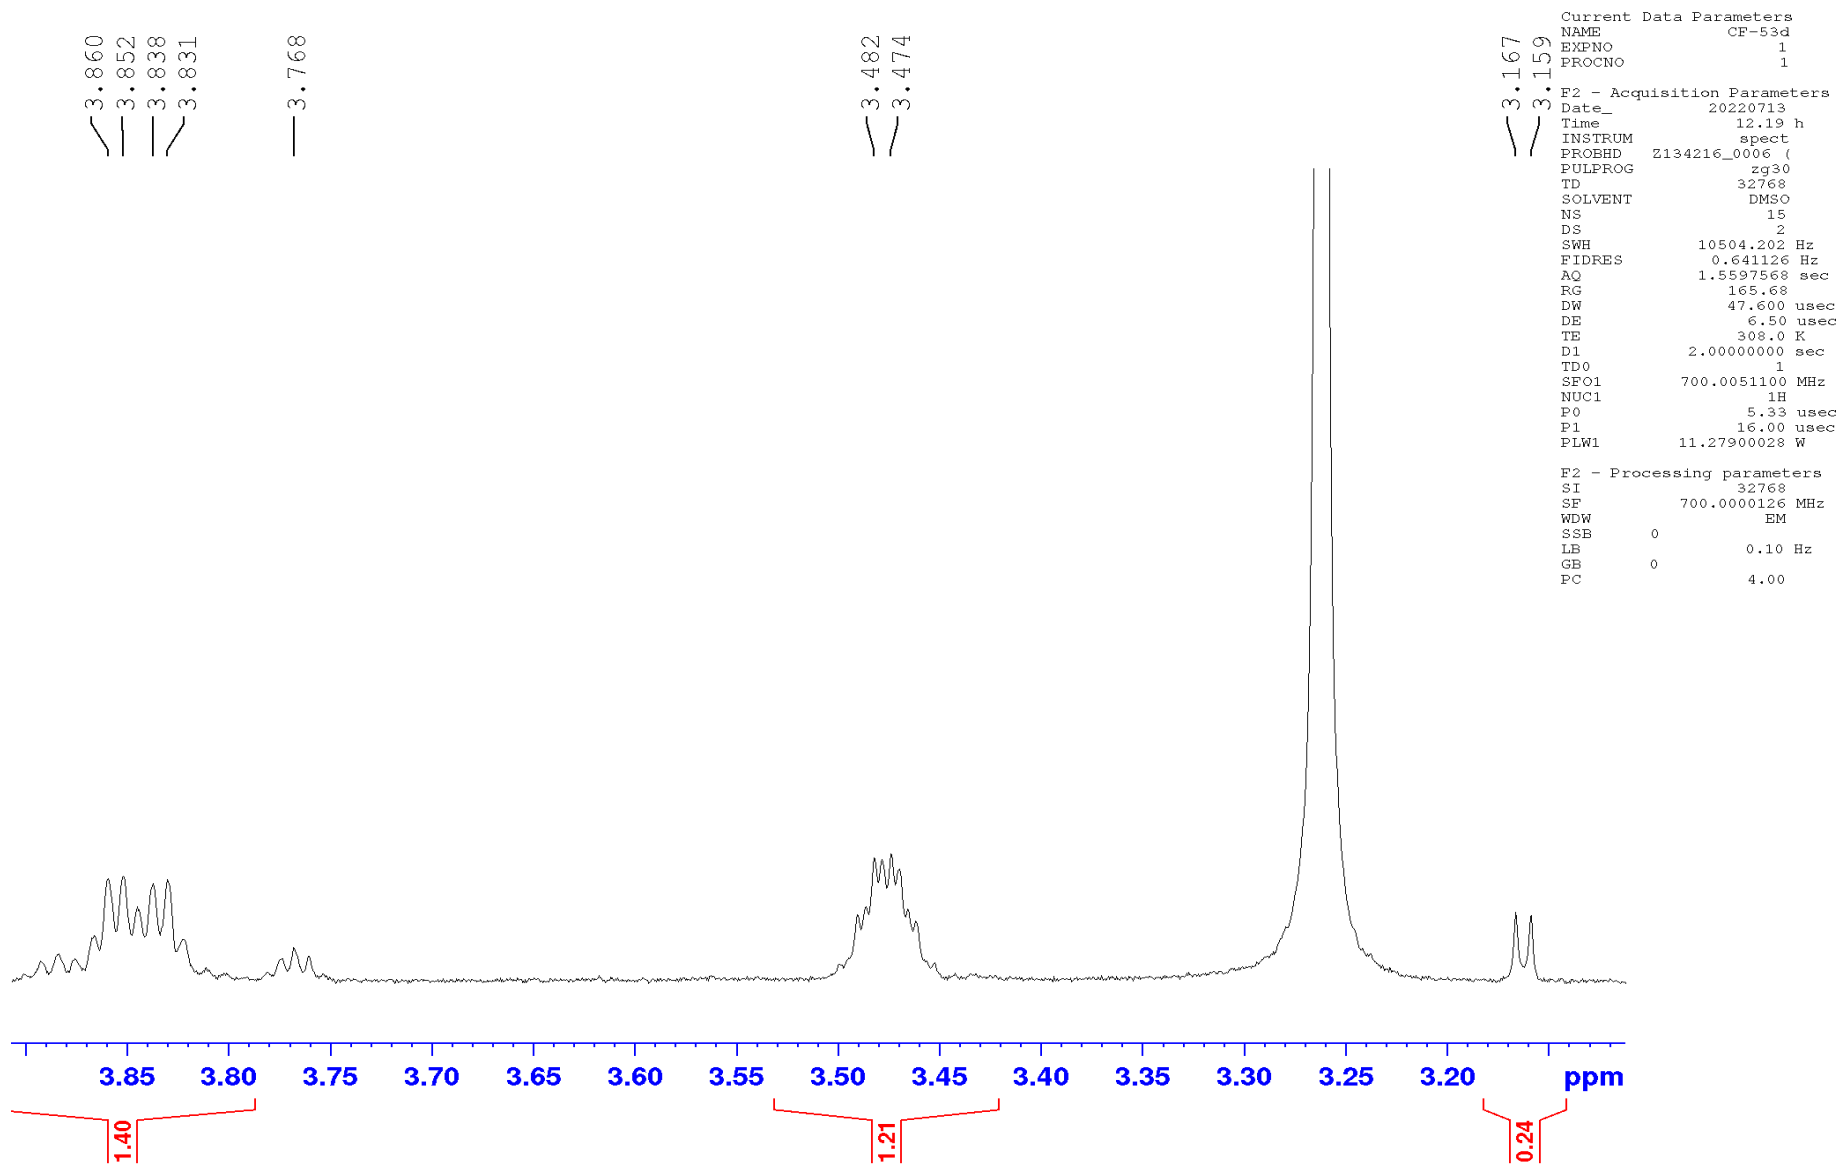

Expanded  $^1\text{H}$  NMR spectrum (700 MHz,  $\text{DMSO-d}_6$ ) of **11**

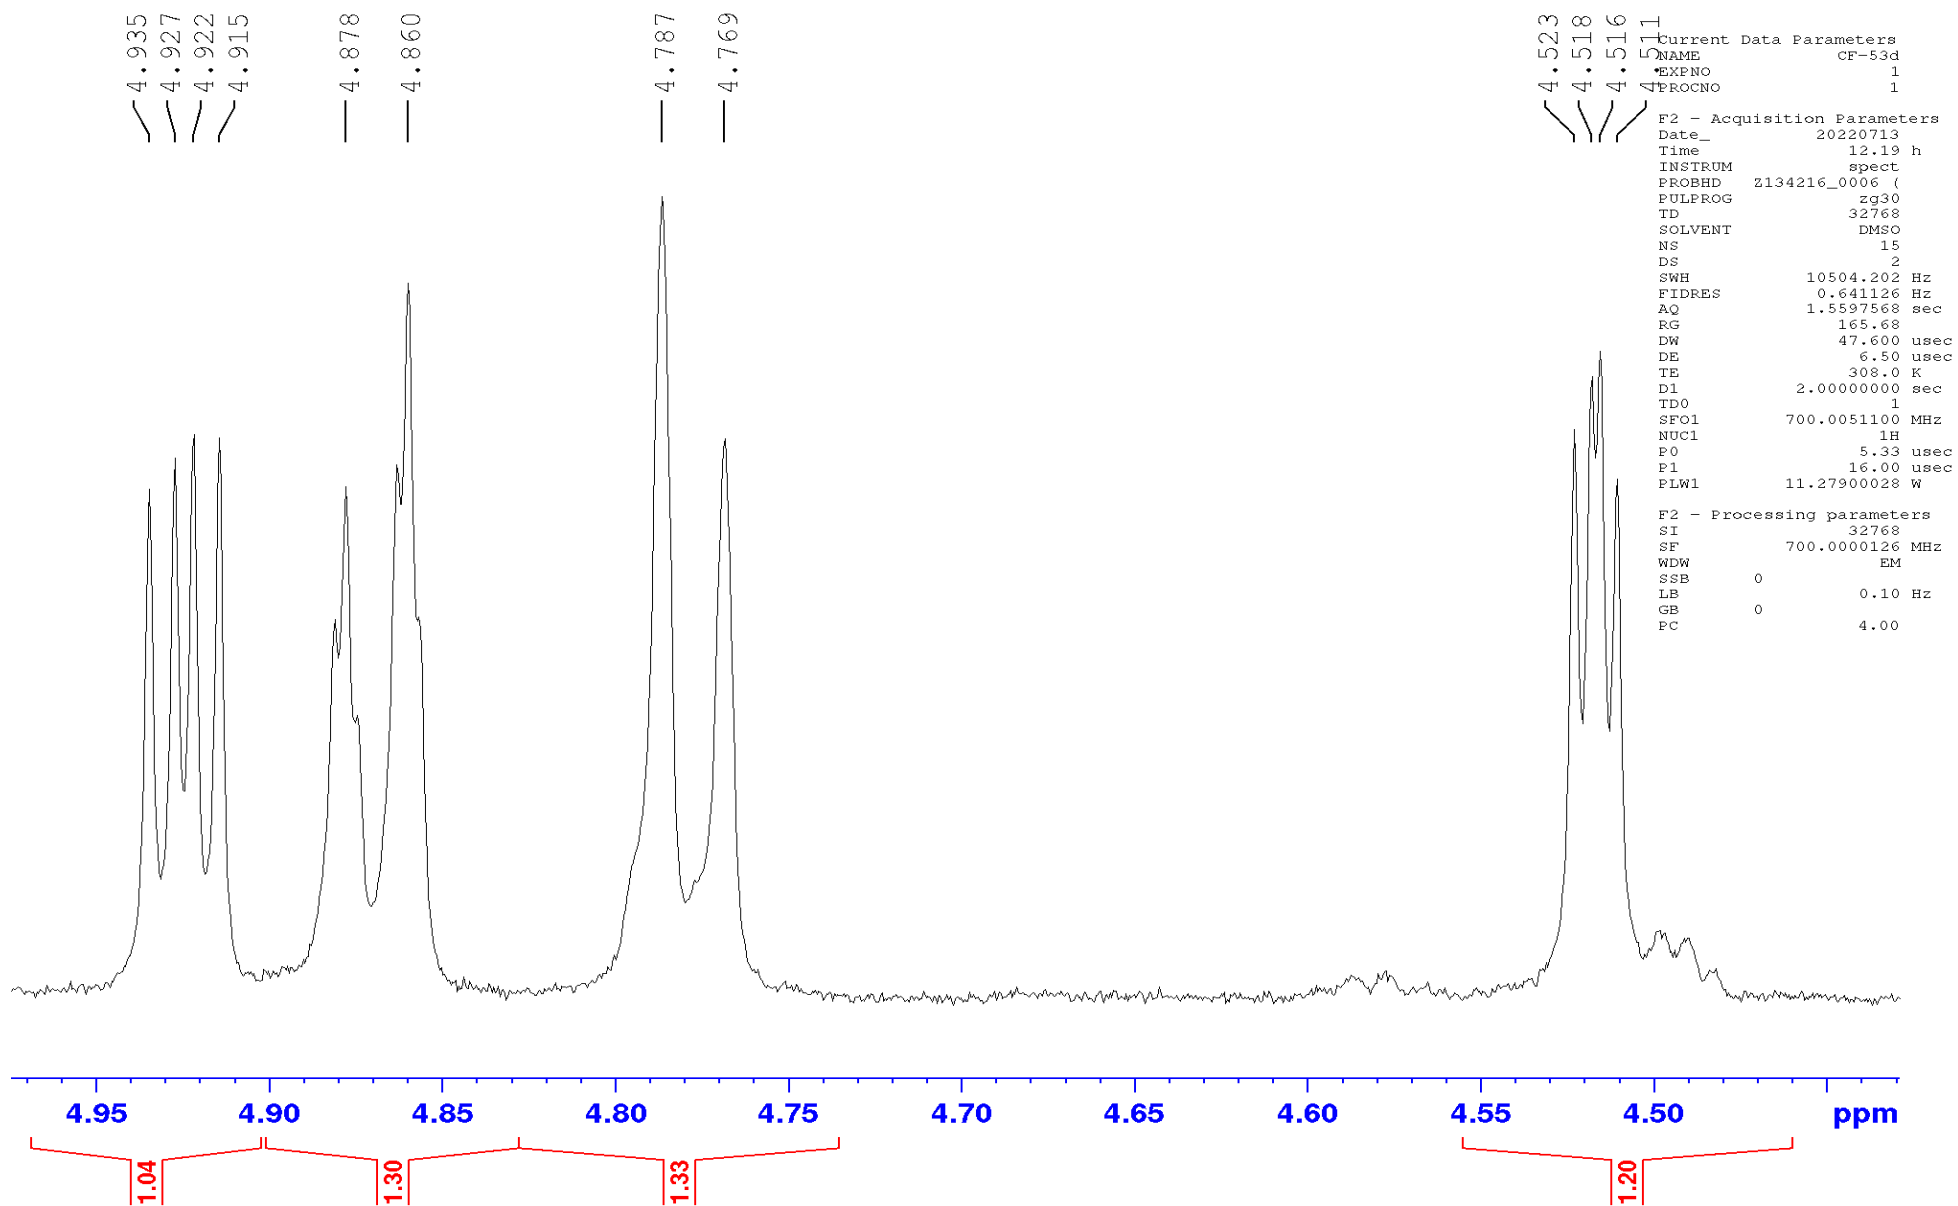

Expanded  $^1\text{H}$  NMR spectrum (700 MHz,  $\text{DMSO-d}_6$ ) of **11**

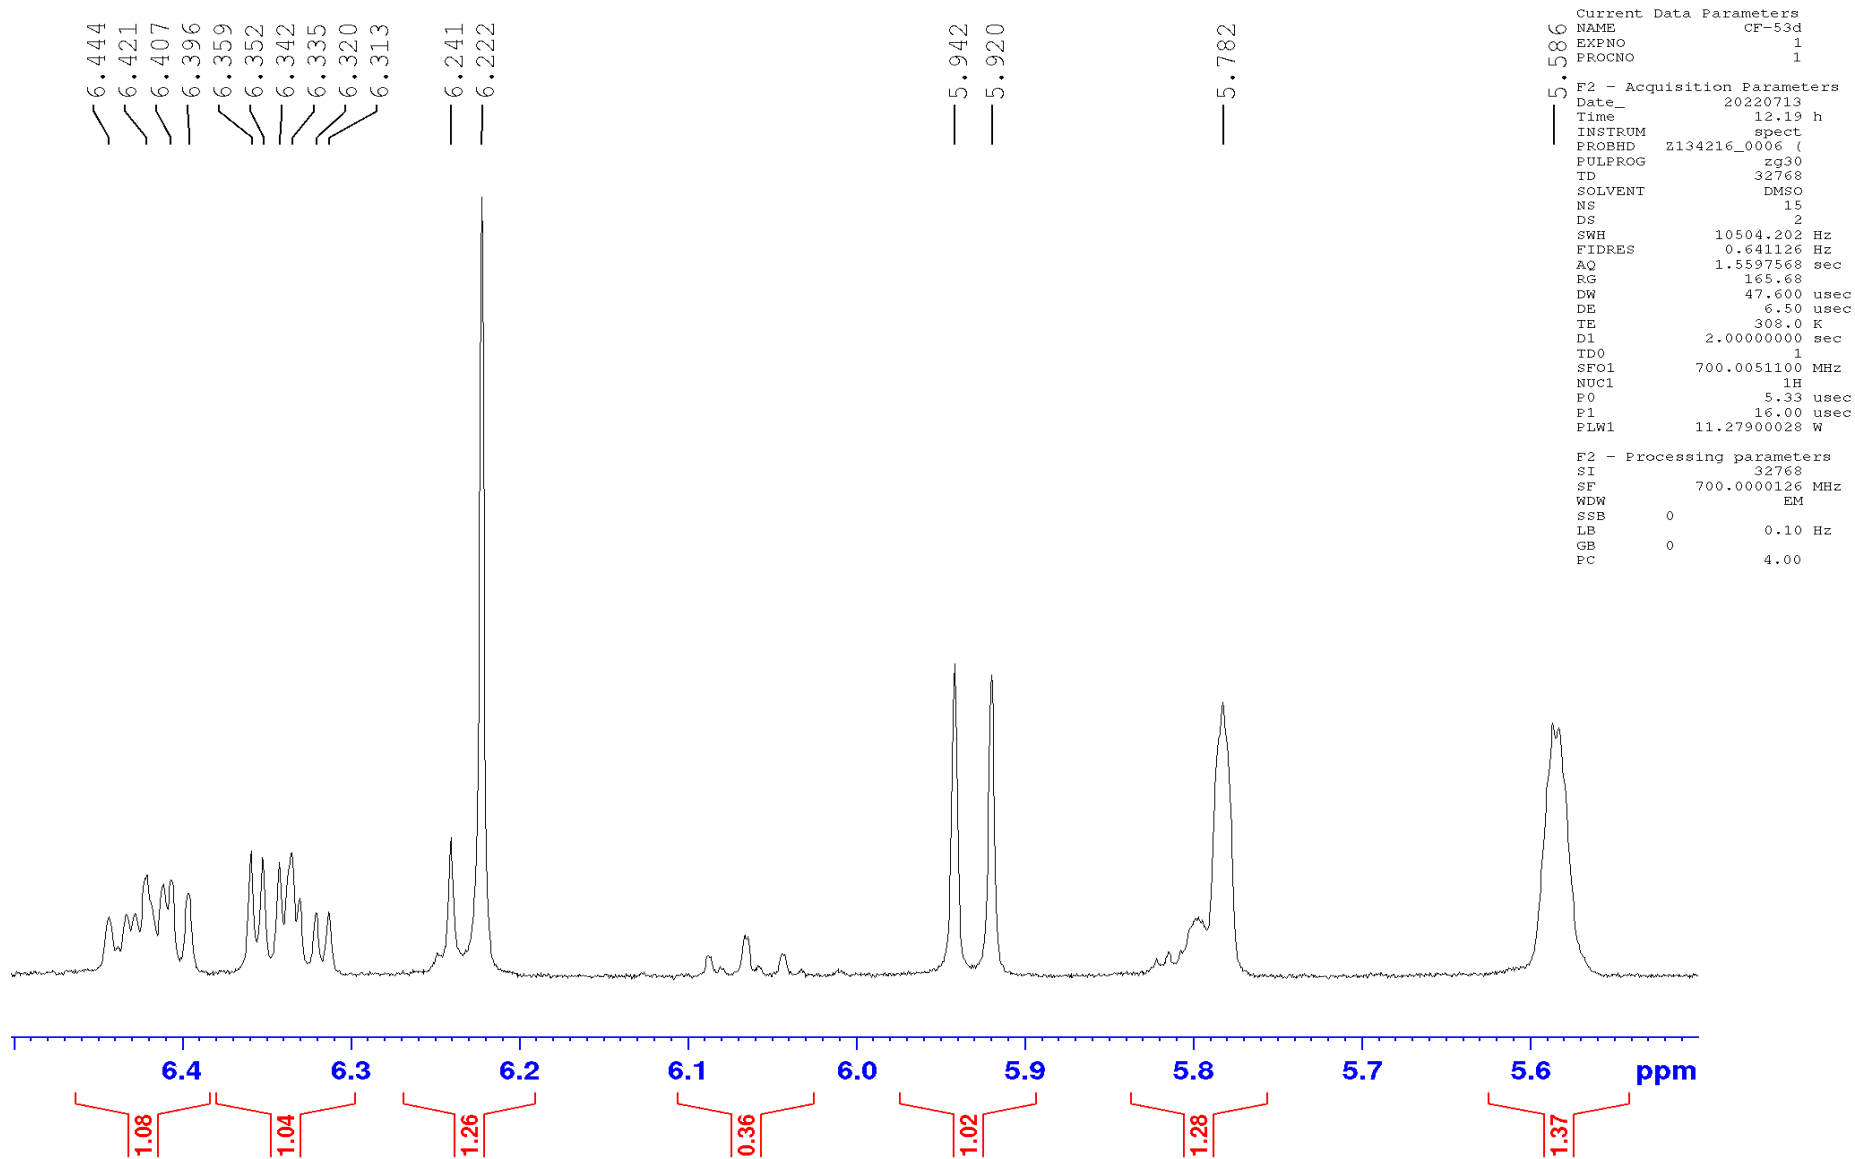

Expanded  $^1\text{H}$  NMR spectrum (700 MHz,  $\text{DMSO-d}_6$ ) of **11**

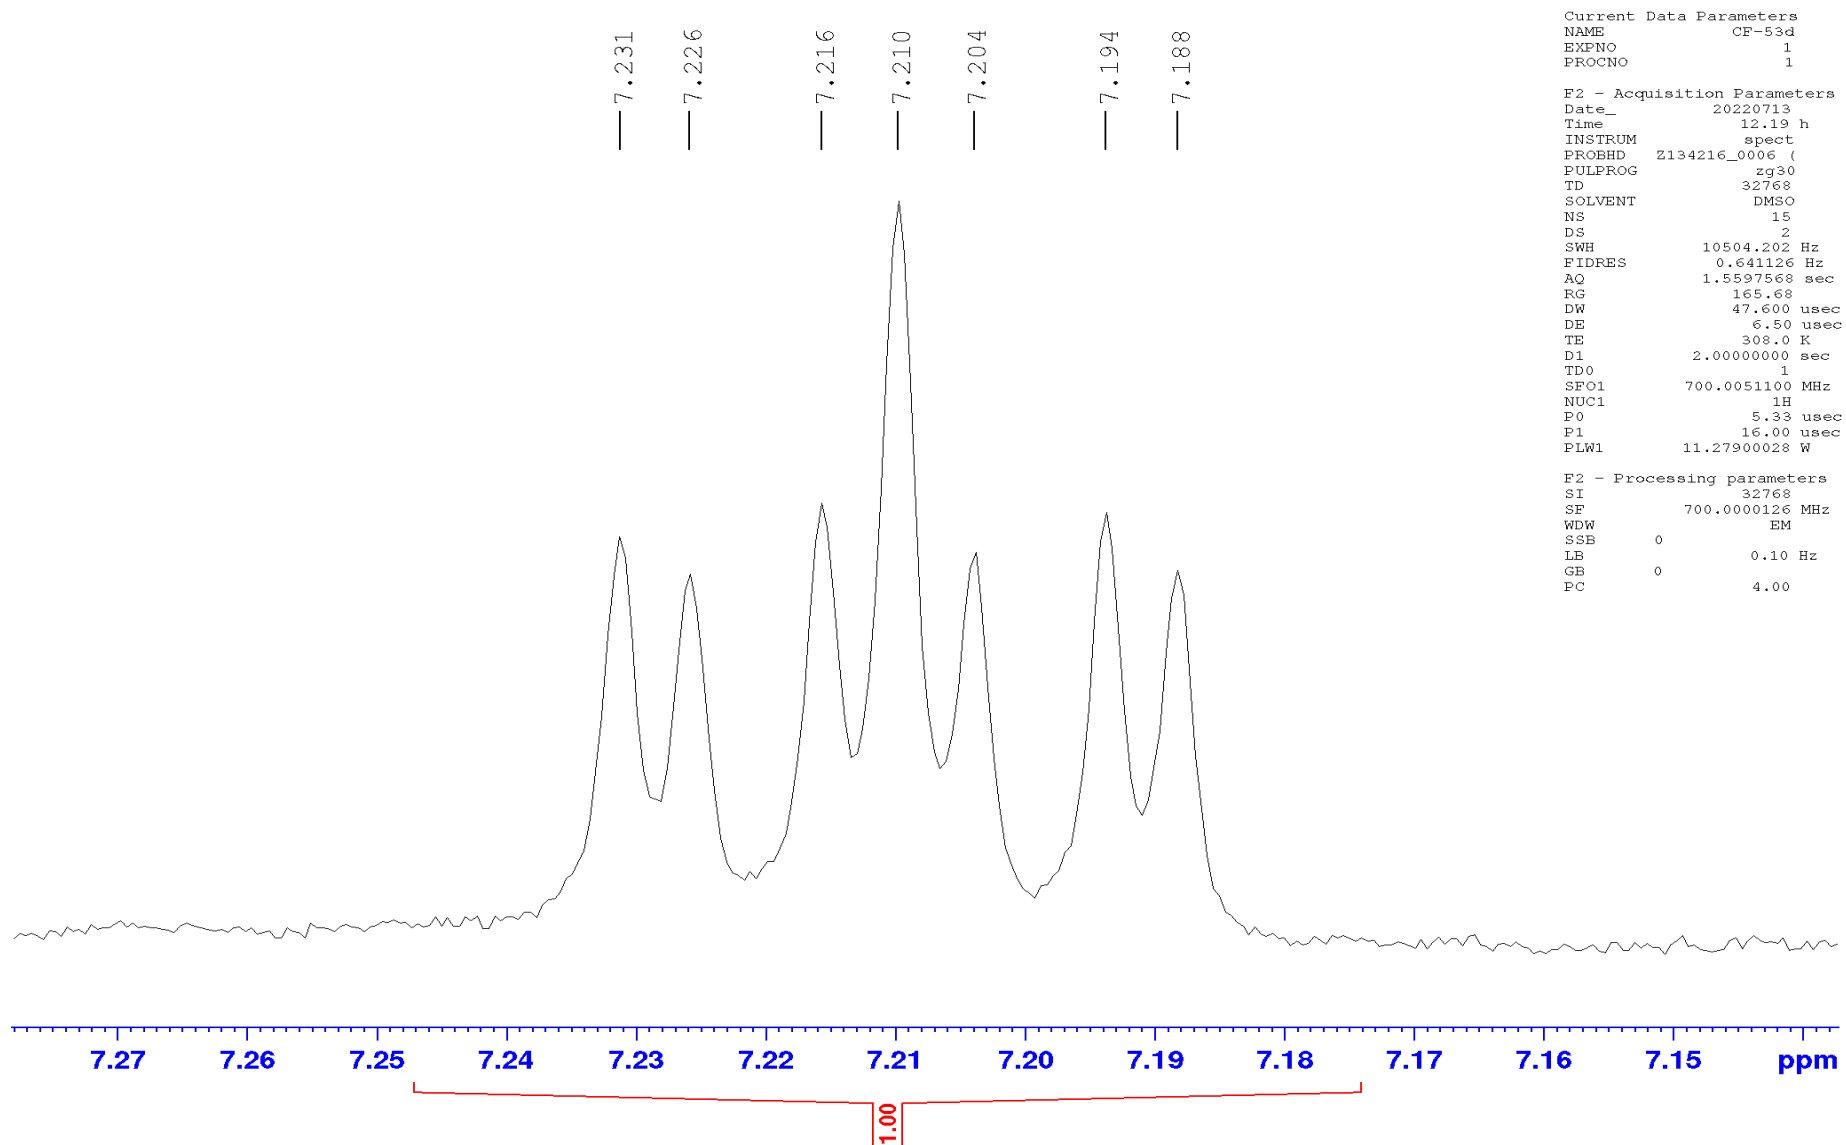

Expanded  $^1\text{H}$  NMR spectrum (700 MHz,  $\text{DMSO-d}_6$ ) of **11**

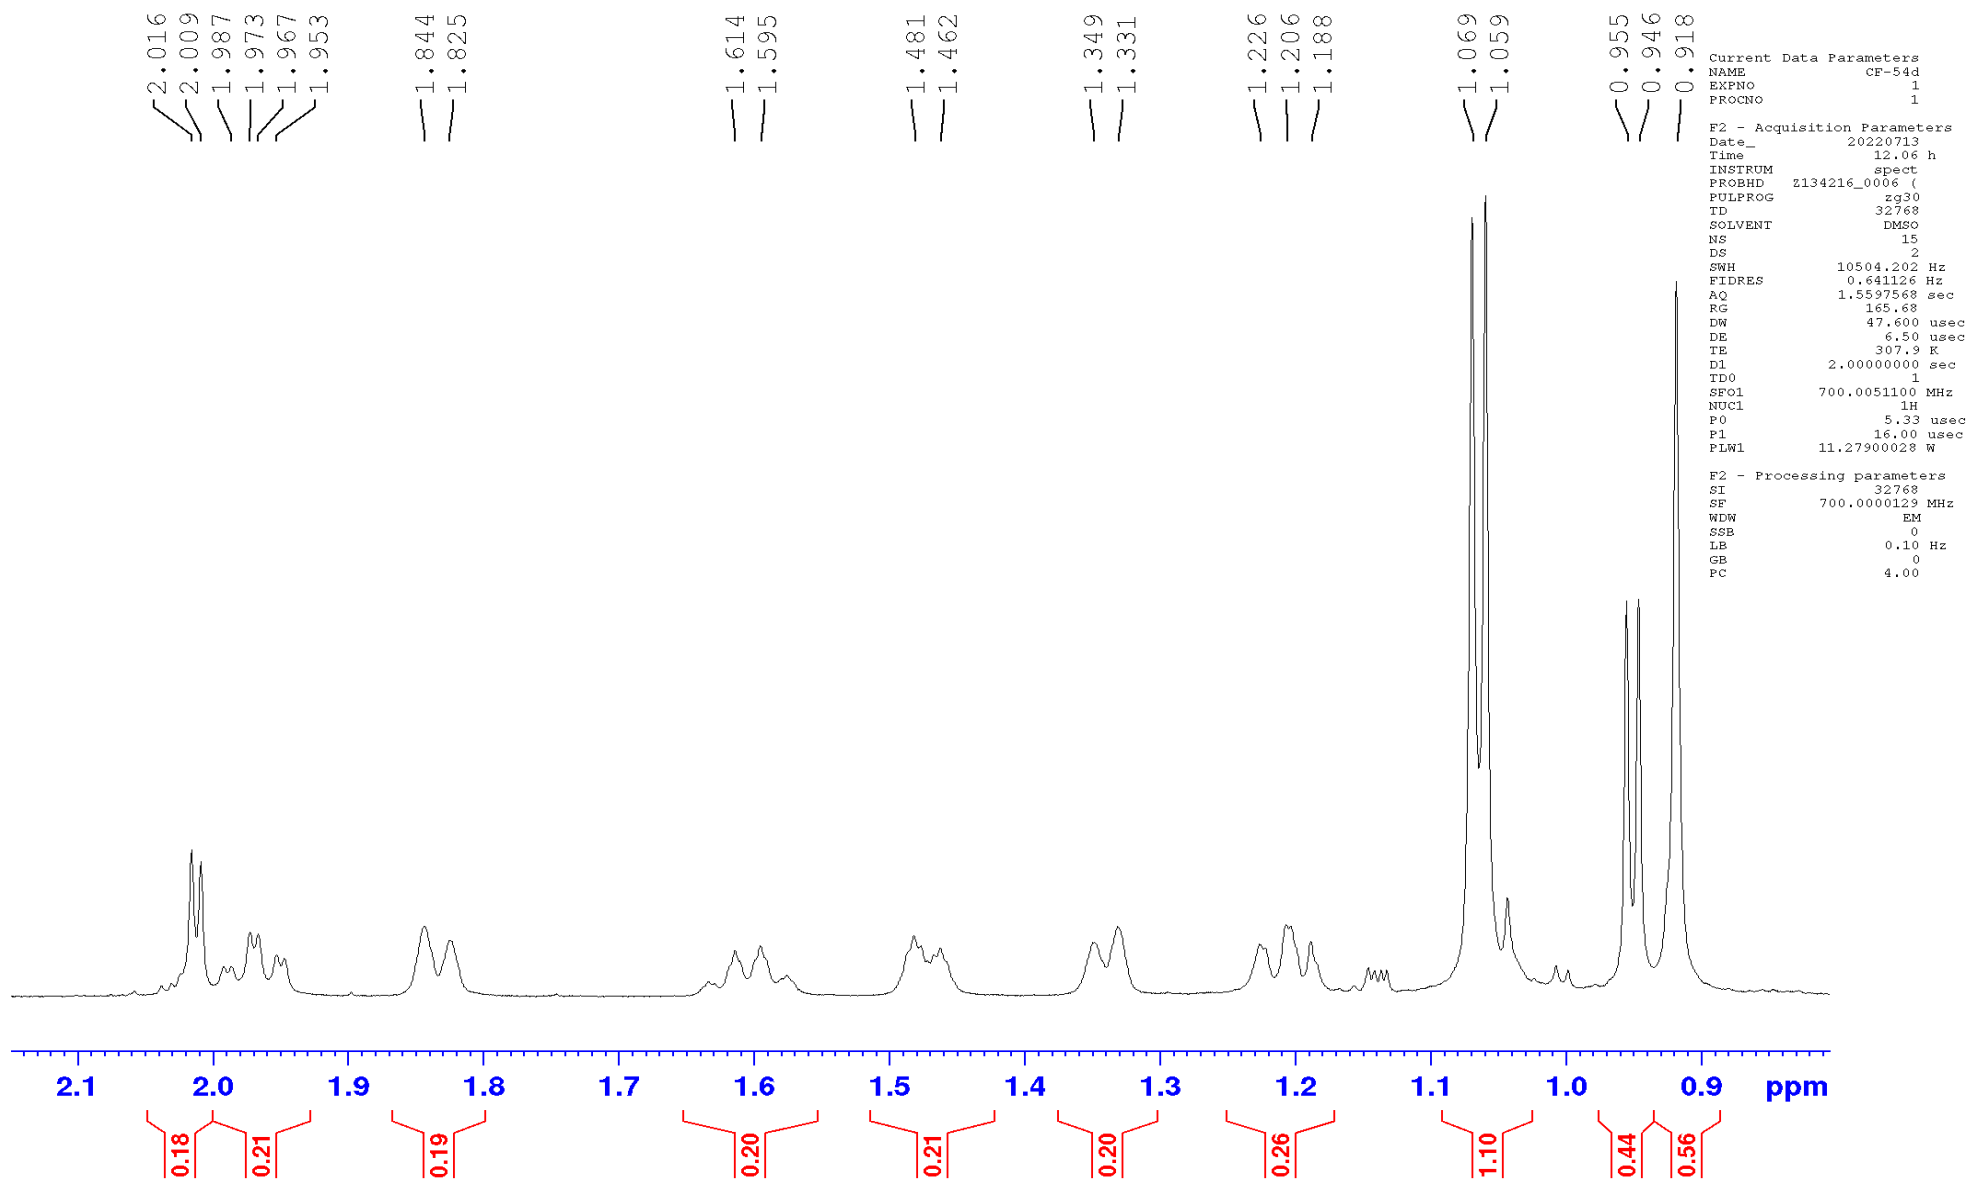

Figure S51. Expanded  $^1\text{H}$  NMR spectrum (700 MHz,  $\text{DMSO-d}_6$ ) of **12**

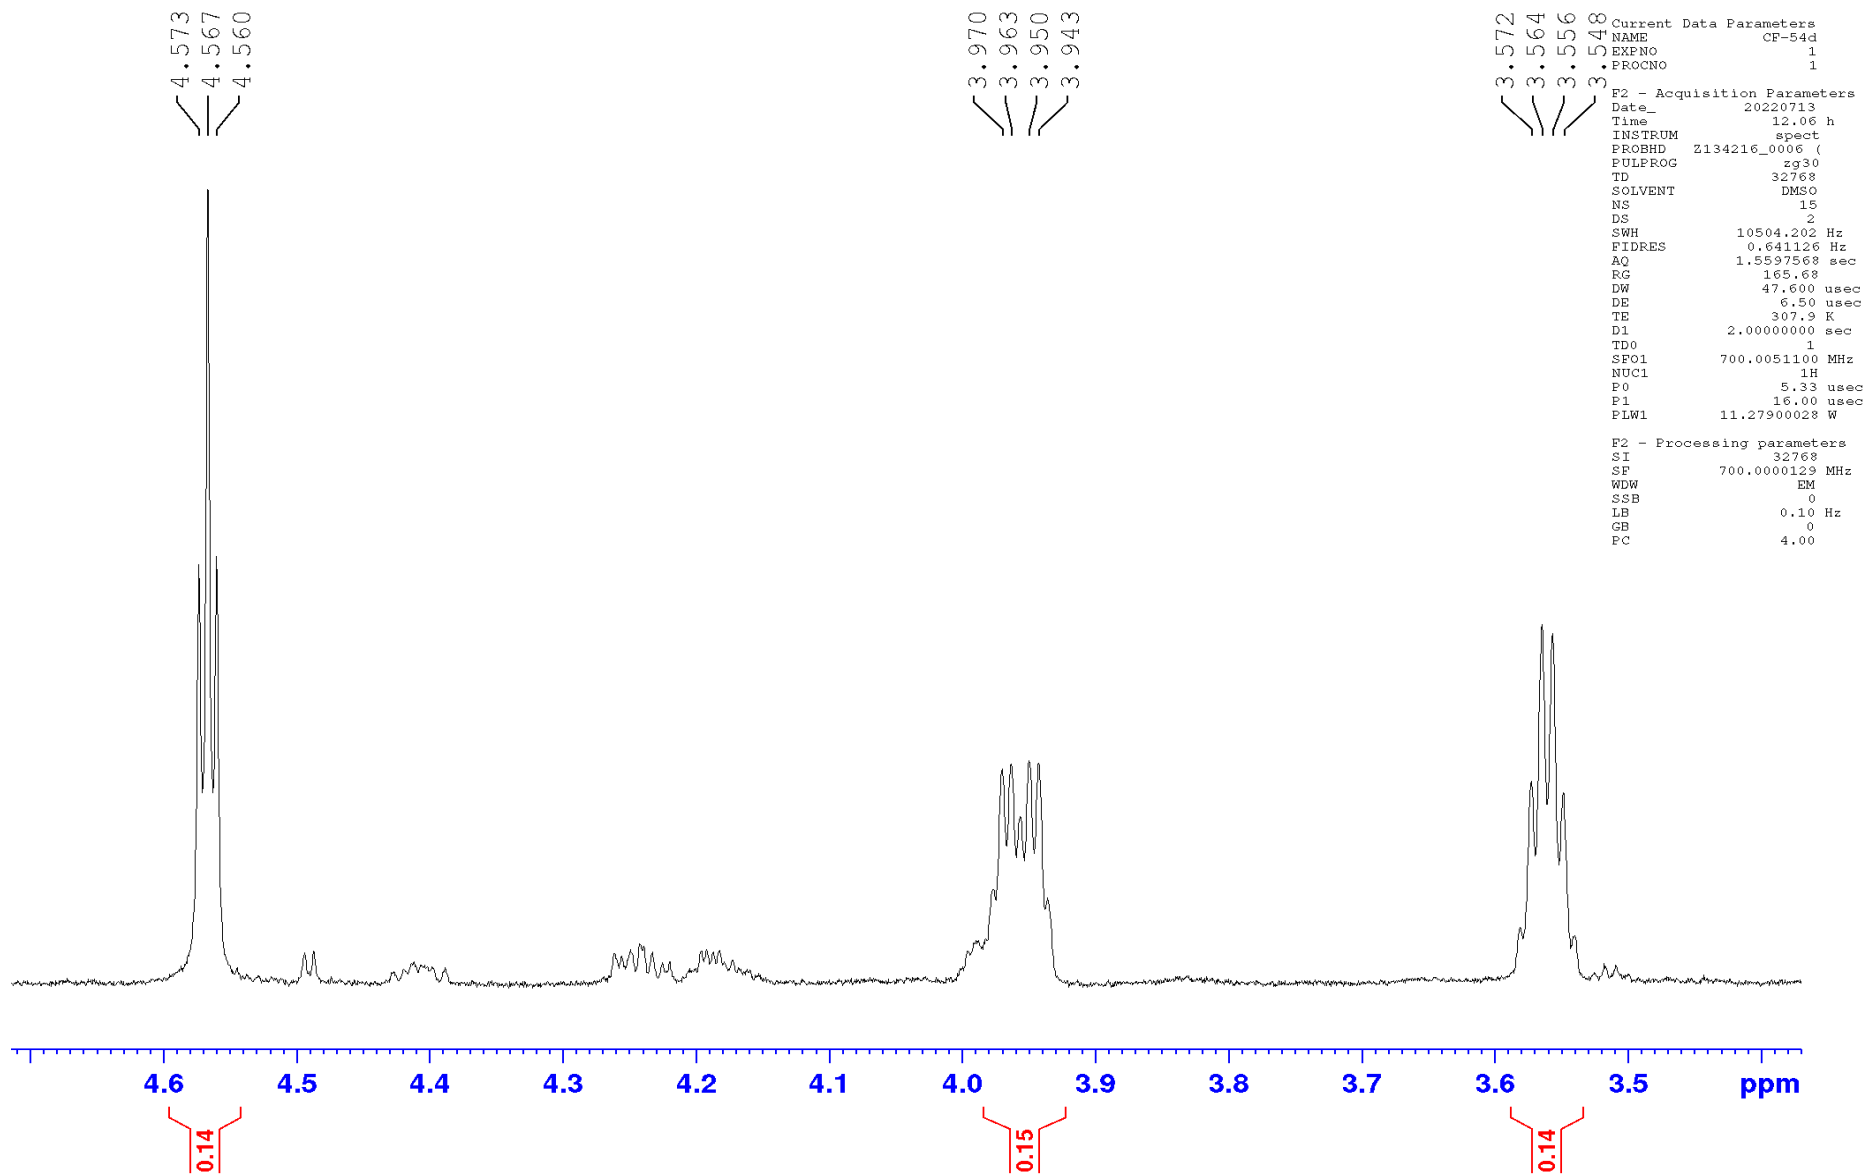

Expanded  $^1\text{H}$  NMR spectrum (700 MHz, DMSO- $\text{d}_6$ ) of **12**

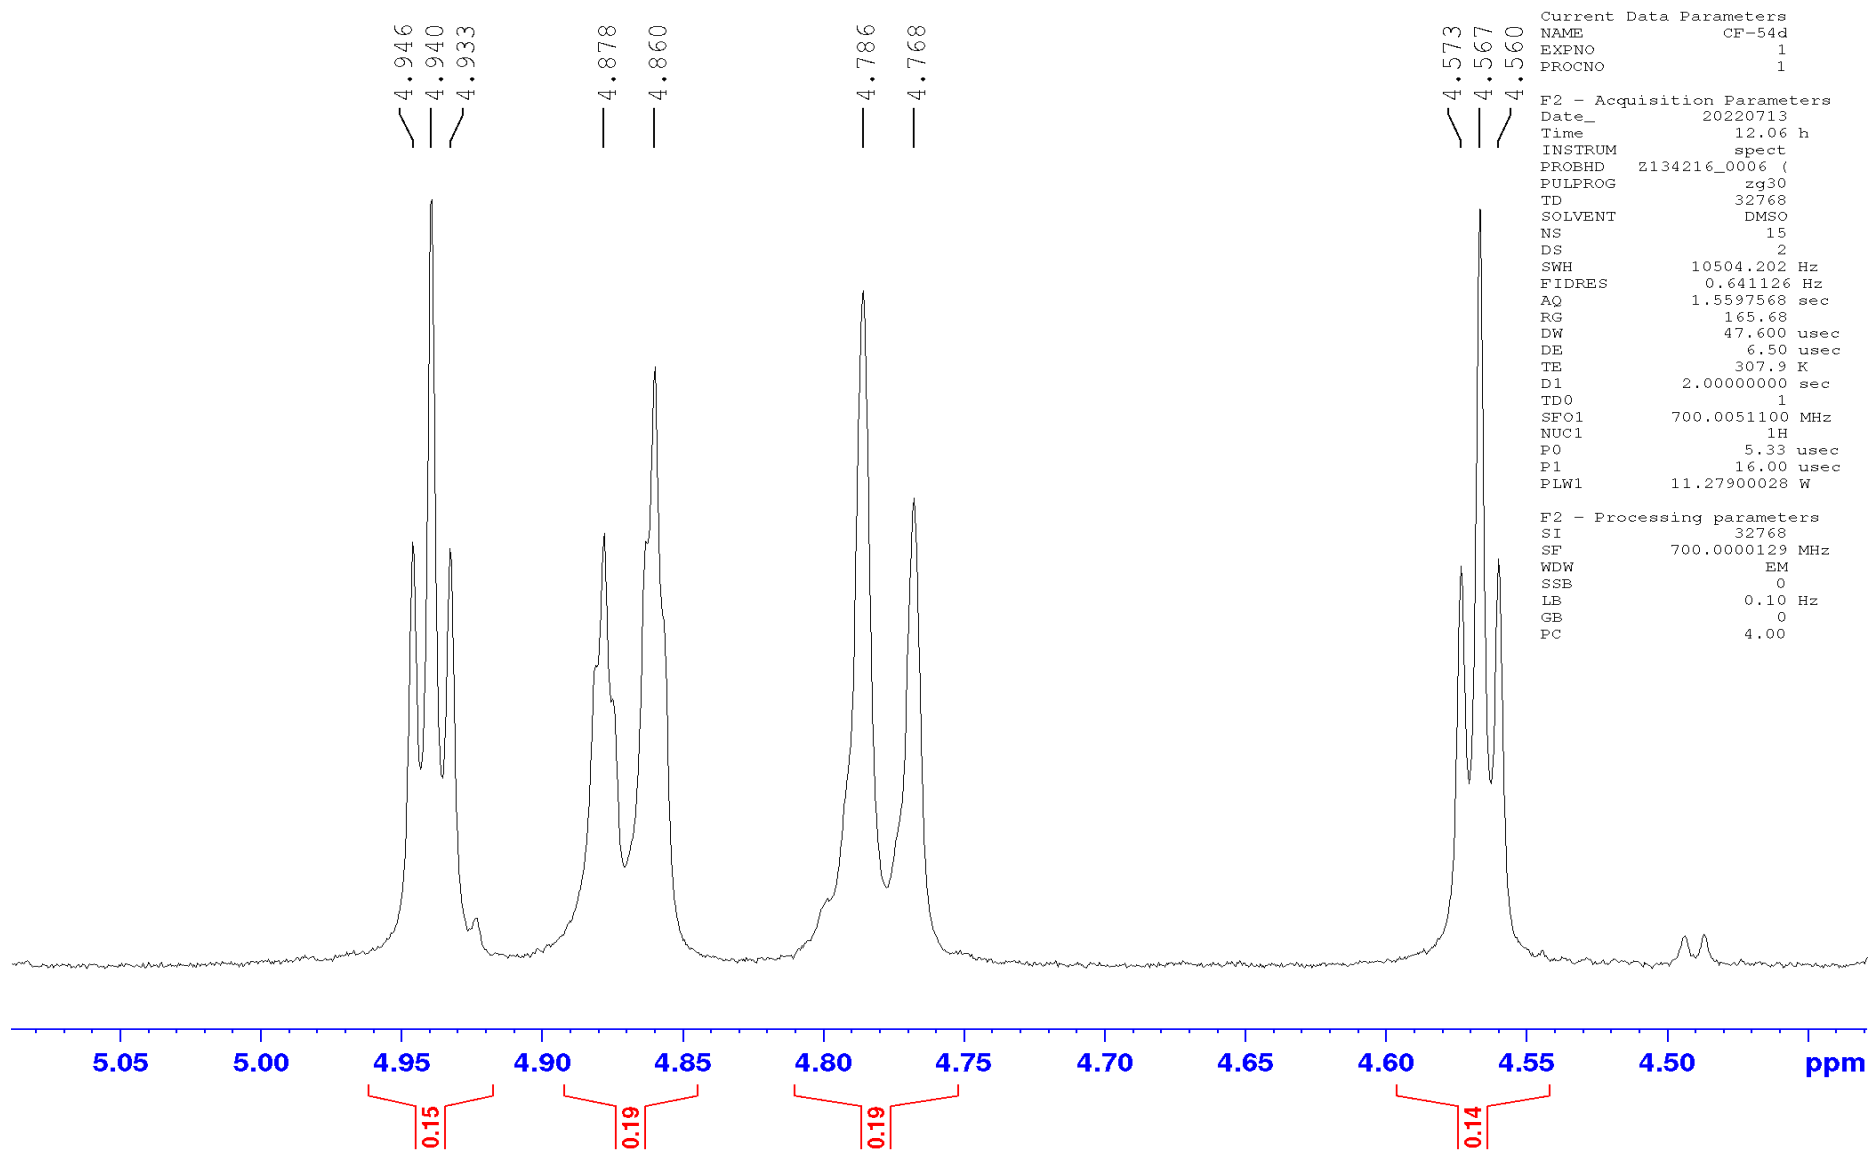

Expanded  $^1\text{H}$  NMR spectrum (700 MHz,  $\text{DMSO-d}_6$ ) of **12**

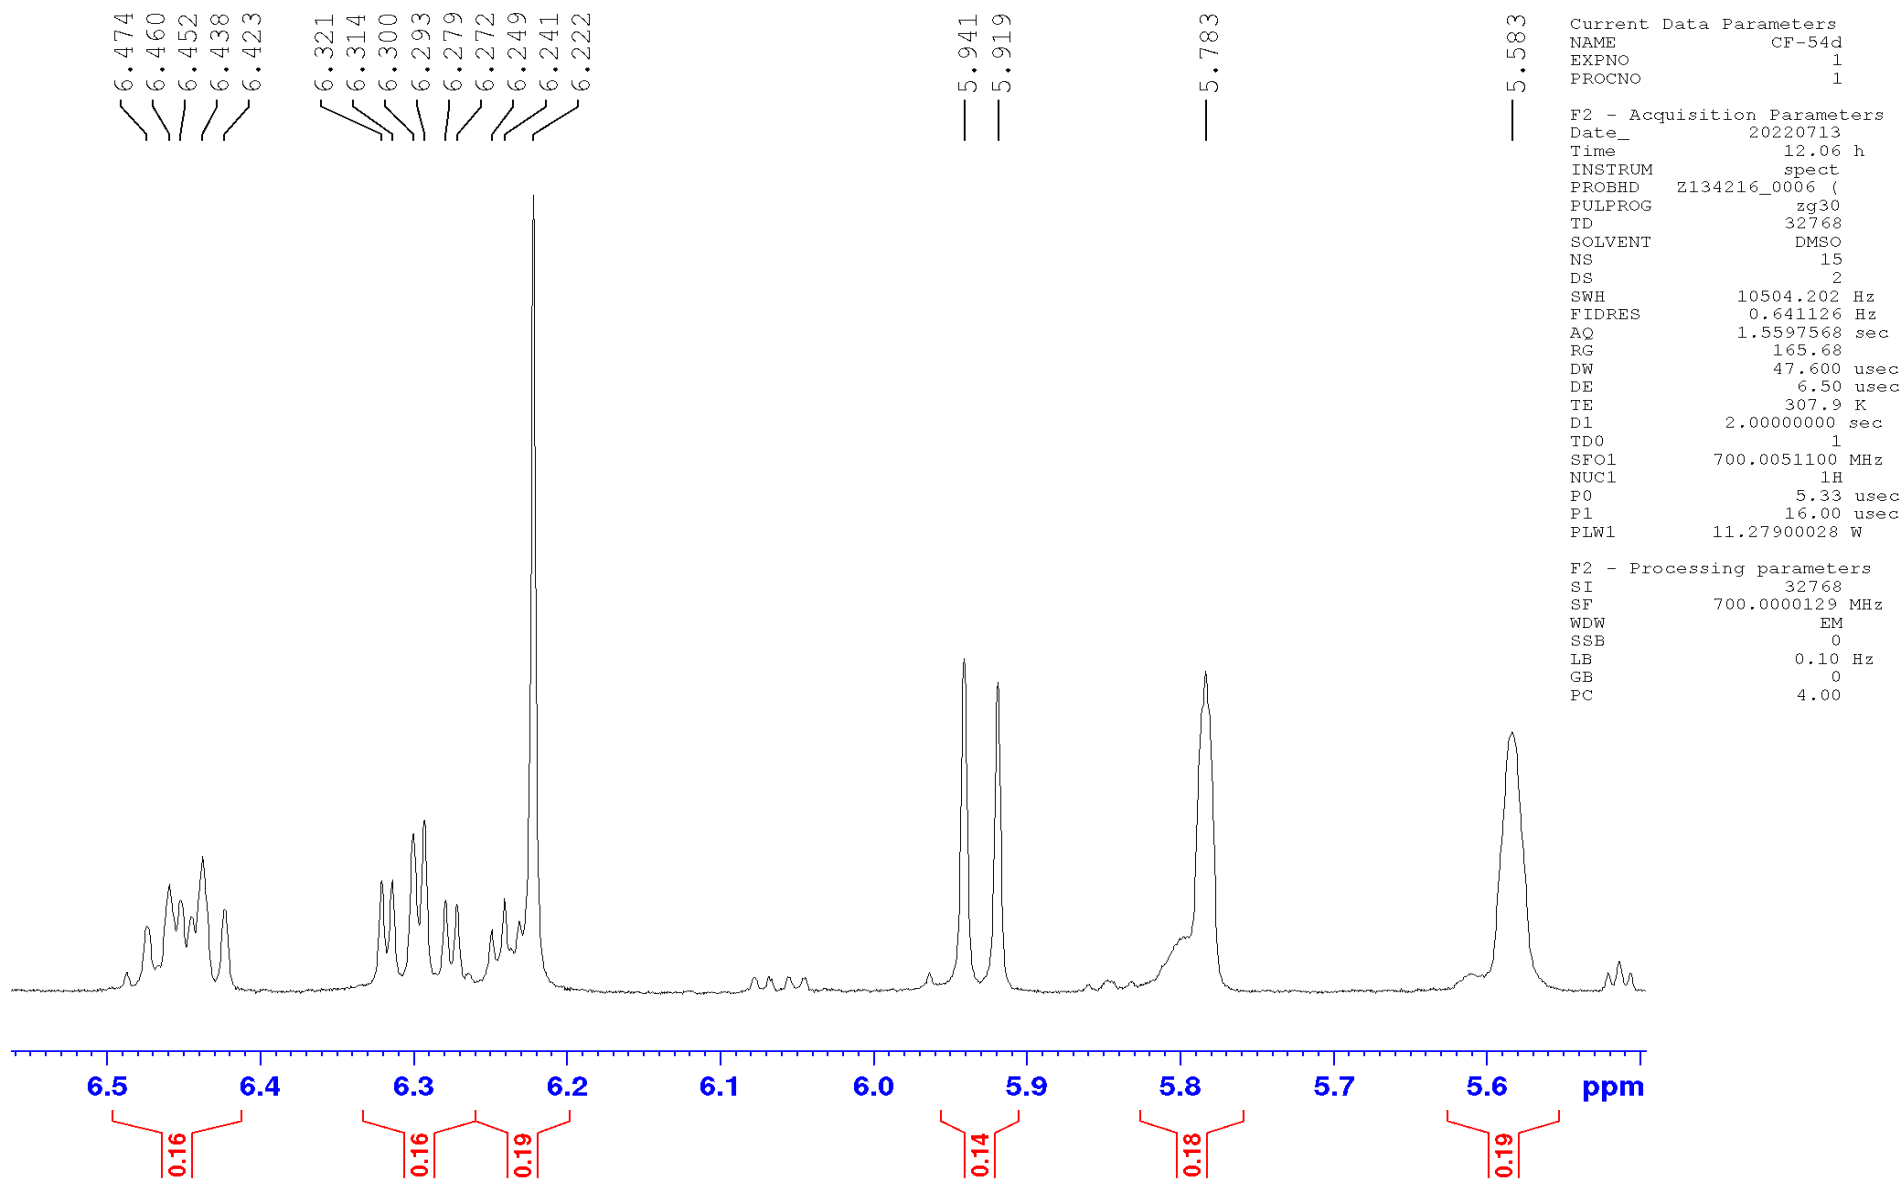

Expanded  $^1\text{H}$  NMR spectrum (700 MHz,  $\text{DMSO-d}_6$ ) of **12**

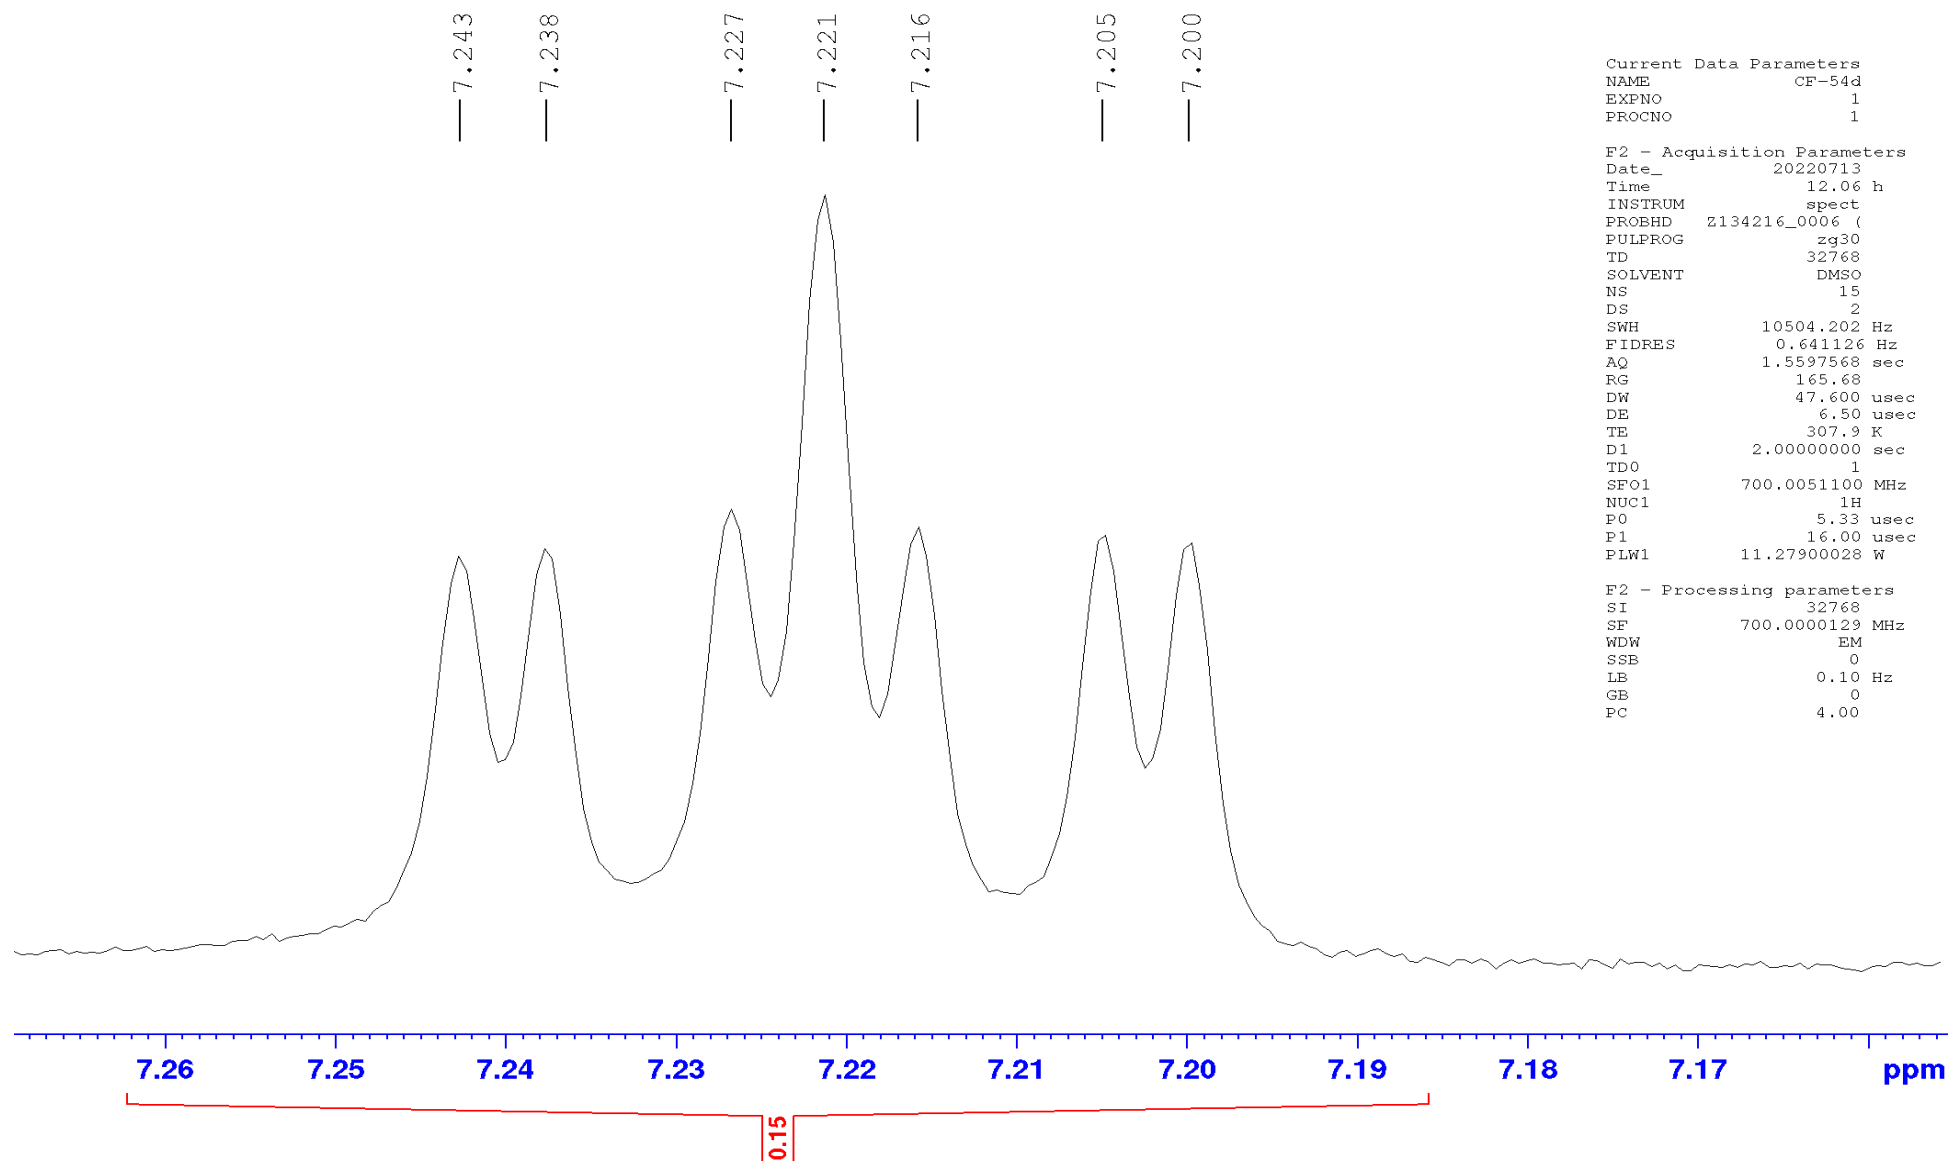

Expanded  $^1\text{H}$  NMR spectrum (700 MHz,  $\text{DMSO-d}_6$ ) of **12**

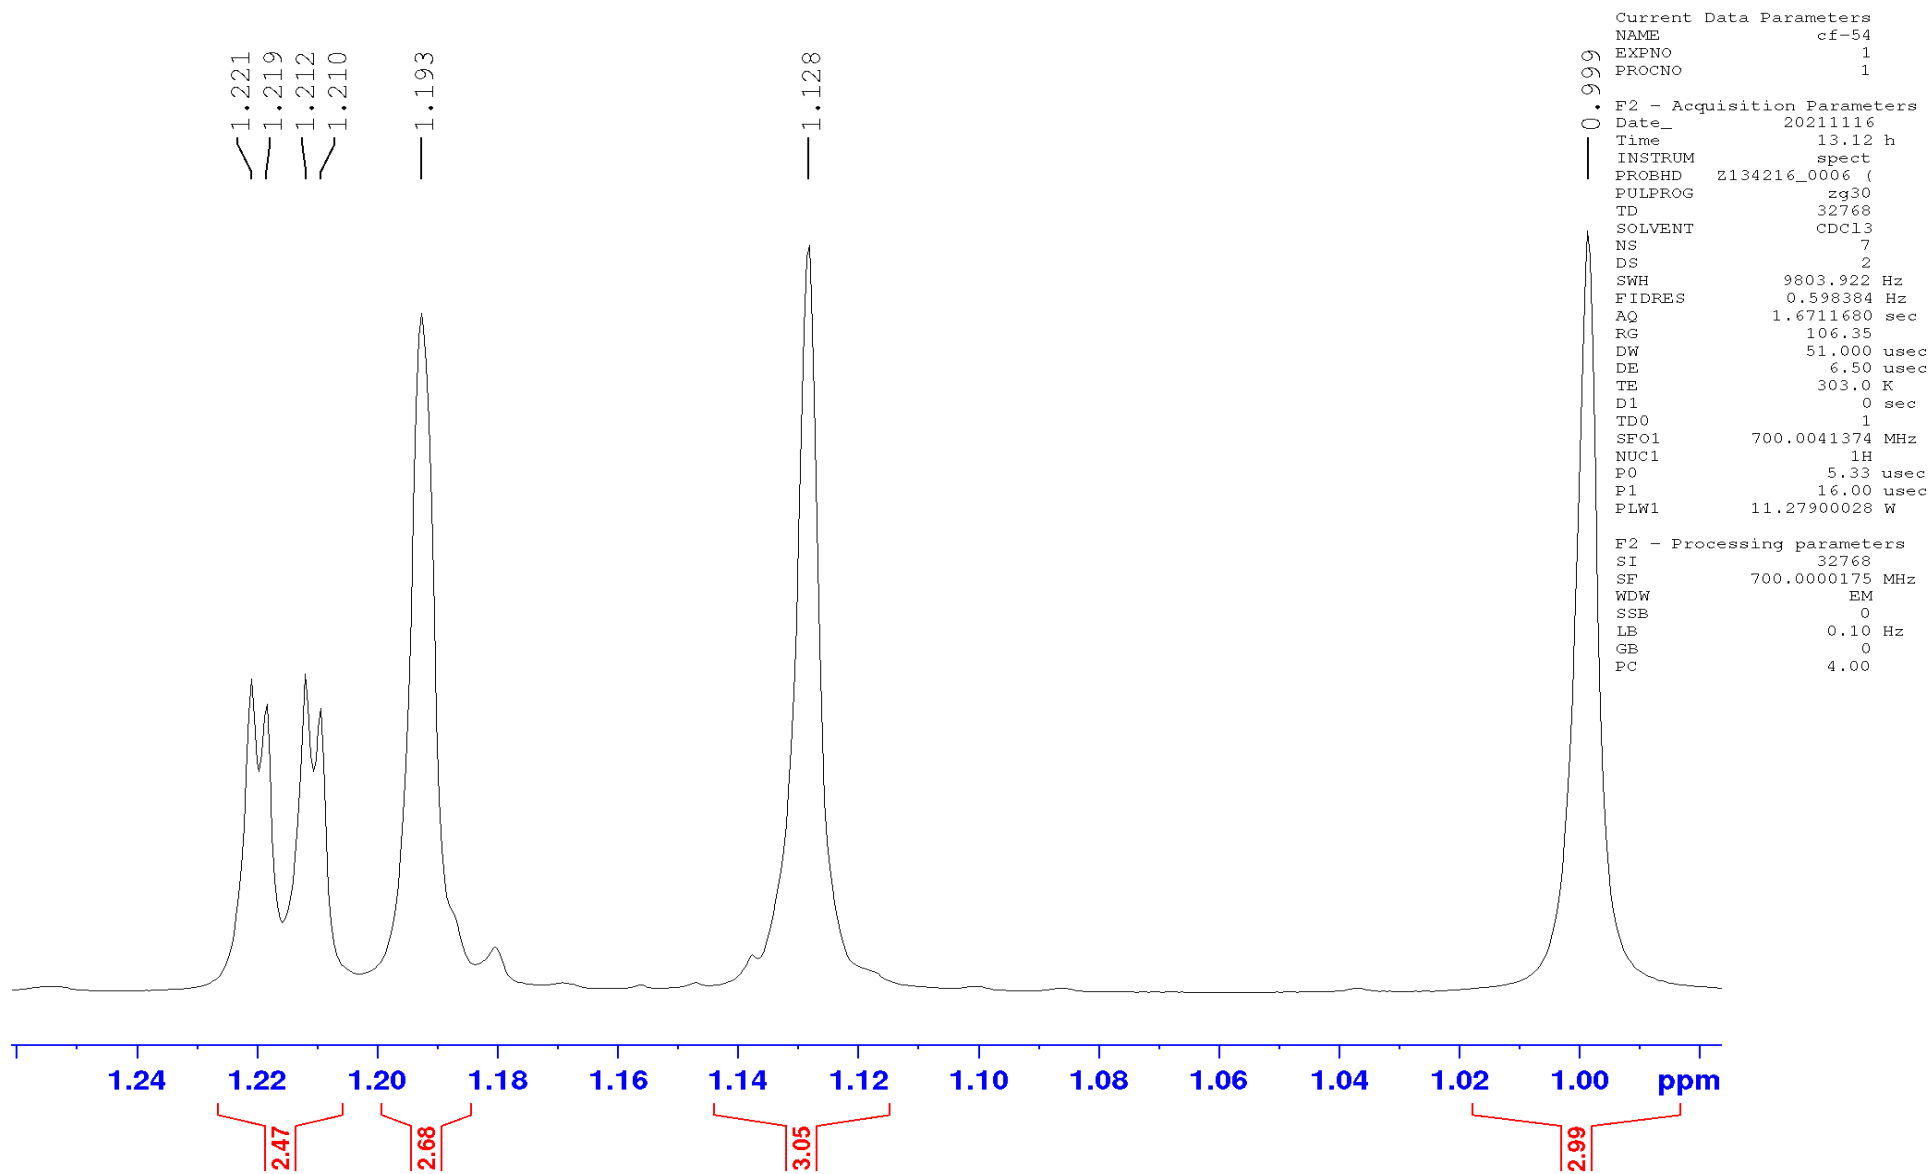

Figure S52. Expanded  $^1\text{H}$  NMR spectrum (700 MHz,  $\text{CDCl}_3$ ) of **12**

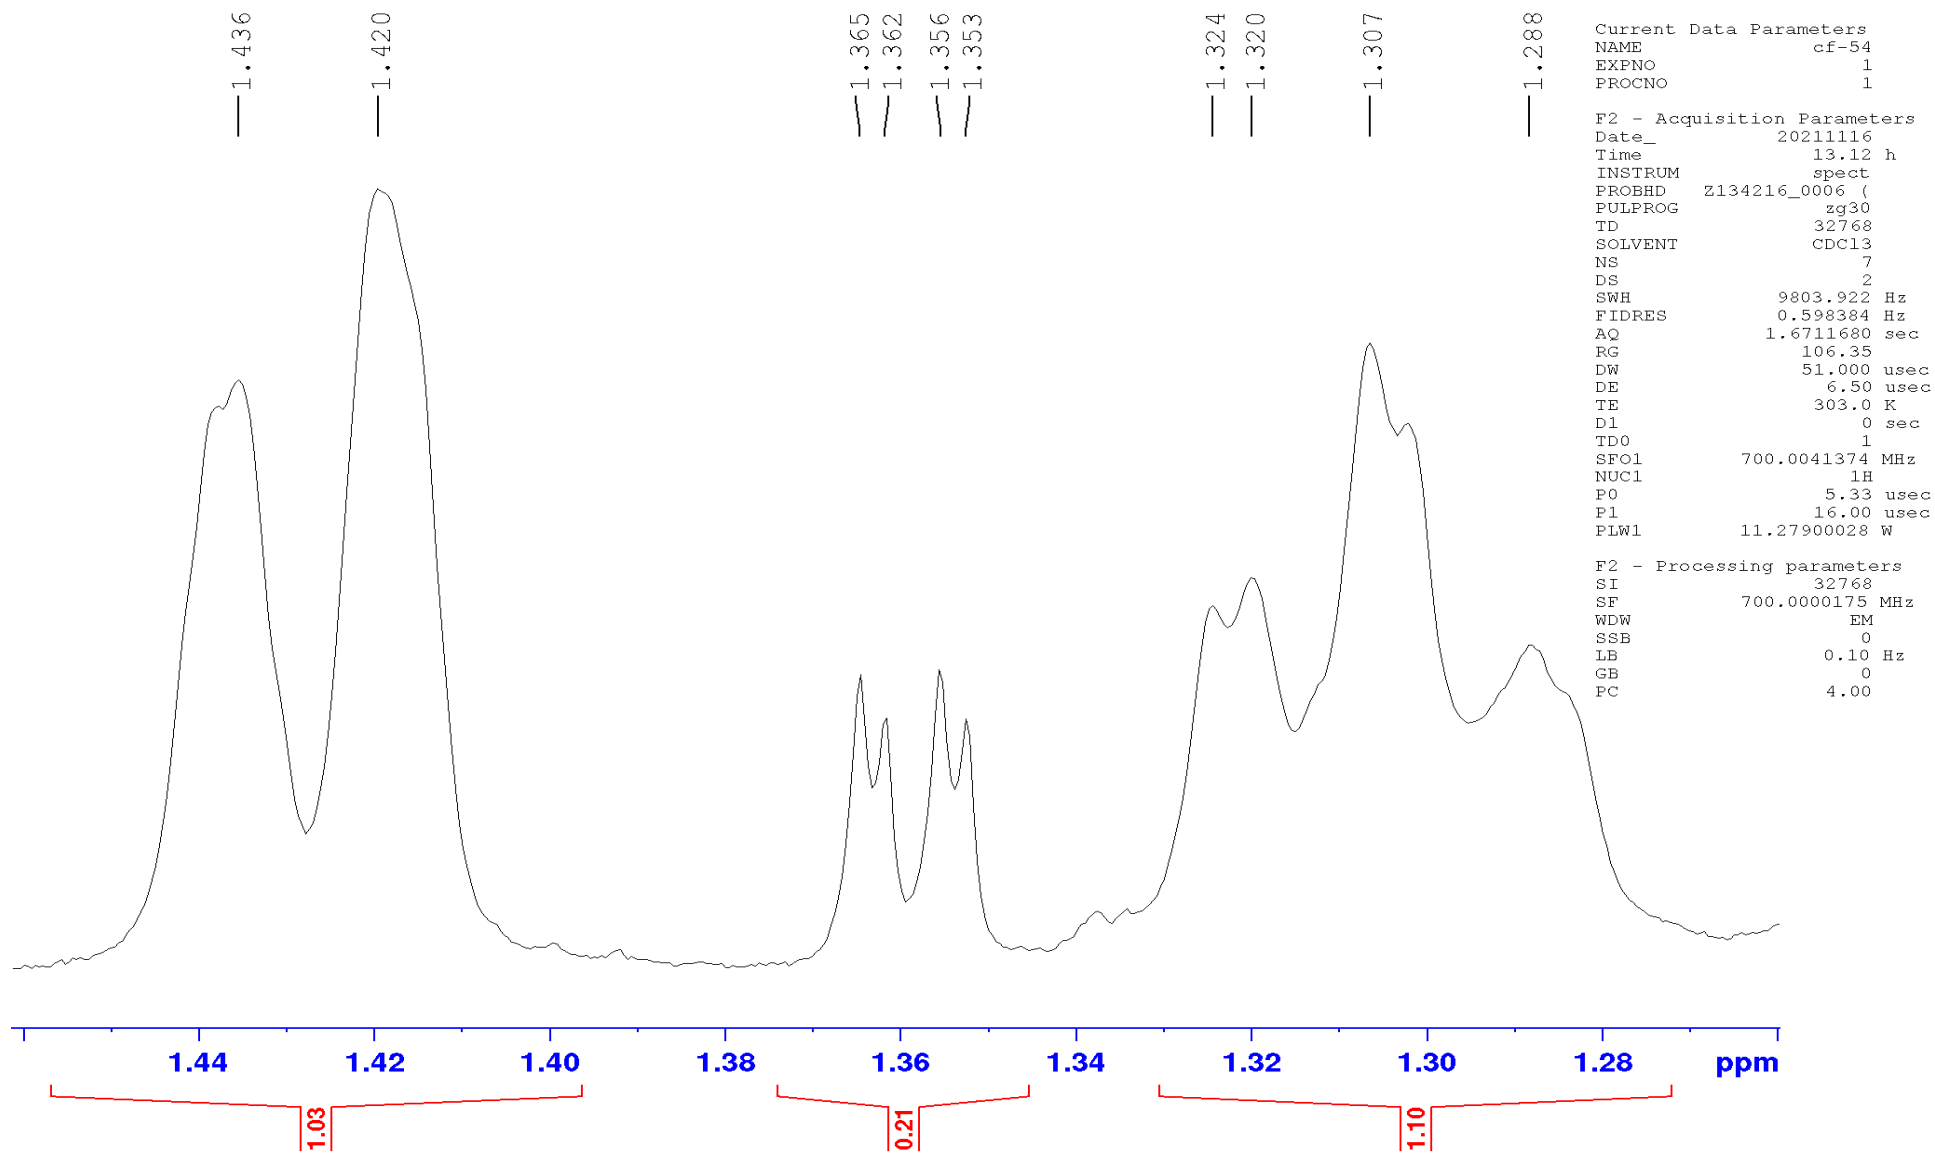

Expanded  $^1\text{H}$  NMR spectrum (700 MHz,  $\text{CDCl}_3$ ) of **12**

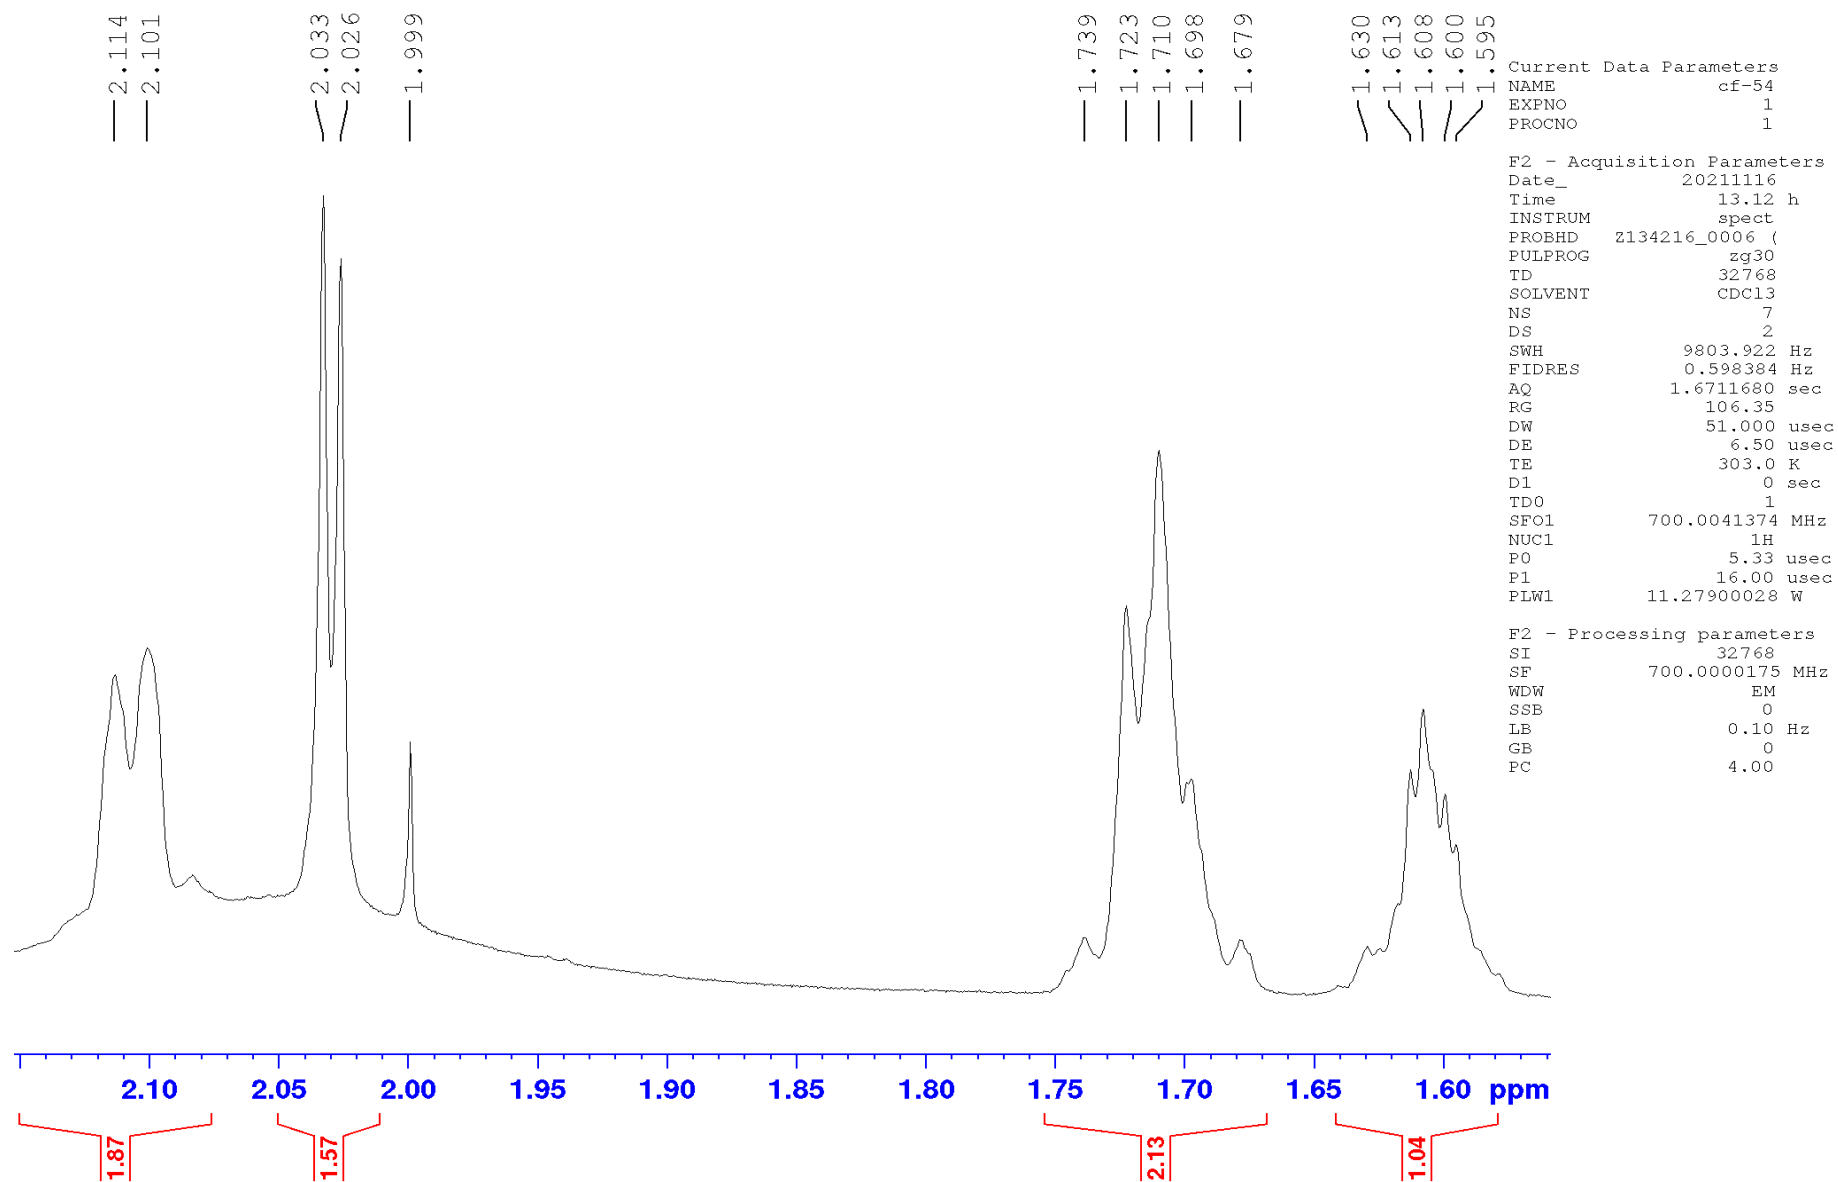

Expanded  $^1\text{H}$  NMR spectrum (700 MHz,  $\text{CDCl}_3$ ) of **12**

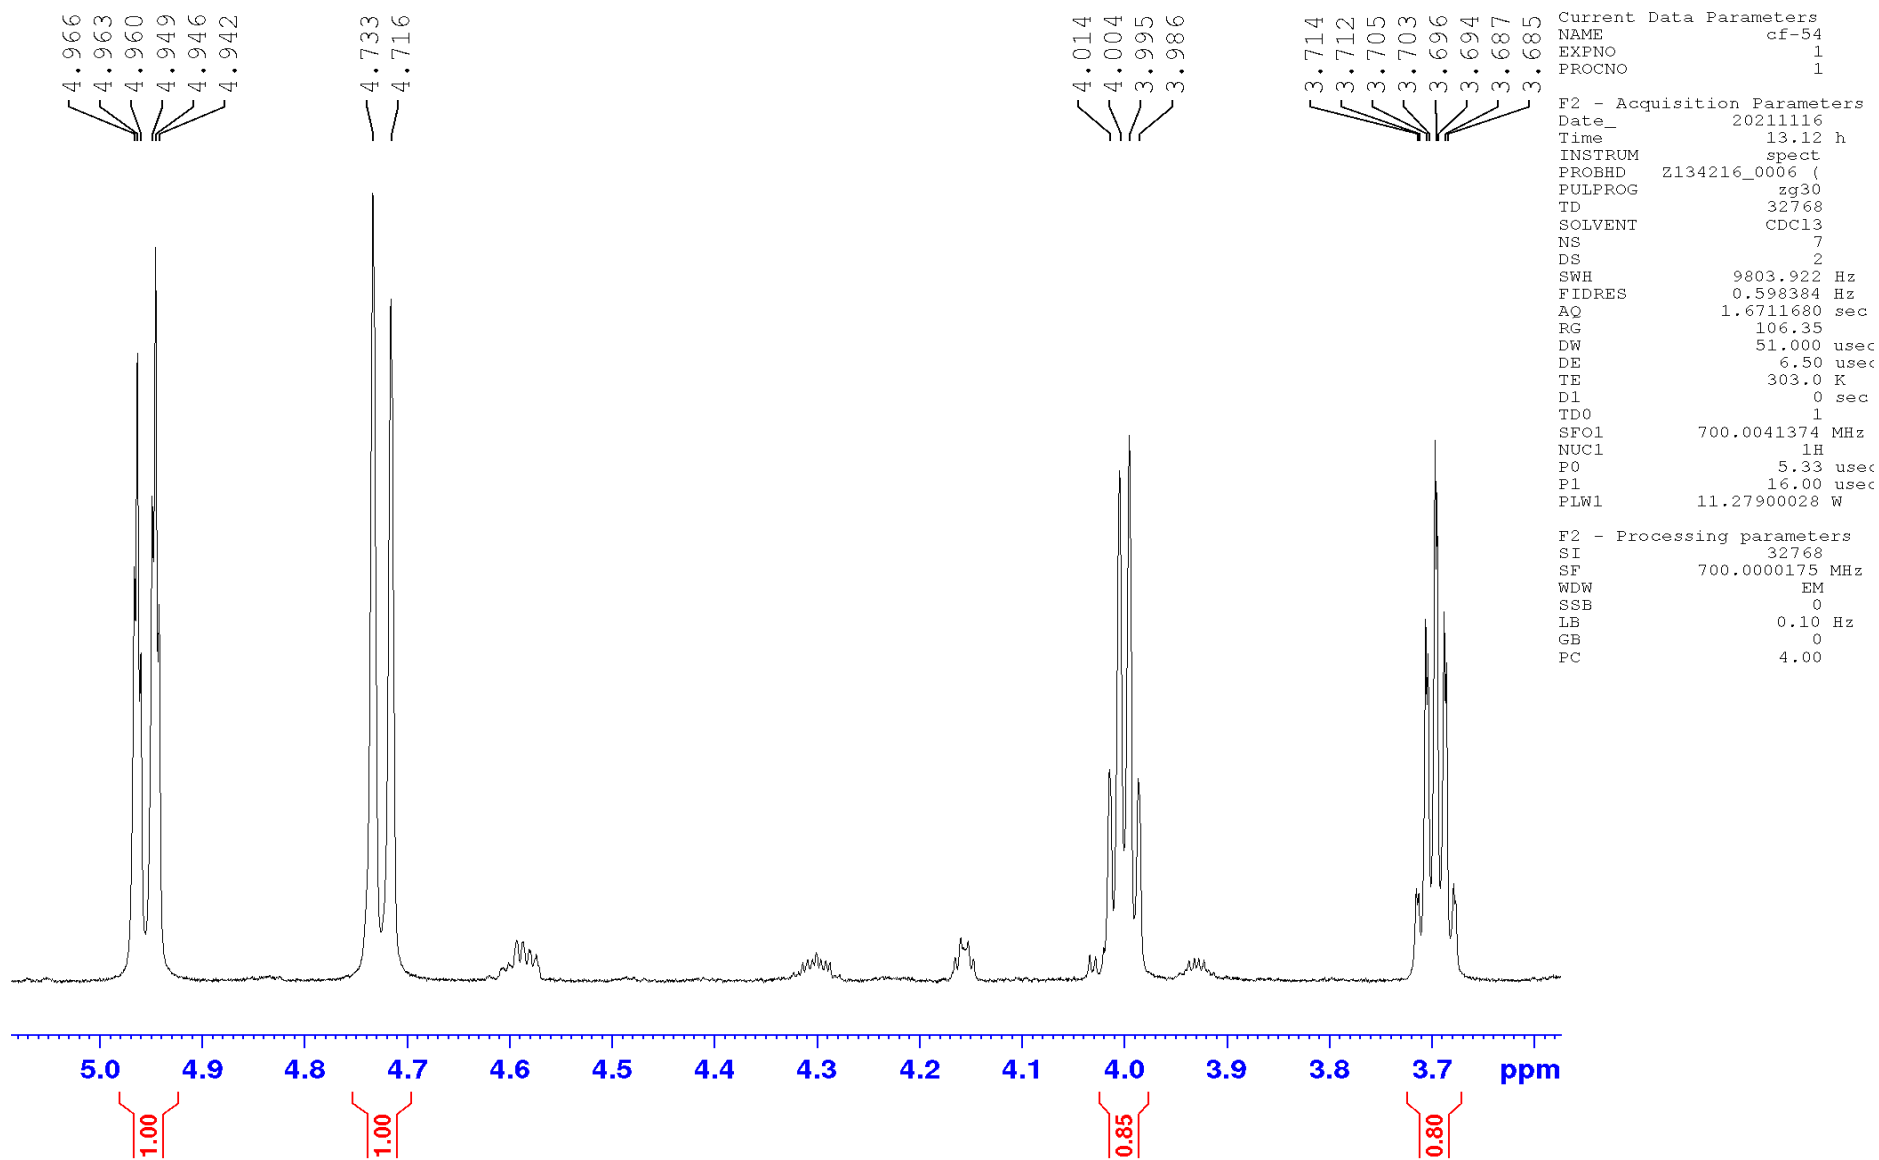

Expanded  $^1\text{H}$  NMR spectrum (700 MHz,  $\text{CDCl}_3$ ) of **12**

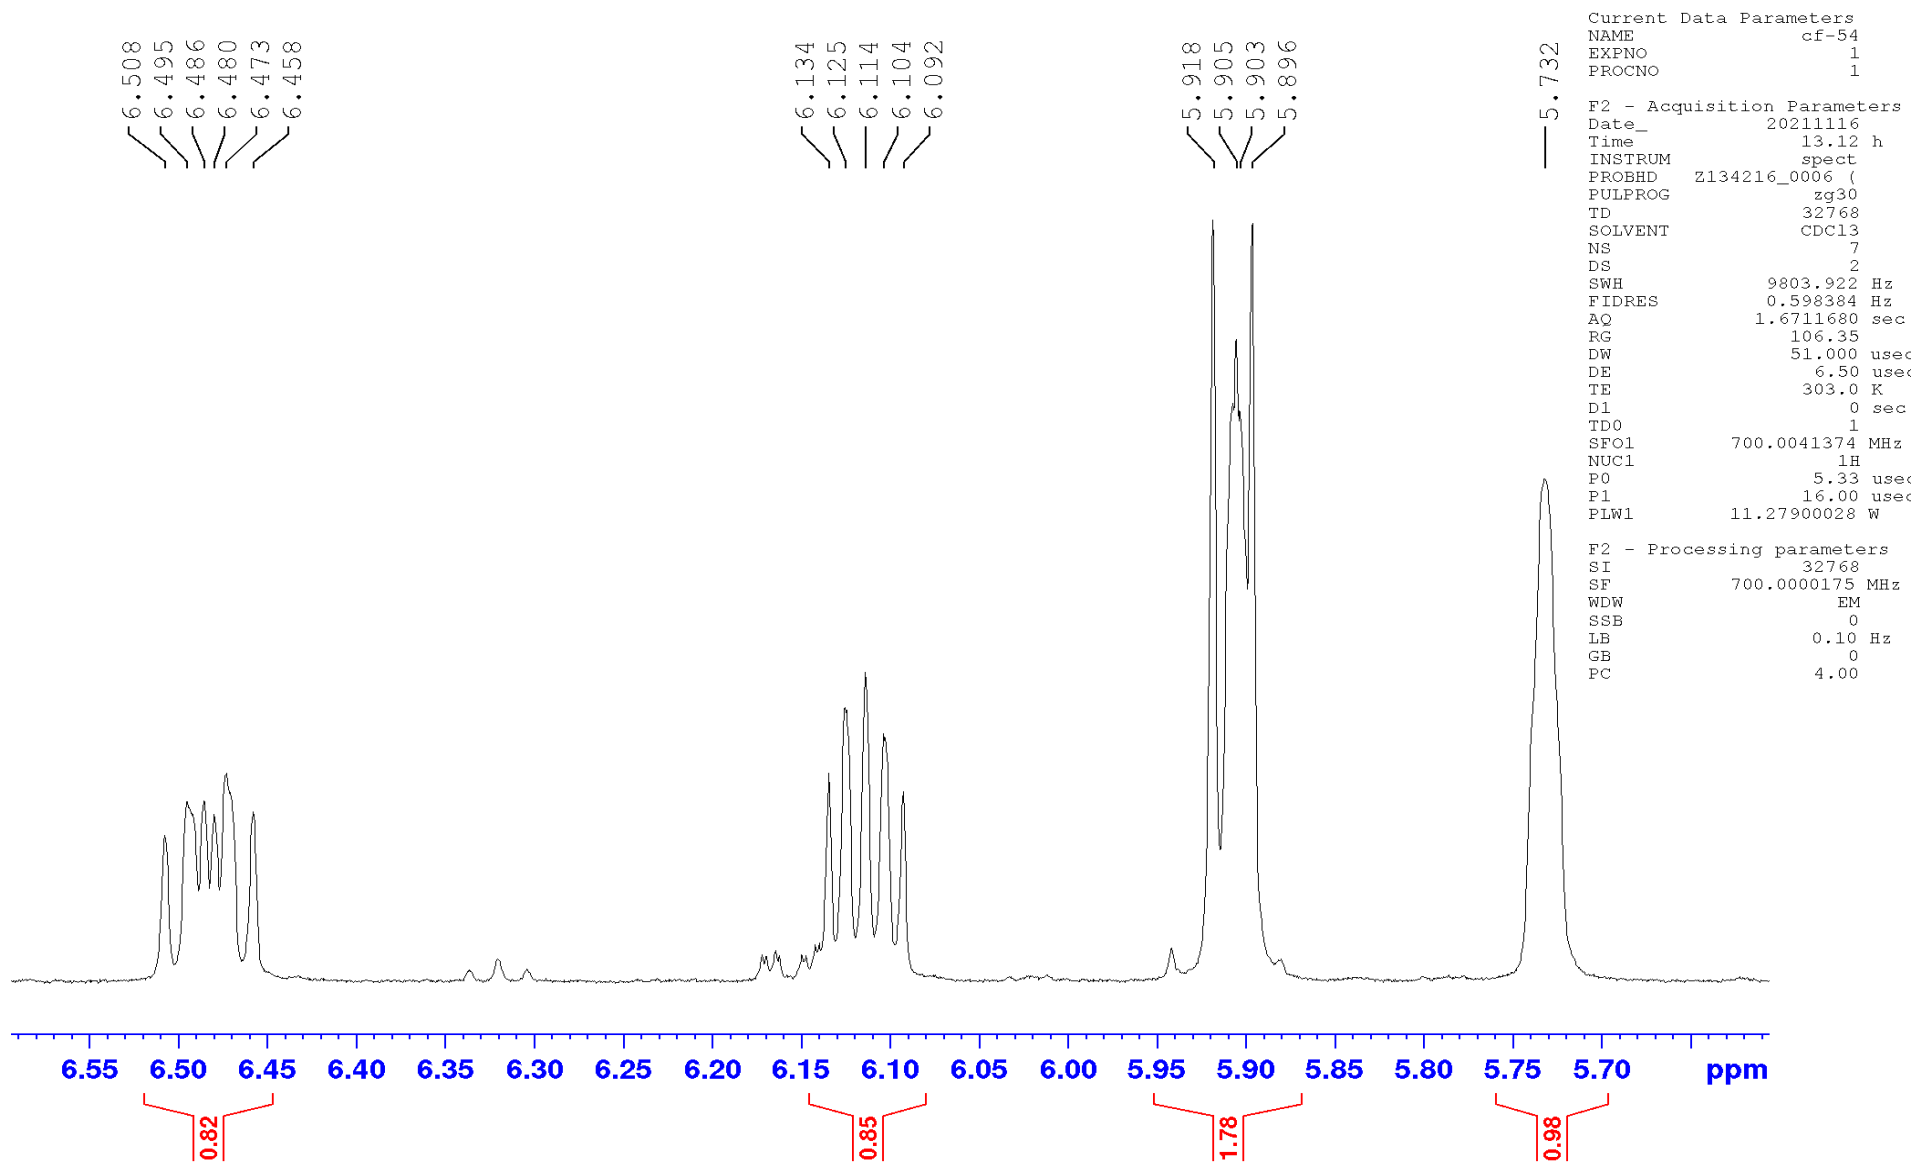

Expanded  $^1\text{H}$  NMR spectrum (700 MHz,  $\text{CDCl}_3$ ) of **12**

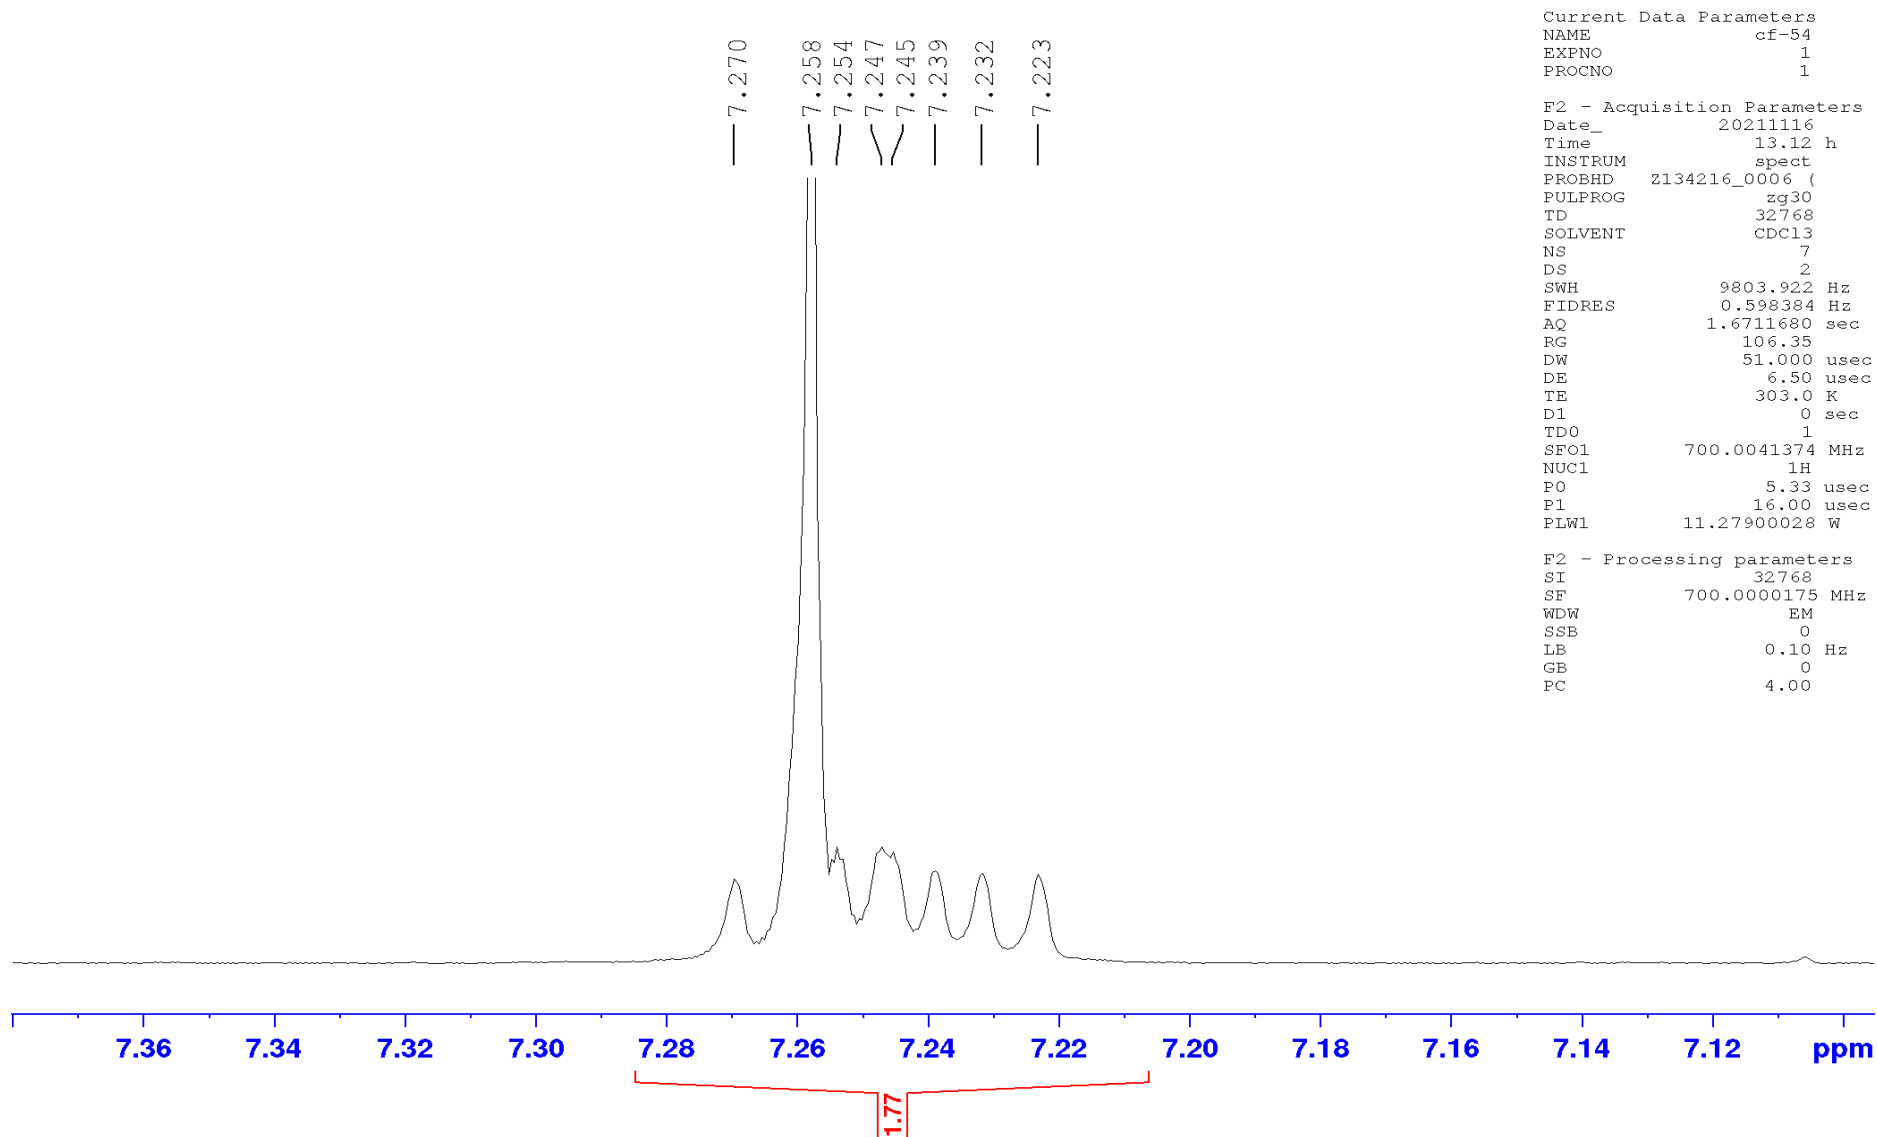

Expanded  $^1\text{H}$  NMR spectrum (700 MHz,  $\text{CDCl}_3$ ) of **12**

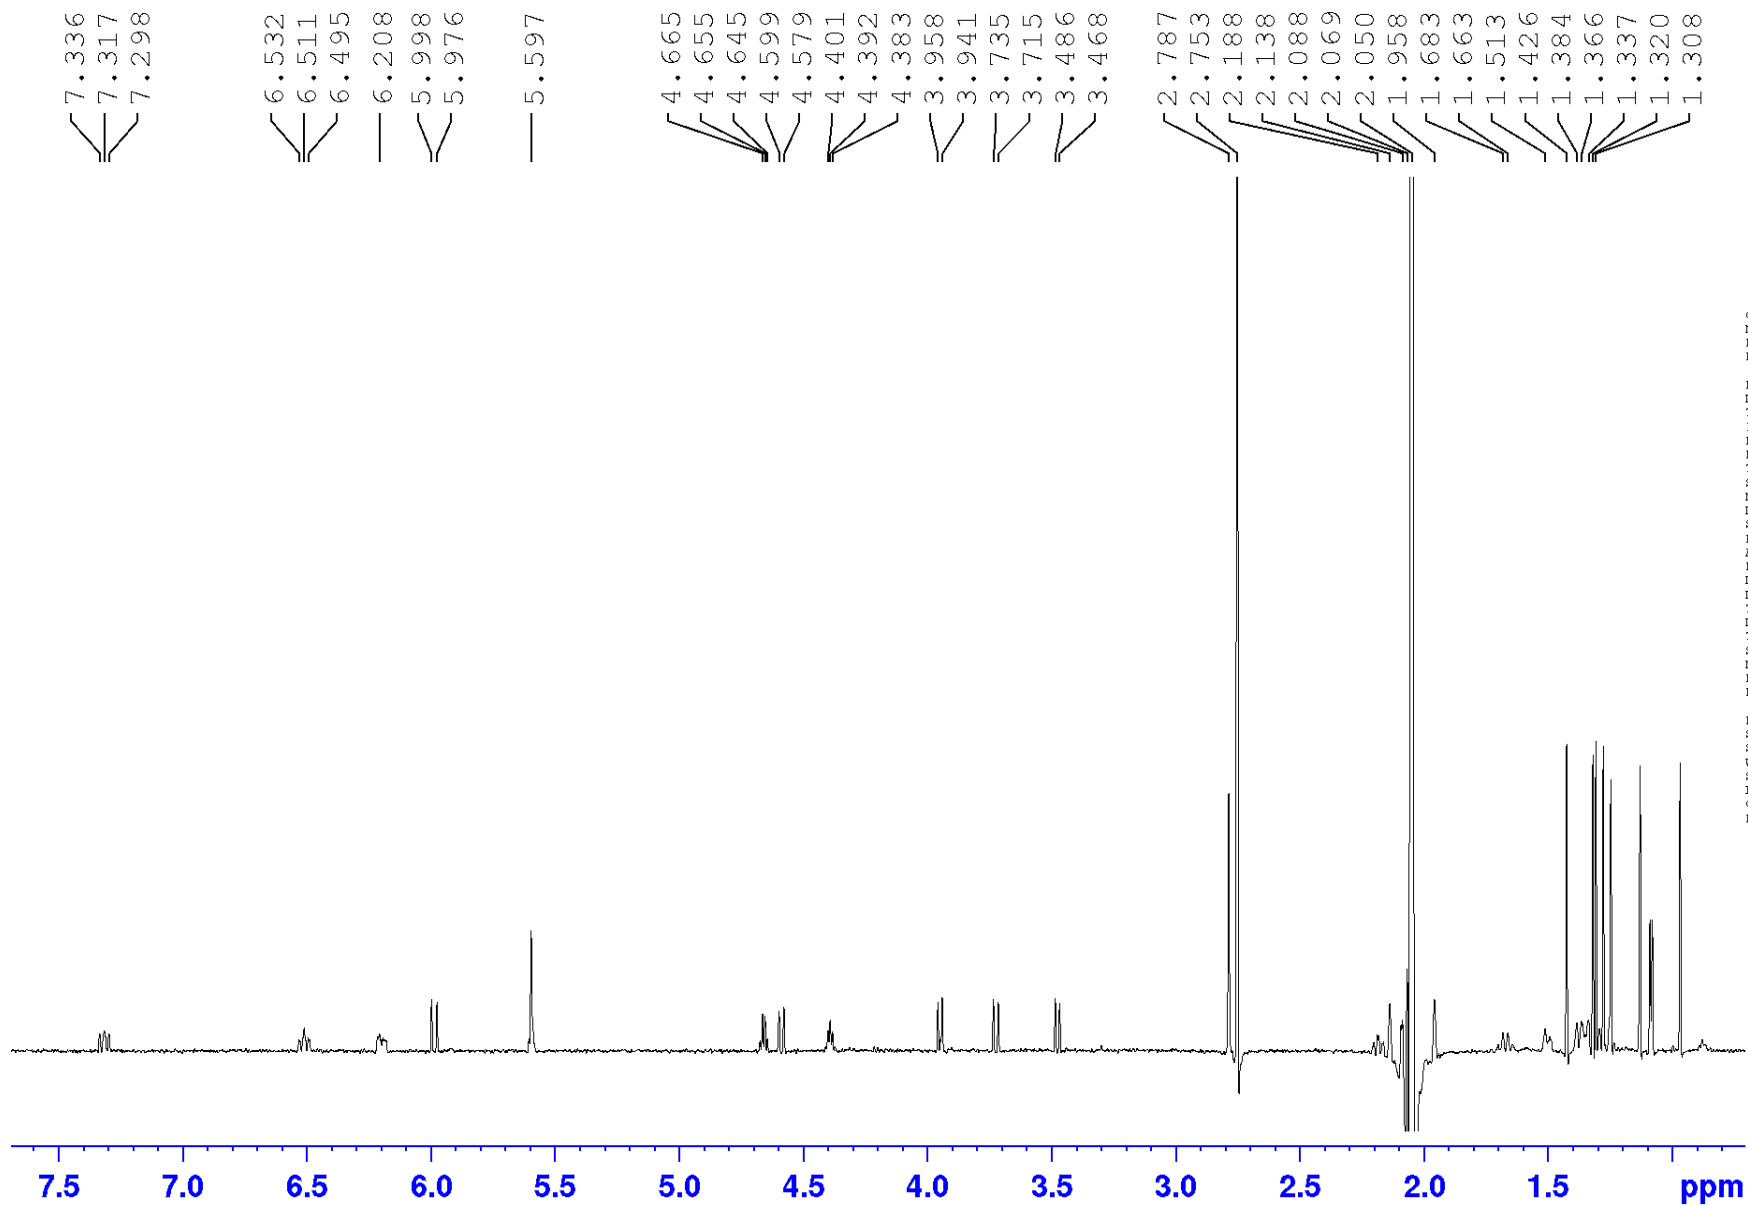

```

Current Data Parameters
NAME      CF-3ac-2
EXPNO     30
PROCNO    1

F2 - Acquisition Parameters
Date_     20210402
Time      14.00 h
INSTRUM   spect
PROBHD    Z112726_0001 (
PULPROG   zg
TD         16384
SOLVENT   Acetone
NS         1
DS         0
SWH        8417.509 Hz
FIDRES     1.027528 Hz
AQ         0.9732096 sec
RG         203
DM         59.400 usec
DE         6.50 usec
TE         303.0 K
D1         0 sec
TD0        1
SFO1       700.0035000 MHz
NUC1       1H
P1         12.60 usec
PLW1       39.81100082 W

F2 - Processing parameters
SI         32768
SF         700.0000119 MHz
WDW        GM
SSB        0
LB         -2.50 Hz
GB         0.08
PC         3.50

```

Figure S53.  $^1\text{H}$  NMR spectrum (700 MHz, acetone- $\text{d}_6$ ) of **1a**

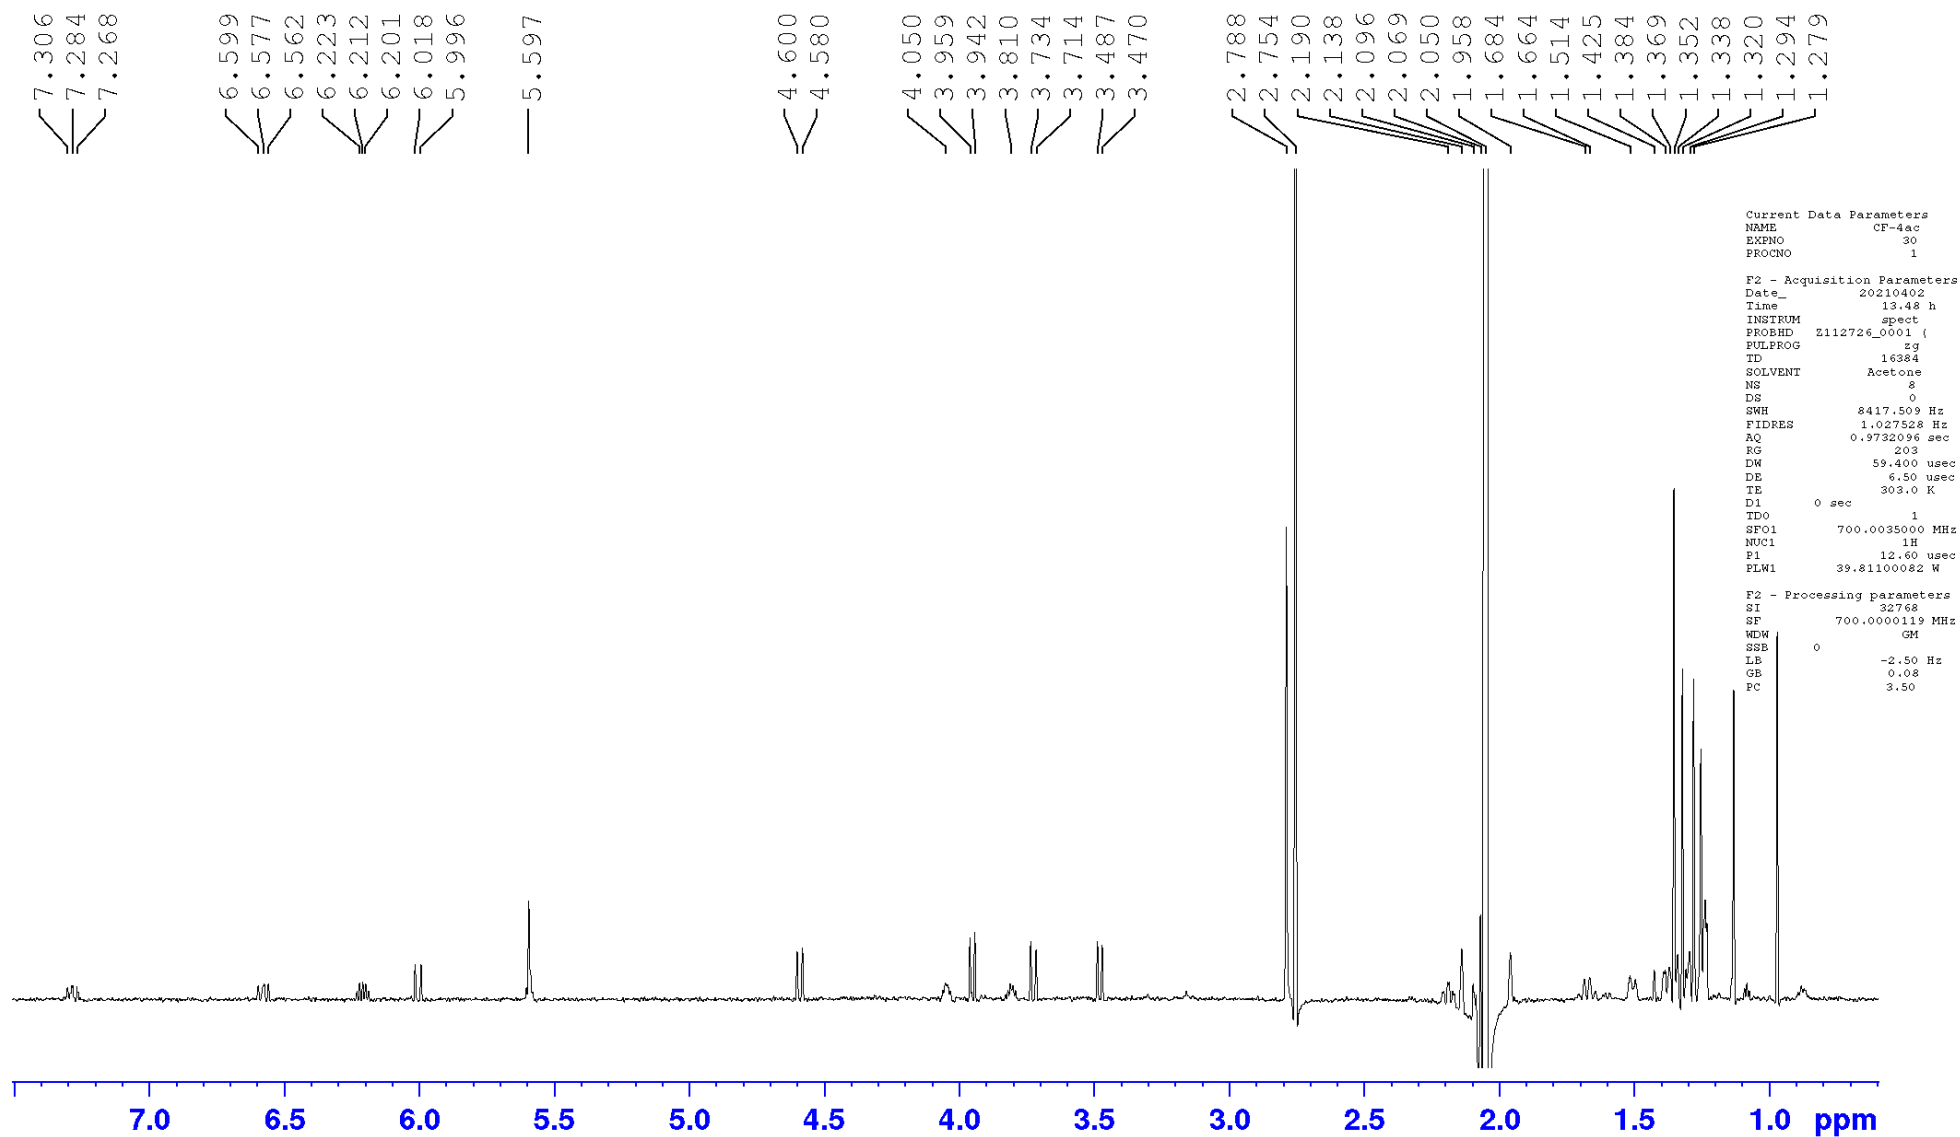

Figure S54.  $^1\text{H}$  NMR spectrum (700 MHz, acetone- $\text{d}_6$ ) of **2a**

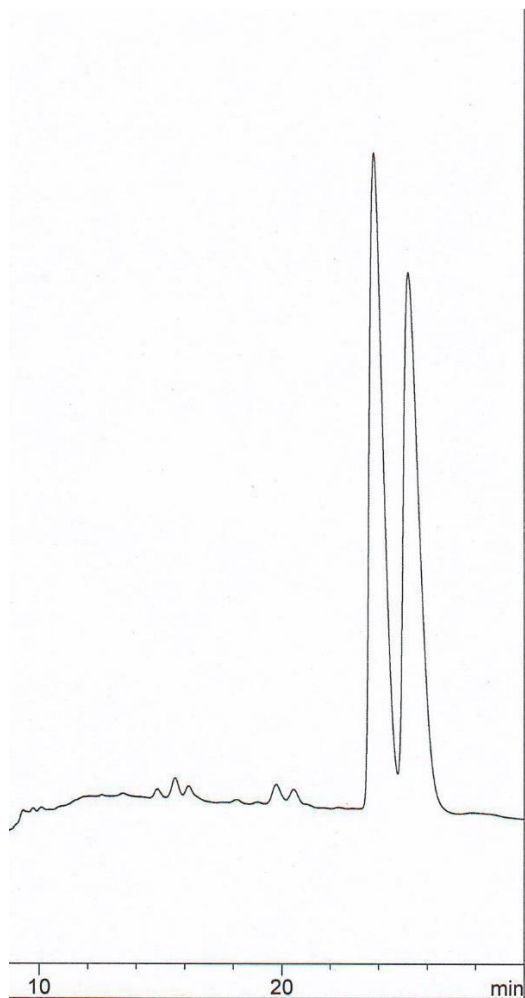

Figure S55. HPLC chart of compound **11** separation (Phenomenex CyperClone column, MeCN-water, 55:45, 0.7 ml/min).
